# Supplementary material for: In search of stable singlet metalla-N-heterocyclic carbenes (MNHCs): a contribution from theory
Source: Royal Society of Chemistry journal article supplement (doi:10.1039/c9dt02388g), 2019-01-01
Supplement: c9dt02388g1.pdf [file c9dt02388g1.pdf]

# Electronic Supplementary Information of

**In Search of Stable Singlet Metalla-*N*-Heterocyclic Carbenes (MNHCs): A**

**Contribution From Theory**

Shahnaz Sultana Rohman<sup>‡</sup>, Bijoy Ghosh<sup>‡</sup> and Ashwini K. Phukan\*

Department of Chemical Sciences, Tezpur University, Napaam 784028, Assam, India

E-Mail: [ashwini@tezu.ernet.in](mailto:ashwini@tezu.ernet.in)

<sup>‡</sup>These authors contributed equally

## Table of Contents

|          |                                                                                                                                                      |           |
|----------|------------------------------------------------------------------------------------------------------------------------------------------------------|-----------|
| Table S1 | Calculated Mullikens Spin Density Values at different position of the carbene framework in the triplet state of all MNHCs and their parent carbenes. | S2        |
| Fig. S1  | Figure showing the structures along with key geometrical parameters for the experimentally trapped and computationally designed MNHC                 | S3        |
| Table S2 | Calculated $\Delta E_{S-T}$ (in kcal mol <sup>-1</sup> ) values for some experimentally known carbenes.                                              | S3        |
| Table S3 | Comparison of $\Delta E_{S-T}$ values for some representative MNHCs with different functionals.                                                      | S3        |
| Fig. S2  | Singlet state optimized geometries for <b>1a-6b</b> .                                                                                                | S4-S7     |
|          | Cartesian Coordinates of singlet states optimized geometries for <b>1a-6b</b> in gas phase.                                                          | S8-S37    |
|          | Cartesian Coordinates of triplet state optimized geometries for <b>1a-6b</b> in gas phase.                                                           | S37-S63   |
|          | Cartesian coordinates for the optimized structure of GaCl <sub>3</sub> adducts of <b>1a-6b</b> .                                                     | S64-S90   |
|          | Cartesian coordinates for the optimized geometries of protonated complex <b>1a-6b</b> in gas phase.                                                  | S90-S122  |
|          | Cartesian coordinates for the singlet state optimized geometries of <b>1a-6b</b> in aqueous phase.                                                   | S123-S148 |
|          | Cartesian coordinates for the optimized geometries of protonated complex <b>1a-6b</b> in aqueous phase                                               | S148-S176 |

**Table S1** Calculated Mullikens Spin Density Values at different position of the carbene framework in the triplet states of all MNHCs and their parent carbenes. (**TM** = Transition Metal)

| <b>Molecule</b> | <b>Cc</b> | <b>C<sub>2</sub></b> | <b>TM</b> | <b>N<sub>1</sub></b> | <b>N<sub>2</sub></b> |
|-----------------|-----------|----------------------|-----------|----------------------|----------------------|
| <b>I</b>        | 1.789     |                      |           | 0.033                | 0.033                |
| <b>I'</b>       | 1.620     |                      |           | -0.021               | -0.021               |
| <b>II'</b>      | 1.730     |                      |           | -0.050               | -0.051               |
| <b>III</b>      | 1.669     |                      |           | -0.005               | -0.007               |
| <b>IV</b>       | 1.783     |                      |           | -0.049               | -0.092               |
| <b>1a</b>       | 1.067     | 0.977                | 0.054     | 0.070                | -0.170               |
| <b>1b</b>       | 1.013     | 0.930                | 0.045     | 0.073                | -0.173               |
| <b>1c</b>       | 1.050     | 0.833                | 0.094     | 0.062                | -0.167               |
| <b>1'a</b>      | 1.105     | 0.969                | -0.030    | 0.058                | -0.191               |
| <b>1'b</b>      | 1.065     | 0.866                | -0.029    | 0.079                | -0.201               |
| <b>1'c</b>      | 1.144     | 0.862                | -0.047    | 0.053                | -0.194               |
| <b>2a</b>       | 1.045     | 0.994                | 0.094     | 0.092                | -0.178               |
| <b>2b</b>       | 1.011     | 1.011                | 0.157     | 0.099                | -0.193               |
| <b>2c</b>       | 1.029     | 0.851                | 0.120     | 0.093                | -0.166               |
| <b>2'a</b>      | 1.121     | 0.949                | -0.000    | 0.083                | -0.188               |
| <b>2'b</b>      | 1.091     | 0.834                | -0.018    | 0.098                | -0.202               |
| <b>2'c</b>      | 1.150     | 0.788                | 0.008     | 0.093                | -0.210               |
| <b>3a</b>       | 1.035     | 1.019                | 0.229     | 0.109                | -0.205               |
| <b>3b</b>       | 0.943     | 0.949                | 0.284     | 0.107                | -0.187               |
| <b>3c</b>       | 1.001     | 0.918                | 0.243     | 0.102                | -0.179               |
| <b>3'a</b>      | 1.101     | 0.896                | 0.157     | 0.111                | -0.211               |
| <b>3'b</b>      | 1.095     | 0.843                | 0.100     | 0.109                | -0.226               |
| <b>3'c</b>      | 1.101     | 0.896                | 0.156     | 0.111                | -0.210               |
| <b>4'a</b>      | 1.463     | -0.020               | 0.098     | -0.028               | -0.102               |
| <b>4'b</b>      | 1.465     | 0.004                | -0.040    | -0.009               | -0.097               |
| <b>5a</b>       | 1.549     |                      | 0.046     | -0.019               | -0.019               |
| <b>5b</b>       | 1.527     |                      | -0.034    | -0.019               | -0.019               |
| <b>6a</b>       | 1.779     |                      | -0.009    | -0.0553              | -0.011               |
| <b>6b</b>       | 1.820     |                      | -0.019    | -0.056               | -0.012               |

N<sub>1</sub>= Amino group attached with TM center and C<sub>2</sub> = Carbon atom of the carbene backbone for the five membered MNHCs (**1a-4'b**).

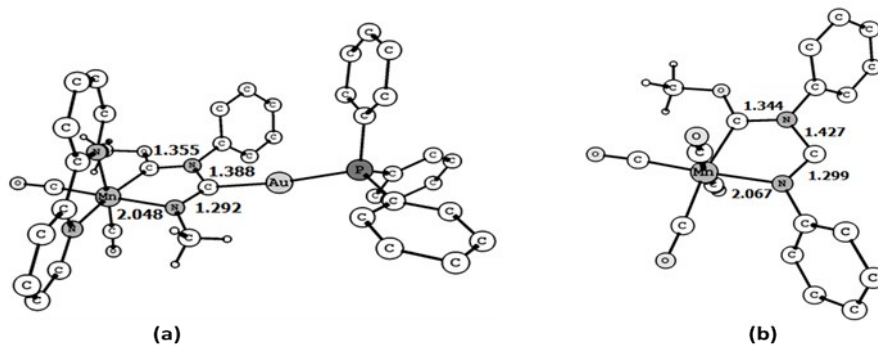

**Fig. S1** Figure showing the structure along with key geometrical parameters for the experimentally trapped (a)<sup>42</sup> and computationally designed MNHC (b = 1'c). (Hydrogen atoms of the phenyl and bipy groups are omitted for the sake of clarity).

**Table S2** PBE1PBE/6-311++G\*\* Calculated  $\Delta E_{S-T}$  (in kcal mol<sup>-1</sup>) values for some experimentally known carbenes.

| Sl. No. | Molecule        | $\Delta E_{S-T}$ |
|---------|-----------------|------------------|
| 1       | CAAC            | 38.5             |
| 2       | BICAAC          | 38.1             |
| 3       | 6-membered CAAC | 30.8             |
| 4       | DAC             | 40.4             |
| 5       | 5-membered DAC  | 34.0             |
| 6       | aNHC            | 48.3             |

**Table S3** Comparison of  $\Delta E_{S-T}$  values for some representative MNHCs with different functionals.

| Molecules | $\Delta E_{S-T}$ (kcal mol <sup>-1</sup> ) |      |        |       |
|-----------|--------------------------------------------|------|--------|-------|
|           | PBE1PBE                                    | M06  | WB97XD | TPSSH |
| 1c        | 43.3                                       | 46.1 | 46.7   | 43.4  |
| 2c        | 45.8                                       | 48.5 | 49.3   | 45.7  |
| 3c        | 48.0                                       | 50.1 | 51.4   | 47.9  |
| 6a        | 36.0                                       | 38.2 | 41.0   | 35.1  |

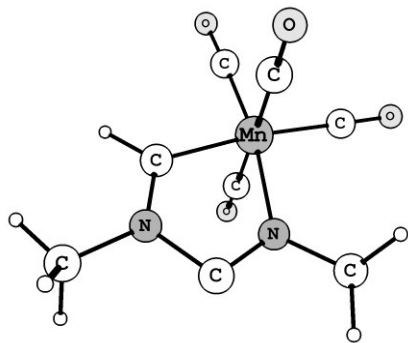

**1a**

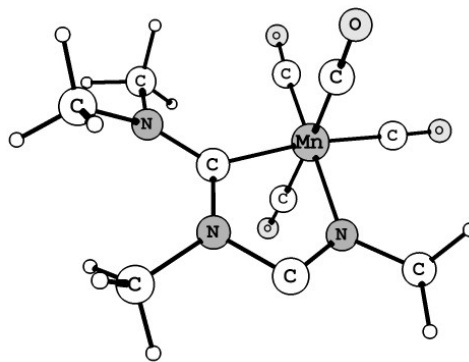

**1b**

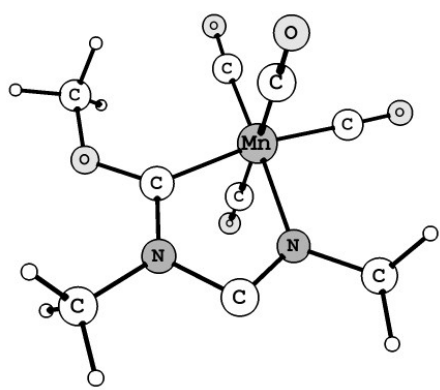

**1c**

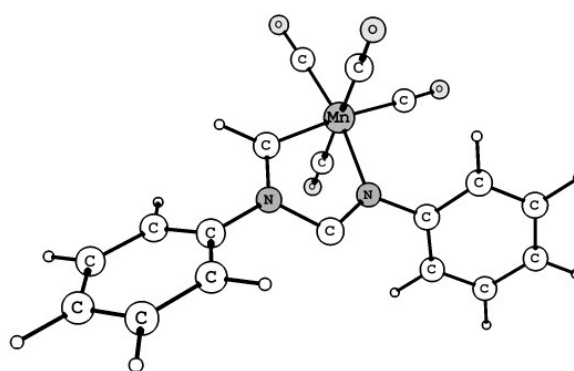

**1'a**

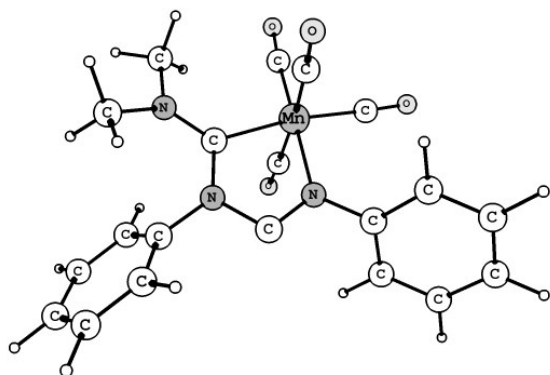

**1'b**

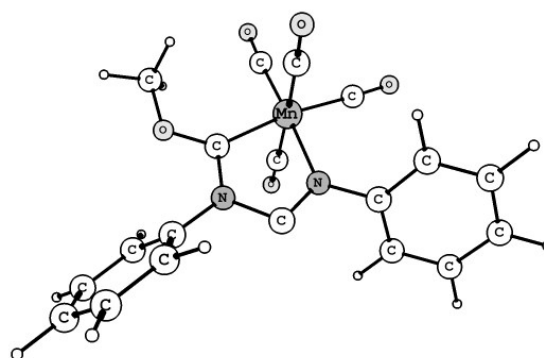

**1'c**

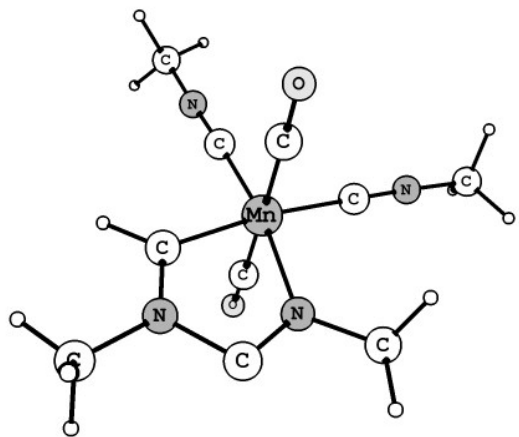

**2a**

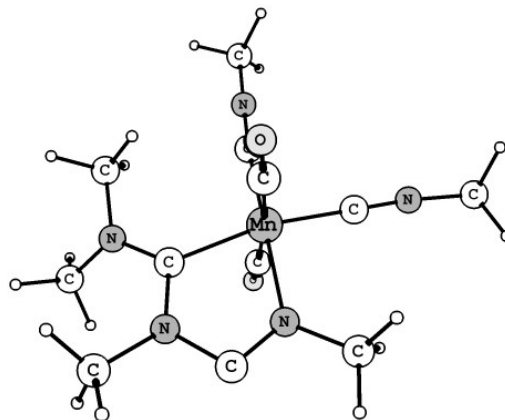

**2b**

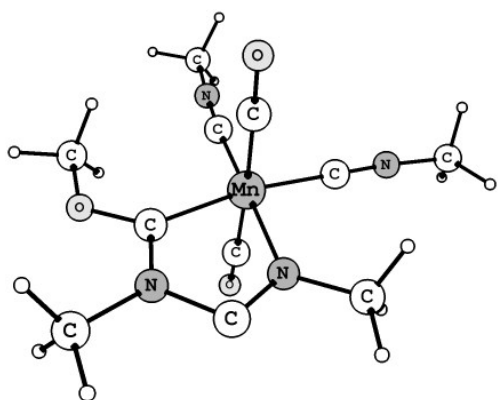

**2c**

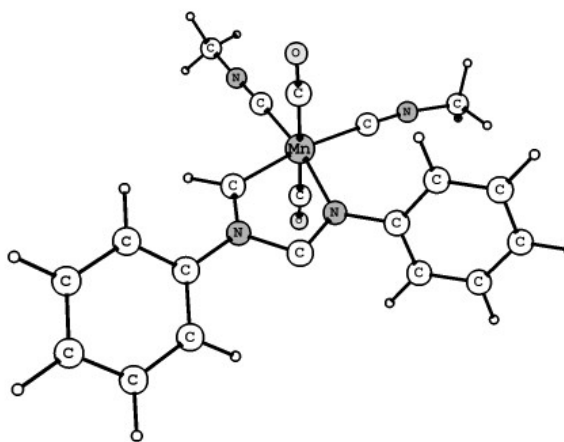

**2'a**

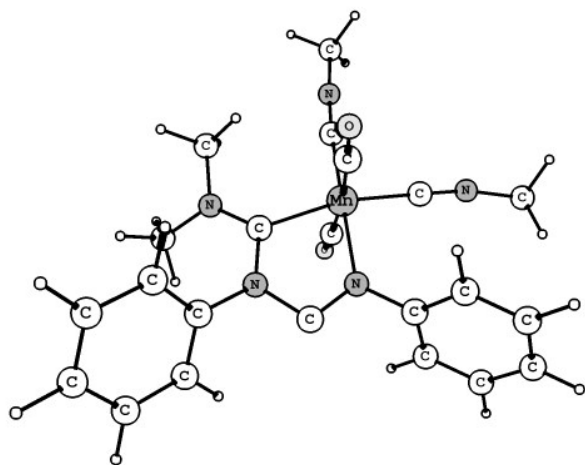

**2'b**

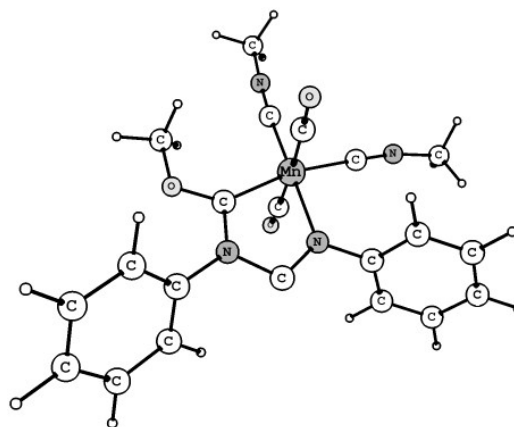

**2'c**

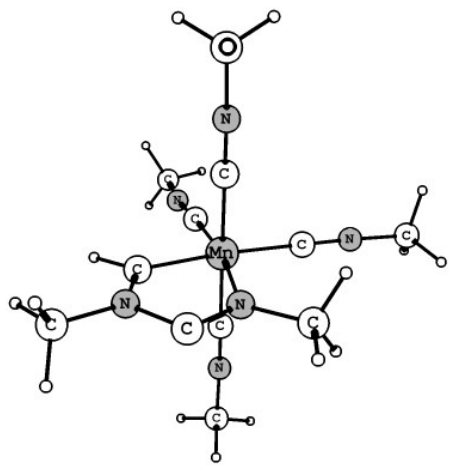

**3a**

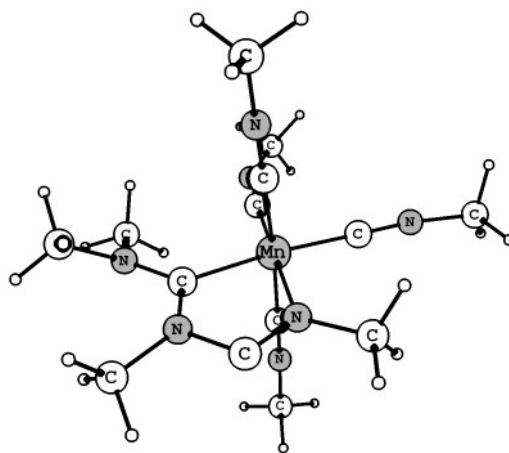

**3b**

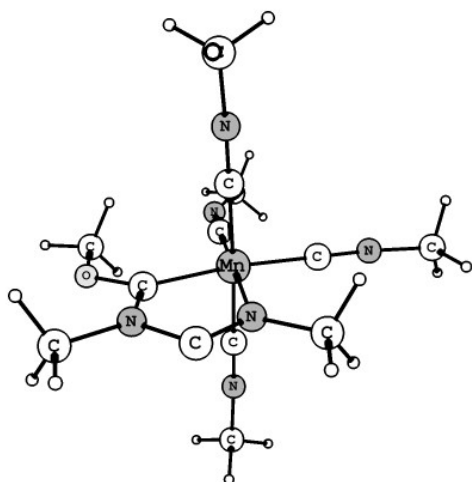

**3c**

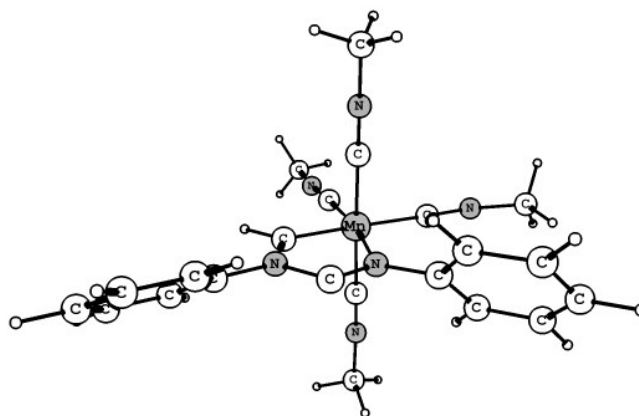

**3'a**

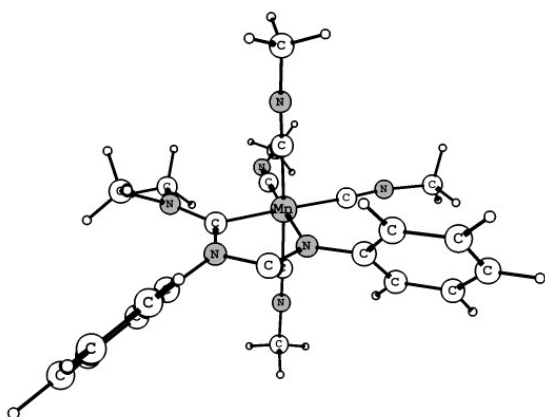

**3'b**

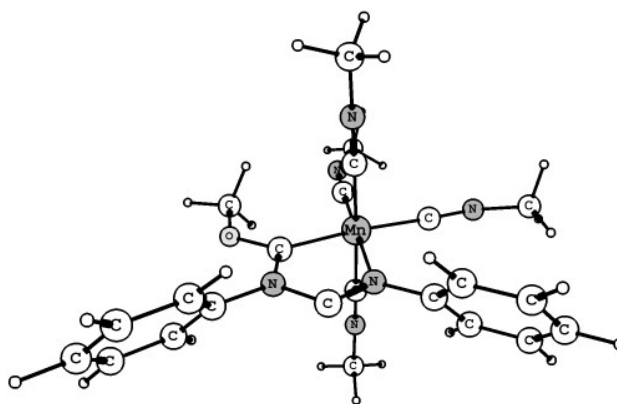

**3'c**

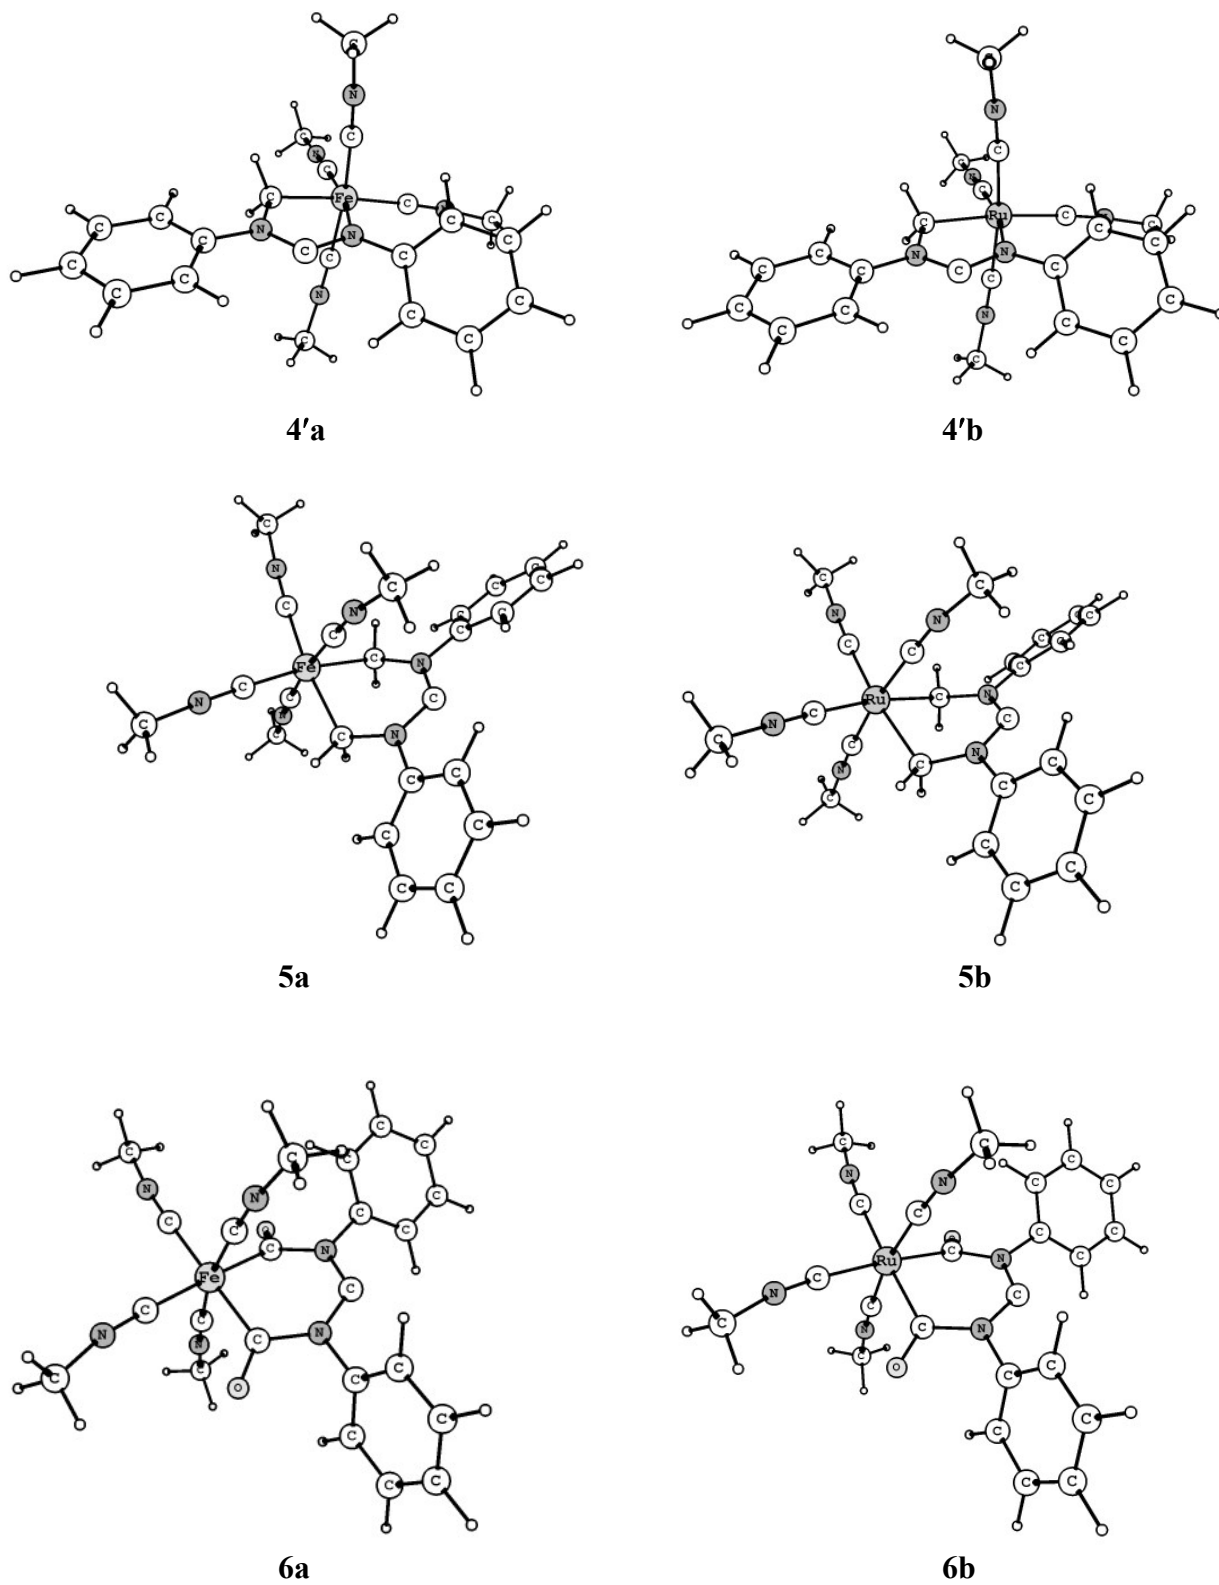

**Fig. S2** Singlet state optimized geometries for **1a-6b** (Molecules **4a** and **4b** are excluded as geometry optimizations of their triplet states lead to broken geometries).



Cartesian coordinates for the singlet state optimized geometries of **1a-6b**, along with their total energies (in hartrees) including zero point vibrational correction in gas phase.

**1a**, TE = -1869.440892

|    |              |              |              |
|----|--------------|--------------|--------------|
| 6  | -2.172373000 | 1.051563000  | 0.000185000  |
| 6  | -1.210825000 | -1.133707000 | -0.000209000 |
| 1  | -1.408825000 | -2.211650000 | -0.000360000 |
| 7  | -2.289544000 | -0.401172000 | -0.000048000 |
| 7  | -0.913307000 | 1.335263000  | 0.000244000  |
| 6  | -3.648300000 | -0.924769000 | -0.000117000 |
| 1  | -4.173562000 | -0.558700000 | -0.883685000 |
| 1  | -3.624573000 | -2.015078000 | -0.000124000 |
| 1  | -4.173635000 | -0.558708000 | 0.883408000  |
| 6  | -0.552982000 | 2.740890000  | 0.000456000  |
| 1  | 0.049330000  | 2.974170000  | 0.884778000  |
| 1  | 0.049383000  | 2.974419000  | -0.883765000 |
| 1  | -1.453953000 | 3.358143000  | 0.000517000  |
| 25 | 0.497174000  | -0.168159000 | -0.000045000 |
| 6  | 0.401138000  | -0.140770000 | 1.841710000  |
| 8  | 0.323255000  | -0.130956000 | 2.977465000  |
| 6  | 1.476595000  | -1.682494000 | -0.000334000 |
| 8  | 2.060764000  | -2.666520000 | -0.000459000 |
| 6  | 1.966879000  | 0.935707000  | 0.000206000  |
| 8  | 2.887609000  | 1.610238000  | 0.000329000  |
| 6  | 0.401142000  | -0.140023000 | -1.841793000 |
| 8  | 0.323221000  | -0.129717000 | -2.977540000 |

**1b**, TE = -2003.223939

|    |              |              |              |
|----|--------------|--------------|--------------|
| 6  | 0.514177000  | -2.389224000 | -0.066992000 |
| 6  | 1.252598000  | -0.106728000 | 0.121876000  |
| 7  | 1.553210000  | -1.421609000 | 0.080450000  |
| 7  | -0.635952000 | -1.806025000 | -0.122859000 |
| 25 | -0.763789000 | 0.232569000  | 0.008657000  |
| 6  | -0.833580000 | 0.035940000  | 1.839997000  |
| 8  | -0.842243000 | -0.088087000 | 2.972864000  |

|   |              |              |              |
|---|--------------|--------------|--------------|
| 6 | -0.838473000 | 2.029790000  | 0.093683000  |
| 8 | -0.971314000 | 3.169767000  | 0.124486000  |
| 6 | -2.577417000 | 0.208278000  | -0.179129000 |
| 8 | -3.713894000 | 0.217150000  | -0.296340000 |
| 6 | -0.471247000 | 0.267531000  | -1.809474000 |
| 8 | -0.259076000 | 0.292087000  | -2.929181000 |
| 6 | -1.801580000 | -2.658918000 | -0.256340000 |
| 6 | 2.849501000  | -1.994671000 | 0.436371000  |
| 7 | 2.272257000  | 0.774309000  | 0.094264000  |
| 6 | 3.501763000  | 0.568899000  | -0.663333000 |
| 1 | 4.377299000  | 0.424078000  | -0.022247000 |
| 1 | 3.400449000  | -0.279791000 | -1.335783000 |
| 1 | 3.670055000  | 1.460621000  | -1.275551000 |
| 6 | 2.104424000  | 2.144608000  | 0.539232000  |
| 1 | 3.044609000  | 2.479257000  | 0.987470000  |
| 1 | 1.858370000  | 2.818756000  | -0.289776000 |
| 1 | 1.332109000  | 2.203503000  | 1.300847000  |
| 1 | 3.382051000  | -1.326834000 | 1.115395000  |
| 1 | 2.642453000  | -2.938748000 | 0.937320000  |
| 1 | 3.474498000  | -2.206425000 | -0.435049000 |
| 1 | -1.488971000 | -3.705263000 | -0.282503000 |
| 1 | -2.485233000 | -2.507101000 | 0.586583000  |
| 1 | -2.348373000 | -2.423353000 | -1.176102000 |

**1c**, TE = - 1983.858696

|    |              |              |              |
|----|--------------|--------------|--------------|
| 6  | -1.131675000 | -2.198018000 | 0.000102000  |
| 6  | -1.422820000 | 0.171621000  | -0.000117000 |
| 7  | -1.970357000 | -1.041195000 | -0.000090000 |
| 7  | 0.106777000  | -1.829901000 | 0.000205000  |
| 25 | 0.592742000  | 0.167474000  | -0.000010000 |
| 6  | 0.502194000  | 0.094012000  | -1.841706000 |
| 8  | 0.429163000  | 0.047091000  | -2.976915000 |
| 6  | 0.951280000  | 1.933769000  | -0.000398000 |
| 8  | 1.254434000  | 3.040135000  | -0.000670000 |
| 6  | 2.388940000  | -0.175466000 | 0.000341000  |

|   |              |              |              |
|---|--------------|--------------|--------------|
| 8 | 3.514287000  | -0.365401000 | 0.000595000  |
| 6 | 0.501733000  | 0.094843000  | 1.841685000  |
| 8 | 0.428419000  | 0.048466000  | 2.976900000  |
| 6 | 1.108681000  | -2.879031000 | 0.000343000  |
| 8 | -2.350410000 | 1.112348000  | 0.000043000  |
| 6 | -1.988508000 | 2.488936000  | -0.000269000 |
| 1 | -1.417720000 | 2.737702000  | 0.895498000  |
| 1 | -1.417725000 | 2.737308000  | -0.896145000 |
| 1 | -2.929779000 | 3.036938000  | -0.000384000 |
| 6 | -3.413696000 | -1.246382000 | -0.000030000 |
| 1 | -3.867067000 | -0.799218000 | 0.887489000  |
| 1 | -3.867409000 | -0.797150000 | -0.886308000 |
| 1 | -3.573407000 | -2.322048000 | -0.001179000 |
| 1 | 0.617686000  | -3.854641000 | 0.000388000  |
| 1 | 1.749053000  | -2.797513000 | -0.884902000 |
| 1 | 1.748955000  | -2.797374000 | 0.885644000  |

**1'a**, TE = -2252.445512

|    |              |              |              |
|----|--------------|--------------|--------------|
| 6  | -0.637755000 | -1.243676000 | 0.033766000  |
| 6  | -1.206510000 | 1.077323000  | 0.056813000  |
| 1  | -2.020807000 | 1.806223000  | 0.117085000  |
| 7  | -1.620785000 | -0.168661000 | 0.038749000  |
| 7  | 0.537633000  | -0.695376000 | 0.049556000  |
| 25 | 0.719481000  | 1.373704000  | 0.004985000  |
| 6  | 0.635880000  | 1.232893000  | -1.835846000 |
| 8  | 0.564055000  | 1.144065000  | -2.967688000 |
| 6  | 0.527982000  | 3.163675000  | -0.052442000 |
| 8  | 0.358514000  | 4.294662000  | -0.087312000 |
| 6  | 2.563738000  | 1.467330000  | -0.057974000 |
| 8  | 3.696662000  | 1.575992000  | -0.108649000 |
| 6  | 0.706813000  | 1.371152000  | 1.851215000  |
| 8  | 0.678195000  | 1.376379000  | 2.989227000  |
| 6  | 1.647311000  | -1.586700000 | -0.004549000 |
| 6  | 2.664150000  | -1.495373000 | 0.943214000  |
| 6  | 1.726268000  | -2.553988000 | -1.005187000 |

|   |              |              |              |
|---|--------------|--------------|--------------|
| 6 | 3.744945000  | -2.366106000 | 0.894798000  |
| 1 | 2.597545000  | -0.755651000 | 1.733938000  |
| 6 | 2.814219000  | -3.416091000 | -1.055047000 |
| 1 | 0.922653000  | -2.621451000 | -1.729576000 |
| 6 | 3.827511000  | -3.326537000 | -0.107241000 |
| 1 | 4.525112000  | -2.293401000 | 1.645572000  |
| 1 | 2.868236000  | -4.163261000 | -1.840447000 |
| 1 | 4.676849000  | -4.000248000 | -0.149300000 |
| 6 | -3.004889000 | -0.539991000 | 0.044882000  |
| 6 | -3.406334000 | -1.656806000 | 0.770929000  |
| 6 | -3.933023000 | 0.209916000  | -0.670691000 |
| 6 | -4.751516000 | -1.998178000 | 0.804356000  |
| 1 | -2.657028000 | -2.245373000 | 1.285741000  |
| 6 | -5.276555000 | -0.140401000 | -0.630005000 |
| 1 | -3.607135000 | 1.046847000  | -1.279554000 |
| 6 | -5.689886000 | -1.241244000 | 0.110754000  |
| 1 | -5.066773000 | -2.865016000 | 1.375477000  |
| 1 | -5.998169000 | 0.441199000  | -1.193743000 |
| 1 | -6.738934000 | -1.516171000 | 0.136930000  |

**1'b**, TE = -2386.231629

|    |              |              |              |
|----|--------------|--------------|--------------|
| 6  | 0.261240000  | -1.424424000 | -0.291681000 |
| 6  | 1.095561000  | 0.839902000  | -0.195697000 |
| 7  | 1.343374000  | -0.506534000 | -0.245675000 |
| 7  | -0.869183000 | -0.795853000 | -0.181734000 |
| 25 | -0.874932000 | 1.236730000  | 0.179852000  |
| 6  | -0.535302000 | 0.835442000  | 1.950232000  |
| 8  | -0.290921000 | 0.595708000  | 3.036319000  |
| 6  | -0.854900000 | 3.003154000  | 0.509234000  |
| 8  | -0.931878000 | 4.128048000  | 0.726471000  |
| 6  | -2.687155000 | 1.279971000  | 0.453655000  |
| 8  | -3.806742000 | 1.367422000  | 0.650233000  |
| 6  | -1.007850000 | 1.508351000  | -1.637035000 |
| 8  | -1.047842000 | 1.689865000  | -2.762097000 |
| 6  | -2.040597000 | -1.603050000 | -0.177346000 |
| 6  | -3.067270000 | -1.360709000 | -1.087833000 |

|   |              |              |              |
|---|--------------|--------------|--------------|
| 6 | -2.174585000 | -2.644768000 | 0.739803000  |
| 6 | -4.210578000 | -2.149961000 | -1.083034000 |
| 1 | -2.960726000 | -0.562296000 | -1.815046000 |
| 6 | -3.321457000 | -3.428112000 | 0.745293000  |
| 1 | -1.363225000 | -2.834389000 | 1.433456000  |
| 6 | -4.345093000 | -3.184308000 | -0.163856000 |
| 1 | -4.998281000 | -1.955856000 | -1.804030000 |
| 1 | -3.414500000 | -4.235157000 | 1.465316000  |
| 1 | -5.241167000 | -3.796050000 | -0.156568000 |
| 6 | 2.628518000  | -1.114437000 | -0.064479000 |
| 6 | 3.003437000  | -2.192176000 | -0.862239000 |
| 6 | 3.465417000  | -0.685384000 | 0.962129000  |
| 6 | 4.226030000  | -2.814227000 | -0.649883000 |
| 1 | 2.316131000  | -2.543454000 | -1.622519000 |
| 6 | 4.689412000  | -1.312311000 | 1.167115000  |
| 1 | 3.151928000  | 0.125952000  | 1.611243000  |
| 6 | 5.076842000  | -2.374912000 | 0.359933000  |
| 1 | 4.512177000  | -3.654084000 | -1.274661000 |
| 1 | 5.333065000  | -0.976701000 | 1.973814000  |
| 1 | 6.029360000  | -2.867170000 | 0.524955000  |
| 7 | 2.084665000  | 1.668862000  | -0.542070000 |
| 6 | 3.212763000  | 1.310926000  | -1.398586000 |
| 1 | 4.138386000  | 1.184223000  | -0.829333000 |
| 1 | 3.007879000  | 0.392186000  | -1.942545000 |
| 1 | 3.344337000  | 2.121140000  | -2.121138000 |
| 6 | 2.024820000  | 3.091786000  | -0.250006000 |
| 1 | 3.047504000  | 3.469468000  | -0.179851000 |
| 1 | 1.504135000  | 3.646300000  | -1.038778000 |
| 1 | 1.537842000  | 3.269458000  | 0.704004000  |

**1'**c, TE = -2366.859552

|   |              |              |              |
|---|--------------|--------------|--------------|
| 6 | 0.420301000  | -1.411901000 | -0.010218000 |
| 6 | 1.166502000  | 0.863722000  | -0.069596000 |
| 7 | 1.469146000  | -0.443919000 | -0.007843000 |
| 7 | -0.728537000 | -0.806895000 | -0.041580000 |

|    |              |              |              |
|----|--------------|--------------|--------------|
| 25 | -0.801206000 | 1.257869000  | 0.035776000  |
| 6  | -0.634488000 | 1.082371000  | 1.868127000  |
| 8  | -0.511106000 | 0.976236000  | 2.994207000  |
| 6  | -0.784837000 | 3.054873000  | 0.144204000  |
| 8  | -0.854196000 | 4.197071000  | 0.223024000  |
| 6  | -2.634402000 | 1.315339000  | 0.163294000  |
| 8  | -3.765058000 | 1.412089000  | 0.260708000  |
| 6  | -0.821531000 | 1.286755000  | -1.809124000 |
| 8  | -0.809159000 | 1.313778000  | -2.947860000 |
| 6  | -1.880338000 | -1.643292000 | -0.017309000 |
| 6  | -2.858317000 | -1.520993000 | -1.002109000 |
| 6  | -2.038266000 | -2.596067000 | 0.988029000  |
| 6  | -3.978275000 | -2.342444000 | -0.983634000 |
| 1  | -2.731685000 | -0.794528000 | -1.798175000 |
| 6  | -3.162506000 | -3.411580000 | 1.006097000  |
| 1  | -1.262821000 | -2.693210000 | 1.739379000  |
| 6  | -4.137807000 | -3.288313000 | 0.022677000  |
| 1  | -4.727305000 | -2.244159000 | -1.762804000 |
| 1  | -3.274938000 | -4.149205000 | 1.794429000  |
| 1  | -5.015784000 | -3.925452000 | 0.039652000  |
| 6  | 2.814690000  | -0.949774000 | -0.030297000 |
| 6  | 3.173751000  | -1.852682000 | -1.022919000 |
| 6  | 3.726227000  | -0.580354000 | 0.951483000  |
| 6  | 4.461234000  | -2.373740000 | -1.042672000 |
| 1  | 2.434388000  | -2.153902000 | -1.755740000 |
| 6  | 5.011688000  | -1.105772000 | 0.926066000  |
| 1  | 3.428672000  | 0.106007000  | 1.736079000  |
| 6  | 5.383486000  | -1.999484000 | -0.072085000 |
| 1  | 4.740873000  | -3.080202000 | -1.817104000 |
| 1  | 5.721915000  | -0.821582000 | 1.695511000  |
| 1  | 6.387465000  | -2.410518000 | -0.087385000 |
| 8  | 2.241667000  | 1.608266000  | -0.193672000 |
| 6  | 2.150911000  | 3.022317000  | -0.330104000 |
| 1  | 1.502807000  | 3.289515000  | -1.165759000 |
| 1  | 1.789431000  | 3.475705000  | 0.593886000  |

1 3.167553000 3.357108000 -0.531134000

**2a**, TE = -1908.101357

6 -2.622628000 -1.105956000 -0.015458000  
6 -1.618175000 1.058386000 -0.018360000  
1 -1.808713000 2.140081000 -0.025029000  
7 -2.716927000 0.344718000 -0.023221000  
7 -1.364940000 -1.404873000 -0.004461000  
6 -4.063266000 0.892883000 -0.035954000  
1 -4.606432000 0.545043000 0.844913000  
1 -4.017860000 1.983165000 -0.040648000  
1 -4.593077000 0.536836000 -0.921658000  
6 -1.035923000 -2.815088000 0.005007000  
1 -0.430059000 -3.065925000 -0.873235000  
1 -0.444028000 -3.057280000 0.895128000  
1 -1.948864000 -3.416609000 0.000749000  
6 0.058238000 0.082699000 -1.833103000  
8 0.063808000 0.105801000 -2.977712000  
6 0.030164000 0.099981000 1.831012000  
8 0.018110000 0.133795000 2.975301000  
6 1.536029000 -1.093871000 0.015694000  
7 2.446137000 -1.832444000 0.025651000  
6 1.085606000 1.624679000 -0.000435000  
7 1.688010000 2.633360000 -0.000653000  
6 2.456839000 3.812231000 -0.000461000  
1 2.235883000 4.408413000 -0.889860000  
1 2.232095000 4.410568000 0.886539000  
1 3.523355000 3.570122000 0.002090000  
6 3.502573000 -2.762937000 0.037268000  
1 4.126876000 -2.634422000 -0.850582000  
1 4.120983000 -2.619003000 0.926873000  
1 3.106692000 -3.782124000 0.044792000  
25 0.063975000 0.085153000 -0.000876000

**2b**, TE = -2041.880222

|    |              |              |              |
|----|--------------|--------------|--------------|
| 6  | -1.253403000 | -2.489508000 | 0.020885000  |
| 6  | -1.622067000 | -0.110585000 | 0.096179000  |
| 7  | -2.130976000 | -1.361380000 | 0.091845000  |
| 7  | -0.026861000 | -2.085968000 | -0.025179000 |
| 6  | 0.204289000  | 0.007447000  | -1.771299000 |
| 8  | 0.055237000  | 0.100998000  | -2.904136000 |
| 6  | 0.442439000  | -0.162591000 | 1.873772000  |
| 8  | 0.441194000  | -0.179813000 | 3.019519000  |
| 6  | 2.240150000  | -0.429291000 | -0.105549000 |
| 7  | 3.390726000  | -0.635509000 | -0.204093000 |
| 6  | 0.798147000  | 1.722074000  | 0.091338000  |
| 7  | 1.143295000  | 2.847848000  | 0.108018000  |
| 6  | 1.575655000  | 4.185769000  | 0.127191000  |
| 1  | 0.720938000  | 4.864870000  | 0.204848000  |
| 1  | 2.235248000  | 4.360016000  | 0.982114000  |
| 1  | 2.123748000  | 4.422019000  | -0.789388000 |
| 6  | 4.738008000  | -1.025678000 | -0.323028000 |
| 1  | 5.160785000  | -0.645634000 | -1.256678000 |
| 1  | 5.321283000  | -0.631153000 | 0.512980000  |
| 1  | 4.814139000  | -2.116758000 | -0.320861000 |
| 25 | 0.407502000  | -0.082779000 | 0.043638000  |
| 6  | 0.984682000  | -3.119856000 | -0.083608000 |
| 6  | -3.510634000 | -1.703829000 | 0.419779000  |
| 7  | -2.511691000 | 0.909103000  | -0.002083000 |
| 6  | -2.153978000 | 2.255402000  | 0.388054000  |
| 1  | -1.393800000 | 2.230881000  | 1.163846000  |
| 1  | -1.786372000 | 2.845398000  | -0.462227000 |
| 1  | -3.044065000 | 2.749629000  | 0.791672000  |
| 6  | -3.701318000 | 0.856752000  | -0.840364000 |
| 1  | -3.684338000 | -0.028721000 | -1.472256000 |
| 1  | -4.633275000 | 0.872058000  | -0.264167000 |
| 1  | -3.692571000 | 1.732908000  | -1.498151000 |
| 1  | -3.474762000 | -2.648429000 | 0.960410000  |
| 1  | -3.950060000 | -0.931414000 | 1.054238000  |



|   |              |              |              |
|---|--------------|--------------|--------------|
| 1 | -4.139039000 | -1.848240000 | -0.463971000 |
| 1 | 1.662592000  | -3.040767000 | 0.775121000  |
| 1 | 0.509303000  | -4.104556000 | -0.077412000 |
| 1 | 1.587974000  | -3.017403000 | -0.993791000 |

2c, TE = -2022.517880

|    |              |              |              |
|----|--------------|--------------|--------------|
| 6  | 1.865768000  | -2.151697000 | -0.000098000 |
| 6  | 1.777099000  | 0.235701000  | -0.000239000 |
| 7  | 2.512917000  | -0.875718000 | -0.000396000 |
| 7  | 0.584530000  | -1.972927000 | 0.000423000  |
| 6  | -0.146363000 | -0.058104000 | 1.832369000  |
| 8  | -0.112279000 | -0.021229000 | 2.976207000  |
| 6  | -0.146977000 | -0.058743000 | -1.831630000 |
| 8  | -0.113337000 | -0.022393000 | -2.975491000 |
| 6  | -1.951411000 | -0.737653000 | 0.000570000  |
| 7  | -3.048085000 | -1.150653000 | 0.000710000  |
| 6  | -0.880013000 | 1.651635000  | 0.000169000  |
| 7  | -1.396806000 | 2.709033000  | 0.000032000  |
| 6  | -2.075885000 | 3.941548000  | -0.000166000 |
| 1  | -1.364007000 | 4.772171000  | -0.007603000 |
| 1  | -2.713560000 | 4.023006000  | -0.884873000 |
| 1  | -2.702458000 | 4.029360000  | 0.891826000  |
| 6  | -4.312563000 | -1.770563000 | -0.001387000 |
| 1  | -4.814834000 | -1.604932000 | 0.955005000  |
| 1  | -4.933138000 | -1.359366000 | -0.801467000 |
| 1  | -4.201036000 | -2.846809000 | -0.159438000 |
| 25 | -0.198791000 | -0.067596000 | 0.000369000  |
| 6  | -0.229419000 | -3.169926000 | 0.000933000  |
| 6  | 3.968104000  | -0.854500000 | -0.000891000 |
| 8  | 2.565045000  | 1.308135000  | -0.000647000 |
| 6  | 1.991799000  | 2.605061000  | -0.000686000 |
| 1  | 1.383497000  | 2.759019000  | -0.893704000 |
| 1  | 1.383957000  | 2.759303000  | 0.892591000  |
| 1  | 2.833940000  | 3.297537000  | -0.001019000 |
| 1  | 4.291319000  | -1.893325000 | -0.001216000 |

|   |              |              |              |
|---|--------------|--------------|--------------|
| 1 | 4.350149000  | -0.341944000 | -0.887372000 |
| 1 | 4.350767000  | -0.342348000 | 0.885563000  |
| 1 | -0.876363000 | -3.193987000 | -0.884340000 |
| 1 | 0.413001000  | -4.054600000 | 0.000594000  |
| 1 | -0.875619000 | -3.194000000 | 0.886647000  |

**2'a**, TE = -2291.109734

|    |              |              |              |
|----|--------------|--------------|--------------|
| 6  | -0.947680000 | -1.495480000 | 0.051411000  |
| 6  | -1.386996000 | 0.852277000  | -0.033428000 |
| 1  | -2.172056000 | 1.613808000  | -0.110401000 |
| 7  | -1.873422000 | -0.376348000 | 0.026707000  |
| 7  | 0.249717000  | -0.994956000 | 0.103141000  |
| 6  | 0.521796000  | 0.928648000  | -1.860139000 |
| 8  | 0.513694000  | 0.880578000  | -3.002595000 |
| 6  | 0.518012000  | 1.234714000  | 1.796991000  |
| 8  | 0.501774000  | 1.379852000  | 2.932227000  |
| 6  | 2.418530000  | 0.946647000  | -0.053507000 |
| 7  | 3.582021000  | 0.833344000  | -0.093783000 |
| 6  | 0.443880000  | 2.903322000  | -0.176533000 |
| 7  | 0.337828000  | 4.068688000  | -0.267474000 |
| 6  | 0.272331000  | 5.470922000  | -0.378077000 |
| 1  | -0.432443000 | 5.755229000  | -1.163715000 |
| 1  | -0.060258000 | 5.908389000  | 0.566809000  |
| 1  | 1.256717000  | 5.877168000  | -0.625998000 |
| 6  | 4.938184000  | 0.448754000  | -0.129684000 |
| 1  | 5.354644000  | 0.643888000  | -1.120649000 |
| 1  | 5.508611000  | 1.013981000  | 0.611021000  |
| 1  | 5.016816000  | -0.619822000 | 0.089718000  |
| 25 | 0.526982000  | 1.062725000  | -0.028314000 |
| 6  | 1.319074000  | -1.926904000 | 0.128814000  |
| 6  | 2.211729000  | -1.930230000 | 1.200713000  |
| 6  | 1.504722000  | -2.833960000 | -0.913083000 |
| 6  | 3.268665000  | -2.831396000 | 1.231916000  |
| 1  | 2.056590000  | -1.235521000 | 2.019596000  |
| 6  | 2.570487000  | -3.726186000 | -0.884733000 |

|   |              |              |              |
|---|--------------|--------------|--------------|
| 1 | 0.798792000  | -2.831498000 | -1.736122000 |
| 6 | 3.458185000  | -3.729994000 | 0.185550000  |
| 1 | 3.939725000  | -2.841214000 | 2.085946000  |
| 1 | 2.702506000  | -4.427839000 | -1.702687000 |
| 1 | 4.284140000  | -4.433572000 | 0.209997000  |
| 6 | -3.271299000 | -0.670452000 | 0.053764000  |
| 6 | -3.751819000 | -1.788635000 | -0.622527000 |
| 6 | -4.147956000 | 0.150484000  | 0.758182000  |
| 6 | -5.113422000 | -2.059296000 | -0.617841000 |
| 1 | -3.044438000 | -2.434432000 | -1.127585000 |
| 6 | -5.509286000 | -0.127101000 | 0.754719000  |
| 1 | -3.764814000 | 0.988258000  | 1.331243000  |
| 6 | -5.997744000 | -1.229324000 | 0.063490000  |
| 1 | -5.485111000 | -2.928683000 | -1.150411000 |
| 1 | -6.186713000 | 0.512532000  | 1.311022000  |
| 1 | -7.060371000 | -1.448183000 | 0.066898000  |

**2'b**, TE = -2424.891845

|    |              |              |              |
|----|--------------|--------------|--------------|
| 6  | -0.745405000 | -1.611322000 | -0.199377000 |
| 6  | -1.258902000 | 0.755588000  | -0.144063000 |
| 7  | -1.691321000 | -0.543114000 | -0.191648000 |
| 7  | 0.451123000  | -1.135531000 | -0.027579000 |
| 6  | 0.764395000  | 0.951588000  | -1.782748000 |
| 8  | 0.748776000  | 1.028279000  | -2.925630000 |
| 6  | 0.589918000  | 0.919081000  | 1.872904000  |
| 8  | 0.457331000  | 0.971693000  | 3.010108000  |
| 6  | 2.614060000  | 0.646285000  | 0.083314000  |
| 7  | 3.773226000  | 0.481209000  | 0.070958000  |
| 6  | 1.057881000  | 2.728764000  | 0.060325000  |
| 7  | 1.349118000  | 3.869093000  | 0.063647000  |
| 6  | 1.786966000  | 5.206394000  | 0.067538000  |
| 1  | 0.932833000  | 5.889770000  | 0.053512000  |
| 1  | 2.379085000  | 5.408757000  | 0.964454000  |
| 1  | 2.405677000  | 5.405333000  | -0.812029000 |
| 6  | 5.094305000  | -0.012788000 | 0.051819000  |
| 1  | 5.563091000  | 0.210295000  | -0.909667000 |
| 1  | 5.681901000  | 0.452368000  | 0.846964000  |
| 1  | 5.075601000  | -1.096224000 | 0.200776000  |
| 25 | 0.754974000  | 0.907445000  | 0.047730000  |
| 6  | 1.498378000  | -2.090441000 | -0.007176000 |
| 6  | 2.269913000  | -2.258262000 | 1.143412000  |

|   |              |              |              |
|---|--------------|--------------|--------------|
| 6 | 1.781284000  | -2.867623000 | -1.129550000 |
| 6 | 3.299929000  | -3.190664000 | 1.171726000  |
| 1 | 2.038579000  | -1.666036000 | 2.022901000  |
| 6 | 2.818150000  | -3.793609000 | -1.102301000 |
| 1 | 1.167884000  | -2.741911000 | -2.015030000 |
| 6 | 3.584149000  | -3.960160000 | 0.046364000  |
| 1 | 3.873717000  | -3.328130000 | 2.083790000  |
| 1 | 3.022347000  | -4.394901000 | -1.983173000 |
| 1 | 4.386694000  | -4.690514000 | 0.069664000  |
| 6 | -3.038020000 | -0.973996000 | 0.031325000  |
| 6 | -3.584531000 | -1.977850000 | -0.764580000 |
| 6 | -3.775300000 | -0.456382000 | 1.093520000  |
| 6 | -4.872529000 | -2.432719000 | -0.518184000 |
| 1 | -2.976761000 | -2.405559000 | -1.552849000 |
| 6 | -5.065391000 | -0.915827000 | 1.334225000  |
| 1 | -3.331243000 | 0.294588000  | 1.738598000  |
| 6 | -5.621881000 | -1.900648000 | 0.527057000  |
| 1 | -5.290931000 | -3.215257000 | -1.143152000 |
| 1 | -5.629806000 | -0.511256000 | 2.168467000  |
| 1 | -6.626646000 | -2.262071000 | 0.719493000  |
| 7 | -2.165869000 | 1.711535000  | -0.410220000 |
| 6 | -1.928244000 | 3.095104000  | -0.053248000 |
| 1 | -1.213603000 | 3.153611000  | 0.761536000  |
| 1 | -1.557730000 | 3.675893000  | -0.907113000 |
| 1 | -2.874566000 | 3.534473000  | 0.279070000  |
| 6 | -3.363119000 | 1.538755000  | -1.223670000 |
| 1 | -3.307557000 | 0.620795000  | -1.804209000 |
| 1 | -4.277569000 | 1.517671000  | -0.622009000 |
| 1 | -3.414180000 | 2.384467000  | -1.916957000 |

**2'c**, TE = -2405.522744

|   |              |              |              |
|---|--------------|--------------|--------------|
| 6 | -0.893040000 | -1.580165000 | 0.050089000  |
| 6 | -1.326480000 | 0.779799000  | -0.010056000 |
| 7 | -1.805413000 | -0.479743000 | 0.041846000  |
| 7 | 0.319856000  | -1.116343000 | 0.105357000  |
| 6 | 0.606817000  | 0.824107000  | -1.836966000 |
| 8 | 0.569196000  | 0.800252000  | -2.980380000 |
| 6 | 0.620837000  | 1.068515000  | 1.821604000  |
| 8 | 0.585940000  | 1.198811000  | 2.958708000  |
| 6 | 2.520576000  | 0.643296000  | -0.034506000 |
| 7 | 3.673377000  | 0.452640000  | -0.085102000 |
| 6 | 0.948210000  | 2.748916000  | -0.123583000 |

|    |              |              |              |
|----|--------------|--------------|--------------|
| 7  | 1.227241000  | 3.889079000  | -0.194579000 |
| 6  | 1.645359000  | 5.230956000  | -0.276425000 |
| 1  | 0.782146000  | 5.902532000  | -0.267003000 |
| 1  | 2.288769000  | 5.478742000  | 0.572227000  |
| 1  | 2.205268000  | 5.396346000  | -1.200887000 |
| 6  | 4.988850000  | -0.054745000 | -0.136191000 |
| 1  | 5.412491000  | 0.107274000  | -1.130090000 |
| 1  | 5.615507000  | 0.450373000  | 0.602444000  |
| 1  | 4.967613000  | -1.127206000 | 0.076905000  |
| 25 | 0.657325000  | 0.925829000  | -0.005409000 |
| 6  | 1.356882000  | -2.083338000 | 0.122357000  |
| 6  | 2.187835000  | -2.196433000 | 1.237189000  |
| 6  | 1.570726000  | -2.922176000 | -0.970034000 |
| 6  | 3.210356000  | -3.137258000 | 1.260602000  |
| 1  | 2.010014000  | -1.553996000 | 2.093534000  |
| 6  | 2.600481000  | -3.856212000 | -0.948514000 |
| 1  | 0.911064000  | -2.837581000 | -1.826649000 |
| 6  | 3.426252000  | -3.968836000 | 0.164736000  |
| 1  | 3.831824000  | -3.232032000 | 2.146409000  |
| 1  | 2.751252000  | -4.506692000 | -1.804726000 |
| 1  | 4.222523000  | -4.706072000 | 0.184448000  |
| 6  | -3.202257000 | -0.804382000 | 0.045338000  |
| 6  | -3.696897000 | -1.655857000 | -0.935409000 |
| 6  | -4.044639000 | -0.321527000 | 1.040799000  |
| 6  | -5.040738000 | -2.007727000 | -0.930712000 |
| 1  | -3.015547000 | -2.051480000 | -1.679384000 |
| 6  | -5.387546000 | -0.676217000 | 1.040319000  |
| 1  | -3.646908000 | 0.321328000  | 1.817578000  |
| 6  | -5.890975000 | -1.516526000 | 0.053499000  |
| 1  | -5.422177000 | -2.674378000 | -1.697361000 |
| 1  | -6.040561000 | -0.301242000 | 1.821871000  |
| 1  | -6.939710000 | -1.795227000 | 0.057820000  |
| 8  | -2.314600000 | 1.655350000  | -0.085600000 |
| 6  | -2.038201000 | 3.043759000  | -0.175585000 |
| 1  | -1.489154000 | 3.386256000  | 0.703048000  |

|   |              |             |              |
|---|--------------|-------------|--------------|
| 1 | -1.469018000 | 3.264863000 | -1.079859000 |
| 1 | -3.012710000 | 3.530040000 | -0.220878000 |

**3a**, TE = -1946.751934

|    |              |              |              |
|----|--------------|--------------|--------------|
| 6  | -2.607549000 | 0.035421000  | -1.055262000 |
| 6  | -1.563743000 | 0.014121000  | 1.091815000  |
| 1  | -1.749503000 | 0.012351000  | 2.176467000  |
| 7  | -2.681432000 | 0.030896000  | 0.392632000  |
| 7  | -1.351001000 | 0.020880000  | -1.368177000 |
| 6  | -4.016377000 | 0.045528000  | 0.963591000  |
| 1  | -4.575881000 | -0.828362000 | 0.621434000  |
| 1  | -3.950677000 | 0.039805000  | 2.053423000  |
| 1  | -4.553180000 | 0.936562000  | 0.629349000  |
| 6  | -1.039677000 | 0.021539000  | -2.779857000 |
| 1  | -0.429284000 | 0.897754000  | -3.031027000 |
| 1  | -0.450012000 | -0.867132000 | -3.036432000 |
| 1  | -1.957622000 | 0.034222000  | -3.376206000 |
| 25 | 0.097531000  | -0.002369000 | 0.113634000  |
| 6  | 1.560929000  | -0.013449000 | -1.058108000 |
| 7  | 2.476873000  | -0.019789000 | -1.799080000 |
| 6  | 1.109607000  | -0.021272000 | 1.634218000  |
| 7  | 1.692582000  | -0.032576000 | 2.663537000  |
| 6  | 0.029464000  | -1.872770000 | 0.061260000  |
| 7  | -0.031539000 | -3.045654000 | 0.017447000  |
| 6  | 0.074100000  | 1.869375000  | 0.077709000  |
| 7  | 0.041056000  | 3.043735000  | 0.043812000  |
| 6  | -0.135582000 | 4.436098000  | -0.036350000 |
| 1  | -0.297044000 | 4.858110000  | 0.959897000  |
| 1  | 0.747623000  | 4.909655000  | -0.474488000 |
| 1  | -1.003404000 | 4.671087000  | -0.659538000 |
| 6  | 3.511203000  | -0.016603000 | -2.749571000 |
| 1  | 4.248519000  | 0.755964000  | -2.511238000 |
| 1  | 4.019512000  | -0.985316000 | -2.764968000 |
| 1  | 3.112583000  | 0.181201000  | -3.749737000 |
| 6  | 2.601336000  | -0.050786000 | 3.735422000  |

|   |              |              |              |
|---|--------------|--------------|--------------|
| 1 | 2.484966000  | 0.844227000  | 4.354569000  |
| 1 | 2.432017000  | -0.926787000 | 4.369342000  |
| 1 | 3.633326000  | -0.084727000 | 3.369532000  |
| 6 | -0.237689000 | -4.433179000 | -0.074659000 |
| 1 | 0.638013000  | -4.922406000 | -0.510669000 |
| 1 | -0.414886000 | -4.859163000 | 0.917212000  |
| 1 | -1.106178000 | -4.644605000 | -0.705295000 |

**3b**, TE = -2080.528876

|    |              |              |              |
|----|--------------|--------------|--------------|
| 6  | -1.366645000 | 0.928894000  | -2.195686000 |
| 6  | -1.638472000 | 0.215733000  | 0.091567000  |
| 7  | -2.196783000 | 0.663870000  | -1.058873000 |
| 7  | -0.134763000 | 0.667269000  | -1.900424000 |
| 25 | 0.371011000  | 0.020460000  | -0.010141000 |
| 6  | 2.158302000  | -0.126054000 | -0.487141000 |
| 7  | 3.296607000  | -0.228488000 | -0.778273000 |
| 6  | 0.829343000  | -0.567601000 | 1.641972000  |
| 7  | 1.182908000  | -0.962211000 | 2.713585000  |
| 6  | 0.019478000  | -1.723314000 | -0.587527000 |
| 7  | -0.218139000 | -2.814067000 | -0.956972000 |
| 6  | 0.571307000  | 1.816771000  | 0.483134000  |
| 7  | 0.674061000  | 2.949961000  | 0.778188000  |
| 6  | 0.697796000  | 4.335400000  | 1.016200000  |
| 1  | 0.099100000  | 4.582017000  | 1.897927000  |
| 1  | 1.722727000  | 4.677016000  | 1.186787000  |
| 1  | 0.288944000  | 4.872479000  | 0.155351000  |
| 6  | 4.592550000  | -0.259420000 | -1.321754000 |
| 1  | 5.251739000  | 0.427116000  | -0.781962000 |
| 1  | 5.014548000  | -1.266573000 | -1.252576000 |
| 1  | 4.571770000  | 0.036372000  | -2.375772000 |
| 6  | 2.209453000  | -1.461578000 | 3.554959000  |
| 1  | 1.780998000  | -1.917379000 | 4.451358000  |
| 1  | 2.809804000  | -2.217645000 | 3.036690000  |
| 1  | 2.874601000  | -0.651433000 | 3.873096000  |
| 6  | -0.546637000 | -4.056079000 | -1.528010000 |

|   |              |              |              |
|---|--------------|--------------|--------------|
| 1 | 0.357752000  | -4.579471000 | -1.851711000 |
| 1 | -1.068579000 | -4.685343000 | -0.801247000 |
| 1 | -1.195990000 | -3.912501000 | -2.396674000 |
| 6 | 0.831939000  | 0.902246000  | -2.949217000 |
| 6 | -3.553470000 | 1.181823000  | -1.182453000 |
| 7 | -2.506579000 | -0.150368000 | 1.072980000  |
| 6 | -2.064746000 | -0.272482000 | 2.445267000  |
| 1 | -2.891166000 | 0.013564000  | 3.106147000  |
| 1 | -1.760579000 | -1.298178000 | 2.691287000  |
| 1 | -1.224656000 | 0.391433000  | 2.626021000  |
| 6 | -3.758250000 | -0.845407000 | 0.817560000  |
| 1 | -4.643376000 | -0.251863000 | 1.076683000  |
| 1 | -3.824677000 | -1.143656000 | -0.227143000 |
| 1 | -3.773640000 | -1.757450000 | 1.425817000  |
| 1 | 0.330780000  | 1.279667000  | -3.846325000 |
| 1 | 1.583362000  | 1.631545000  | -2.619889000 |
| 1 | 1.364629000  | -0.024889000 | -3.197553000 |
| 1 | -3.902925000 | 1.558537000  | -0.218115000 |
| 1 | -3.510223000 | 1.996668000  | -1.904143000 |
| 1 | -4.269282000 | 0.443540000  | -1.558353000 |

**3c**, TE = -2061.169314

|    |              |              |              |
|----|--------------|--------------|--------------|
| 6  | -1.954169000 | -0.018462000 | -2.009254000 |
| 6  | -1.753622000 | 0.001489000  | 0.374355000  |
| 7  | -2.544103000 | -0.009009000 | -0.705194000 |
| 7  | -0.665107000 | -0.015461000 | -1.881369000 |
| 25 | 0.199765000  | 0.000407000  | -0.000401000 |
| 6  | 1.912112000  | -0.005902000 | -0.731549000 |
| 7  | 2.998569000  | -0.010802000 | -1.186858000 |
| 6  | 0.946391000  | 0.014651000  | 1.654827000  |
| 7  | 1.478365000  | 0.023507000  | 2.723011000  |
| 6  | 0.130058000  | -1.872046000 | -0.027177000 |
| 7  | 0.065686000  | -3.044643000 | -0.058404000 |
| 6  | 0.126785000  | 1.872112000  | -0.057821000 |
| 7  | 0.060354000  | 3.043927000  | -0.108034000 |
| 6  | -0.139358000 | 4.426830000  | -0.269138000 |



|   |              |              |              |
|---|--------------|--------------|--------------|
| 1 | -0.600639000 | 4.852313000  | 0.626652000  |
| 1 | 0.814479000  | 4.932886000  | -0.442391000 |
| 1 | -0.796097000 | 4.614470000  | -1.123407000 |
| 6 | 4.202652000  | -0.021223000 | -1.912616000 |
| 1 | 4.783233000  | 0.882313000  | -1.704580000 |
| 1 | 4.807514000  | -0.890681000 | -1.638921000 |
| 1 | 3.998576000  | -0.063722000 | -2.987256000 |
| 6 | 2.636639000  | 0.041246000  | 3.538744000  |
| 1 | 3.345619000  | 0.802047000  | 3.194203000  |
| 1 | 2.371333000  | 0.262999000  | 4.575614000  |
| 1 | 3.137395000  | -0.932617000 | 3.517446000  |
| 6 | -0.132777000 | -4.430170000 | -0.197067000 |
| 1 | 0.820934000  | -4.937512000 | -0.367216000 |
| 1 | -0.588981000 | -4.842347000 | 0.707506000  |
| 1 | -0.793466000 | -4.631936000 | -1.045046000 |
| 6 | 0.095218000  | -0.023669000 | -3.110552000 |
| 6 | -3.994827000 | -0.010556000 | -0.618258000 |
| 8 | -2.502423000 | 0.010089000  | 1.479943000  |
| 6 | -1.860791000 | 0.022590000  | 2.744746000  |
| 1 | -1.239164000 | 0.912196000  | 2.855942000  |
| 1 | -2.664803000 | 0.029787000  | 3.482313000  |
| 1 | -1.238945000 | -0.864456000 | 2.873622000  |
| 1 | -4.365554000 | -0.020035000 | -1.641602000 |
| 1 | -4.356299000 | -0.891744000 | -0.080678000 |
| 1 | -4.359193000 | 0.878661000  | -0.096068000 |
| 1 | 0.744722000  | -0.907434000 | -3.154352000 |
| 1 | -0.580595000 | -0.030665000 | -3.971613000 |
| 1 | 0.742984000  | 0.860609000  | -3.167190000 |

**3'a**, TE = -2329.763863

|    |              |              |              |
|----|--------------|--------------|--------------|
| 6  | -1.007156000 | -1.516564000 | -0.175090000 |
| 6  | -1.389534000 | 0.828449000  | 0.084724000  |
| 1  | -2.166897000 | 1.589907000  | 0.228472000  |
| 7  | -1.907782000 | -0.393332000 | -0.065387000 |
| 7  | 0.204657000  | -1.036435000 | -0.181759000 |
| 25 | 0.502400000  | 1.017194000  | 0.100700000  |
| 6  | 2.384988000  | 0.924680000  | 0.159965000  |

|   |              |              |              |
|---|--------------|--------------|--------------|
| 7 | 3.556398000  | 0.844941000  | 0.229926000  |
| 6 | 0.410829000  | 2.824330000  | 0.369269000  |
| 7 | 0.280003000  | 3.985204000  | 0.538286000  |
| 6 | 0.493258000  | 0.690552000  | 1.951024000  |
| 7 | 0.483596000  | 0.474711000  | 3.103995000  |
| 6 | 0.535103000  | 1.254640000  | -1.761231000 |
| 7 | 0.543811000  | 1.389516000  | -2.927788000 |
| 6 | 0.454865000  | 1.440043000  | -4.331086000 |
| 1 | -0.430434000 | 2.005549000  | -4.635359000 |
| 1 | 1.340081000  | 1.924226000  | -4.752305000 |
| 1 | 0.379846000  | 0.428146000  | -4.739216000 |
| 6 | 4.894252000  | 0.404572000  | 0.282511000  |
| 1 | 5.500655000  | 0.944267000  | -0.449836000 |
| 1 | 5.312206000  | 0.584552000  | 1.276690000  |
| 1 | 4.939301000  | -0.667266000 | 0.065088000  |
| 6 | 0.306412000  | 5.375380000  | 0.743551000  |
| 1 | -0.214765000 | 5.893523000  | -0.067135000 |
| 1 | -0.184920000 | 5.633772000  | 1.686472000  |
| 1 | 1.338098000  | 5.740169000  | 0.779854000  |
| 6 | 0.430318000  | 0.131678000  | 4.466984000  |
| 1 | 1.014239000  | 0.840347000  | 5.060652000  |
| 1 | -0.604115000 | 0.146225000  | 4.821238000  |
| 1 | 0.838130000  | -0.871598000 | 4.618353000  |
| 6 | 1.243654000  | -1.990994000 | -0.269817000 |
| 6 | 2.245531000  | -1.847337000 | -1.232374000 |
| 6 | 1.302011000  | -3.082605000 | 0.599341000  |
| 6 | 3.274505000  | -2.775982000 | -1.327930000 |
| 1 | 2.196166000  | -1.005646000 | -1.914580000 |
| 6 | 2.339156000  | -4.003307000 | 0.509774000  |
| 1 | 0.511001000  | -3.198069000 | 1.331866000  |
| 6 | 3.332663000  | -3.857061000 | -0.452596000 |
| 1 | 4.031127000  | -2.661097000 | -2.099320000 |
| 1 | 2.367384000  | -4.846141000 | 1.194298000  |
| 1 | 4.138405000  | -4.580652000 | -0.525284000 |
| 6 | -3.307663000 | -0.655808000 | -0.102249000 |
| 6 | -3.804227000 | -1.844619000 | 0.431053000  |
| 6 | -4.187360000 | 0.262278000  | -0.674188000 |
| 6 | -5.170214000 | -2.091346000 | 0.416918000  |
| 1 | -3.098530000 | -2.562105000 | 0.830697000  |
| 6 | -5.553609000 | 0.009139000  | -0.679538000 |
| 1 | -3.802196000 | 1.164701000  | -1.136681000 |
| 6 | -6.053046000 | -1.166004000 | -0.130982000 |
| 1 | -5.547626000 | -3.017912000 | 0.838166000  |
| 1 | -6.228144000 | 0.729614000  | -1.131438000 |
| 1 | -7.119698000 | -1.364745000 | -0.141309000 |

3'b, TE = -2463.542716

|    |              |              |              |
|----|--------------|--------------|--------------|
| 6  | 0.852991000  | -1.611992000 | -0.266533000 |
| 6  | 1.258104000  | 0.778996000  | -0.248797000 |
| 7  | 1.754304000  | -0.508128000 | -0.277831000 |
| 7  | -0.359550000 | -1.181748000 | -0.065182000 |
| 25 | -0.724739000 | 0.865169000  | 0.091405000  |
| 6  | -2.559552000 | 0.577627000  | 0.232357000  |
| 7  | -3.726897000 | 0.427362000  | 0.276501000  |
| 6  | -1.080895000 | 2.638832000  | 0.212874000  |
| 7  | -1.377339000 | 3.791040000  | 0.303507000  |
| 6  | -0.886096000 | 0.911791000  | -1.774238000 |
| 7  | -0.973424000 | 0.940391000  | -2.945567000 |
| 6  | -0.438653000 | 0.742663000  | 1.943202000  |
| 7  | -0.234723000 | 0.654799000  | 3.096979000  |
| 6  | 0.093500000  | 0.430864000  | 4.446619000  |
| 1  | 0.803971000  | 1.185321000  | 4.796408000  |
| 1  | -0.802831000 | 0.482278000  | 5.070989000  |
| 1  | 0.546664000  | -0.557697000 | 4.563256000  |
| 6  | -5.025720000 | -0.120078000 | 0.300479000  |
| 1  | -5.567994000 | 0.224555000  | 1.185443000  |
| 1  | -5.584394000 | 0.188285000  | -0.587759000 |
| 1  | -4.963787000 | -1.212680000 | 0.321871000  |
| 6  | -2.341747000 | 4.821525000  | 0.433601000  |
| 1  | -1.865744000 | 5.802504000  | 0.359430000  |
| 1  | -3.099484000 | 4.746246000  | -0.353763000 |
| 1  | -2.845010000 | 4.758466000  | 1.404292000  |
| 6  | -1.104809000 | 0.848315000  | -4.342881000 |
| 1  | -1.905218000 | 0.149599000  | -4.602775000 |
| 1  | -1.342942000 | 1.826932000  | -4.768984000 |
| 1  | -0.172438000 | 0.491214000  | -4.789410000 |
| 6  | -1.359591000 | -2.178977000 | -0.043485000 |
| 6  | -2.177864000 | -2.333274000 | 1.078329000  |
| 6  | -1.555554000 | -3.028458000 | -1.134143000 |
| 6  | -3.160886000 | -3.314772000 | 1.109584000  |
| 1  | -2.018649000 | -1.682657000 | 1.931683000  |
| 6  | -2.546592000 | -4.002958000 | -1.105572000 |
| 1  | -0.904666000 | -2.916633000 | -1.994344000 |
| 6  | -3.357289000 | -4.152598000 | 0.014489000  |
| 1  | -3.769788000 | -3.435928000 | 2.001461000  |
| 1  | -2.680843000 | -4.656029000 | -1.963132000 |
| 1  | -4.125499000 | -4.919011000 | 0.039290000  |
| 6  | 3.116346000  | -0.865343000 | -0.052010000 |
| 6  | 3.682374000  | -1.936106000 | -0.743889000 |
| 6  | 3.869422000  | -0.208190000 | 0.921186000  |
| 6  | 4.990960000  | -2.319476000 | -0.484229000 |
| 1  | 3.067700000  | -2.470677000 | -1.457632000 |

|   |             |              |              |
|---|-------------|--------------|--------------|
| 6 | 5.180427000 | -0.595469000 | 1.173706000  |
| 1 | 3.420492000 | 0.602069000  | 1.486223000  |
| 6 | 5.750827000 | -1.649708000 | 0.470610000  |
| 1 | 5.419176000 | -3.154430000 | -1.030231000 |
| 1 | 5.752807000 | -0.076533000 | 1.936632000  |
| 1 | 6.772565000 | -1.954436000 | 0.672028000  |
| 7 | 2.113259000 | 1.744877000  | -0.633902000 |
| 6 | 1.825027000 | 3.142779000  | -0.384979000 |
| 1 | 2.771868000 | 3.668601000  | -0.222708000 |
| 1 | 1.307664000 | 3.607665000  | -1.233273000 |
| 1 | 1.206769000 | 3.247486000  | 0.500429000  |
| 6 | 3.256516000 | 1.555855000  | -1.515919000 |
| 1 | 4.211639000 | 1.629664000  | -0.984460000 |
| 1 | 3.210361000 | 0.586913000  | -2.008508000 |
| 1 | 3.219221000 | 2.338458000  | -2.281283000 |

3'c, TE = -2444.176168

|    |              |              |              |
|----|--------------|--------------|--------------|
| 6  | -1.004847000 | -1.559319000 | -0.149810000 |
| 6  | -1.320604000 | 0.815737000  | 0.040784000  |
| 7  | -1.864171000 | -0.421974000 | -0.077855000 |
| 7  | 0.231860000  | -1.148362000 | -0.180476000 |
| 25 | 0.652865000  | 0.882255000  | 0.059708000  |
| 6  | 2.492391000  | 0.551384000  | 0.124490000  |
| 7  | 3.647904000  | 0.348999000  | 0.212166000  |
| 6  | 1.015610000  | 2.650325000  | 0.282574000  |
| 7  | 1.312597000  | 3.794559000  | 0.421590000  |
| 6  | 0.563037000  | 0.612945000  | 1.915961000  |
| 7  | 0.493872000  | 0.438697000  | 3.074335000  |
| 6  | 0.654663000  | 1.082844000  | -1.805909000 |
| 7  | 0.638511000  | 1.202031000  | -2.974370000 |
| 6  | 0.548955000  | 1.227235000  | -4.378500000 |
| 1  | -0.166610000 | 1.988867000  | -4.700763000 |
| 1  | 1.523363000  | 1.456794000  | -4.818400000 |
| 1  | 0.215693000  | 0.254316000  | -4.750547000 |
| 6  | 4.918807000  | -0.256230000 | 0.297307000  |
| 1  | 5.608272000  | 0.204850000  | -0.414988000 |
| 1  | 5.328582000  | -0.135142000 | 1.303828000  |
| 1  | 4.830729000  | -1.323657000 | 0.072290000  |
| 6  | 2.222764000  | 4.872036000  | 0.538351000  |
| 1  | 3.098457000  | 4.714193000  | -0.100182000 |
| 1  | 1.744836000  | 5.810545000  | 0.245427000  |
| 1  | 2.562756000  | 4.974197000  | 1.573931000  |
| 6  | 0.361659000  | 0.140170000  | 4.442767000  |
| 1  | 0.984951000  | 0.811031000  | 5.040185000  |
| 1  | -0.679290000 | 0.256415000  | 4.756931000  |
| 1  | 0.672329000  | -0.890558000 | 4.634854000  |

|   |              |              |              |
|---|--------------|--------------|--------------|
| 6 | 1.207975000  | -2.167245000 | -0.261859000 |
| 6 | 2.159415000  | -2.145054000 | -1.284472000 |
| 6 | 1.250329000  | -3.209083000 | 0.666961000  |
| 6 | 3.125080000  | -3.139753000 | -1.377449000 |
| 1 | 2.118483000  | -1.345344000 | -2.016239000 |
| 6 | 2.223476000  | -4.197728000 | 0.578590000  |
| 1 | 0.495392000  | -3.233791000 | 1.444927000  |
| 6 | 3.168685000  | -4.169873000 | -0.441603000 |
| 1 | 3.841018000  | -3.118096000 | -2.194576000 |
| 1 | 2.238154000  | -5.001257000 | 1.309300000  |
| 1 | 3.923120000  | -4.946900000 | -0.513569000 |
| 6 | -3.270640000 | -0.685490000 | -0.092404000 |
| 6 | -3.789073000 | -1.619945000 | 0.798550000  |
| 6 | -4.113089000 | -0.067374000 | -1.011861000 |
| 6 | -5.145405000 | -1.919277000 | 0.782529000  |
| 1 | -3.110555000 | -2.122171000 | 1.477754000  |
| 6 | -5.469002000 | -0.369138000 | -1.023647000 |
| 1 | -3.704005000 | 0.643866000  | -1.719489000 |
| 6 | -5.991917000 | -1.292518000 | -0.125011000 |
| 1 | -5.540603000 | -2.651735000 | 1.479364000  |
| 1 | -6.118550000 | 0.114820000  | -1.746346000 |
| 1 | -7.051050000 | -1.528805000 | -0.138898000 |
| 8 | -2.278028000 | 1.725407000  | 0.166388000  |
| 6 | -1.933881000 | 3.092831000  | 0.321867000  |
| 1 | -1.353837000 | 3.446562000  | -0.531471000 |
| 1 | -2.883812000 | 3.625638000  | 0.381705000  |
| 1 | -1.357962000 | 3.245159000  | 1.235434000  |

**4a**, TE = -2060.057548

|   |              |              |              |
|---|--------------|--------------|--------------|
| 6 | 2.333228000  | 0.011469000  | -1.107448000 |
| 6 | 1.463791000  | 0.008150000  | 1.193277000  |
| 1 | 1.554877000  | 0.887548000  | 1.852077000  |
| 7 | 1.046345000  | 0.005965000  | -1.397603000 |
| 1 | 1.562664000  | -0.868237000 | 1.854944000  |
| 6 | -1.185388000 | -0.006489000 | 1.705198000  |
| 6 | -0.012957000 | -1.823156000 | 0.039456000  |
| 6 | -0.033762000 | 1.823339000  | 0.039615000  |
| 7 | -1.721439000 | -0.009224000 | 2.748255000  |
| 7 | 0.228414000  | 2.960340000  | -0.051642000 |
| 7 | 0.262313000  | -2.957019000 | -0.052037000 |
| 6 | 0.885136000  | -4.195807000 | -0.309348000 |
| 1 | 1.784951000  | -4.032939000 | -0.909006000 |
| 1 | 1.165134000  | -4.678376000 | 0.630153000  |
| 1 | 0.205404000  | -4.856049000 | -0.853379000 |
| 6 | -2.310650000 | -0.012558000 | 4.025872000  |
| 1 | -1.820815000 | -0.751207000 | 4.666050000  |

|    |              |              |              |
|----|--------------|--------------|--------------|
| 1  | -2.211706000 | 0.972359000  | 4.490150000  |
| 1  | -3.373110000 | -0.260469000 | 3.953934000  |
| 6  | 0.836290000  | 4.206709000  | -0.308013000 |
| 1  | 1.117137000  | 4.688539000  | 0.631624000  |
| 1  | 1.734017000  | 4.055928000  | -0.913923000 |
| 1  | 0.146114000  | 4.861782000  | -0.845095000 |
| 6  | 0.650567000  | 0.005234000  | -2.781417000 |
| 26 | -0.277754000 | -0.001305000 | 0.128413000  |
| 6  | -1.776478000 | -0.009745000 | -0.949718000 |
| 7  | -2.727519000 | -0.015083000 | -1.634753000 |
| 6  | -3.797741000 | -0.020379000 | -2.548624000 |
| 1  | -4.427663000 | 0.860311000  | -2.398761000 |
| 1  | -3.415648000 | -0.009675000 | -3.573235000 |
| 1  | -4.408949000 | -0.916031000 | -2.410390000 |
| 7  | 2.557734000  | 0.011388000  | 0.222890000  |
| 6  | 3.896672000  | 0.018289000  | 0.745335000  |
| 1  | 4.598602000  | 0.019839000  | -0.089237000 |
| 1  | 4.079661000  | 0.906449000  | 1.369861000  |
| 1  | 4.087294000  | -0.865905000 | 1.373132000  |
| 1  | 0.039512000  | 0.887025000  | -3.030042000 |
| 1  | 1.542106000  | 0.010562000  | -3.416579000 |
| 1  | 0.048826000  | -0.882425000 | -3.031911000 |

**4b**, TE = -5207.549348

|   |              |              |              |
|---|--------------|--------------|--------------|
| 6 | -2.503324000 | 0.002844000  | -1.087499000 |
| 6 | -1.595868000 | 0.005561000  | 1.216244000  |
| 1 | -1.696416000 | -0.870035000 | 1.877872000  |
| 7 | -1.226551000 | -0.000050000 | -1.426693000 |
| 1 | -1.693414000 | 0.884460000  | 1.873976000  |
| 6 | 1.290117000  | 0.000979000  | 1.726567000  |
| 6 | 0.005328000  | 1.950019000  | 0.056255000  |
| 6 | -0.003175000 | -1.949631000 | 0.063954000  |
| 7 | 1.891293000  | 0.001835000  | 2.735589000  |
| 7 | -0.251018000 | -3.090560000 | 0.017869000  |
| 7 | -0.237425000 | 3.091853000  | 0.005843000  |
| 6 | -0.734067000 | 4.401187000  | -0.148648000 |
| 1 | -1.695309000 | 4.368143000  | -0.668047000 |
| 1 | -0.873234000 | 4.867714000  | 0.829545000  |
| 1 | -0.033128000 | 5.004309000  | -0.730735000 |
| 6 | 2.552871000  | 0.005116000  | 3.976487000  |
| 1 | 2.155922000  | 0.798735000  | 4.615792000  |
| 1 | 2.412216000  | -0.953543000 | 4.483698000  |
| 1 | 3.624613000  | 0.172070000  | 3.836751000  |
| 6 | -0.754129000 | -4.397998000 | -0.131753000 |
| 1 | -0.896409000 | -4.859873000 | 0.848200000  |
| 1 | -1.714800000 | -4.362181000 | -0.652023000 |

|    |              |              |              |
|----|--------------|--------------|--------------|
| 1  | -0.055793000 | -5.006982000 | -0.710855000 |
| 6  | -0.892569000 | -0.002932000 | -2.828385000 |
| 6  | 1.780973000  | -0.006378000 | -1.118470000 |
| 7  | 2.677677000  | -0.010294000 | -1.874615000 |
| 6  | 3.673267000  | -0.015798000 | -2.869185000 |
| 1  | 4.306533000  | -0.900856000 | -2.765634000 |
| 1  | 3.212979000  | -0.026184000 | -3.861216000 |
| 1  | 4.300505000  | 0.875243000  | -2.781485000 |
| 7  | -2.697456000 | 0.005357000  | 0.246972000  |
| 6  | -4.029461000 | 0.009173000  | 0.789361000  |
| 44 | 0.235795000  | -0.000234000 | 0.109683000  |
| 1  | -4.743983000 | 0.008376000  | -0.034039000 |
| 1  | -4.207471000 | -0.875118000 | 1.420678000  |
| 1  | -4.204294000 | 0.897323000  | 1.416164000  |
| 1  | -0.299788000 | -0.889316000 | -3.102412000 |
| 1  | -1.812847000 | -0.002049000 | -3.421427000 |
| 1  | -0.296280000 | 0.880215000  | -3.105199000 |

4'a, TE = -2443.081484

|   |              |              |              |
|---|--------------|--------------|--------------|
| 6 | -0.935948000 | -1.371932000 | 0.141017000  |
| 6 | -1.386252000 | 1.051325000  | 0.144064000  |
| 1 | -1.739392000 | 1.529142000  | 1.069154000  |
| 7 | 0.314801000  | -0.939115000 | 0.154243000  |
| 1 | -1.869307000 | 1.591327000  | -0.681132000 |
| 6 | 0.575499000  | 2.874958000  | -0.189126000 |
| 6 | 0.284074000  | 0.752587000  | -1.833145000 |
| 6 | 0.676543000  | 1.083693000  | 1.809860000  |
| 7 | 0.490965000  | 4.039868000  | -0.273505000 |
| 7 | 0.621478000  | 1.039764000  | 2.976215000  |
| 7 | -0.006975000 | 0.495352000  | -2.933597000 |
| 6 | -0.479981000 | 0.004758000  | -4.168185000 |
| 1 | -1.058743000 | -0.906617000 | -3.998856000 |
| 1 | -1.120287000 | 0.749455000  | -4.646232000 |
| 1 | 0.359578000  | -0.220031000 | -4.829815000 |
| 6 | 0.364335000  | 5.438687000  | -0.372778000 |
| 1 | -0.409303000 | 5.695786000  | -1.100744000 |
| 1 | 0.087986000  | 5.861036000  | 0.596655000  |
| 1 | 1.310805000  | 5.881999000  | -0.692843000 |
| 6 | 0.435541000  | 0.791383000  | 4.351836000  |
| 1 | -0.332704000 | 1.457358000  | 4.751570000  |
| 1 | 0.118041000  | -0.244288000 | 4.496388000  |
| 1 | 1.368024000  | 0.959719000  | 4.895558000  |
| 6 | 1.322393000  | -1.918750000 | 0.165350000  |
| 6 | 2.448388000  | -1.781941000 | 0.986356000  |
| 6 | 1.235547000  | -3.064960000 | -0.637427000 |
| 6 | 3.451367000  | -2.745033000 | 0.997988000  |

|    |              |              |              |
|----|--------------|--------------|--------------|
| 1  | 2.516046000  | -0.920499000 | 1.641633000  |
| 6  | 2.239185000  | -4.023517000 | -0.625236000 |
| 1  | 0.351162000  | -3.186030000 | -1.252425000 |
| 6  | 3.359742000  | -3.871937000 | 0.187349000  |
| 1  | 4.301738000  | -2.623262000 | 1.664090000  |
| 1  | 2.145062000  | -4.901122000 | -1.258704000 |
| 1  | 4.141319000  | -4.624868000 | 0.196995000  |
| 26 | 0.634444000  | 1.061617000  | -0.038670000 |
| 6  | 2.467337000  | 0.936155000  | -0.301370000 |
| 7  | 3.612742000  | 0.848448000  | -0.525222000 |
| 6  | 4.941251000  | 0.426623000  | -0.742556000 |
| 1  | 5.622909000  | 0.974014000  | -0.087254000 |
| 1  | 5.015356000  | -0.644232000 | -0.531319000 |
| 1  | 5.228460000  | 0.610069000  | -1.780601000 |
| 7  | -1.833752000 | -0.352027000 | 0.121746000  |
| 6  | -3.209856000 | -0.633739000 | 0.141673000  |
| 6  | -4.157656000 | 0.398366000  | 0.184785000  |
| 6  | -3.680222000 | -1.958473000 | 0.115887000  |
| 6  | -5.520653000 | 0.114031000  | 0.196765000  |
| 1  | -3.834245000 | 1.431005000  | 0.213471000  |
| 6  | -5.038149000 | -2.225517000 | 0.128066000  |
| 1  | -2.944819000 | -2.752548000 | 0.092900000  |
| 6  | -5.977174000 | -1.195097000 | 0.167247000  |
| 1  | -6.229227000 | 0.936800000  | 0.231535000  |
| 1  | -5.370535000 | -3.259690000 | 0.108611000  |
| 1  | -7.040156000 | -1.412593000 | 0.177118000  |

**4'b**, TE = -5590.573778

|   |              |              |              |
|---|--------------|--------------|--------------|
| 6 | -1.139802000 | -1.416358000 | 0.155018000  |
| 6 | -1.445462000 | 1.044523000  | 0.198013000  |
| 1 | -1.766953000 | 1.512537000  | 1.138720000  |
| 7 | 0.145274000  | -1.088662000 | 0.167438000  |
| 1 | -1.915134000 | 1.623191000  | -0.607451000 |
| 6 | 0.782818000  | 2.888664000  | -0.193009000 |
| 6 | 0.260350000  | 0.697436000  | -1.933473000 |
| 6 | 0.761723000  | 1.021062000  | 1.939633000  |
| 7 | 0.808137000  | 4.057427000  | -0.287345000 |
| 7 | 0.732418000  | 1.000470000  | 3.106587000  |
| 7 | -0.061140000 | 0.474890000  | -3.031967000 |
| 6 | -0.552704000 | 0.064166000  | -4.287931000 |
| 1 | -1.348412000 | -0.670554000 | -4.143718000 |
| 1 | -0.952446000 | 0.922583000  | -4.832272000 |
| 1 | 0.251180000  | -0.387209000 | -4.873714000 |
| 6 | 0.811508000  | 5.460138000  | -0.400277000 |
| 1 | 0.181752000  | 5.772894000  | -1.237440000 |
| 1 | 0.424897000  | 5.913646000  | 0.516269000  |



|    |              |              |              |
|----|--------------|--------------|--------------|
| 1  | 1.828229000  | 5.824507000  | -0.570415000 |
| 6  | 0.602095000  | 0.838844000  | 4.500874000  |
| 1  | -0.143094000 | 1.537042000  | 4.889020000  |
| 1  | 0.282000000  | -0.182153000 | 4.722210000  |
| 1  | 1.558657000  | 1.029458000  | 4.992889000  |
| 6  | 1.066740000  | -2.150994000 | 0.167011000  |
| 6  | 2.230990000  | -2.088772000 | 0.941701000  |
| 6  | 0.854475000  | -3.303024000 | -0.603414000 |
| 6  | 3.151448000  | -3.131144000 | 0.940386000  |
| 1  | 2.394358000  | -1.218777000 | 1.568367000  |
| 6  | 1.776672000  | -4.339776000 | -0.604683000 |
| 1  | -0.059021000 | -3.362412000 | -1.183601000 |
| 6  | 2.936599000  | -4.264033000 | 0.162268000  |
| 1  | 4.034597000  | -3.065215000 | 1.570788000  |
| 1  | 1.587804000  | -5.219291000 | -1.213873000 |
| 1  | 3.654330000  | -5.078098000 | 0.161182000  |
| 6  | 2.608915000  | 0.680742000  | -0.318574000 |
| 7  | 3.737496000  | 0.463952000  | -0.544106000 |
| 6  | 5.008942000  | -0.103317000 | -0.771993000 |
| 1  | 5.742645000  | 0.329954000  | -0.088001000 |
| 1  | 4.954886000  | -1.183758000 | -0.609472000 |
| 1  | 5.328530000  | 0.091499000  | -1.798498000 |
| 7  | -1.965178000 | -0.338870000 | 0.148763000  |
| 6  | -3.358008000 | -0.537491000 | 0.162640000  |
| 6  | -4.240814000 | 0.548423000  | 0.241547000  |
| 6  | -3.909552000 | -1.828824000 | 0.091228000  |
| 6  | -5.618638000 | 0.348429000  | 0.243322000  |
| 1  | -3.856370000 | 1.557905000  | 0.306460000  |
| 6  | -5.281335000 | -2.012222000 | 0.094268000  |
| 1  | -3.224427000 | -2.665341000 | 0.041490000  |
| 6  | -6.155174000 | -0.928033000 | 0.168420000  |
| 1  | -6.275022000 | 1.211748000  | 0.306515000  |
| 1  | -5.676251000 | -3.022803000 | 0.039064000  |
| 1  | -7.229556000 | -1.079695000 | 0.170157000  |
| 44 | 0.670524000  | 0.976086000  | -0.024797000 |

**5a**, TE = -2482.282590

|   |              |              |              |
|---|--------------|--------------|--------------|
| 6 | -0.699628000 | -1.182477000 | 0.856066000  |
| 6 | -1.282531000 | 1.254613000  | 0.473642000  |
| 6 | 1.158352000  | 0.710828000  | 0.874668000  |
| 7 | 0.012238000  | 1.596712000  | 0.603470000  |
| 7 | -1.602208000 | -0.045527000 | 0.600291000  |
| 6 | 0.284914000  | 2.988868000  | 0.497948000  |
| 6 | 1.357213000  | 3.567466000  | 1.183786000  |
| 6 | -0.515280000 | 3.817601000  | -0.297853000 |
| 6 | 1.620209000  | 4.929011000  | 1.072306000  |

|    |              |              |              |
|----|--------------|--------------|--------------|
| 1  | 1.974665000  | 2.955828000  | 1.829720000  |
| 6  | -0.245965000 | 5.172982000  | -0.405043000 |
| 1  | -1.365417000 | 3.368631000  | -0.795867000 |
| 6  | 0.826948000  | 5.743351000  | 0.275776000  |
| 1  | 2.451695000  | 5.354022000  | 1.626497000  |
| 1  | -0.882705000 | 5.792163000  | -1.030175000 |
| 1  | 1.035663000  | 6.804518000  | 0.189467000  |
| 6  | -2.990763000 | -0.340160000 | 0.501964000  |
| 6  | -3.545846000 | -1.432197000 | 1.176747000  |
| 6  | -3.839954000 | 0.456535000  | -0.275850000 |
| 6  | -4.902932000 | -1.719315000 | 1.068968000  |
| 1  | -2.919569000 | -2.048968000 | 1.809840000  |
| 6  | -5.190476000 | 0.162528000  | -0.379699000 |
| 1  | -3.411257000 | 1.322908000  | -0.763314000 |
| 6  | -5.736483000 | -0.931091000 | 0.287746000  |
| 1  | -5.308692000 | -2.566548000 | 1.613715000  |
| 1  | -5.825669000 | 0.796896000  | -0.990983000 |
| 1  | -6.794024000 | -1.158528000 | 0.204405000  |
| 1  | 1.221914000  | 0.550725000  | 1.958329000  |
| 1  | 2.052925000  | 1.265413000  | 0.584656000  |
| 1  | -1.237354000 | -2.078001000 | 0.539407000  |
| 1  | -0.550281000 | -1.269646000 | 1.939269000  |
| 26 | 1.126926000  | -1.105373000 | -0.085181000 |
| 6  | 0.299972000  | -0.291345000 | -1.519274000 |
| 7  | -0.235257000 | 0.226687000  | -2.419055000 |
| 6  | 0.841762000  | -2.767014000 | -0.814152000 |
| 7  | 0.609569000  | -3.825406000 | -1.262976000 |
| 6  | 1.830603000  | -1.804953000 | 1.459468000  |
| 7  | 2.248787000  | -2.210735000 | 2.475216000  |
| 6  | 2.785848000  | -0.778277000 | -0.800829000 |
| 7  | 3.840131000  | -0.514349000 | -1.241665000 |
| 6  | 0.250874000  | -5.074996000 | -1.803654000 |
| 1  | 0.737231000  | -5.223528000 | -2.771573000 |
| 1  | 0.558096000  | -5.879967000 | -1.130674000 |
| 1  | -0.832387000 | -5.128234000 | -1.942450000 |
| 6  | -1.019758000 | 0.981455000  | -3.314684000 |
| 1  | -0.767909000 | 0.726106000  | -4.346858000 |
| 1  | -2.078468000 | 0.772388000  | -3.141093000 |
| 1  | -0.837151000 | 2.046785000  | -3.153396000 |
| 6  | 5.077432000  | -0.118333000 | -1.784311000 |
| 1  | 5.895116000  | -0.431787000 | -1.129987000 |
| 1  | 5.222854000  | -0.573351000 | -2.767944000 |
| 1  | 5.111095000  | 0.969345000  | -1.891386000 |
| 6  | 2.729436000  | -2.659011000 | 3.720576000  |
| 1  | 3.800756000  | -2.458663000 | 3.806405000  |
| 1  | 2.208926000  | -2.142522000 | 4.531061000  |

1 2.563359000 -3.734373000 3.824789000

**5b**, TE = -5629.776614

6 0.163092000 -1.366436000 0.909992000  
6 -1.938112000 0.000033000 0.477161000  
6 0.163149000 1.366423000 0.909984000  
7 -1.268982000 1.158697000 0.619145000  
7 -1.269030000 -1.158658000 0.619137000  
6 -2.070067000 2.330447000 0.508434000  
6 -1.742573000 3.494860000 1.209992000  
6 -3.207053000 2.349041000 -0.308286000  
6 -2.523787000 4.639872000 1.091802000  
1 -0.885996000 3.501046000 1.872943000  
6 -3.979231000 3.494462000 -0.422486000  
1 -3.477513000 1.431819000 -0.816087000  
6 -3.644321000 4.653888000 0.272734000  
1 -2.252418000 5.526145000 1.657863000  
1 -4.855523000 3.481555000 -1.064285000  
1 -4.250818000 5.548885000 0.180423000  
6 -2.070162000 -2.330376000 0.508422000  
6 -1.742730000 -3.494802000 1.209985000  
6 -3.207148000 -2.348916000 -0.308300000  
6 -2.523993000 -4.639779000 1.091788000  
1 -0.886157000 -3.501031000 1.872941000  
6 -3.979378000 -3.494301000 -0.422506000  
1 -3.477570000 -1.431678000 -0.816094000  
6 -3.644521000 -4.653745000 0.272711000  
1 -2.252667000 -5.526065000 1.657849000  
1 -4.855670000 -3.481353000 -1.064306000  
1 -4.251058000 -5.548714000 0.180395000  
1 0.309202000 1.312312000 1.995905000  
1 0.395667000 2.389849000 0.611905000  
1 0.395583000 -2.389873000 0.611927000  
1 0.309131000 -1.312313000 1.995914000  
6 0.279239000 0.000003000 -1.610291000  
7 -0.478845000 0.000090000 -2.497270000  
6 2.547245000 -1.482680000 -0.842363000  
7 3.113034000 -2.414254000 -1.277037000  
6 2.541053000 -0.000052000 1.586560000  
7 3.098449000 -0.000048000 2.615390000  
6 2.547362000 1.482513000 -0.842388000  
7 3.113204000 2.414044000 -1.277086000  
6 3.744296000 -3.553597000 -1.810561000  
1 4.213029000 -3.313970000 -2.768925000  
1 4.515257000 -3.913710000 -1.124308000  
1 3.013348000 -4.351636000 -1.966058000

|    |              |              |              |
|----|--------------|--------------|--------------|
| 6  | -1.565497000 | 0.000225000  | -3.395211000 |
| 1  | -1.203715000 | 0.000043000  | -4.426048000 |
| 1  | -2.177397000 | -0.889463000 | -3.227801000 |
| 1  | -2.177024000 | 0.890203000  | -3.227984000 |
| 6  | 3.744625000  | 3.553370000  | -1.810465000 |
| 1  | 4.529949000  | 3.900760000  | -1.134011000 |
| 1  | 4.195216000  | 3.319093000  | -2.778796000 |
| 1  | 3.017700000  | 4.358665000  | -1.946174000 |
| 6  | 3.743108000  | -0.000047000 | 3.867437000  |
| 1  | 4.373403000  | 0.887343000  | 3.966273000  |
| 1  | 3.001073000  | 0.003197000  | 4.669608000  |
| 1  | 4.368392000  | -0.890688000 | 3.968853000  |
| 44 | 1.509187000  | -0.000044000 | -0.076426000 |

6a, TE = -2630.305071

|    |              |              |              |
|----|--------------|--------------|--------------|
| 6  | 1.172117000  | 0.670668000  | 0.578163000  |
| 7  | 0.080273000  | 1.597928000  | 0.275151000  |
| 6  | -1.231371000 | 1.318946000  | 0.148526000  |
| 7  | -1.656270000 | 0.034411000  | 0.185715000  |
| 6  | -0.895475000 | -1.204226000 | 0.171687000  |
| 8  | 2.106983000  | 1.138120000  | 1.193638000  |
| 6  | 0.398483000  | 3.000846000  | 0.292476000  |
| 6  | 1.488957000  | 3.473750000  | -0.432890000 |
| 6  | 1.777025000  | 4.832148000  | -0.453492000 |
| 6  | 0.981322000  | 5.730270000  | 0.249874000  |
| 6  | -0.105941000 | 5.254966000  | 0.974349000  |
| 6  | -0.396870000 | 3.896560000  | 0.997886000  |
| 1  | 2.116067000  | 2.774543000  | -0.974886000 |
| 1  | 2.628321000  | 5.190614000  | -1.024198000 |
| 1  | 1.207559000  | 6.791600000  | 0.233029000  |
| 1  | -0.734822000 | 5.945448000  | 1.527843000  |
| 1  | -1.254571000 | 3.512842000  | 1.537417000  |
| 6  | -3.093095000 | -0.088508000 | 0.141559000  |
| 6  | -3.796710000 | 0.488229000  | -0.908873000 |
| 6  | -5.182043000 | 0.397687000  | -0.956638000 |
| 6  | -5.873548000 | -0.272355000 | 0.046552000  |
| 6  | -5.167448000 | -0.846189000 | 1.097946000  |
| 6  | -3.781529000 | -0.757633000 | 1.147425000  |
| 1  | -3.245454000 | 1.035008000  | -1.665838000 |
| 1  | -5.722899000 | 0.858066000  | -1.777731000 |
| 1  | -6.956123000 | -0.342170000 | 0.012221000  |
| 1  | -5.698514000 | -1.365654000 | 1.889615000  |
| 1  | -3.230836000 | -1.207692000 | 1.963940000  |
| 8  | -1.537142000 | -2.229773000 | 0.281587000  |
| 26 | 1.056256000  | -1.160996000 | -0.114077000 |
| 6  | 0.894173000  | -2.916395000 | -0.745686000 |

|   |              |              |              |
|---|--------------|--------------|--------------|
| 6 | 1.180478000  | -1.683571000 | 1.651121000  |
| 6 | 2.907935000  | -1.084628000 | -0.326151000 |
| 6 | 0.696917000  | -0.420464000 | -1.763462000 |
| 7 | 4.066772000  | -0.982356000 | -0.419850000 |
| 7 | 0.734145000  | -4.007794000 | -1.125211000 |
| 7 | 1.230452000  | -1.968502000 | 2.780861000  |
| 7 | 0.427536000  | 0.097182000  | -2.774927000 |
| 6 | -0.016073000 | 0.836431000  | -3.890962000 |
| 1 | -0.895805000 | 0.357935000  | -4.327771000 |
| 1 | -0.279801000 | 1.848960000  | -3.575585000 |
| 1 | 0.771885000  | 0.888626000  | -4.645843000 |
| 6 | 5.443697000  | -0.681352000 | -0.395034000 |
| 1 | 5.805776000  | -0.493449000 | -1.408433000 |
| 1 | 5.609307000  | 0.208813000  | 0.216585000  |
| 1 | 6.003351000  | -1.518187000 | 0.029187000  |
| 6 | 1.237588000  | -2.202061000 | 4.169903000  |
| 1 | 0.246559000  | -2.525119000 | 4.497180000  |
| 1 | 1.964061000  | -2.979707000 | 4.417073000  |
| 1 | 1.505880000  | -1.283004000 | 4.696213000  |
| 6 | 0.276950000  | -5.291565000 | -1.487761000 |
| 1 | 0.877015000  | -6.058036000 | -0.992162000 |
| 1 | -0.767732000 | -5.399007000 | -1.186106000 |
| 1 | 0.355793000  | -5.426711000 | -2.568823000 |

**6b**, TE = -5777.794210

|   |              |              |              |
|---|--------------|--------------|--------------|
| 6 | 0.453943000  | 1.277079000  | 0.647254000  |
| 7 | -0.974384000 | 1.392753000  | 0.328710000  |
| 6 | -1.886737000 | 0.410793000  | 0.191068000  |
| 7 | -1.522133000 | -0.894048000 | 0.230814000  |
| 6 | -0.204981000 | -1.515449000 | 0.217165000  |
| 8 | 0.927506000  | 2.182931000  | 1.299282000  |
| 6 | -1.525838000 | 2.721604000  | 0.337258000  |
| 6 | -0.896636000 | 3.736364000  | -0.379472000 |
| 6 | -1.444629000 | 5.012025000  | -0.411208000 |
| 6 | -2.624331000 | 5.287330000  | 0.271973000  |
| 6 | -3.249728000 | 4.272543000  | 0.987649000  |
| 6 | -2.703993000 | 2.995389000  | 1.022707000  |
| 1 | 0.027269000  | 3.526427000  | -0.907004000 |
| 1 | -0.946958000 | 5.795012000  | -0.975268000 |
| 1 | -3.051976000 | 6.284483000  | 0.246503000  |
| 1 | -4.170677000 | 4.474418000  | 1.525903000  |
| 1 | -3.191735000 | 2.187515000  | 1.555028000  |
| 6 | -2.652239000 | -1.790501000 | 0.185511000  |
| 6 | -3.555849000 | -1.698577000 | -0.866411000 |
| 6 | -4.659014000 | -2.540905000 | -0.917696000 |
| 6 | -4.865777000 | -3.483704000 | 0.083318000  |

|    |              |              |              |
|----|--------------|--------------|--------------|
| 6  | -3.962328000 | -3.571401000 | 1.136406000  |
| 6  | -2.857668000 | -2.729814000 | 1.189936000  |
| 1  | -3.398163000 | -0.936424000 | -1.621502000 |
| 1  | -5.362604000 | -2.455686000 | -1.740126000 |
| 1  | -5.728301000 | -4.141472000 | 0.046142000  |
| 1  | -4.118266000 | -4.298883000 | 1.927012000  |
| 1  | -2.152430000 | -2.800644000 | 2.008347000  |
| 8  | -0.174626000 | -2.722344000 | 0.350389000  |
| 6  | 2.344761000  | -2.004823000 | -0.837535000 |
| 6  | 1.988630000  | -0.742810000 | 1.733012000  |
| 6  | 3.038408000  | 0.880644000  | -0.373276000 |
| 6  | 0.678732000  | 0.113255000  | -1.869199000 |
| 7  | 3.893748000  | 1.671068000  | -0.458164000 |
| 7  | 2.749832000  | -3.031375000 | -1.216916000 |
| 7  | 2.236941000  | -0.953807000 | 2.851787000  |
| 7  | 0.127837000  | 0.403032000  | -2.855966000 |
| 6  | -0.678857000 | 0.778526000  | -3.950142000 |
| 1  | -1.202131000 | -0.097048000 | -4.341206000 |
| 1  | -1.413846000 | 1.518013000  | -3.623268000 |
| 1  | -0.061511000 | 1.208523000  | -4.742125000 |
| 6  | 4.819094000  | 2.734270000  | -0.448141000 |
| 1  | 4.973199000  | 3.106169000  | -1.463731000 |
| 1  | 4.436502000  | 3.545085000  | 0.176469000  |
| 1  | 5.777189000  | 2.394219000  | -0.048190000 |
| 6  | 2.446715000  | -1.157070000 | 4.229982000  |
| 1  | 1.866774000  | -2.018242000 | 4.569555000  |
| 1  | 3.505724000  | -1.341094000 | 4.424804000  |
| 1  | 2.129661000  | -0.270579000 | 4.784022000  |
| 6  | 3.017813000  | -4.365656000 | -1.585812000 |
| 1  | 3.931884000  | -4.713144000 | -1.099034000 |
| 1  | 2.181813000  | -4.998790000 | -1.278963000 |
| 1  | 3.145657000  | -4.436506000 | -2.668329000 |
| 44 | 1.479546000  | -0.341911000 | -0.129098000 |

Cartesian coordinates for the triplet state optimized geometries of **1a-6b**, along with their total energies (in hartrees) including zero point vibrational correction in gas phase.

**1a**, TE = -1869.391080

|   |             |              |              |
|---|-------------|--------------|--------------|
| 6 | 2.053051000 | 0.915858000  | -0.000039000 |
| 6 | 1.178788000 | -1.207588000 | 0.000336000  |
| 1 | 1.412318000 | -2.270051000 | 0.000442000  |
| 7 | 2.307517000 | -0.390116000 | 0.000232000  |
| 7 | 0.889878000 | 1.434246000  | -0.000208000 |
| 6 | 3.668792000 | -0.897929000 | 0.000339000  |
| 1 | 3.838562000 | -1.508191000 | 0.891229000  |

|    |              |              |              |
|----|--------------|--------------|--------------|
| 1  | 3.838697000  | -1.508254000 | -0.890484000 |
| 1  | 4.367420000  | -0.060871000 | 0.000365000  |
| 6  | 0.643687000  | 2.859925000  | -0.000469000 |
| 1  | 0.064067000  | 3.140850000  | -0.884994000 |
| 1  | 0.063714000  | 3.141107000  | 0.883740000  |
| 1  | 1.579825000  | 3.423937000  | -0.000363000 |
| 25 | -0.543576000 | -0.127299000 | -0.000005000 |
| 6  | -0.363900000 | -0.226310000 | -1.837776000 |
| 8  | -0.194057000 | -0.335568000 | -2.959369000 |
| 6  | -1.566741000 | -1.603137000 | 0.000254000  |
| 8  | -2.190056000 | -2.563592000 | 0.000411000  |
| 6  | -1.971042000 | 1.004960000  | -0.000396000 |
| 8  | -2.874876000 | 1.707506000  | -0.000608000 |
| 6  | -0.364218000 | -0.225459000 | 1.837846000  |
| 8  | -0.194442000 | -0.334205000 | 2.959498000  |

**1b**, TE = -2003.161346

|    |              |              |              |
|----|--------------|--------------|--------------|
| 6  | -0.244170000 | 2.312274000  | 0.109847000  |
| 6  | -1.229116000 | 0.213434000  | 0.190267000  |
| 7  | -1.376120000 | 1.626915000  | 0.157010000  |
| 7  | 0.923597000  | 1.811141000  | 0.037425000  |
| 25 | 0.773491000  | -0.300176000 | -0.001195000 |
| 6  | 0.699552000  | -0.314044000 | 1.846505000  |
| 8  | 0.578951000  | -0.315225000 | 2.980624000  |
| 6  | 0.562311000  | -2.082031000 | -0.073778000 |
| 8  | 0.472250000  | -3.223774000 | -0.136659000 |
| 6  | 2.575161000  | -0.489504000 | -0.151108000 |
| 8  | 3.708608000  | -0.617631000 | -0.252065000 |
| 6  | 0.422152000  | -0.147197000 | -1.803256000 |
| 8  | 0.148585000  | -0.027736000 | -2.905354000 |
| 6  | 2.130699000  | 2.603096000  | -0.059677000 |
| 6  | -2.653193000 | 2.306190000  | 0.326420000  |
| 7  | -2.450791000 | -0.460991000 | 0.104495000  |
| 6  | -2.935906000 | -0.728251000 | -1.242420000 |
| 1  | -3.992045000 | -1.014861000 | -1.205193000 |
| 1  | -2.843886000 | 0.167508000  | -1.860721000 |
| 1  | -2.375179000 | -1.540030000 | -1.734419000 |
| 6  | -2.591577000 | -1.608226000 | 0.979839000  |
| 1  | -3.646314000 | -1.898819000 | 1.024999000  |
| 1  | -2.015391000 | -2.482934000 | 0.640912000  |
| 1  | -2.266618000 | -1.346042000 | 1.988020000  |
| 1  | 1.904850000  | 3.671703000  | -0.021332000 |
| 1  | 2.808905000  | 2.357847000  | 0.762875000  |
| 1  | 2.650405000  | 2.387986000  | -0.998775000 |
| 1  | -3.145805000 | 1.948670000  | 1.232204000  |
| 1  | -2.464631000 | 3.377327000  | 0.404683000  |

1 -3.310981000 2.117050000 -0.524094000

**1c**, TE = -1983.789662

6 -0.913970000 -2.126804000 -0.011762000  
6 -1.407142000 0.114775000 0.276675000  
7 -1.863606000 -1.215608000 0.113706000  
7 0.332277000 -1.888365000 -0.137724000  
25 0.650681000 0.201849000 -0.025880000  
6 0.079090000 0.371595000 -1.770169000  
8 -0.358317000 0.486666000 -2.817620000  
6 0.884125000 1.975549000 0.141314000  
8 1.092567000 3.096939000 0.261857000  
6 2.417023000 -0.002890000 -0.406867000  
8 3.522800000 -0.120117000 -0.678122000  
6 0.802743000 0.002234000 1.812932000  
8 0.837438000 -0.112976000 2.945347000  
6 1.344246000 -2.921190000 -0.066523000  
6 -3.274381000 -1.573012000 0.069526000  
8 -2.435128000 0.949171000 -0.038379000  
6 -2.273040000 2.304832000 0.317948000  
1 -1.936989000 2.401587000 1.355582000  
1 -1.558669000 2.803156000 -0.344548000  
1 -3.250850000 2.774112000 0.203833000  
1 -3.750437000 -1.136387000 -0.809813000  
1 -3.352607000 -2.659359000 0.030908000  
1 -3.778224000 -1.200009000 0.963469000  
1 0.894624000 -3.915976000 -0.117861000  
1 2.046576000 -2.811280000 -0.896882000  
1 1.911798000 -2.842262000 0.867350000

**1'a**, TE = -2252.401539

6 -0.651682000 0.940183000 0.064456000  
6 -1.162991000 -1.302120000 0.087508000  
1 -1.956886000 -2.027513000 0.243057000  
7 -1.615974000 0.018523000 0.081648000  
7 0.605887000 0.700595000 0.098125000  
25 0.856537000 -1.430883000 0.000693000  
6 0.771797000 -1.482705000 1.849829000  
8 0.652687000 -1.519534000 2.981720000  
6 0.762587000 -3.220150000 -0.076875000  
8 0.660191000 -4.359107000 -0.122529000  
6 2.681083000 -1.447014000 -0.113995000  
8 3.818154000 -1.525558000 -0.202965000  
6 0.608385000 -1.311831000 -1.832230000  
8 0.390664000 -1.249760000 -2.947789000  
6 1.558668000 1.736975000 0.012428000



|   |              |              |              |
|---|--------------|--------------|--------------|
| 6 | 2.750336000  | 1.640227000  | 0.729785000  |
| 6 | 1.326250000  | 2.864518000  | -0.781052000 |
| 6 | 3.693660000  | 2.656289000  | 0.654931000  |
| 1 | 2.924049000  | 0.775536000  | 1.359479000  |
| 6 | 2.272234000  | 3.877291000  | -0.846486000 |
| 1 | 0.405554000  | 2.931517000  | -1.352029000 |
| 6 | 3.461631000  | 3.778702000  | -0.131912000 |
| 1 | 4.615199000  | 2.569377000  | 1.221143000  |
| 1 | 2.081308000  | 4.745748000  | -1.468756000 |
| 1 | 4.202398000  | 4.568750000  | -0.190460000 |
| 6 | -2.982993000 | 0.420873000  | 0.084714000  |
| 6 | -3.935878000 | -0.366895000 | -0.553847000 |
| 6 | -3.358509000 | 1.597714000  | 0.728579000  |
| 6 | -5.267197000 | 0.028927000  | -0.545008000 |
| 1 | -3.631071000 | -1.269670000 | -1.070869000 |
| 6 | -4.689590000 | 1.990444000  | 0.718013000  |
| 1 | -2.609864000 | 2.191752000  | 1.242662000  |
| 6 | -5.649476000 | 1.206901000  | 0.086224000  |
| 1 | -6.007861000 | -0.584930000 | -1.046618000 |
| 1 | -4.978880000 | 2.907342000  | 1.220591000  |
| 1 | -6.690233000 | 1.512028000  | 0.088223000  |

**1'b**, TE = -2386.170878

|    |              |              |              |
|----|--------------|--------------|--------------|
| 6  | -0.188084000 | 1.258186000  | -0.017920000 |
| 6  | -1.117157000 | -0.879078000 | -0.151597000 |
| 7  | -1.299717000 | 0.540760000  | -0.089838000 |
| 7  | 1.003306000  | 0.788217000  | -0.015840000 |
| 25 | 0.869359000  | -1.335924000 | 0.230884000  |
| 6  | 0.383661000  | -1.078809000 | 2.004675000  |
| 8  | 0.016923000  | -0.948504000 | 3.074777000  |
| 6  | 0.678078000  | -3.109427000 | 0.419965000  |
| 8  | 0.607711000  | -4.245280000 | 0.558213000  |
| 6  | 2.649323000  | -1.529482000 | 0.584813000  |
| 8  | 3.752033000  | -1.710403000 | 0.826550000  |
| 6  | 0.955067000  | -1.498786000 | -1.601251000 |
| 8  | 0.941265000  | -1.602181000 | -2.738167000 |
| 6  | 2.124423000  | 1.640110000  | -0.093624000 |
| 6  | 3.255689000  | 1.241505000  | -0.805131000 |
| 6  | 2.117840000  | 2.890470000  | 0.533821000  |
| 6  | 4.358840000  | 2.080842000  | -0.890158000 |
| 1  | 3.260292000  | 0.281460000  | -1.307754000 |
| 6  | 3.222500000  | 3.724179000  | 0.439619000  |
| 1  | 1.244326000  | 3.191883000  | 1.102944000  |
| 6  | 4.350348000  | 3.324900000  | -0.270225000 |
| 1  | 5.229866000  | 1.757976000  | -1.451096000 |
| 1  | 3.204271000  | 4.690220000  | 0.934112000  |

|   |              |              |              |
|---|--------------|--------------|--------------|
| 1 | 5.215215000  | 3.976058000  | -0.336338000 |
| 6 | -2.554223000 | 1.211525000  | 0.057163000  |
| 6 | -2.755171000 | 2.435175000  | -0.576847000 |
| 6 | -3.556967000 | 0.654585000  | 0.847204000  |
| 6 | -3.954847000 | 3.113523000  | -0.401726000 |
| 1 | -1.971921000 | 2.847446000  | -1.204985000 |
| 6 | -4.757160000 | 1.334589000  | 1.002680000  |
| 1 | -3.386889000 | -0.296001000 | 1.336452000  |
| 6 | -4.961329000 | 2.563906000  | 0.383571000  |
| 1 | -4.104559000 | 4.069800000  | -0.891894000 |
| 1 | -5.536159000 | 0.903161000  | 1.622751000  |
| 1 | -5.901696000 | 3.089342000  | 0.511419000  |
| 7 | -2.199578000 | -1.533422000 | -0.709666000 |
| 6 | -2.642031000 | -1.182554000 | -2.052518000 |
| 1 | -3.695542000 | -1.452169000 | -2.175028000 |
| 1 | -2.547663000 | -0.109105000 | -2.217779000 |
| 1 | -2.055557000 | -1.706581000 | -2.822854000 |
| 6 | -2.360386000 | -2.934835000 | -0.406697000 |
| 1 | -3.399741000 | -3.226241000 | -0.589688000 |
| 1 | -1.716959000 | -3.581066000 | -1.024707000 |
| 1 | -2.133270000 | -3.119176000 | 0.643877000  |

**1'**c, TE = -2366.797362

|    |              |              |              |
|----|--------------|--------------|--------------|
| 6  | 0.379891000  | 1.191550000  | -0.048628000 |
| 6  | 1.190017000  | -0.985141000 | -0.008230000 |
| 7  | 1.451418000  | 0.411168000  | -0.041107000 |
| 7  | -0.836650000 | 0.802415000  | -0.141030000 |
| 25 | -0.845301000 | -1.333390000 | 0.077902000  |
| 6  | -0.680974000 | -1.494208000 | -1.752185000 |
| 8  | -0.507449000 | -1.588504000 | -2.874501000 |
| 6  | -0.752616000 | -3.109630000 | 0.317578000  |
| 8  | -0.740524000 | -4.241966000 | 0.494591000  |
| 6  | -2.666609000 | -1.457642000 | 0.134735000  |
| 8  | -3.799289000 | -1.604031000 | 0.173314000  |
| 6  | -0.661068000 | -1.067453000 | 1.910209000  |
| 8  | -0.494315000 | -0.921437000 | 3.025923000  |
| 6  | -1.916738000 | 1.708125000  | -0.085225000 |
| 6  | -3.030997000 | 1.497999000  | -0.897021000 |
| 6  | -1.889397000 | 2.815710000  | 0.767285000  |
| 6  | -4.101919000 | 2.380254000  | -0.854178000 |
| 1  | -3.044516000 | 0.651474000  | -1.574102000 |
| 6  | -2.961898000 | 3.695740000  | 0.799851000  |
| 1  | -1.025890000 | 2.973121000  | 1.405720000  |
| 6  | -4.074970000 | 3.482050000  | -0.006535000 |
| 1  | -4.961261000 | 2.206233000  | -1.493471000 |
| 1  | -2.929403000 | 4.550697000  | 1.467655000  |

|   |              |              |              |
|---|--------------|--------------|--------------|
| 1 | -4.914274000 | 4.168245000  | 0.026374000  |
| 6 | 2.754062000  | 1.000846000  | -0.031463000 |
| 6 | 3.740671000  | 0.488514000  | 0.805078000  |
| 6 | 3.015203000  | 2.100092000  | -0.842135000 |
| 6 | 4.992229000  | 1.086629000  | 0.827579000  |
| 1 | 3.519623000  | -0.367017000 | 1.432318000  |
| 6 | 4.267125000  | 2.701684000  | -0.800156000 |
| 1 | 2.241931000  | 2.473071000  | -1.505706000 |
| 6 | 5.259645000  | 2.195234000  | 0.029898000  |
| 1 | 5.762276000  | 0.688262000  | 1.479964000  |
| 1 | 4.468204000  | 3.561503000  | -1.430445000 |
| 1 | 6.239629000  | 2.659702000  | 0.053817000  |
| 8 | 2.222023000  | -1.624020000 | -0.616585000 |
| 6 | 2.304896000  | -3.019918000 | -0.429965000 |
| 1 | 2.232037000  | -3.283777000 | 0.630519000  |
| 1 | 1.520369000  | -3.540638000 | -0.988352000 |
| 1 | 3.277526000  | -3.324143000 | -0.817780000 |

**2a**, TE = -1908.046290

|    |              |              |              |
|----|--------------|--------------|--------------|
| 6  | -2.522565000 | -0.940945000 | 0.006475000  |
| 6  | -1.593759000 | 1.166813000  | -0.001386000 |
| 1  | -1.821037000 | 2.232820000  | -0.006955000 |
| 7  | -2.742386000 | 0.372864000  | 0.001783000  |
| 7  | -1.373732000 | -1.490284000 | 0.007465000  |
| 6  | -4.090403000 | 0.907247000  | -0.001542000 |
| 1  | -4.249384000 | 1.528360000  | 0.884952000  |
| 1  | -4.249759000 | 1.517210000  | -0.895705000 |
| 1  | -4.808400000 | 0.086077000  | 0.003793000  |
| 6  | -1.166673000 | -2.916975000 | 0.017001000  |
| 1  | -0.588278000 | -3.219216000 | -0.862518000 |
| 1  | -0.596476000 | -3.208897000 | 0.905461000  |
| 1  | -2.115723000 | -3.461306000 | 0.015856000  |
| 25 | 0.102757000  | 0.051731000  | 0.000616000  |
| 6  | -0.016863000 | 0.182642000  | -1.826115000 |
| 8  | -0.121669000 | 0.341156000  | -2.956595000 |
| 6  | -0.011939000 | 0.193481000  | 1.826931000  |
| 8  | -0.113480000 | 0.358668000  | 2.956737000  |
| 6  | 1.199668000  | 1.526373000  | -0.005142000 |
| 7  | 1.870595000  | 2.491503000  | -0.008784000 |
| 6  | 1.518974000  | -1.166067000 | 0.002033000  |
| 7  | 2.409292000  | -1.933968000 | 0.002261000  |
| 6  | 2.635948000  | 3.671068000  | -0.013280000 |
| 1  | 3.703615000  | 3.433409000  | -0.020081000 |
| 1  | 2.406696000  | 4.268912000  | -0.899933000 |
| 1  | 2.417863000  | 4.268426000  | 0.876506000  |
| 6  | 3.500383000  | -2.821338000 | 0.002195000  |

|   |             |              |              |
|---|-------------|--------------|--------------|
| 1 | 3.159185000 | -3.843348000 | 0.189905000  |
| 1 | 4.010490000 | -2.796610000 | -0.964918000 |
| 1 | 4.215173000 | -2.544649000 | 0.782396000  |

**2b, TE = -2041.816013**

|    |              |              |              |
|----|--------------|--------------|--------------|
| 6  | -0.801016000 | -2.563021000 | 0.016691000  |
| 6  | -1.551420000 | -0.369048000 | 0.062872000  |
| 7  | -1.852784000 | -1.754907000 | 0.024847000  |
| 7  | 0.416894000  | -2.189897000 | 0.020830000  |
| 25 | 0.485423000  | -0.059660000 | 0.013669000  |
| 6  | 0.270523000  | -0.070044000 | -1.805877000 |
| 8  | 0.073587000  | -0.054482000 | -2.936265000 |
| 6  | 0.334042000  | -0.029608000 | 1.841337000  |
| 8  | 0.169935000  | 0.016526000  | 2.975783000  |
| 6  | 0.442548000  | 1.777364000  | -0.012242000 |
| 7  | 0.456556000  | 2.954336000  | -0.037950000 |
| 6  | 2.351460000  | -0.061074000 | -0.019405000 |
| 7  | 3.526642000  | -0.054886000 | -0.039796000 |
| 6  | 0.280983000  | 4.349813000  | -0.051909000 |
| 1  | 0.898448000  | 4.819174000  | 0.718972000  |
| 1  | 0.568699000  | 4.759419000  | -1.024171000 |
| 1  | -0.766891000 | 4.604164000  | 0.137869000  |
| 6  | 4.932764000  | -0.027209000 | -0.058699000 |
| 1  | 5.334584000  | -1.026981000 | 0.128793000  |
| 1  | 5.293305000  | 0.316440000  | -1.032304000 |
| 1  | 5.309598000  | 0.649592000  | 0.713309000  |
| 6  | 1.531555000  | -3.104528000 | 0.019507000  |
| 6  | -3.203560000 | -2.292604000 | 0.031128000  |
| 7  | -2.706014000 | 0.443459000  | 0.038803000  |
| 6  | -2.928057000 | 1.125499000  | -1.225428000 |
| 1  | -2.905947000 | 0.406039000  | -2.047115000 |
| 1  | -3.912130000 | 1.607808000  | -1.217209000 |
| 1  | -2.165021000 | 1.896206000  | -1.430201000 |
| 6  | -2.815796000 | 1.347187000  | 1.168880000  |
| 1  | -3.797265000 | 1.834322000  | 1.154347000  |
| 1  | -2.723332000 | 0.788549000  | 2.102503000  |
| 1  | -2.040274000 | 2.132483000  | 1.164939000  |
| 1  | -3.139761000 | -3.381464000 | 0.046150000  |
| 1  | -3.746962000 | -1.942735000 | 0.911069000  |
| 1  | -3.750543000 | -1.972014000 | -0.858398000 |
| 1  | 2.157030000  | -2.939099000 | 0.903322000  |
| 1  | 1.194598000  | -4.145375000 | 0.020031000  |
| 1  | 2.155684000  | -2.939280000 | -0.865393000 |

**2c**, TE = -2022.444931

|    |              |              |              |
|----|--------------|--------------|--------------|
| 6  | -1.643357000 | -2.134260000 | 0.088700000  |
| 6  | -1.769602000 | 0.179727000  | 0.161012000  |
| 7  | -2.430304000 | -1.069592000 | 0.069437000  |
| 7  | -0.368497000 | -2.115566000 | 0.050624000  |
| 25 | 0.285647000  | -0.086930000 | 0.034645000  |
| 6  | -0.071717000 | 0.079063000  | -1.754057000 |
| 8  | -0.365533000 | 0.237975000  | -2.851188000 |
| 6  | 0.315709000  | -0.110295000 | 1.874496000  |
| 8  | 0.298835000  | -0.071608000 | 3.019104000  |
| 6  | 0.832116000  | 1.668692000  | 0.103350000  |
| 7  | 1.245983000  | 2.768644000  | 0.166863000  |
| 6  | 2.054330000  | -0.638416000 | -0.185919000 |
| 7  | 3.166919000  | -0.978789000 | -0.349817000 |
| 6  | 1.611903000  | 4.122998000  | 0.262916000  |
| 1  | 2.009510000  | 4.338926000  | 1.258555000  |
| 1  | 2.379153000  | 4.364351000  | -0.478038000 |
| 1  | 0.744418000  | 4.767125000  | 0.087439000  |
| 6  | 4.498589000  | -1.382240000 | -0.556721000 |
| 1  | 4.594454000  | -2.461784000 | -0.410400000 |
| 1  | 4.815677000  | -1.138563000 | -1.574534000 |
| 1  | 5.162765000  | -0.875115000 | 0.148632000  |
| 6  | 0.440047000  | -3.283606000 | 0.302594000  |
| 6  | -3.872517000 | -1.201409000 | -0.059311000 |
| 8  | -2.636910000 | 1.130686000  | -0.316029000 |
| 6  | -2.268848000 | 2.465391000  | -0.078394000 |
| 1  | -2.006654000 | 2.620551000  | 0.975119000  |
| 1  | -1.419462000 | 2.758105000  | -0.705465000 |
| 1  | -3.133991000 | 3.079572000  | -0.335781000 |
| 1  | -4.126942000 | -2.260805000 | -0.018925000 |
| 1  | -4.368029000 | -0.673712000 | 0.759096000  |
| 1  | -4.213652000 | -0.775780000 | -1.004831000 |
| 1  | 0.954802000  | -3.196370000 | 1.267111000  |
| 1  | -0.166974000 | -4.193680000 | 0.313405000  |
| 1  | 1.204005000  | -3.382752000 | -0.474368000 |

**2'a**, TE = -2291.059487

|    |              |              |              |
|----|--------------|--------------|--------------|
| 6  | -1.051941000 | -1.118033000 | 0.050398000  |
| 6  | -1.277317000 | 1.177408000  | 0.093400000  |
| 1  | -1.990486000 | 1.990820000  | -0.026673000 |
| 7  | -1.892069000 | -0.078301000 | 0.041636000  |
| 7  | 0.225419000  | -1.035795000 | 0.112317000  |
| 25 | 0.735672000  | 1.063205000  | -0.001015000 |
| 6  | 0.458329000  | 1.062957000  | -1.816478000 |
| 8  | 0.234278000  | 1.120437000  | -2.938104000 |
| 6  | 0.750976000  | 1.188718000  | 1.834691000  |

|   |              |              |              |
|---|--------------|--------------|--------------|
| 8 | 0.710809000  | 1.326957000  | 2.970658000  |
| 6 | 0.915001000  | 2.891257000  | -0.074428000 |
| 7 | 0.990189000  | 4.062185000  | -0.118498000 |
| 6 | 2.574729000  | 0.754273000  | -0.191535000 |
| 7 | 3.723355000  | 0.573713000  | -0.351286000 |
| 6 | 1.065148000  | 5.466181000  | -0.169054000 |
| 1 | 2.108913000  | 5.791954000  | -0.151780000 |
| 1 | 0.598260000  | 5.836870000  | -1.085622000 |
| 1 | 0.548052000  | 5.903986000  | 0.689124000  |
| 6 | 5.057782000  | 0.172659000  | -0.551477000 |
| 1 | 5.141142000  | -0.910956000 | -0.426267000 |
| 1 | 5.384630000  | 0.437130000  | -1.560569000 |
| 1 | 5.714520000  | 0.665585000  | 0.170112000  |
| 6 | 1.041632000  | -2.176771000 | 0.146787000  |
| 6 | 2.191591000  | -2.179949000 | 0.940172000  |
| 6 | 0.730541000  | -3.320133000 | -0.597970000 |
| 6 | 3.006580000  | -3.302911000 | 0.988338000  |
| 1 | 2.421022000  | -1.302290000 | 1.532883000  |
| 6 | 1.550764000  | -4.438083000 | -0.544857000 |
| 1 | -0.154361000 | -3.315341000 | -1.226268000 |
| 6 | 2.695404000  | -4.437817000 | 0.245721000  |
| 1 | 3.886352000  | -3.295746000 | 1.624941000  |
| 1 | 1.295025000  | -5.315295000 | -1.131082000 |
| 1 | 3.334928000  | -5.313140000 | 0.285797000  |
| 6 | -3.294861000 | -0.312020000 | 0.036290000  |
| 6 | -4.150008000 | 0.584183000  | 0.672602000  |
| 6 | -3.815719000 | -1.431673000 | -0.610570000 |
| 6 | -5.520130000 | 0.355644000  | 0.658635000  |
| 1 | -3.738464000 | 1.440586000  | 1.194002000  |
| 6 | -5.184816000 | -1.656515000 | -0.608131000 |
| 1 | -3.144641000 | -2.114657000 | -1.120743000 |
| 6 | -6.044947000 | -0.762705000 | 0.021945000  |
| 1 | -6.180396000 | 1.055310000  | 1.160789000  |
| 1 | -5.582152000 | -2.530038000 | -1.114653000 |
| 1 | -7.115540000 | -0.936676000 | 0.014911000  |

**2'b**, TE = -2424.827370

|    |              |              |              |
|----|--------------|--------------|--------------|
| 6  | -0.652052000 | -1.454029000 | 0.028129000  |
| 6  | -1.246342000 | 0.807479000  | 0.077199000  |
| 7  | -1.639384000 | -0.564681000 | 0.006639000  |
| 7  | 0.596918000  | -1.188181000 | 0.136540000  |
| 25 | 0.817721000  | 0.955004000  | 0.065690000  |
| 6  | 0.562644000  | 0.926181000  | -1.747376000 |
| 8  | 0.355727000  | 0.942429000  | -2.875719000 |
| 6  | 0.754911000  | 1.061379000  | 1.901847000  |
| 8  | 0.659363000  | 1.180764000  | 3.037325000  |

|   |              |              |              |
|---|--------------|--------------|--------------|
| 6 | 0.965220000  | 2.787117000  | 0.001156000  |
| 7 | 1.135709000  | 3.949956000  | -0.037953000 |
| 6 | 2.675119000  | 0.810042000  | -0.090108000 |
| 7 | 3.836780000  | 0.739050000  | -0.240832000 |
| 6 | 1.173923000  | 5.355497000  | -0.071440000 |
| 1 | 1.650132000  | 5.743757000  | 0.832988000  |
| 1 | 1.742298000  | 5.699734000  | -0.939703000 |
| 1 | 0.159309000  | 5.762181000  | -0.134498000 |
| 6 | 5.199347000  | 0.434868000  | -0.423365000 |
| 1 | 5.357171000  | -0.639367000 | -0.288529000 |
| 1 | 5.517769000  | 0.715336000  | -1.430822000 |
| 1 | 5.810219000  | 0.979132000  | 0.301606000  |
| 6 | 1.574192000  | -2.195644000 | 0.114659000  |
| 6 | 2.669983000  | -2.114044000 | 0.978096000  |
| 6 | 1.475631000  | -3.291039000 | -0.750045000 |
| 6 | 3.641864000  | -3.105689000 | 0.973848000  |
| 1 | 2.734433000  | -1.278125000 | 1.665148000  |
| 6 | 2.451099000  | -4.278508000 | -0.748323000 |
| 1 | 0.629794000  | -3.352558000 | -1.427245000 |
| 6 | 3.542387000  | -4.192496000 | 0.110038000  |
| 1 | 4.476326000  | -3.037105000 | 1.665594000  |
| 1 | 2.358603000  | -5.120688000 | -1.427171000 |
| 1 | 4.302568000  | -4.966457000 | 0.110657000  |
| 6 | -2.973445000 | -1.069322000 | 0.107925000  |
| 6 | -3.859343000 | -0.537104000 | 1.042829000  |
| 6 | -3.374541000 | -2.114418000 | -0.720768000 |
| 6 | -5.142205000 | -1.059104000 | 1.140874000  |
| 1 | -3.533748000 | 0.270883000  | 1.684889000  |
| 6 | -4.655732000 | -2.638999000 | -0.604328000 |
| 1 | -2.678697000 | -2.508314000 | -1.454393000 |
| 6 | -5.546279000 | -2.109459000 | 0.322292000  |
| 1 | -5.829337000 | -0.647144000 | 1.873079000  |
| 1 | -4.959419000 | -3.457864000 | -1.248319000 |
| 1 | -6.550046000 | -2.512365000 | 0.407003000  |
| 7 | -2.305526000 | 1.674533000  | -0.183962000 |
| 6 | -2.907717000 | 1.670186000  | -1.508094000 |
| 1 | -3.027497000 | 0.648363000  | -1.870436000 |
| 1 | -3.900838000 | 2.129917000  | -1.462809000 |
| 1 | -2.297992000 | 2.227678000  | -2.237914000 |
| 6 | -2.212890000 | 2.998621000  | 0.378755000  |
| 1 | -3.219058000 | 3.419190000  | 0.492522000  |
| 1 | -1.741879000 | 2.950644000  | 1.361513000  |
| 1 | -1.629989000 | 3.688675000  | -0.254078000 |

2'c, TE = -2405.455495

|    |              |              |              |
|----|--------------|--------------|--------------|
| 6  | -0.869120000 | -1.332223000 | 0.046936000  |
| 6  | -1.263854000 | 0.954065000  | 0.190455000  |
| 7  | -1.773414000 | -0.356898000 | 0.056445000  |
| 7  | 0.405040000  | -1.165252000 | 0.115785000  |
| 25 | 0.789799000  | 0.954713000  | 0.007878000  |
| 6  | 0.341725000  | 1.018153000  | -1.770192000 |
| 8  | -0.003380000 | 1.117069000  | -2.858096000 |
| 6  | 0.929759000  | 1.030082000  | 1.843160000  |
| 8  | 0.970872000  | 1.140548000  | 2.981904000  |
| 6  | 1.122165000  | 2.764837000  | -0.023465000 |
| 7  | 1.410295000  | 3.904333000  | -0.035355000 |
| 6  | 2.596468000  | 0.628051000  | -0.355603000 |
| 7  | 3.714821000  | 0.429649000  | -0.648222000 |
| 6  | 1.700924000  | 5.280589000  | -0.034684000 |
| 1  | 2.201264000  | 5.561083000  | 0.896177000  |
| 1  | 2.356631000  | 5.530543000  | -0.873215000 |
| 1  | 0.780365000  | 5.865095000  | -0.125833000 |
| 6  | 4.998230000  | -0.050902000 | -0.974513000 |
| 1  | 5.058137000  | -1.118106000 | -0.741312000 |
| 1  | 5.194782000  | 0.091231000  | -2.040269000 |
| 1  | 5.760428000  | 0.484074000  | -0.402326000 |
| 6  | 1.281095000  | -2.255182000 | 0.194779000  |
| 6  | 2.441120000  | -2.168234000 | 0.971138000  |
| 6  | 1.017654000  | -3.450707000 | -0.487070000 |
| 6  | 3.312983000  | -3.245600000 | 1.056508000  |
| 1  | 2.633791000  | -1.258453000 | 1.527118000  |
| 6  | 1.893099000  | -4.522738000 | -0.394548000 |
| 1  | 0.122693000  | -3.521269000 | -1.096896000 |
| 6  | 3.050008000  | -4.428959000 | 0.372954000  |
| 1  | 4.198260000  | -3.164632000 | 1.680472000  |
| 1  | 1.670628000  | -5.439359000 | -0.932264000 |
| 1  | 3.732530000  | -5.269116000 | 0.443789000  |
| 6  | -3.159135000 | -0.709725000 | 0.016511000  |
| 6  | -4.041835000 | -0.182170000 | 0.954305000  |
| 6  | -3.609956000 | -1.602954000 | -0.949160000 |
| 6  | -5.377174000 | -0.556991000 | 0.921602000  |
| 1  | -3.674471000 | 0.510660000  | 1.701557000  |
| 6  | -4.946654000 | -1.983049000 | -0.965918000 |
| 1  | -2.912513000 | -1.987914000 | -1.685494000 |
| 6  | -5.834720000 | -1.458911000 | -0.034707000 |
| 1  | -6.064603000 | -0.147334000 | 1.654625000  |
| 1  | -5.294665000 | -2.682662000 | -1.718806000 |
| 1  | -6.879834000 | -1.749511000 | -0.053908000 |
| 8  | -2.251916000 | 1.829666000  | -0.147617000 |
| 6  | -2.030059000 | 3.179585000  | 0.180754000  |



|   |              |             |              |
|---|--------------|-------------|--------------|
| 1 | -1.682677000 | 3.283763000 | 1.214944000  |
| 1 | -1.295311000 | 3.632897000 | -0.492195000 |
| 1 | -2.988544000 | 3.687990000 | 0.061333000  |

**3a**, TE = -1946.692359

|    |              |              |              |
|----|--------------|--------------|--------------|
| 6  | -2.431975000 | 0.195423000  | -1.088298000 |
| 6  | -1.583128000 | 0.118049000  | 1.061640000  |
| 1  | -1.875291000 | 0.119465000  | 2.114590000  |
| 7  | -2.697592000 | 0.203899000  | 0.220124000  |
| 7  | -1.268904000 | 0.112878000  | -1.597074000 |
| 6  | -4.062686000 | 0.290958000  | 0.694292000  |
| 1  | -4.312130000 | -0.591178000 | 1.293688000  |
| 1  | -4.190530000 | 1.182848000  | 1.316933000  |
| 1  | -4.744418000 | 0.348857000  | -0.156100000 |
| 6  | -0.999159000 | 0.123477000  | -3.009992000 |
| 1  | -0.353210000 | 0.971511000  | -3.264179000 |
| 1  | -0.466229000 | -0.789355000 | -3.298405000 |
| 1  | -1.919546000 | 0.194040000  | -3.599341000 |
| 25 | 0.155552000  | -0.011087000 | 0.011519000  |
| 6  | 0.197041000  | 1.861457000  | 0.078544000  |
| 7  | 0.199186000  | 3.037349000  | 0.147762000  |
| 6  | 1.165818000  | -0.097937000 | 1.515200000  |
| 7  | 1.820662000  | -0.154679000 | 2.501345000  |
| 6  | 1.616160000  | -0.125115000 | -1.118807000 |
| 7  | 2.548750000  | -0.199153000 | -1.841414000 |
| 6  | -0.104039000 | -1.866590000 | 0.061595000  |
| 7  | -0.293431000 | -3.027810000 | 0.119003000  |
| 6  | 2.263929000  | -0.192905000 | 3.835348000  |
| 1  | 1.959933000  | -1.127866000 | 4.318457000  |
| 1  | 3.355182000  | -0.125751000 | 3.881637000  |
| 1  | 1.845444000  | 0.641497000  | 4.408898000  |
| 6  | 0.020445000  | 4.408896000  | 0.398964000  |
| 1  | -0.725742000 | 4.560839000  | 1.185497000  |
| 1  | 0.962119000  | 4.864985000  | 0.718442000  |
| 1  | -0.318871000 | 4.921161000  | -0.506086000 |
| 6  | 3.759170000  | -0.294330000 | -2.546502000 |
| 1  | 4.481923000  | 0.439488000  | -2.174314000 |
| 1  | 4.193974000  | -1.293209000 | -2.435252000 |
| 1  | 3.600160000  | -0.107602000 | -3.613215000 |
| 6  | -0.696126000 | -4.353868000 | 0.354701000  |
| 1  | 0.153449000  | -4.958241000 | 0.686078000  |
| 1  | -1.471290000 | -4.387998000 | 1.127032000  |
| 1  | -1.097123000 | -4.798803000 | -0.560660000 |

**3b**, TE = -2080.461749

|    |              |              |              |
|----|--------------|--------------|--------------|
| 6  | 0.975906000  | 0.781642000  | -2.341795000 |
| 6  | 1.529472000  | 0.430364000  | -0.100528000 |
| 7  | 1.932614000  | 0.807092000  | -1.420785000 |
| 7  | -0.224926000 | 0.412945000  | -2.143070000 |
| 25 | -0.497245000 | -0.005175000 | -0.053296000 |
| 6  | 0.001482000  | -1.767080000 | -0.411273000 |
| 7  | 0.317805000  | -2.880406000 | -0.645383000 |
| 6  | -0.685866000 | -0.391842000 | 1.707044000  |
| 7  | -0.927114000 | -0.655380000 | 2.841952000  |
| 6  | -2.300795000 | -0.327916000 | -0.303899000 |
| 7  | -3.452247000 | -0.543538000 | -0.449576000 |
| 6  | -0.745294000 | 1.828260000  | 0.289456000  |
| 7  | -0.865078000 | 2.976951000  | 0.513796000  |
| 6  | -0.662427000 | -0.932735000 | 4.198643000  |
| 1  | 0.416217000  | -0.932746000 | 4.398433000  |
| 1  | -1.132454000 | -0.183088000 | 4.842992000  |
| 1  | -1.064470000 | -1.912263000 | 4.475794000  |
| 6  | 1.035356000  | -4.075994000 | -0.835988000 |
| 1  | 2.066546000  | -3.965315000 | -0.481356000 |
| 1  | 0.563943000  | -4.896737000 | -0.287960000 |
| 1  | 1.057946000  | -4.341521000 | -1.896950000 |
| 6  | -4.824812000 | -0.824623000 | -0.537426000 |
| 1  | -5.038314000 | -1.827445000 | -0.153629000 |
| 1  | -5.404995000 | -0.101719000 | 0.045172000  |
| 1  | -5.161594000 | -0.776333000 | -1.577859000 |
| 6  | -0.821762000 | 4.353094000  | 0.796481000  |
| 1  | -1.414553000 | 4.578264000  | 1.687830000  |
| 1  | 0.209505000  | 4.675244000  | 0.971948000  |
| 1  | -1.227920000 | 4.926878000  | -0.041503000 |
| 6  | 3.194125000  | 1.470400000  | -1.709485000 |
| 6  | -1.164040000 | 0.153124000  | -3.203428000 |
| 7  | 2.665255000  | 0.192150000  | 0.704321000  |
| 6  | 2.469185000  | 0.408589000  | 2.116543000  |
| 1  | 1.936015000  | 1.347643000  | 2.272975000  |
| 1  | 1.886145000  | -0.400555000 | 2.590952000  |
| 1  | 3.441575000  | 0.464916000  | 2.620041000  |
| 6  | 3.369183000  | -1.055219000 | 0.452649000  |
| 1  | 3.491660000  | -1.205632000 | -0.622542000 |
| 1  | 4.363552000  | -1.030693000 | 0.914987000  |
| 1  | 2.822574000  | -1.927069000 | 0.857668000  |
| 1  | 3.191193000  | 1.779565000  | -2.755940000 |
| 1  | 3.314819000  | 2.347624000  | -1.066664000 |
| 1  | 4.042796000  | 0.805260000  | -1.534920000 |
| 1  | -2.087018000 | 0.717449000  | -3.035231000 |
| 1  | -0.755013000 | 0.429277000  | -4.180842000 |

1 -1.429465000 -0.910722000 -3.221750000

**3c**, TE = -2061.092781

|    |              |              |              |
|----|--------------|--------------|--------------|
| 6  | 1.311593000  | 1.631589000  | -1.662560000 |
| 6  | 1.606709000  | 0.531727000  | 0.366545000  |
| 7  | 2.153294000  | 1.306630000  | -0.689155000 |
| 7  | 0.118590000  | 1.202638000  | -1.785445000 |
| 25 | -0.336926000 | -0.040302000 | -0.088628000 |
| 6  | 0.503852000  | -1.498700000 | -0.899208000 |
| 7  | 1.082969000  | -2.400034000 | -1.387479000 |
| 6  | -0.725829000 | -1.008626000 | 1.388988000  |
| 7  | -1.088111000 | -1.649140000 | 2.325467000  |
| 6  | -2.002482000 | -0.447993000 | -0.785886000 |
| 7  | -3.059604000 | -0.732084000 | -1.226835000 |
| 6  | -0.917401000 | 1.515780000  | 0.796184000  |
| 7  | -1.247290000 | 2.487897000  | 1.370645000  |
| 6  | -0.974397000 | -2.237429000 | 3.603268000  |
| 1  | 0.076356000  | -2.400634000 | 3.871590000  |
| 1  | -1.427854000 | -1.594435000 | 4.364978000  |
| 1  | -1.489295000 | -3.202190000 | 3.628581000  |
| 6  | 1.989878000  | -3.356732000 | -1.878030000 |
| 1  | 2.997473000  | -3.154461000 | -1.501926000 |
| 1  | 1.692487000  | -4.361052000 | -1.562890000 |
| 1  | 2.013152000  | -3.332389000 | -2.971360000 |
| 6  | -4.324465000 | -1.134266000 | -1.684597000 |
| 1  | -4.327889000 | -2.203660000 | -1.918820000 |
| 1  | -5.087576000 | -0.945266000 | -0.922784000 |
| 1  | -4.598822000 | -0.583297000 | -2.589681000 |
| 6  | -1.441976000 | 3.647963000  | 2.141190000  |
| 1  | -2.260213000 | 3.500709000  | 2.851998000  |
| 1  | -0.532479000 | 3.891729000  | 2.698798000  |
| 1  | -1.693586000 | 4.495197000  | 1.496889000  |
| 6  | 3.543902000  | 1.721192000  | -0.738610000 |
| 6  | -0.832881000 | 1.764906000  | -2.708321000 |
| 8  | 2.670891000  | -0.135960000 | 0.949900000  |
| 6  | 2.372811000  | -0.778477000 | 2.158610000  |
| 1  | 1.700762000  | -1.630508000 | 1.999716000  |
| 1  | 3.319798000  | -1.134682000 | 2.571512000  |
| 1  | 1.900173000  | -0.086705000 | 2.868548000  |
| 1  | 4.204609000  | 0.857201000  | -0.839045000 |
| 1  | 3.677564000  | 2.386126000  | -1.592872000 |
| 1  | 3.807871000  | 2.249755000  | 0.181801000  |
| 1  | -0.347456000 | 2.422432000  | -3.437076000 |
| 1  | -1.347496000 | 0.963212000  | -3.246870000 |
| 1  | -1.596349000 | 2.341198000  | -2.170422000 |

3'a, TE = -2329.709702

|    |              |              |              |
|----|--------------|--------------|--------------|
| 6  | 1.103897000  | 1.154243000  | 0.049719000  |
| 6  | 1.238961000  | -1.149098000 | 0.201932000  |
| 1  | 1.936360000  | -1.985194000 | 0.142582000  |
| 7  | 1.901371000  | 0.078266000  | 0.122227000  |
| 7  | -0.179438000 | 1.127359000  | 0.067452000  |
| 25 | -0.753298000 | -0.983914000 | -0.022648000 |
| 6  | -0.378855000 | -0.986172000 | -1.863073000 |
| 7  | -0.110523000 | -0.996425000 | -3.007516000 |
| 6  | -0.952565000 | -2.792918000 | -0.028867000 |
| 7  | -1.038370000 | -3.970055000 | -0.026265000 |
| 6  | -2.554444000 | -0.696750000 | -0.364936000 |
| 7  | -3.699503000 | -0.564596000 | -0.623911000 |
| 6  | -0.947492000 | -0.952847000 | 1.849353000  |
| 7  | -1.039328000 | -0.939349000 | 3.021327000  |
| 6  | -1.164960000 | -5.367419000 | 0.007798000  |
| 1  | -0.704036000 | -5.775017000 | 0.913349000  |
| 1  | -2.219925000 | -5.660320000 | -0.002736000 |
| 1  | -0.674449000 | -5.820502000 | -0.859624000 |
| 6  | 0.334959000  | -1.029759000 | -4.340401000 |
| 1  | 1.399527000  | -1.279209000 | -4.380727000 |
| 1  | -0.222116000 | -1.779813000 | -4.909134000 |
| 1  | 0.186108000  | -0.055460000 | -4.814483000 |
| 6  | -4.978913000 | -0.100580000 | -0.979901000 |
| 1  | -5.228663000 | -0.408965000 | -1.999787000 |
| 1  | -5.737350000 | -0.507401000 | -0.304415000 |
| 1  | -5.013625000 | 0.992942000  | -0.928843000 |
| 6  | -0.989381000 | -0.899402000 | 4.425831000  |
| 1  | -1.703122000 | -1.609347000 | 4.853261000  |
| 1  | 0.013945000  | -1.155736000 | 4.779128000  |
| 1  | -1.239990000 | 0.102888000  | 4.784883000  |
| 6  | 3.308249000  | 0.269430000  | 0.149359000  |
| 6  | 4.129246000  | -0.670643000 | 0.770211000  |
| 6  | 3.879165000  | 1.392434000  | -0.451250000 |
| 6  | 5.505897000  | -0.482572000 | 0.788178000  |
| 1  | 3.684909000  | -1.531920000 | 1.254800000  |
| 6  | 5.253774000  | 1.575489000  | -0.419207000 |
| 1  | 3.237519000  | 2.113870000  | -0.946166000 |
| 6  | 6.077358000  | 0.637653000  | 0.197068000  |
| 1  | 6.135167000  | -1.218427000 | 1.278871000  |
| 1  | 5.685024000  | 2.453405000  | -0.889646000 |
| 1  | 7.152682000  | 0.779333000  | 0.214353000  |
| 6  | -0.938374000 | 2.299074000  | 0.090670000  |
| 6  | -2.208421000 | 2.290629000  | 0.678568000  |
| 6  | -0.463344000 | 3.502254000  | -0.453678000 |
| 6  | -2.974893000 | 3.447189000  | 0.718662000  |

|   |              |             |              |
|---|--------------|-------------|--------------|
| 1 | -2.568701000 | 1.368921000 | 1.118211000  |
| 6 | -1.236533000 | 4.652774000 | -0.409223000 |
| 1 | 0.517187000  | 3.516414000 | -0.918914000 |
| 6 | -2.499923000 | 4.637069000 | 0.174638000  |
| 1 | -3.952261000 | 3.420835000 | 1.192081000  |
| 1 | -0.848752000 | 5.571332000 | -0.839736000 |
| 1 | -3.102876000 | 5.538364000 | 0.206997000  |

**3'b**, TE = -2463.476683

|    |              |              |              |
|----|--------------|--------------|--------------|
| 6  | -0.715294000 | -1.484957000 | 0.025242000  |
| 6  | -1.245090000 | 0.796093000  | 0.097742000  |
| 7  | -1.677432000 | -0.561473000 | 0.037195000  |
| 7  | 0.545128000  | -1.263955000 | 0.103392000  |
| 25 | 0.818189000  | 0.900685000  | 0.044660000  |
| 6  | 0.581368000  | 0.848660000  | -1.812625000 |
| 7  | 0.428514000  | 0.812130000  | -2.979161000 |
| 6  | 1.002229000  | 2.707946000  | 0.017807000  |
| 7  | 1.234658000  | 3.870022000  | 0.003677000  |
| 6  | 2.652859000  | 0.761457000  | -0.163271000 |
| 7  | 3.817723000  | 0.732938000  | -0.349464000 |
| 6  | 0.859275000  | 0.900766000  | 1.928937000  |
| 7  | 0.858039000  | 0.898798000  | 3.104504000  |
| 6  | 1.107260000  | 5.270691000  | 0.028616000  |
| 1  | 0.053394000  | 5.567469000  | -0.034678000 |
| 1  | 1.525682000  | 5.678797000  | 0.954062000  |
| 1  | 1.643308000  | 5.720953000  | -0.812355000 |
| 6  | 0.038593000  | 0.793591000  | -4.329620000 |
| 1  | -1.020119000 | 1.058455000  | -4.424833000 |
| 1  | 0.630942000  | 1.508298000  | -4.907859000 |
| 1  | 0.189436000  | -0.202914000 | -4.754325000 |
| 6  | 5.159935000  | 0.403646000  | -0.610927000 |
| 1  | 5.451034000  | 0.744707000  | -1.609092000 |
| 1  | 5.821397000  | 0.878299000  | 0.119931000  |
| 1  | 5.297832000  | -0.681494000 | -0.558698000 |
| 6  | 0.738157000  | 0.841697000  | 4.504315000  |
| 1  | 1.290936000  | 1.663582000  | 4.967978000  |
| 1  | -0.312545000 | 0.915108000  | 4.800472000  |
| 1  | 1.140500000  | -0.103257000 | 4.880513000  |
| 6  | -3.017023000 | -1.038414000 | 0.166505000  |
| 6  | -3.896616000 | -0.444030000 | 1.071678000  |
| 6  | -3.440684000 | -2.120008000 | -0.604376000 |
| 6  | -5.187840000 | -0.939768000 | 1.197773000  |
| 1  | -3.558067000 | 0.394729000  | 1.665115000  |
| 6  | -4.729537000 | -2.617322000 | -0.459824000 |
| 1  | -2.751218000 | -2.565921000 | -1.313981000 |
| 6  | -5.611754000 | -2.025327000 | 0.437470000  |

|   |              |              |              |
|---|--------------|--------------|--------------|
| 1 | -5.867653000 | -0.476780000 | 1.906347000  |
| 1 | -5.046299000 | -3.465441000 | -1.058456000 |
| 1 | -6.622168000 | -2.406208000 | 0.543524000  |
| 6 | 1.477703000  | -2.304600000 | 0.075231000  |
| 6 | 2.663443000  | -2.193816000 | 0.809972000  |
| 6 | 1.256028000  | -3.475547000 | -0.663389000 |
| 6 | 3.598424000  | -3.219746000 | 0.798488000  |
| 1 | 2.823378000  | -1.300662000 | 1.401801000  |
| 6 | 2.195302000  | -4.496569000 | -0.668758000 |
| 1 | 0.339001000  | -3.567588000 | -1.236743000 |
| 6 | 3.376379000  | -4.377466000 | 0.057669000  |
| 1 | 4.505519000  | -3.119884000 | 1.387912000  |
| 1 | 2.003932000  | -5.393538000 | -1.250399000 |
| 1 | 4.109455000  | -5.177212000 | 0.051483000  |
| 7 | -2.297763000 | 1.680217000  | -0.179934000 |
| 6 | -2.132818000 | 3.027234000  | 0.303998000  |
| 1 | -1.654818000 | 3.007093000  | 1.284357000  |
| 1 | -1.514387000 | 3.646399000  | -0.368264000 |
| 1 | -3.114525000 | 3.507557000  | 0.396318000  |
| 6 | -2.895729000 | 1.645343000  | -1.503139000 |
| 1 | -3.082968000 | 0.615820000  | -1.812676000 |
| 1 | -3.856929000 | 2.171311000  | -1.490374000 |
| 1 | -2.248253000 | 2.127138000  | -2.258130000 |

**3'c**, TE = -2444.107526

|    |              |              |              |
|----|--------------|--------------|--------------|
| 6  | 0.989416000  | 1.322384000  | -0.155272000 |
| 6  | 1.214072000  | -0.913843000 | 0.427237000  |
| 7  | 1.814303000  | 0.292525000  | 0.166042000  |
| 7  | -0.312058000 | 1.228907000  | -0.053144000 |
| 25 | -0.771250000 | -0.886160000 | -0.033007000 |
| 6  | -0.168954000 | -1.046720000 | -1.810451000 |
| 7  | 0.226928000  | -1.163170000 | -2.909320000 |
| 6  | -1.182671000 | -2.658432000 | 0.030071000  |
| 7  | -1.501150000 | -3.798898000 | 0.060697000  |
| 6  | -2.486651000 | -0.565591000 | -0.662284000 |
| 7  | -3.558672000 | -0.399408000 | -1.125999000 |
| 6  | -1.213528000 | -0.693295000 | 1.788412000  |
| 7  | -1.462178000 | -0.569687000 | 2.929639000  |
| 6  | -2.218266000 | -5.008515000 | -0.013502000 |
| 1  | -1.641922000 | -5.826600000 | 0.428425000  |
| 1  | -3.168650000 | -4.927932000 | 0.524574000  |
| 1  | -2.432725000 | -5.265924000 | -1.055910000 |
| 6  | 0.769687000  | -1.262711000 | -4.202806000 |
| 1  | 1.828461000  | -1.532177000 | -4.150473000 |
| 1  | 0.241501000  | -2.027668000 | -4.778650000 |
| 1  | 0.676335000  | -0.306653000 | -4.725526000 |

|   |              |              |              |
|---|--------------|--------------|--------------|
| 6 | -4.741677000 | 0.201122000  | -1.602857000 |
| 1 | -4.810057000 | 0.098545000  | -2.689635000 |
| 1 | -5.619264000 | -0.274883000 | -1.156424000 |
| 1 | -4.744216000 | 1.266277000  | -1.348879000 |
| 6 | -1.690732000 | -0.279354000 | 4.287132000  |
| 1 | -2.500652000 | -0.900856000 | 4.678539000  |
| 1 | -0.788190000 | -0.470723000 | 4.874664000  |
| 1 | -1.967579000 | 0.772323000  | 4.403631000  |
| 6 | 3.222206000  | 0.553596000  | 0.143858000  |
| 6 | 4.013249000  | 0.290761000  | 1.257648000  |
| 6 | 3.785519000  | 1.108465000  | -1.001196000 |
| 6 | 5.369821000  | 0.583614000  | 1.218670000  |
| 1 | 3.561918000  | -0.140015000 | 2.142429000  |
| 6 | 5.141954000  | 1.409959000  | -1.027630000 |
| 1 | 3.150145000  | 1.305492000  | -1.857939000 |
| 6 | 5.938811000  | 1.145198000  | 0.079735000  |
| 1 | 5.985462000  | 0.378932000  | 2.088712000  |
| 1 | 5.576728000  | 1.848770000  | -1.920006000 |
| 1 | 6.998765000  | 1.376315000  | 0.057152000  |
| 6 | -1.103544000 | 2.357954000  | 0.005945000  |
| 6 | -2.416120000 | 2.296284000  | 0.509292000  |
| 6 | -0.625900000 | 3.618737000  | -0.414483000 |
| 6 | -3.208321000 | 3.432628000  | 0.575380000  |
| 1 | -2.788022000 | 1.348600000  | 0.877909000  |
| 6 | -1.429110000 | 4.745385000  | -0.344241000 |
| 1 | 0.383609000  | 3.686079000  | -0.807953000 |
| 6 | -2.730802000 | 4.670221000  | 0.145957000  |
| 1 | -4.211743000 | 3.354047000  | 0.985953000  |
| 1 | -1.032063000 | 5.699007000  | -0.681188000 |
| 1 | -3.355636000 | 5.555288000  | 0.199088000  |
| 8 | 2.148338000  | -1.825476000 | 0.783895000  |
| 6 | 1.693255000  | -3.134850000 | 1.041252000  |
| 1 | 1.339291000  | -3.616116000 | 0.125251000  |
| 1 | 2.551796000  | -3.681199000 | 1.436230000  |
| 1 | 0.880769000  | -3.130971000 | 1.773443000  |

**4a**, TE = -2060.017139

|   |              |              |              |
|---|--------------|--------------|--------------|
| 6 | 3.178133000  | -1.125279000 | -0.428813000 |
| 6 | 0.957194000  | -0.980861000 | 0.634374000  |
| 1 | 1.537105000  | -0.357574000 | 1.317056000  |
| 7 | 3.829320000  | -0.208737000 | 0.143283000  |
| 1 | 0.618360000  | -1.860531000 | 1.199973000  |
| 6 | -1.136566000 | 0.692703000  | 1.617589000  |
| 6 | -1.627983000 | -1.492974000 | -0.054580000 |
| 6 | 0.588745000  | 1.362582000  | -0.486950000 |
| 7 | -1.328453000 | 1.030618000  | 2.728353000  |

|    |              |              |              |
|----|--------------|--------------|--------------|
| 7  | 1.447679000  | 2.127057000  | -0.714747000 |
| 7  | -2.197338000 | -2.520911000 | -0.004173000 |
| 6  | -2.894657000 | -3.738473000 | 0.081093000  |
| 1  | -2.206435000 | -4.555583000 | 0.314430000  |
| 1  | -3.654864000 | -3.688632000 | 0.866544000  |
| 1  | -3.389867000 | -3.960763000 | -0.868532000 |
| 6  | -1.515249000 | 1.447570000  | 4.058230000  |
| 1  | -1.867414000 | 0.614467000  | 4.673265000  |
| 1  | -0.573964000 | 1.814659000  | 4.477216000  |
| 1  | -2.255031000 | 2.252071000  | 4.105841000  |
| 6  | 2.700557000  | 2.758336000  | -0.863464000 |
| 1  | 2.732389000  | 3.676539000  | -0.270934000 |
| 1  | 3.472166000  | 2.060835000  | -0.520817000 |
| 1  | 2.870894000  | 3.012586000  | -1.912849000 |
| 6  | 5.265053000  | -0.262156000 | 0.278824000  |
| 26 | -0.695146000 | 0.091264000  | -0.088828000 |
| 6  | -2.002235000 | 0.950787000  | -1.037309000 |
| 7  | -2.833187000 | 1.508382000  | -1.657796000 |
| 6  | -3.791773000 | 2.198257000  | -2.418555000 |
| 1  | -3.711261000 | 3.275797000  | -2.247255000 |
| 1  | -3.646430000 | 2.005196000  | -3.486049000 |
| 1  | -4.800837000 | 1.878173000  | -2.142812000 |
| 7  | 1.896790000  | -1.456747000 | -0.387265000 |
| 6  | 1.373794000  | -2.361220000 | -1.383049000 |
| 1  | 2.180550000  | -2.676307000 | -2.046083000 |
| 1  | 0.937767000  | -3.247828000 | -0.904081000 |
| 1  | 0.584375000  | -1.871030000 | -1.965559000 |
| 1  | 5.544981000  | -0.526273000 | 1.306506000  |
| 1  | 5.725728000  | -0.993929000 | -0.396861000 |
| 1  | 5.701816000  | 0.721998000  | 0.072587000  |

**4b**, TE = -5207.489050

|   |              |              |              |
|---|--------------|--------------|--------------|
| 6 | -2.005533000 | 1.511782000  | -1.226483000 |
| 6 | -1.294436000 | 1.264270000  | 1.038096000  |
| 1 | -1.916928000 | 0.803785000  | 1.817492000  |
| 7 | -1.178472000 | 0.668237000  | -1.692791000 |
| 1 | -0.739125000 | 2.092556000  | 1.495845000  |
| 6 | 0.962031000  | -0.461584000 | 1.571330000  |
| 6 | 1.281630000  | 1.421427000  | -0.275065000 |
| 6 | -1.378756000 | -1.534852000 | 0.369704000  |
| 7 | 1.602829000  | -0.596396000 | 2.547675000  |
| 7 | -2.148809000 | -2.357056000 | 0.702119000  |
| 7 | 2.233456000  | 1.963113000  | 0.295546000  |
| 6 | 2.935286000  | 3.133784000  | -0.203440000 |
| 1 | 2.529451000  | 3.486524000  | -1.161845000 |
| 1 | 2.866531000  | 3.942423000  | 0.531698000  |



|    |              |              |              |
|----|--------------|--------------|--------------|
| 1  | 3.997140000  | 2.897710000  | -0.330269000 |
| 6  | 2.563522000  | -0.353363000 | 3.553310000  |
| 1  | 3.165186000  | 0.517823000  | 3.280665000  |
| 1  | 2.069787000  | -0.163421000 | 4.510080000  |
| 1  | 3.218280000  | -1.221146000 | 3.669651000  |
| 6  | -3.051686000 | -3.352844000 | 1.115954000  |
| 1  | -2.919298000 | -3.567623000 | 2.180287000  |
| 1  | -4.080935000 | -3.022442000 | 0.951294000  |
| 1  | -2.885641000 | -4.273496000 | 0.549765000  |
| 6  | -0.726188000 | 0.698725000  | -3.064160000 |
| 6  | 1.120074000  | -1.298247000 | -1.083638000 |
| 7  | 1.832776000  | -1.955618000 | -1.743748000 |
| 6  | 2.742298000  | -2.680252000 | -2.535701000 |
| 1  | 2.617803000  | -3.753989000 | -2.371373000 |
| 1  | 2.573799000  | -2.466171000 | -3.594647000 |
| 1  | 3.768443000  | -2.401457000 | -2.281559000 |
| 7  | -2.219012000 | 1.823716000  | 0.032565000  |
| 6  | -3.323979000 | 2.659765000  | 0.435168000  |
| 44 | -0.032807000 | -0.147430000 | 0.004971000  |
| 1  | -3.884069000 | 2.986472000  | -0.443146000 |
| 1  | -3.996639000 | 2.110605000  | 1.104789000  |
| 1  | -2.954294000 | 3.541684000  | 0.970111000  |
| 1  | -0.697911000 | -0.318736000 | -3.465210000 |
| 1  | -1.381679000 | 1.309642000  | -3.692365000 |
| 1  | 0.288676000  | 1.112543000  | -3.099988000 |

4'a, TE = -2443.003083

|   |              |              |              |
|---|--------------|--------------|--------------|
| 6 | 0.631062000  | -1.458814000 | -0.060873000 |
| 6 | 1.091851000  | 0.525927000  | -1.257702000 |
| 1 | 0.784782000  | 0.380093000  | -2.299543000 |
| 7 | -0.602607000 | -0.989090000 | 0.113053000  |
| 1 | 1.898551000  | 1.261088000  | -1.239096000 |
| 6 | -0.167909000 | 2.823198000  | -0.429266000 |
| 6 | 0.834211000  | 1.063212000  | 1.295946000  |
| 6 | -1.612181000 | 0.844217000  | -1.483467000 |
| 7 | 0.057818000  | 3.934856000  | -0.717564000 |
| 7 | -2.275505000 | 0.595117000  | -2.409724000 |
| 7 | 1.713421000  | 0.999586000  | 2.056580000  |
| 6 | 2.866450000  | 0.713726000  | 2.822565000  |
| 1 | 3.428868000  | -0.084111000 | 2.329321000  |
| 1 | 3.490086000  | 1.606761000  | 2.900065000  |
| 1 | 2.574927000  | 0.391397000  | 3.824257000  |
| 6 | 0.363937000  | 5.259602000  | -1.085677000 |
| 1 | 1.436533000  | 5.359855000  | -1.269937000 |
| 1 | -0.176253000 | 5.529891000  | -1.996328000 |
| 1 | 0.076712000  | 5.949154000  | -0.287879000 |

|    |              |              |              |
|----|--------------|--------------|--------------|
| 6  | -3.120758000 | 0.026060000  | -3.386974000 |
| 1  | -2.529575000 | -0.301792000 | -4.244674000 |
| 1  | -3.632705000 | -0.836090000 | -2.951076000 |
| 1  | -3.857836000 | 0.759571000  | -3.720750000 |
| 6  | -1.678864000 | -1.837084000 | 0.138588000  |
| 6  | -3.010231000 | -1.372931000 | 0.245860000  |
| 6  | -1.501367000 | -3.244594000 | 0.054560000  |
| 6  | -4.082707000 | -2.250571000 | 0.244350000  |
| 1  | -3.198149000 | -0.309129000 | 0.310947000  |
| 6  | -2.584294000 | -4.106065000 | 0.052369000  |
| 1  | -0.489734000 | -3.633714000 | -0.003334000 |
| 6  | -3.891862000 | -3.630632000 | 0.147607000  |
| 1  | -5.090490000 | -1.848851000 | 0.318703000  |
| 1  | -2.403114000 | -5.175564000 | -0.016557000 |
| 1  | -4.734833000 | -4.312895000 | 0.156786000  |
| 26 | -0.484274000 | 1.075727000  | -0.028341000 |
| 6  | -1.813421000 | 1.415794000  | 1.229327000  |
| 7  | -2.600204000 | 1.641592000  | 2.064745000  |
| 6  | -3.583347000 | 1.699780000  | 3.073747000  |
| 1  | -4.294780000 | 2.501114000  | 2.861083000  |
| 1  | -4.117634000 | 0.747102000  | 3.118664000  |
| 1  | -3.114763000 | 1.890789000  | 4.041977000  |
| 7  | 1.594252000  | -0.732332000 | -0.702115000 |
| 6  | 2.933956000  | -1.014479000 | -0.536105000 |
| 6  | 3.943780000  | -0.280186000 | -1.187435000 |
| 6  | 3.328474000  | -2.083272000 | 0.301750000  |
| 6  | 5.280879000  | -0.577862000 | -0.974421000 |
| 1  | 3.678831000  | 0.513064000  | -1.876131000 |
| 6  | 4.671544000  | -2.364452000 | 0.499678000  |
| 1  | 2.559894000  | -2.679369000 | 0.783119000  |
| 6  | 5.666727000  | -1.615822000 | -0.124729000 |
| 1  | 6.036422000  | 0.006593000  | -1.491829000 |
| 1  | 4.944555000  | -3.191659000 | 1.149414000  |
| 1  | 6.715015000  | -1.848805000 | 0.026634000  |

**4'b**, TE = -5590.497210

|   |              |              |              |
|---|--------------|--------------|--------------|
| 6 | 0.797619000  | -1.537389000 | -0.055080000 |
| 6 | 1.143756000  | 0.457143000  | -1.305442000 |
| 1 | 0.852855000  | 0.259718000  | -2.343434000 |
| 7 | -0.469228000 | -1.153422000 | 0.128648000  |
| 1 | 1.913824000  | 1.229932000  | -1.310551000 |
| 6 | -0.321113000 | 2.866386000  | -0.428728000 |
| 6 | 0.890972000  | 1.069132000  | 1.355588000  |
| 6 | -1.717483000 | 0.694661000  | -1.565338000 |
| 7 | -0.180943000 | 4.000951000  | -0.688159000 |
| 7 | -2.370700000 | 0.411272000  | -2.488561000 |

|    |              |              |              |
|----|--------------|--------------|--------------|
| 7  | 1.792867000  | 1.032281000  | 2.090248000  |
| 6  | 2.974721000  | 0.781913000  | 2.824106000  |
| 1  | 3.544269000  | -0.002018000 | 2.316375000  |
| 1  | 3.574484000  | 1.692573000  | 2.880669000  |
| 1  | 2.719832000  | 0.455393000  | 3.834328000  |
| 6  | 0.014045000  | 5.356258000  | -1.014476000 |
| 1  | 1.076223000  | 5.608023000  | -0.956707000 |
| 1  | -0.337909000 | 5.553390000  | -2.030447000 |
| 1  | -0.537468000 | 5.996883000  | -0.321020000 |
| 6  | -3.195162000 | -0.171309000 | -3.474694000 |
| 1  | -2.604950000 | -0.401830000 | -4.364068000 |
| 1  | -3.624205000 | -1.094752000 | -3.076795000 |
| 1  | -3.998126000 | 0.517034000  | -3.747127000 |
| 6  | -1.482311000 | -2.077996000 | 0.153345000  |
| 6  | -2.840500000 | -1.703449000 | 0.254870000  |
| 6  | -1.205219000 | -3.468525000 | 0.085552000  |
| 6  | -3.850233000 | -2.652780000 | 0.261416000  |
| 1  | -3.095391000 | -0.652704000 | 0.314345000  |
| 6  | -2.226385000 | -4.402734000 | 0.092400000  |
| 1  | -0.168957000 | -3.787107000 | 0.033143000  |
| 6  | -3.563311000 | -4.016933000 | 0.179903000  |
| 1  | -4.883512000 | -2.321495000 | 0.331500000  |
| 1  | -1.972312000 | -5.457965000 | 0.036059000  |
| 1  | -4.357171000 | -4.755668000 | 0.195121000  |
| 6  | -1.968275000 | 1.290148000  | 1.294109000  |
| 7  | -2.781941000 | 1.447871000  | 2.120054000  |
| 6  | -3.768699000 | 1.440488000  | 3.126946000  |
| 1  | -4.562843000 | 2.149331000  | 2.881069000  |
| 1  | -4.196691000 | 0.438336000  | 3.214037000  |
| 1  | -3.327065000 | 1.723221000  | 4.085446000  |
| 7  | 1.712402000  | -0.759506000 | -0.708714000 |
| 6  | 3.065584000  | -0.968817000 | -0.551630000 |
| 6  | 4.032697000  | -0.193373000 | -1.221141000 |
| 6  | 3.521960000  | -2.003316000 | 0.299232000  |
| 6  | 5.384534000  | -0.418845000 | -1.013651000 |
| 1  | 3.724349000  | 0.575156000  | -1.919586000 |
| 6  | 4.879004000  | -2.211306000 | 0.491446000  |
| 1  | 2.789252000  | -2.632749000 | 0.793842000  |
| 6  | 5.830146000  | -1.422094000 | -0.151288000 |
| 1  | 6.105000000  | 0.195749000  | -1.545937000 |
| 1  | 5.198443000  | -3.013931000 | 1.150805000  |
| 1  | 6.890077000  | -1.598248000 | -0.004660000 |
| 44 | -0.523120000 | 1.005092000  | -0.032857000 |

5a, TE = -2482.221088

|    |              |              |              |
|----|--------------|--------------|--------------|
| 6  | -0.675173000 | -0.178030000 | 1.286531000  |
| 6  | 0.000318000  | -2.077725000 | -0.000959000 |
| 6  | 0.676248000  | -0.176851000 | -1.286664000 |
| 7  | 1.036630000  | -1.402641000 | -0.568350000 |
| 7  | -1.035869000 | -1.403272000 | 0.567450000  |
| 6  | 2.342433000  | -1.828663000 | -0.387826000 |
| 6  | 2.617532000  | -2.864379000 | 0.532517000  |
| 6  | 3.430136000  | -1.289953000 | -1.104169000 |
| 6  | 3.911801000  | -3.305627000 | 0.743372000  |
| 1  | 1.784286000  | -3.310485000 | 1.065161000  |
| 6  | 4.720642000  | -1.752941000 | -0.887618000 |
| 1  | 3.274396000  | -0.510222000 | -1.838102000 |
| 6  | 4.985222000  | -2.757919000 | 0.039893000  |
| 1  | 4.085052000  | -4.100453000 | 1.463341000  |
| 1  | 5.534308000  | -1.318575000 | -1.461723000 |
| 1  | 5.996078000  | -3.118086000 | 0.196830000  |
| 6  | -2.341660000 | -1.829320000 | 0.387230000  |
| 6  | -2.616769000 | -2.865705000 | -0.532373000 |
| 6  | -3.429390000 | -1.289961000 | 1.103058000  |
| 6  | -3.911054000 | -3.307033000 | -0.742968000 |
| 1  | -1.783524000 | -3.312261000 | -1.064639000 |
| 6  | -4.719903000 | -1.753057000 | 0.886785000  |
| 1  | -3.273724000 | -0.509481000 | 1.836202000  |
| 6  | -4.984482000 | -2.758753000 | -0.039954000 |
| 1  | -4.084306000 | -4.102405000 | -1.462333000 |
| 1  | -5.533591000 | -1.318140000 | 1.460443000  |
| 1  | -5.995349000 | -3.118988000 | -0.196668000 |
| 1  | -0.112530000 | -0.445494000 | -1.995559000 |
| 1  | 1.529057000  | 0.153802000  | -1.877303000 |
| 1  | 0.114503000  | -0.447178000 | 1.994228000  |
| 1  | -1.527374000 | 0.151654000  | 1.878596000  |
| 26 | -0.000226000 | 1.329828000  | 0.000278000  |
| 6  | 1.632946000  | 1.158728000  | 0.838892000  |
| 7  | 2.644597000  | 0.985631000  | 1.397224000  |
| 6  | -1.633016000 | 1.157822000  | -0.838884000 |
| 7  | -2.644194000 | 0.984329000  | -1.397947000 |
| 6  | 0.621922000  | 2.550683000  | -1.218095000 |
| 7  | 1.031217000  | 3.294747000  | -2.026933000 |
| 6  | -0.623499000 | 2.549413000  | 1.219325000  |
| 7  | -1.033514000 | 3.292575000  | 2.028631000  |
| 6  | 3.865590000  | 0.567620000  | 1.969421000  |
| 1  | 3.729412000  | 0.377407000  | 3.036577000  |
| 1  | 4.201496000  | -0.349356000 | 1.477580000  |
| 1  | 4.623418000  | 1.344558000  | 1.842418000  |
| 6  | 1.522556000  | 4.180731000  | -3.004508000 |

|   |              |              |              |
|---|--------------|--------------|--------------|
| 1 | 1.150130000  | 3.897137000  | -3.992320000 |
| 1 | 1.199139000  | 5.202312000  | -2.787372000 |
| 1 | 2.615246000  | 4.155118000  | -3.021792000 |
| 6 | -1.525696000 | 4.177439000  | 3.006795000  |
| 1 | -1.204035000 | 5.199609000  | 2.789821000  |
| 1 | -2.618333000 | 4.150078000  | 3.024712000  |
| 1 | -1.152240000 | 3.894104000  | 3.994293000  |
| 6 | -3.864547000 | 0.565758000  | -1.971098000 |
| 1 | -3.727129000 | 0.374325000  | -3.037876000 |
| 1 | -4.201065000 | -0.350651000 | -1.478620000 |
| 1 | -4.622474000 | 1.342888000  | -1.845864000 |

**5b**, TE = - 5629.716668

|   |              |              |              |
|---|--------------|--------------|--------------|
| 6 | -0.655139000 | -0.360017000 | 1.332180000  |
| 6 | 0.000056000  | -2.242037000 | -0.000141000 |
| 6 | 0.655283000  | -0.359875000 | -1.332247000 |
| 7 | 1.030546000  | -1.565319000 | -0.580688000 |
| 7 | -1.030418000 | -1.565410000 | 0.580549000  |
| 6 | 2.340737000  | -1.972605000 | -0.399200000 |
| 6 | 2.628576000  | -3.017229000 | 0.507270000  |
| 6 | 3.423798000  | -1.401315000 | -1.097507000 |
| 6 | 3.928404000  | -3.442178000 | 0.716020000  |
| 1 | 1.800042000  | -3.485045000 | 1.028360000  |
| 6 | 4.720397000  | -1.848936000 | -0.883513000 |
| 1 | 3.260740000  | -0.605433000 | -1.811999000 |
| 6 | 4.996313000  | -2.867182000 | 0.025761000  |
| 1 | 4.110743000  | -4.246507000 | 1.423047000  |
| 1 | 5.530004000  | -1.389951000 | -1.444113000 |
| 1 | 6.011726000  | -3.215505000 | 0.180033000  |
| 6 | -2.340604000 | -1.972731000 | 0.399134000  |
| 6 | -2.628459000 | -3.017391000 | -0.507292000 |
| 6 | -3.423649000 | -1.401439000 | 1.097466000  |
| 6 | -3.928289000 | -3.442364000 | -0.715982000 |
| 1 | -1.799938000 | -3.485209000 | -1.028401000 |
| 6 | -4.720248000 | -1.849091000 | 0.883536000  |
| 1 | -3.260580000 | -0.605524000 | 1.811919000  |
| 6 | -4.996182000 | -2.867367000 | -0.025700000 |
| 1 | -4.110640000 | -4.246721000 | -1.422975000 |
| 1 | -5.529841000 | -1.390100000 | 1.444150000  |
| 1 | -6.011595000 | -3.215713000 | -0.179923000 |
| 1 | -0.163523000 | -0.651941000 | -1.996190000 |
| 1 | 1.483240000  | -0.064001000 | -1.974792000 |
| 1 | 0.163742000  | -0.652110000 | 1.996020000  |
| 1 | -1.483048000 | -0.064250000 | 1.974836000  |
| 6 | 1.747413000  | 1.077014000  | 0.883699000  |
| 7 | 2.757753000  | 0.884191000  | 1.435529000  |

|    |              |              |              |
|----|--------------|--------------|--------------|
| 6  | -1.747438000 | 1.076884000  | -0.883697000 |
| 7  | -2.757765000 | 0.884056000  | -1.435548000 |
| 6  | 0.660576000  | 2.557822000  | -1.303583000 |
| 7  | 1.075202000  | 3.299732000  | -2.112333000 |
| 6  | -0.660767000 | 2.557688000  | 1.303661000  |
| 7  | -1.075491000 | 3.299505000  | 2.112445000  |
| 6  | 3.978396000  | 0.442148000  | 1.990228000  |
| 1  | 3.852410000  | 0.253351000  | 3.058730000  |
| 1  | 4.287568000  | -0.480003000 | 1.490552000  |
| 1  | 4.748254000  | 1.205138000  | 1.852824000  |
| 6  | 1.569847000  | 4.192718000  | -3.081494000 |
| 1  | 1.197680000  | 3.918656000  | -4.072145000 |
| 1  | 1.248908000  | 5.213322000  | -2.855756000 |
| 1  | 2.662539000  | 4.164120000  | -3.098040000 |
| 6  | -1.570245000 | 4.192399000  | 3.081635000  |
| 1  | -1.249150000 | 5.213003000  | 2.856116000  |
| 1  | -2.662944000 | 4.163915000  | 3.097945000  |
| 1  | -1.198317000 | 3.918150000  | 4.072324000  |
| 6  | -3.978390000 | 0.442018000  | -1.990288000 |
| 1  | -3.852380000 | 0.253254000  | -3.058794000 |
| 1  | -4.287556000 | -0.480159000 | -1.490655000 |
| 1  | -4.748261000 | 1.204992000  | -1.852875000 |
| 44 | -0.000021000 | 1.255713000  | 0.000010000  |

**6a**, TE = -2630.247721

|   |              |              |              |
|---|--------------|--------------|--------------|
| 6 | 0.467927000  | 1.478148000  | 0.205024000  |
| 7 | -0.895883000 | 1.293325000  | -0.204535000 |
| 6 | -1.200561000 | 0.063319000  | -0.731073000 |
| 7 | -1.057457000 | -1.146887000 | -0.082377000 |
| 6 | 0.283778000  | -1.470036000 | 0.317309000  |
| 8 | 0.768821000  | 2.536785000  | 0.724709000  |
| 6 | -1.933484000 | 2.238045000  | 0.013829000  |
| 6 | -1.717068000 | 3.609693000  | -0.142118000 |
| 6 | -2.765248000 | 4.500324000  | 0.050127000  |
| 6 | -4.036227000 | 4.047472000  | 0.387923000  |
| 6 | -4.251892000 | 2.681778000  | 0.535598000  |
| 6 | -3.210036000 | 1.782402000  | 0.354686000  |
| 1 | -0.729908000 | 3.967779000  | -0.397898000 |
| 1 | -2.583773000 | 5.563936000  | -0.071470000 |
| 1 | -4.849685000 | 4.750863000  | 0.532805000  |
| 1 | -5.236619000 | 2.309127000  | 0.800076000  |
| 1 | -3.382642000 | 0.717658000  | 0.476353000  |
| 6 | -2.174694000 | -2.015117000 | 0.000036000  |
| 6 | -3.215142000 | -1.857203000 | -0.923850000 |
| 6 | -4.347087000 | -2.657564000 | -0.860894000 |
| 6 | -4.459938000 | -3.640435000 | 0.115280000  |

|    |              |              |              |
|----|--------------|--------------|--------------|
| 6  | -3.425452000 | -3.802046000 | 1.029911000  |
| 6  | -2.290469000 | -3.001758000 | 0.985246000  |
| 1  | -3.125033000 | -1.098216000 | -1.694398000 |
| 1  | -5.141520000 | -2.513443000 | -1.586716000 |
| 1  | -5.341798000 | -4.270706000 | 0.163275000  |
| 1  | -3.500648000 | -4.560789000 | 1.803061000  |
| 1  | -1.492392000 | -3.136519000 | 1.699693000  |
| 8  | 0.474345000  | -2.535299000 | 0.876208000  |
| 26 | 1.696687000  | -0.088956000 | -0.072987000 |
| 6  | 2.836158000  | -1.548295000 | -0.249957000 |
| 6  | 3.012645000  | 1.191767000  | -0.358716000 |
| 6  | 1.224142000  | -0.127674000 | -1.854946000 |
| 7  | 3.806651000  | 2.032081000  | -0.519741000 |
| 7  | 3.510364000  | -2.496497000 | -0.342225000 |
| 7  | 1.008018000  | -0.156160000 | -3.007372000 |
| 6  | 0.309430000  | -0.157368000 | -4.233912000 |
| 1  | 0.474679000  | -1.100650000 | -4.759665000 |
| 1  | -0.760801000 | -0.034611000 | -4.041846000 |
| 1  | 0.657756000  | 0.662196000  | -4.866674000 |
| 6  | 4.607779000  | 3.186967000  | -0.621564000 |
| 1  | 4.821070000  | 3.404972000  | -1.670639000 |
| 1  | 4.079947000  | 4.035395000  | -0.179295000 |
| 1  | 5.552756000  | 3.037283000  | -0.094094000 |
| 6  | 4.118177000  | -3.768280000 | -0.347545000 |
| 1  | 5.046603000  | -3.744095000 | 0.227751000  |
| 1  | 3.436149000  | -4.495994000 | 0.098867000  |
| 1  | 4.346671000  | -4.071293000 | -1.371942000 |
| 6  | 1.887378000  | -0.017222000 | 1.762770000  |
| 7  | 1.960074000  | 0.043043000  | 2.924738000  |
| 6  | 1.897887000  | 0.166170000  | 4.326192000  |
| 1  | 1.326318000  | -0.664982000 | 4.745914000  |
| 1  | 2.904453000  | 0.155463000  | 4.750817000  |
| 1  | 1.408844000  | 1.106739000  | 4.590811000  |

**6b**, TE = -5777.740800

|   |              |              |              |
|---|--------------|--------------|--------------|
| 6 | 0.296174000  | 1.536577000  | 0.219806000  |
| 7 | -1.063257000 | 1.297520000  | -0.180301000 |
| 6 | -1.327576000 | 0.059580000  | -0.715893000 |
| 7 | -1.198373000 | -1.156806000 | -0.072096000 |
| 6 | 0.139392000  | -1.517642000 | 0.312713000  |
| 8 | 0.562627000  | 2.604827000  | 0.738526000  |
| 6 | -2.130285000 | 2.209797000  | 0.033731000  |
| 6 | -1.957880000 | 3.586695000  | -0.131568000 |
| 6 | -3.032806000 | 4.445298000  | 0.058515000  |
| 6 | -4.288033000 | 3.955109000  | 0.402753000  |
| 6 | -4.460261000 | 2.584282000  | 0.558941000  |

|    |              |              |              |
|----|--------------|--------------|--------------|
| 6  | -3.391159000 | 1.716825000  | 0.381029000  |
| 1  | -0.983420000 | 3.974383000  | -0.392662000 |
| 1  | -2.884977000 | 5.513296000  | -0.070043000 |
| 1  | -5.122665000 | 4.633576000  | 0.546037000  |
| 1  | -5.432100000 | 2.182401000  | 0.828216000  |
| 1  | -3.530679000 | 0.648286000  | 0.509995000  |
| 6  | -2.327425000 | -2.010549000 | 0.008915000  |
| 6  | -3.352232000 | -1.863262000 | -0.933139000 |
| 6  | -4.492803000 | -2.651376000 | -0.868442000 |
| 6  | -4.628703000 | -3.611096000 | 0.127599000  |
| 6  | -3.609282000 | -3.762084000 | 1.060871000  |
| 6  | -2.466577000 | -2.973151000 | 1.014266000  |
| 1  | -3.243619000 | -1.121369000 | -1.717660000 |
| 1  | -5.275885000 | -2.516073000 | -1.608138000 |
| 1  | -5.517215000 | -4.231872000 | 0.176852000  |
| 1  | -3.703036000 | -4.502564000 | 1.849507000  |
| 1  | -1.680091000 | -3.099251000 | 1.743230000  |
| 8  | 0.313044000  | -2.596300000 | 0.850179000  |
| 6  | 2.847999000  | -1.641128000 | -0.261349000 |
| 6  | 3.005533000  | 1.342915000  | -0.362335000 |
| 6  | 1.153768000  | -0.108702000 | -1.984077000 |
| 7  | 3.748683000  | 2.232990000  | -0.501907000 |
| 7  | 3.488443000  | -2.614307000 | -0.339690000 |
| 7  | 0.894983000  | -0.129945000 | -3.125242000 |
| 6  | 0.222064000  | -0.133464000 | -4.364785000 |
| 1  | 0.402710000  | -1.076051000 | -4.886558000 |
| 1  | -0.852062000 | -0.016021000 | -4.194752000 |
| 1  | 0.579577000  | 0.688769000  | -4.988767000 |
| 6  | 4.482206000  | 3.432902000  | -0.591466000 |
| 1  | 4.698846000  | 3.662580000  | -1.637397000 |
| 1  | 3.898579000  | 4.249185000  | -0.158798000 |
| 1  | 5.425852000  | 3.338730000  | -0.048941000 |
| 6  | 4.065052000  | -3.900364000 | -0.348812000 |
| 1  | 4.990088000  | -3.902077000 | 0.232491000  |
| 1  | 3.363300000  | -4.615141000 | 0.087892000  |
| 1  | 4.292727000  | -4.201609000 | -1.373962000 |
| 6  | 1.857617000  | -0.003894000 | 1.879850000  |
| 7  | 1.930418000  | 0.053238000  | 3.041394000  |
| 6  | 1.897119000  | 0.163778000  | 4.445088000  |
| 1  | 1.359354000  | -0.686834000 | 4.870077000  |
| 1  | 2.913694000  | 0.178802000  | 4.844783000  |
| 1  | 1.387500000  | 1.087743000  | 4.728102000  |
| 44 | 1.642965000  | -0.072232000 | -0.078580000 |



Cartesian coordinates for the optimized structure of GaCl<sub>3</sub> adducts of **1a-6b**, along with their total energies (in hartrees) including zero point vibrational correction.

**1a-GaCl<sub>3</sub>**, TE = -5174.419187

|    |              |              |              |
|----|--------------|--------------|--------------|
| 6  | -0.492551000 | 0.313884000  | -0.081212000 |
| 6  | 1.378018000  | 1.715330000  | -0.053211000 |
| 1  | 1.732939000  | 2.749431000  | -0.061393000 |
| 7  | 0.070228000  | 1.633472000  | -0.086502000 |
| 7  | 0.432751000  | -0.576405000 | -0.055984000 |
| 6  | -0.803754000 | 2.806518000  | -0.134761000 |
| 1  | -1.453996000 | 2.826599000  | 0.739330000  |
| 1  | -0.177400000 | 3.697464000  | -0.156686000 |
| 1  | -1.431106000 | 2.769336000  | -1.025107000 |
| 6  | 0.113967000  | -1.994170000 | -0.052950000 |
| 1  | 0.642602000  | -2.472452000 | -0.881530000 |
| 1  | 0.469354000  | -2.434616000 | 0.882742000  |
| 1  | -0.950678000 | -2.195978000 | -0.155669000 |
| 25 | 2.379011000  | 0.054185000  | 0.000560000  |
| 6  | 2.403112000  | 0.044893000  | -1.854475000 |
| 8  | 2.417201000  | 0.056549000  | -2.989245000 |
| 6  | 3.976006000  | 0.911076000  | 0.040928000  |
| 8  | 4.954087000  | 1.497476000  | 0.063892000  |
| 6  | 3.149696000  | -1.631742000 | 0.053300000  |
| 8  | 3.646936000  | -2.654040000 | 0.087575000  |
| 6  | 2.280858000  | 0.098754000  | 1.853073000  |
| 8  | 2.221802000  | 0.144570000  | 2.985392000  |
| 31 | -2.528387000 | -0.124616000 | -0.074362000 |
| 17 | -2.799533000 | -1.276698000 | 1.766799000  |
| 17 | -2.840990000 | -1.267781000 | -1.914128000 |
| 17 | -3.850475000 | 1.614889000  | -0.052570000 |

**1b-GaCl<sub>3</sub>**, TE = -5308.210679

|    |              |              |              |
|----|--------------|--------------|--------------|
| 6  | 0.675345000  | -0.127745000 | 0.248841000  |
| 6  | -1.256721000 | 1.231562000  | 0.146490000  |
| 7  | 0.087104000  | 1.143241000  | 0.361242000  |
| 7  | -0.170850000 | -1.090249000 | 0.161429000  |
| 25 | -2.147583000 | -0.593330000 | 0.028326000  |
| 6  | -2.263201000 | -0.582763000 | 1.874545000  |
| 8  | -2.328949000 | -0.541284000 | 3.008668000  |
| 6  | -3.889008000 | -0.135194000 | -0.133959000 |
| 8  | -5.007873000 | 0.075198000  | -0.250573000 |
| 6  | -2.665055000 | -2.349529000 | -0.097829000 |
| 8  | -3.019600000 | -3.429020000 | -0.179454000 |
| 6  | -1.917096000 | -0.429853000 | -1.803745000 |

|    |              |              |              |
|----|--------------|--------------|--------------|
| 8  | -1.784683000 | -0.297326000 | -2.924163000 |
| 6  | 0.281841000  | -2.468436000 | 0.095952000  |
| 6  | 0.849193000  | 2.187072000  | 1.065823000  |
| 7  | -1.739954000 | 2.458873000  | -0.045609000 |
| 6  | -0.961059000 | 3.547210000  | -0.640568000 |
| 1  | -0.684847000 | 4.311012000  | 0.091262000  |
| 1  | -0.065243000 | 3.155160000  | -1.119211000 |
| 1  | -1.583853000 | 4.012328000  | -1.409096000 |
| 6  | -3.160033000 | 2.752875000  | 0.052393000  |
| 1  | -3.272047000 | 3.793941000  | 0.363625000  |
| 1  | -3.666136000 | 2.622583000  | -0.910294000 |
| 1  | -3.629940000 | 2.128120000  | 0.806294000  |
| 1  | 0.152436000  | 2.778327000  | 1.661050000  |
| 1  | 1.548098000  | 1.696446000  | 1.744241000  |
| 1  | 1.417877000  | 2.826808000  | 0.392894000  |
| 1  | 1.356960000  | -2.556328000 | 0.247805000  |
| 1  | -0.236049000 | -3.045628000 | 0.866533000  |
| 1  | 0.035903000  | -2.901194000 | -0.878137000 |
| 31 | 2.729936000  | -0.157464000 | -0.020718000 |
| 17 | 3.479089000  | -1.931343000 | -1.048288000 |
| 17 | 3.649263000  | 0.064838000  | 1.957276000  |
| 17 | 3.072702000  | 1.578168000  | -1.341093000 |

**1c-GaCl<sub>3</sub>**, TE = -5288.837493

|    |              |              |              |
|----|--------------|--------------|--------------|
| 6  | -0.648593000 | 0.193823000  | 0.203892000  |
| 6  | 1.329973000  | 1.443515000  | 0.020890000  |
| 7  | -0.005152000 | 1.448328000  | 0.155360000  |
| 7  | 0.177781000  | -0.789888000 | 0.248265000  |
| 25 | 2.163066000  | -0.375968000 | 0.007144000  |
| 6  | 1.891768000  | -0.414925000 | -1.831272000 |
| 8  | 1.736017000  | -0.418911000 | -2.954880000 |
| 6  | 3.909015000  | 0.040467000  | -0.232920000 |
| 8  | 5.026539000  | 0.231090000  | -0.382320000 |
| 6  | 2.641274000  | -2.155095000 | 0.029952000  |
| 8  | 2.970364000  | -3.243953000 | 0.037017000  |
| 6  | 2.334378000  | -0.235389000 | 1.845915000  |
| 8  | 2.438659000  | -0.131183000 | 2.972065000  |
| 6  | -0.301692000 | -2.157118000 | 0.373944000  |
| 8  | 1.792783000  | 2.667707000  | -0.045563000 |
| 6  | 3.189643000  | 2.929709000  | -0.167347000 |
| 1  | 3.732188000  | 2.521808000  | 0.685986000  |
| 1  | 3.574121000  | 2.522366000  | -1.102901000 |
| 1  | 3.277211000  | 4.014654000  | -0.175577000 |
| 6  | -0.762272000 | 2.692468000  | 0.316261000  |
| 1  | -0.169765000 | 3.394263000  | 0.899867000  |
| 1  | -0.998986000 | 3.131957000  | -0.653857000 |

|    |              |              |              |
|----|--------------|--------------|--------------|
| 1  | -1.691364000 | 2.474746000  | 0.834637000  |
| 1  | -1.349649000 | -2.203912000 | 0.669658000  |
| 1  | -0.179410000 | -2.687937000 | -0.574077000 |
| 1  | 0.289235000  | -2.663798000 | 1.140785000  |
| 31 | -2.703595000 | -0.071633000 | -0.004237000 |
| 17 | -3.808688000 | 1.736172000  | -0.544746000 |
| 17 | -2.877113000 | -1.487647000 | -1.669455000 |
| 17 | -3.383202000 | -0.857709000 | 1.922226000  |

**1'a-GaCl<sub>3</sub>, TE = -5557.420885**

|    |              |              |              |
|----|--------------|--------------|--------------|
| 6  | 0.318892000  | -0.008877000 | -0.028262000 |
| 6  | -0.436485000 | -2.228726000 | 0.007528000  |
| 1  | -0.129118000 | -3.276667000 | 0.054278000  |
| 7  | 0.599572000  | -1.414519000 | 0.006935000  |
| 7  | -0.953574000 | 0.197808000  | -0.014713000 |
| 25 | -2.201742000 | -1.438956000 | -0.004559000 |
| 6  | -2.186443000 | -1.464757000 | -1.858103000 |
| 8  | -2.168518000 | -1.503586000 | -2.992901000 |
| 6  | -3.017177000 | -3.054955000 | 0.025552000  |
| 8  | -3.480561000 | -4.097313000 | 0.046234000  |
| 6  | -3.810322000 | -0.499381000 | 0.012421000  |
| 8  | -4.816454000 | 0.027023000  | 0.031269000  |
| 6  | -2.152459000 | -1.403974000 | 1.850401000  |
| 8  | -2.113178000 | -1.395755000 | 2.984662000  |
| 6  | -1.463150000 | 1.527144000  | 0.091251000  |
| 6  | -1.219785000 | 2.261483000  | 1.247109000  |
| 6  | -2.239707000 | 2.057737000  | -0.934700000 |
| 6  | -1.747757000 | 3.541272000  | 1.366938000  |
| 1  | -0.606599000 | 1.841227000  | 2.036997000  |
| 6  | -2.752633000 | 3.339286000  | -0.809320000 |
| 1  | -2.405996000 | 1.486110000  | -1.841599000 |
| 6  | -2.512485000 | 4.082034000  | 0.342653000  |
| 1  | -1.546248000 | 4.117809000  | 2.263186000  |
| 1  | -3.334930000 | 3.763905000  | -1.619946000 |
| 1  | -2.915946000 | 5.084487000  | 0.435790000  |
| 6  | 1.945326000  | -1.927303000 | 0.112403000  |
| 6  | 2.697049000  | -1.635547000 | 1.240860000  |
| 6  | 2.434006000  | -2.744919000 | -0.897320000 |
| 6  | 3.974332000  | -2.170068000 | 1.349689000  |
| 1  | 2.304480000  | -0.982267000 | 2.012017000  |
| 6  | 3.708188000  | -3.279868000 | -0.772318000 |
| 1  | 1.837647000  | -2.929686000 | -1.784652000 |
| 6  | 4.477913000  | -2.992064000 | 0.349270000  |
| 1  | 4.575911000  | -1.936165000 | 2.220916000  |
| 1  | 4.105876000  | -3.907881000 | -1.561887000 |
| 1  | 5.478389000  | -3.401568000 | 0.437794000  |

|    |             |             |              |
|----|-------------|-------------|--------------|
| 31 | 1.825392000 | 1.426622000 | -0.201049000 |
| 17 | 2.399087000 | 1.861485000 | 1.879678000  |
| 17 | 3.459859000 | 0.590707000 | -1.386380000 |
| 17 | 1.087924000 | 3.181470000 | -1.256967000 |

**1'b-GaCl<sub>3</sub>, TE = -5691.209135**

|    |              |              |              |
|----|--------------|--------------|--------------|
| 6  | 0.363513000  | 0.179400000  | -0.021581000 |
| 6  | -0.679864000 | -1.961383000 | 0.037749000  |
| 7  | 0.479715000  | -1.222519000 | 0.078230000  |
| 7  | -0.859345000 | 0.582663000  | -0.085681000 |
| 25 | -2.350261000 | -0.800565000 | -0.047931000 |
| 6  | -2.310979000 | -0.895211000 | -1.894870000 |
| 8  | -2.270693000 | -0.990910000 | -3.027701000 |
| 6  | -3.665885000 | -2.036854000 | 0.042376000  |
| 8  | -4.553543000 | -2.755631000 | 0.119596000  |
| 6  | -3.674016000 | 0.486232000  | -0.025296000 |
| 8  | -4.533124000 | 1.230369000  | 0.002129000  |
| 6  | -2.231306000 | -0.799060000 | 1.800442000  |
| 8  | -2.153257000 | -0.830533000 | 2.933771000  |
| 6  | -1.183902000 | 1.973575000  | -0.066247000 |
| 6  | -1.087740000 | 2.680996000  | 1.127075000  |
| 6  | -1.664732000 | 2.590945000  | -1.216776000 |
| 6  | -1.465747000 | 4.017644000  | 1.162582000  |
| 1  | -0.695155000 | 2.193101000  | 2.013253000  |
| 6  | -2.035172000 | 3.926470000  | -1.172403000 |
| 1  | -1.718104000 | 2.034708000  | -2.146903000 |
| 6  | -1.941582000 | 4.641375000  | 0.017131000  |
| 1  | -1.374061000 | 4.573125000  | 2.089717000  |
| 1  | -2.388374000 | 4.414301000  | -2.074664000 |
| 1  | -2.229957000 | 5.686602000  | 0.046558000  |
| 6  | 1.792697000  | -1.813096000 | -0.051357000 |
| 6  | 2.696953000  | -1.751415000 | 1.000006000  |
| 6  | 2.125511000  | -2.440712000 | -1.245328000 |
| 6  | 3.946437000  | -2.339691000 | 0.855687000  |
| 1  | 2.433019000  | -1.229525000 | 1.913492000  |
| 6  | 3.372780000  | -3.035915000 | -1.377061000 |
| 1  | 1.418846000  | -2.447114000 | -2.068769000 |
| 6  | 4.281810000  | -2.989515000 | -0.325789000 |
| 1  | 4.662146000  | -2.277255000 | 1.667999000  |
| 1  | 3.642164000  | -3.517452000 | -2.310927000 |
| 1  | 5.261133000  | -3.442821000 | -0.436293000 |
| 7  | -0.605254000 | -3.278886000 | 0.222462000  |
| 6  | 0.411021000  | -4.004103000 | 0.989823000  |
| 1  | 1.180500000  | -4.443838000 | 0.350416000  |
| 1  | 0.881580000  | -3.354232000 | 1.721078000  |
| 1  | -0.110421000 | -4.802618000 | 1.524079000  |

|    |              |              |              |
|----|--------------|--------------|--------------|
| 6  | -1.664500000 | -4.161349000 | -0.243321000 |
| 1  | -1.195999000 | -5.063488000 | -0.646332000 |
| 1  | -2.335201000 | -4.454444000 | 0.570710000  |
| 1  | -2.230487000 | -3.693295000 | -1.042907000 |
| 31 | 2.035412000  | 1.441969000  | -0.007627000 |
| 17 | 2.472037000  | 1.548648000  | 2.157937000  |
| 17 | 3.694395000  | 0.655405000  | -1.200704000 |
| 17 | 1.664418000  | 3.427252000  | -0.829015000 |

**1'*c*-GaCl<sub>3</sub>**, TE = -5671.838024

|    |              |              |              |
|----|--------------|--------------|--------------|
| 6  | -0.376096000 | 0.122574000  | -0.130594000 |
| 6  | 0.598327000  | -2.023877000 | -0.006005000 |
| 7  | -0.528583000 | -1.278249000 | -0.081469000 |
| 7  | 0.863355000  | 0.478179000  | -0.127820000 |
| 25 | 2.295334000  | -0.979333000 | -0.010857000 |
| 6  | 2.166418000  | -0.895390000 | 1.838882000  |
| 8  | 2.084959000  | -0.867499000 | 2.970771000  |
| 6  | 3.524999000  | -2.301683000 | 0.106006000  |
| 8  | 4.354436000  | -3.086029000 | 0.177309000  |
| 6  | 3.685881000  | 0.246889000  | -0.010552000 |
| 8  | 4.576340000  | 0.951206000  | 0.004608000  |
| 6  | 2.302987000  | -1.102055000 | -1.858326000 |
| 8  | 2.299322000  | -1.200754000 | -2.990379000 |
| 6  | 1.236728000  | 1.857173000  | -0.082047000 |
| 6  | 1.768269000  | 2.464557000  | -1.215292000 |
| 6  | 1.127318000  | 2.559779000  | 1.112606000  |
| 6  | 2.176206000  | 3.788594000  | -1.153506000 |
| 1  | 1.830227000  | 1.911277000  | -2.146762000 |
| 6  | 1.542997000  | 3.884820000  | 1.165057000  |
| 1  | 0.690152000  | 2.082196000  | 1.983115000  |
| 6  | 2.068882000  | 4.499999000  | 0.036904000  |
| 1  | 2.568782000  | 4.270082000  | -2.042779000 |
| 1  | 1.440309000  | 4.438630000  | 2.092021000  |
| 1  | 2.385518000  | 5.536527000  | 0.080258000  |
| 6  | -1.833311000 | -1.902499000 | -0.054760000 |
| 6  | -2.332548000 | -2.476824000 | -1.215179000 |
| 6  | -2.543261000 | -1.939219000 | 1.135445000  |
| 6  | -3.572922000 | -3.095490000 | -1.182214000 |
| 1  | -1.764542000 | -2.418365000 | -2.137434000 |
| 6  | -3.789711000 | -2.553337000 | 1.155790000  |
| 1  | -2.143074000 | -1.464611000 | 2.024302000  |
| 6  | -4.301244000 | -3.133217000 | 0.002294000  |
| 1  | -3.979827000 | -3.532932000 | -2.087365000 |
| 1  | -4.363240000 | -2.566698000 | 2.076020000  |
| 1  | -5.277783000 | -3.605379000 | 0.021477000  |
| 8  | 0.305402000  | -3.292233000 | 0.067385000  |

|    |              |              |              |
|----|--------------|--------------|--------------|
| 6  | 1.317037000  | -4.292180000 | 0.166295000  |
| 1  | 1.960974000  | -4.273483000 | -0.713356000 |
| 1  | 1.899857000  | -4.157725000 | 1.077998000  |
| 1  | 0.777800000  | -5.236622000 | 0.209526000  |
| 31 | -2.023379000 | 1.405998000  | -0.046420000 |
| 17 | -2.298217000 | 1.527458000  | 2.142097000  |
| 17 | -1.603754000 | 3.342696000  | -0.952147000 |
| 17 | -3.779942000 | 0.613715000  | -1.070183000 |

**2a-GaCl<sub>3</sub>, TE = -5213.092635**

|    |              |              |              |
|----|--------------|--------------|--------------|
| 6  | -0.892256000 | -0.379771000 | -0.076381000 |
| 6  | 0.970492000  | -1.781959000 | -0.055159000 |
| 1  | 1.308734000  | -2.823622000 | -0.065147000 |
| 7  | -0.346809000 | -1.697213000 | -0.083138000 |
| 7  | 0.041386000  | 0.503927000  | -0.050907000 |
| 6  | -1.225216000 | -2.863989000 | -0.126560000 |
| 1  | -1.855306000 | -2.833117000 | -1.015609000 |
| 1  | -0.601507000 | -3.757218000 | -0.147514000 |
| 1  | -1.874386000 | -2.885911000 | 0.748710000  |
| 6  | -0.275726000 | 1.918933000  | -0.048740000 |
| 1  | 0.092873000  | 2.361833000  | 0.880727000  |
| 1  | 0.245534000  | 2.393296000  | -0.884341000 |
| 1  | -1.341047000 | 2.127068000  | -0.138804000 |
| 6  | 1.978669000  | -0.193039000 | 1.838292000  |
| 8  | 2.016979000  | -0.239342000 | 2.977665000  |
| 6  | 2.086476000  | -0.126760000 | -1.841216000 |
| 8  | 2.190618000  | -0.131417000 | -2.977494000 |
| 6  | 2.752371000  | 1.589270000  | 0.055750000  |
| 7  | 3.222993000  | 2.657639000  | 0.095282000  |
| 6  | 3.609670000  | -1.049035000 | 0.027478000  |
| 7  | 4.605709000  | -1.664251000 | 0.043243000  |
| 6  | 5.822425000  | -2.377044000 | 0.061249000  |
| 1  | 5.854932000  | -3.039538000 | 0.929353000  |
| 1  | 5.917382000  | -2.977470000 | -0.846525000 |
| 1  | 6.663672000  | -1.681734000 | 0.115127000  |
| 6  | 3.748190000  | 3.966230000  | 0.145045000  |
| 1  | 4.319995000  | 4.102087000  | 1.065611000  |
| 1  | 4.403914000  | 4.136362000  | -0.711648000 |
| 1  | 2.933981000  | 4.694316000  | 0.120769000  |
| 25 | 1.979829000  | -0.152655000 | -0.002915000 |
| 31 | -2.909454000 | 0.071677000  | -0.076709000 |
| 17 | -3.253449000 | 1.225395000  | -1.913889000 |
| 17 | -3.232338000 | 1.243905000  | 1.752711000  |
| 17 | -4.273491000 | -1.644908000 | -0.056771000 |

**2b-GaCl<sub>3</sub>, TE = -5346.878061**

|    |              |              |              |
|----|--------------|--------------|--------------|
| 6  | 1.023102000  | 0.029373000  | 0.246032000  |
| 6  | -0.800289000 | -1.472833000 | 0.161504000  |
| 7  | 0.547109000  | -1.291250000 | 0.309901000  |
| 7  | 0.096276000  | 0.917409000  | 0.225883000  |
| 6  | -1.695576000 | 0.141508000  | -1.726494000 |
| 8  | -1.655346000 | 0.030560000  | -2.862834000 |
| 6  | -2.010311000 | 0.217202000  | 1.931906000  |
| 8  | -2.150679000 | 0.154247000  | 3.064740000  |
| 6  | -2.484454000 | 2.024519000  | -0.006140000 |
| 7  | -2.902084000 | 3.114167000  | -0.084379000 |
| 6  | -3.590272000 | -0.327443000 | -0.061324000 |
| 7  | -4.725126000 | -0.602327000 | -0.181747000 |
| 6  | -6.088310000 | -0.926198000 | -0.329544000 |
| 1  | -6.242045000 | -1.999282000 | -0.185675000 |
| 1  | -6.686010000 | -0.385013000 | 0.408320000  |
| 1  | -6.432816000 | -0.653806000 | -1.330347000 |
| 6  | -3.322576000 | 4.456826000  | -0.181438000 |
| 1  | -3.851208000 | 4.616033000  | -1.124079000 |
| 1  | -3.990972000 | 4.700425000  | 0.647543000  |
| 1  | -2.455463000 | 5.120987000  | -0.144964000 |
| 25 | -1.834364000 | 0.256646000  | 0.103107000  |
| 6  | 0.441654000  | 2.324920000  | 0.235017000  |
| 6  | 1.418827000  | -2.291902000 | 0.942645000  |
| 7  | -1.183520000 | -2.744270000 | -0.023674000 |
| 6  | -2.559010000 | -3.159717000 | 0.165793000  |
| 1  | -3.048024000 | -2.515192000 | 0.889962000  |
| 1  | -3.118621000 | -3.146424000 | -0.777387000 |
| 1  | -2.559898000 | -4.182042000 | 0.554898000  |
| 6  | -0.365445000 | -3.747087000 | -0.702565000 |
| 1  | 0.464381000  | -3.271771000 | -1.223049000 |
| 1  | 0.020622000  | -4.509506000 | -0.019251000 |
| 1  | -0.996461000 | -4.240033000 | -1.447969000 |
| 1  | 2.110060000  | -1.773120000 | 1.608117000  |
| 1  | 0.799092000  | -2.954529000 | 1.548214000  |
| 1  | 2.002836000  | -2.866100000 | 0.224740000  |
| 1  | -0.120645000 | 2.814881000  | 1.034396000  |
| 1  | 1.506579000  | 2.492210000  | 0.395420000  |
| 1  | 0.159874000  | 2.789990000  | -0.714444000 |
| 31 | 3.049640000  | 0.264517000  | -0.044595000 |
| 17 | 3.617622000  | -1.388559000 | -1.396698000 |
| 17 | 4.030558000  | 0.113017000  | 1.918158000  |
| 17 | 3.620911000  | 2.128281000  | -1.046705000 |

**2c-GaCl<sub>3</sub>, TE = -5327.508677**

|   |              |              |             |
|---|--------------|--------------|-------------|
| 6 | -1.023601000 | -0.278479000 | 0.205651000 |
|---|--------------|--------------|-------------|

|    |              |              |              |
|----|--------------|--------------|--------------|
| 6  | 0.868300000  | -1.658582000 | 0.079388000  |
| 7  | -0.473336000 | -1.573890000 | 0.175833000  |
| 7  | -0.127972000 | 0.641777000  | 0.262237000  |
| 6  | 2.039222000  | -0.041632000 | 1.886194000  |
| 8  | 2.206985000  | -0.134605000 | 3.012183000  |
| 6  | 1.677217000  | 0.106500000  | -1.773434000 |
| 8  | 1.630059000  | 0.102973000  | -2.913216000 |
| 6  | 2.413023000  | 1.874912000  | 0.061539000  |
| 7  | 2.783990000  | 2.982431000  | 0.045455000  |
| 6  | 3.602484000  | -0.451341000 | -0.141347000 |
| 7  | 4.743649000  | -0.690882000 | -0.269148000 |
| 6  | 6.119616000  | -0.955295000 | -0.424815000 |
| 1  | 6.291757000  | -2.031007000 | -0.517294000 |
| 1  | 6.496833000  | -0.461117000 | -1.323519000 |
| 1  | 6.672981000  | -0.584264000 | 0.441390000  |
| 6  | 3.141599000  | 4.347187000  | 0.021159000  |
| 1  | 3.799150000  | 4.575406000  | 0.862811000  |
| 1  | 3.660264000  | 4.579539000  | -0.911523000 |
| 1  | 2.243635000  | 4.965685000  | 0.092203000  |
| 25 | 1.827843000  | 0.073148000  | 0.063670000  |
| 6  | -0.519296000 | 2.034026000  | 0.379530000  |
| 6  | -1.317816000 | -2.758658000 | 0.327098000  |
| 8  | 1.227182000  | -2.927501000 | 0.036019000  |
| 6  | 2.598699000  | -3.288402000 | -0.047283000 |
| 1  | 3.035731000  | -2.913961000 | -0.973962000 |
| 1  | 3.150152000  | -2.906372000 | 0.812825000  |
| 1  | 2.610483000  | -4.377778000 | -0.044018000 |
| 1  | -2.256606000 | -2.468217000 | 0.789530000  |
| 1  | -1.533849000 | -3.212921000 | -0.641505000 |
| 1  | -0.806370000 | -3.482062000 | 0.959728000  |
| 1  | -0.338784000 | 2.556502000  | -0.564081000 |
| 1  | -1.568607000 | 2.155209000  | 0.650497000  |
| 1  | 0.089405000  | 2.497514000  | 1.159749000  |
| 31 | -3.037989000 | 0.125813000  | -0.036840000 |
| 17 | -3.739130000 | 0.930142000  | 1.882983000  |
| 17 | -4.274425000 | -1.584344000 | -0.636903000 |
| 17 | -3.142880000 | 1.592705000  | -1.673440000 |

**2'a-GaCl<sub>3</sub>, TE = -5596.096064**

|   |              |              |              |
|---|--------------|--------------|--------------|
| 6 | 0.629009000  | 0.007036000  | -0.065844000 |
| 6 | -0.543281000 | 2.033075000  | -0.033706000 |
| 1 | -0.427573000 | 3.121019000  | 0.003529000  |
| 7 | 0.641804000  | 1.429867000  | -0.036898000 |
| 7 | -0.584102000 | -0.432898000 | -0.061092000 |
| 6 | -2.123252000 | 0.970754000  | 1.818641000  |
| 8 | -2.161866000 | 1.019277000  | 2.957709000  |



|    |              |              |              |
|----|--------------|--------------|--------------|
| 6  | -2.232987000 | 0.995547000  | -1.859847000 |
| 8  | -2.337439000 | 1.066592000  | -2.994329000 |
| 6  | -3.485049000 | -0.381460000 | 0.036195000  |
| 7  | -4.290406000 | -1.222774000 | 0.092437000  |
| 6  | -3.251530000 | 2.418093000  | 0.016722000  |
| 7  | -3.921232000 | 3.377542000  | 0.041388000  |
| 6  | -4.755868000 | 4.513979000  | 0.070683000  |
| 1  | -4.524660000 | 5.124481000  | 0.946621000  |
| 1  | -4.602192000 | 5.113249000  | -0.829708000 |
| 1  | -5.803718000 | 4.207841000  | 0.118396000  |
| 6  | -5.101545000 | -2.376457000 | 0.152161000  |
| 1  | -5.561917000 | -2.453871000 | 1.139286000  |
| 1  | -5.886165000 | -2.319679000 | -0.605159000 |
| 1  | -4.480964000 | -3.258007000 | -0.028532000 |
| 25 | -2.112289000 | 0.948851000  | -0.023313000 |
| 6  | -0.841304000 | -1.832586000 | -0.000189000 |
| 6  | -1.388100000 | -2.483874000 | -1.102916000 |
| 6  | -0.605215000 | -2.528820000 | 1.180274000  |
| 6  | -1.674515000 | -3.838967000 | -1.027737000 |
| 1  | -1.551187000 | -1.934313000 | -2.023825000 |
| 6  | -0.905039000 | -3.884632000 | 1.250161000  |
| 1  | -0.167198000 | -2.015214000 | 2.029395000  |
| 6  | -1.438966000 | -4.543062000 | 0.150391000  |
| 1  | -2.062971000 | -4.352875000 | -1.901400000 |
| 1  | -0.699527000 | -4.428201000 | 2.166253000  |
| 1  | -1.653276000 | -5.605458000 | 0.202205000  |
| 6  | 1.861191000  | 2.192970000  | 0.046341000  |
| 6  | 2.639773000  | 2.121148000  | 1.192667000  |
| 6  | 2.204598000  | 3.027439000  | -1.009105000 |
| 6  | 3.790838000  | 2.894691000  | 1.273089000  |
| 1  | 2.365053000  | 1.450398000  | 1.999194000  |
| 6  | 3.351407000  | 3.802683000  | -0.914198000 |
| 1  | 1.593952000  | 3.042824000  | -1.905753000 |
| 6  | 4.145181000  | 3.735686000  | 0.225608000  |
| 1  | 4.413206000  | 2.831981000  | 2.158958000  |
| 1  | 3.634785000  | 4.446188000  | -1.740106000 |
| 1  | 5.048534000  | 4.332693000  | 0.292025000  |
| 31 | 2.369766000  | -1.117382000 | -0.123713000 |
| 17 | 2.891681000  | -1.367969000 | 2.008642000  |
| 17 | 2.072425000  | -3.044414000 | -1.106771000 |
| 17 | 3.925906000  | -0.069621000 | -1.252323000 |

**2'b-GaCl<sub>3</sub>**, TE = -5729.878996

|   |              |              |              |
|---|--------------|--------------|--------------|
| 6 | -0.686036000 | 0.126060000  | -0.016720000 |
| 6 | 0.625501000  | -1.860757000 | 0.019496000  |
| 7 | -0.624449000 | -1.277326000 | 0.080926000  |

|    |              |              |              |
|----|--------------|--------------|--------------|
| 7  | 0.477347000  | 0.678202000  | -0.085402000 |
| 6  | 2.110269000  | -0.602995000 | 1.758928000  |
| 8  | 2.132090000  | -0.701129000 | 2.897370000  |
| 6  | 2.175107000  | -0.602833000 | -1.911791000 |
| 8  | 2.226921000  | -0.703459000 | -3.049826000 |
| 6  | 3.279146000  | 0.977521000  | -0.015436000 |
| 7  | 3.989913000  | 1.901564000  | 0.047876000  |
| 6  | 3.646727000  | -1.600132000 | -0.022829000 |
| 7  | 4.658294000  | -2.192463000 | 0.030203000  |
| 6  | 5.891215000  | -2.871414000 | 0.094445000  |
| 1  | 5.747617000  | -3.939074000 | -0.092887000 |
| 1  | 6.579178000  | -2.473329000 | -0.655737000 |
| 1  | 6.337644000  | -2.745525000 | 1.084037000  |
| 6  | 4.636898000  | 3.154522000  | 0.113550000  |
| 1  | 5.091847000  | 3.286517000  | 1.097673000  |
| 1  | 5.415533000  | 3.213454000  | -0.650063000 |
| 1  | 3.900305000  | 3.944467000  | -0.053731000 |
| 25 | 2.130800000  | -0.525887000 | -0.075969000 |
| 6  | 0.610983000  | 2.095207000  | -0.071389000 |
| 6  | 0.998233000  | 2.771568000  | -1.225524000 |
| 6  | 0.430301000  | 2.791949000  | 1.119098000  |
| 6  | 1.176913000  | 4.146884000  | -1.190496000 |
| 1  | 1.127135000  | 2.220413000  | -2.150984000 |
| 6  | 0.617320000  | 4.169141000  | 1.148097000  |
| 1  | 0.119154000  | 2.257039000  | 2.010383000  |
| 6  | 0.990049000  | 4.850472000  | -0.003414000 |
| 1  | 1.441671000  | 4.675368000  | -2.100993000 |
| 1  | 0.448751000  | 4.710614000  | 2.073120000  |
| 1  | 1.114800000  | 5.928286000  | 0.016617000  |
| 6  | -1.850639000 | -2.027823000 | -0.044545000 |
| 6  | -2.756122000 | -2.078385000 | 1.006614000  |
| 6  | -2.105791000 | -2.697643000 | -1.235442000 |
| 6  | -3.922714000 | -2.818917000 | 0.866869000  |
| 1  | -2.558195000 | -1.525149000 | 1.918402000  |
| 6  | -3.267911000 | -3.446031000 | -1.363160000 |
| 1  | -1.403908000 | -2.618468000 | -2.059073000 |
| 6  | -4.175270000 | -3.510789000 | -0.311119000 |
| 1  | -4.639784000 | -2.843171000 | 1.680162000  |
| 1  | -3.475447000 | -3.961149000 | -2.295157000 |
| 1  | -5.089730000 | -4.084584000 | -0.418709000 |
| 7  | 0.694744000  | -3.185047000 | 0.206336000  |
| 6  | 1.826466000  | -3.943664000 | -0.292563000 |
| 1  | 2.343152000  | -3.385156000 | -1.066590000 |
| 1  | 2.527030000  | -4.200067000 | 0.510524000  |
| 1  | 1.446327000  | -4.872896000 | -0.729035000 |
| 6  | -0.203408000 | -4.006532000 | 1.017912000  |

|    |              |              |              |
|----|--------------|--------------|--------------|
| 1  | -0.707186000 | -3.403643000 | 1.768062000  |
| 1  | -0.951570000 | -4.532343000 | 0.418792000  |
| 1  | 0.419583000  | -4.742010000 | 1.534912000  |
| 31 | -2.497983000 | 1.154898000  | 0.000259000  |
| 17 | -4.068031000 | 0.180499000  | -1.183506000 |
| 17 | -2.407609000 | 3.179618000  | -0.824055000 |
| 17 | -2.970999000 | 1.234322000  | 2.164505000  |

**2'<sup>c</sup>-GaCl<sub>3</sub>, TE = -5710.511336**

|    |              |              |              |
|----|--------------|--------------|--------------|
| 6  | -0.700510000 | 0.068159000  | -0.131069000 |
| 6  | 0.590124000  | -1.905873000 | -0.053832000 |
| 7  | -0.645076000 | -1.336255000 | -0.100946000 |
| 7  | 0.473969000  | 0.602048000  | -0.128844000 |
| 6  | 2.056008000  | -0.659634000 | 1.798379000  |
| 8  | 2.061093000  | -0.706146000 | 2.938839000  |
| 6  | 2.210598000  | -0.743954000 | -1.875182000 |
| 8  | 2.305364000  | -0.844428000 | -3.009192000 |
| 6  | 3.290145000  | 0.838471000  | 0.001200000  |
| 7  | 4.010513000  | 1.753997000  | 0.051259000  |
| 6  | 3.578231000  | -1.781392000 | 0.043180000  |
| 7  | 4.561503000  | -2.418180000 | 0.095331000  |
| 6  | 5.761801000  | -3.155232000 | 0.155469000  |
| 1  | 5.550622000  | -4.227534000 | 0.128234000  |
| 1  | 6.400206000  | -2.900999000 | -0.694168000 |
| 1  | 6.296094000  | -2.925470000 | 1.080535000  |
| 6  | 4.685613000  | 2.993123000  | 0.102773000  |
| 1  | 5.140861000  | 3.126053000  | 1.086404000  |
| 1  | 5.466126000  | 3.024173000  | -0.660298000 |
| 1  | 3.965905000  | 3.795970000  | -0.075786000 |
| 25 | 2.105303000  | -0.648004000 | -0.042054000 |
| 6  | 0.627293000  | 2.017390000  | -0.081603000 |
| 6  | 1.038781000  | 2.706933000  | -1.219253000 |
| 6  | 0.435328000  | 2.695633000  | 1.117236000  |
| 6  | 1.232642000  | 4.079559000  | -1.159759000 |
| 1  | 1.172898000  | 2.168699000  | -2.151684000 |
| 6  | 0.637091000  | 4.070197000  | 1.170326000  |
| 1  | 0.099532000  | 2.151644000  | 1.993586000  |
| 6  | 1.035377000  | 4.765567000  | 0.035765000  |
| 1  | 1.516192000  | 4.619626000  | -2.057690000 |
| 1  | 0.459774000  | 4.598791000  | 2.101088000  |
| 1  | 1.171761000  | 5.841398000  | 0.075416000  |
| 6  | -1.842352000 | -2.141498000 | -0.045918000 |
| 6  | -2.525173000 | -2.259884000 | 1.155302000  |
| 6  | -2.273719000 | -2.803224000 | -1.187488000 |
| 6  | -3.671026000 | -3.044664000 | 1.207044000  |
| 1  | -2.183080000 | -1.718140000 | 2.030044000  |

|    |              |              |              |
|----|--------------|--------------|--------------|
| 6  | -3.411379000 | -3.593141000 | -1.124179000 |
| 1  | -1.732726000 | -2.680076000 | -2.119413000 |
| 6  | -4.110794000 | -3.713214000 | 0.072315000  |
| 1  | -4.224007000 | -3.122111000 | 2.136795000  |
| 1  | -3.764381000 | -4.100428000 | -2.015623000 |
| 1  | -5.009670000 | -4.319411000 | 0.115071000  |
| 8  | 0.467183000  | -3.211125000 | 0.001559000  |
| 6  | 1.611871000  | -4.050119000 | 0.066550000  |
| 1  | 2.237488000  | -3.913616000 | -0.816570000 |
| 1  | 2.184587000  | -3.845987000 | 0.972182000  |
| 1  | 1.219184000  | -5.065730000 | 0.094038000  |
| 31 | -2.510978000 | 1.084683000  | -0.044362000 |
| 17 | -4.146118000 | 0.056592000  | -1.071266000 |
| 17 | -2.406899000 | 3.073528000  | -0.947813000 |
| 17 | -2.845265000 | 1.202303000  | 2.139880000  |

**3a-GaCl<sub>3</sub>**, TE = -5251.757287

|    |              |              |              |
|----|--------------|--------------|--------------|
| 6  | -0.949256000 | 0.413872000  | -0.331209000 |
| 6  | 0.907644000  | 0.427219000  | -1.734319000 |
| 1  | 1.239596000  | 0.587542000  | -2.767635000 |
| 7  | -0.413231000 | 0.583183000  | -1.630244000 |
| 7  | -0.017143000 | 0.244675000  | 0.541150000  |
| 6  | -1.274723000 | 0.939230000  | -2.752824000 |
| 1  | -1.912543000 | 1.784613000  | -2.491137000 |
| 1  | -0.637863000 | 1.213679000  | -3.593817000 |
| 1  | -1.918834000 | 0.105663000  | -3.034951000 |
| 6  | -0.340017000 | 0.061110000  | 1.939824000  |
| 1  | -0.150561000 | -0.979184000 | 2.220867000  |
| 1  | 0.323277000  | 0.697359000  | 2.531386000  |
| 1  | -1.374061000 | 0.311772000  | 2.183413000  |
| 25 | 1.890622000  | 0.001681000  | -0.170797000 |
| 6  | 2.688472000  | -0.408646000 | 1.501109000  |
| 7  | 3.182086000  | -0.666922000 | 2.533967000  |
| 6  | 3.444819000  | -0.237331000 | -1.129236000 |
| 7  | 4.400118000  | -0.374492000 | -1.803262000 |
| 6  | 2.283441000  | 1.817984000  | 0.118985000  |
| 7  | 2.503367000  | 2.953492000  | 0.310083000  |
| 6  | 1.375022000  | -1.815558000 | -0.335157000 |
| 7  | 0.923514000  | -2.892207000 | -0.400633000 |
| 6  | 0.175589000  | -4.089873000 | -0.443436000 |
| 1  | 0.187635000  | -4.501839000 | -1.455221000 |
| 1  | 0.603057000  | -4.824383000 | 0.242976000  |
| 1  | -0.856979000 | -3.877971000 | -0.151701000 |
| 6  | 3.749025000  | -1.003763000 | 3.777772000  |
| 1  | 4.718707000  | -1.488099000 | 3.633987000  |
| 1  | 3.892171000  | -0.104803000 | 4.382907000  |

|    |              |              |              |
|----|--------------|--------------|--------------|
| 1  | 3.090788000  | -1.688460000 | 4.319252000  |
| 6  | 5.567619000  | -0.596682000 | -2.555715000 |
| 1  | 5.397461000  | -1.378212000 | -3.301761000 |
| 1  | 5.867252000  | 0.318197000  | -3.074658000 |
| 1  | 6.388389000  | -0.910917000 | -1.904143000 |
| 6  | 2.698676000  | 4.330155000  | 0.533089000  |
| 1  | 3.471016000  | 4.485264000  | 1.290845000  |
| 1  | 3.010210000  | 4.822541000  | -0.391864000 |
| 1  | 1.768833000  | 4.788812000  | 0.879309000  |
| 31 | -2.934989000 | 0.141056000  | 0.082902000  |
| 17 | -2.983859000 | -1.934213000 | 0.873928000  |
| 17 | -4.309900000 | 0.216851000  | -1.629372000 |
| 17 | -3.611965000 | 1.615199000  | 1.566689000  |

**3b-GaCl<sub>3</sub>**, TE = -5385.539736

|    |              |              |              |
|----|--------------|--------------|--------------|
| 6  | -1.064621000 | -0.146683000 | 0.466162000  |
| 6  | 0.790128000  | -1.558986000 | 0.084544000  |
| 7  | -0.557330000 | -1.451216000 | 0.337701000  |
| 7  | -0.166210000 | 0.766857000  | 0.527861000  |
| 25 | 1.743895000  | 0.201274000  | 0.046044000  |
| 6  | 2.351383000  | 1.967700000  | 0.010474000  |
| 7  | 2.751033000  | 3.073004000  | -0.018543000 |
| 6  | 3.411262000  | -0.304576000 | -0.545237000 |
| 7  | 4.496021000  | -0.542837000 | -0.945424000 |
| 6  | 1.102166000  | 0.364894000  | -1.728884000 |
| 7  | 0.593786000  | 0.486949000  | -2.776202000 |
| 6  | 2.217209000  | 0.039177000  | 1.854623000  |
| 7  | 2.491765000  | -0.060086000 | 2.992433000  |
| 6  | 2.745947000  | -0.167226000 | 4.372686000  |
| 1  | 2.987231000  | -1.200707000 | 4.636559000  |
| 1  | 3.587689000  | 0.470908000  | 4.654937000  |
| 1  | 1.865475000  | 0.142002000  | 4.942487000  |
| 6  | 3.145736000  | 4.423033000  | -0.058024000 |
| 1  | 3.842845000  | 4.639668000  | 0.756137000  |
| 1  | 3.638407000  | 4.648082000  | -1.008023000 |
| 1  | 2.274189000  | 5.075851000  | 0.045874000  |
| 6  | 5.779630000  | -0.737436000 | -1.483754000 |
| 1  | 5.983510000  | -1.804092000 | -1.622118000 |
| 1  | 5.867488000  | -0.241588000 | -2.455458000 |
| 1  | 6.542635000  | -0.326309000 | -0.815774000 |
| 6  | -0.221389000 | 0.680503000  | -3.913855000 |
| 1  | 0.169368000  | 1.500932000  | -4.520532000 |
| 1  | -0.242386000 | -0.228515000 | -4.519751000 |
| 1  | -1.237320000 | 0.922095000  | -3.588105000 |
| 6  | -0.562686000 | 2.148514000  | 0.703268000  |
| 6  | -1.339632000 | -2.515813000 | 0.977608000  |

|    |              |              |              |
|----|--------------|--------------|--------------|
| 7  | 1.201211000  | -2.813412000 | -0.185181000 |
| 6  | 2.601898000  | -3.171537000 | -0.116274000 |
| 1  | 2.683784000  | -4.187619000 | 0.284176000  |
| 1  | 3.074017000  | -3.149697000 | -1.106342000 |
| 1  | 3.124580000  | -2.487623000 | 0.545874000  |
| 6  | 0.383875000  | -3.814727000 | -0.859480000 |
| 1  | 0.080497000  | -4.633922000 | -0.198790000 |
| 1  | -0.503039000 | -3.353618000 | -1.290803000 |
| 1  | 0.976598000  | -4.238160000 | -1.676824000 |
| 1  | -1.600408000 | 2.250231000  | 1.031792000  |
| 1  | 0.088055000  | 2.598789000  | 1.457593000  |
| 1  | -0.436318000 | 2.700661000  | -0.232428000 |
| 1  | -0.655145000 | -3.168143000 | 1.524000000  |
| 1  | -2.020709000 | -2.058389000 | 1.695978000  |
| 1  | -1.937144000 | -3.099929000 | 0.278947000  |
| 31 | -3.047915000 | 0.209981000  | 0.146183000  |
| 17 | -4.022851000 | 0.948155000  | 1.969445000  |
| 17 | -4.086336000 | -1.576369000 | -0.624941000 |
| 17 | -3.125123000 | 1.700685000  | -1.498259000 |

**3c-GaCl<sub>3</sub>**, TE = -5366.174146

|    |              |              |              |
|----|--------------|--------------|--------------|
| 6  | 1.058657000  | -0.451199000 | 0.294284000  |
| 6  | -0.817582000 | -1.576857000 | -0.543820000 |
| 7  | 0.515942000  | -1.602898000 | -0.296947000 |
| 7  | 0.161162000  | 0.382819000  | 0.684329000  |
| 25 | -1.754467000 | 0.057685000  | 0.007408000  |
| 6  | -2.367917000 | 1.699155000  | 0.681877000  |
| 7  | -2.766400000 | 2.722559000  | 1.097355000  |
| 6  | -3.423420000 | -0.191175000 | -0.732440000 |
| 7  | -4.509984000 | -0.271273000 | -1.184866000 |
| 6  | -2.243665000 | -0.794793000 | 1.605689000  |
| 7  | -2.525975000 | -1.327638000 | 2.612734000  |
| 6  | -1.111387000 | 0.918571000  | -1.558303000 |
| 7  | -0.601343000 | 1.437382000  | -2.473479000 |
| 6  | 0.213010000  | 2.028614000  | -3.465431000 |
| 1  | 0.209461000  | 1.412235000  | -4.367429000 |
| 1  | -0.161643000 | 3.024286000  | -3.713654000 |
| 1  | 1.234663000  | 2.108607000  | -3.083216000 |
| 6  | -3.148755000 | 3.982120000  | 1.596742000  |
| 1  | -3.590149000 | 4.587237000  | 0.800344000  |
| 1  | -3.884546000 | 3.865847000  | 2.396849000  |
| 1  | -2.277812000 | 4.509955000  | 1.995351000  |
| 6  | -5.811637000 | -0.245321000 | -1.716976000 |
| 1  | -5.930667000 | 0.605562000  | -2.394493000 |
| 1  | -6.018872000 | -1.162706000 | -2.276477000 |
| 1  | -6.551150000 | -0.156491000 | -0.915530000 |

|    |              |              |              |
|----|--------------|--------------|--------------|
| 6  | -2.778064000 | -1.954502000 | 3.848332000  |
| 1  | -3.700424000 | -1.567087000 | 4.288951000  |
| 1  | -2.881112000 | -3.034404000 | 3.712302000  |
| 1  | -1.952071000 | -1.766706000 | 4.539460000  |
| 6  | 0.548334000  | 1.603044000  | 1.360138000  |
| 6  | 1.322445000  | -2.803652000 | -0.499305000 |
| 8  | -1.168145000 | -2.741243000 | -1.074915000 |
| 6  | -2.525815000 | -2.971457000 | -1.417033000 |
| 1  | -2.840361000 | -2.289815000 | -2.208384000 |
| 1  | -2.566323000 | -4.001810000 | -1.771021000 |
| 1  | -3.170103000 | -2.844815000 | -0.545828000 |
| 1  | 2.263273000  | -2.695181000 | 0.033119000  |
| 1  | 0.782447000  | -3.668195000 | -0.112345000 |
| 1  | 1.538436000  | -2.963363000 | -1.557171000 |
| 1  | -0.101662000 | 1.733173000  | 2.229598000  |
| 1  | 1.585318000  | 1.588186000  | 1.703285000  |
| 1  | 0.410052000  | 2.460797000  | 0.695973000  |
| 31 | 3.045719000  | 0.035892000  | 0.171510000  |
| 17 | 3.056804000  | 1.998682000  | -0.873874000 |
| 17 | 4.258089000  | -1.304069000 | -1.080938000 |
| 17 | 3.920033000  | 0.175264000  | 2.181354000  |

**3'a-GaCl<sub>3</sub>, TE = -5634.760432**

|    |              |              |              |
|----|--------------|--------------|--------------|
| 6  | -0.723102000 | -0.002188000 | -0.010126000 |
| 6  | 0.541041000  | 1.967133000  | -0.010866000 |
| 1  | 0.460452000  | 3.059131000  | 0.033849000  |
| 7  | -0.682821000 | 1.410106000  | 0.008222000  |
| 7  | 0.472935000  | -0.496259000 | 0.002860000  |
| 25 | 2.050214000  | 0.842601000  | -0.024761000 |
| 6  | 3.411450000  | -0.489010000 | 0.027637000  |
| 7  | 4.231492000  | -1.323864000 | 0.083090000  |
| 6  | 3.201377000  | 2.278654000  | -0.050912000 |
| 7  | 3.878319000  | 3.240507000  | -0.066444000 |
| 6  | 2.072699000  | 0.826272000  | 1.862154000  |
| 7  | 2.066752000  | 0.800591000  | 3.032267000  |
| 6  | 2.063195000  | 0.769415000  | -1.912306000 |
| 7  | 2.037897000  | 0.716433000  | -3.081751000 |
| 6  | 1.893801000  | 0.640690000  | -4.482077000 |
| 1  | 1.733955000  | 1.638697000  | -4.897812000 |
| 1  | 2.792338000  | 0.210843000  | -4.931331000 |
| 1  | 1.035431000  | 0.012377000  | -4.732997000 |
| 6  | 5.012400000  | -2.495310000 | 0.156446000  |
| 1  | 5.743067000  | -2.512807000 | -0.655897000 |
| 1  | 5.546764000  | -2.531013000 | 1.108910000  |
| 1  | 4.362078000  | -3.371365000 | 0.076938000  |
| 6  | 4.736419000  | 4.355363000  | -0.086886000 |

|    |              |              |              |
|----|--------------|--------------|--------------|
| 1  | 4.520474000  | 4.986176000  | -0.953676000 |
| 1  | 4.604289000  | 4.953737000  | 0.818826000  |
| 1  | 5.780073000  | 4.032414000  | -0.142199000 |
| 6  | 1.995494000  | 0.734621000  | 4.437777000  |
| 1  | 2.956599000  | 1.013229000  | 4.877014000  |
| 1  | 1.226004000  | 1.416928000  | 4.807461000  |
| 1  | 1.744675000  | -0.282013000 | 4.750686000  |
| 6  | 0.662273000  | -1.898354000 | 0.109825000  |
| 6  | 1.311151000  | -2.595465000 | -0.908427000 |
| 6  | 0.254665000  | -2.572451000 | 1.257631000  |
| 6  | 1.524146000  | -3.959956000 | -0.786561000 |
| 1  | 1.615775000  | -2.062962000 | -1.802254000 |
| 6  | 0.480697000  | -3.939118000 | 1.377633000  |
| 1  | -0.259041000 | -2.027869000 | 2.042385000  |
| 6  | 1.114567000  | -4.637772000 | 0.359419000  |
| 1  | 1.994513000  | -4.503761000 | -1.600340000 |
| 1  | 0.140042000  | -4.458976000 | 2.267090000  |
| 1  | 1.274195000  | -5.707424000 | 0.447537000  |
| 6  | -1.863766000 | 2.215203000  | 0.140839000  |
| 6  | -2.683576000 | 2.068739000  | 1.252030000  |
| 6  | -2.141767000 | 3.173536000  | -0.826697000 |
| 6  | -3.802295000 | 2.882077000  | 1.383307000  |
| 1  | -2.465663000 | 1.307557000  | 1.993006000  |
| 6  | -3.253109000 | 3.990840000  | -0.680563000 |
| 1  | -1.504338000 | 3.253037000  | -1.700947000 |
| 6  | -4.086436000 | 3.845016000  | 0.423371000  |
| 1  | -4.454800000 | 2.754822000  | 2.240354000  |
| 1  | -3.480662000 | 4.729683000  | -1.441778000 |
| 1  | -4.963986000 | 4.474283000  | 0.528107000  |
| 31 | -2.486423000 | -1.050027000 | -0.205036000 |
| 17 | -3.932078000 | 0.106900000  | -1.387531000 |
| 17 | -3.226368000 | -1.431083000 | 1.848055000  |
| 17 | -2.190873000 | -2.927530000 | -1.295898000 |

**3'b-GaCl<sub>3</sub>, TE = -5768.538928**

|    |              |              |              |
|----|--------------|--------------|--------------|
| 6  | -0.762451000 | 0.143317000  | 0.142936000  |
| 6  | 0.526562000  | -1.853487000 | 0.005352000  |
| 7  | -0.727721000 | -1.256958000 | -0.001522000 |
| 7  | 0.409312000  | 0.672269000  | 0.235853000  |
| 25 | 2.037869000  | -0.547339000 | -0.016312000 |
| 6  | 3.212461000  | 0.908244000  | -0.143524000 |
| 7  | 3.950665000  | 1.816754000  | -0.229182000 |
| 6  | 3.468184000  | -1.645428000 | -0.385894000 |
| 7  | 4.427088000  | -2.278782000 | -0.654566000 |
| 6  | 1.633620000  | -0.407412000 | -1.856967000 |
| 7  | 1.284293000  | -0.286234000 | -2.968571000 |



|   |              |              |              |
|---|--------------|--------------|--------------|
| 6 | 2.322018000  | -0.660548000 | 1.837794000  |
| 7 | 2.491207000  | -0.733699000 | 2.997959000  |
| 6 | 2.665452000  | -0.768842000 | 4.394544000  |
| 1 | 2.939074000  | -1.776682000 | 4.718663000  |
| 1 | 3.457534000  | -0.077864000 | 4.695753000  |
| 1 | 1.738602000  | -0.480022000 | 4.897674000  |
| 6 | 4.586730000  | 3.073667000  | -0.293656000 |
| 1 | 5.350291000  | 3.151029000  | 0.484813000  |
| 1 | 5.067141000  | 3.204127000  | -1.266925000 |
| 1 | 3.846597000  | 3.865759000  | -0.150059000 |
| 6 | 5.643047000  | -2.878747000 | -1.027788000 |
| 1 | 5.598760000  | -3.962840000 | -0.885078000 |
| 1 | 5.860642000  | -2.678739000 | -2.081404000 |
| 1 | 6.466158000  | -2.485198000 | -0.423532000 |
| 6 | 0.665805000  | -0.039665000 | -4.213914000 |
| 1 | 1.224636000  | 0.718343000  | -4.768334000 |
| 1 | 0.634589000  | -0.956736000 | -4.807370000 |
| 1 | -0.355360000 | 0.315724000  | -4.046097000 |
| 6 | 0.585981000  | 2.078605000  | 0.310204000  |
| 6 | 0.945693000  | 2.665616000  | 1.521035000  |
| 6 | 0.492632000  | 2.861329000  | -0.837299000 |
| 6 | 1.181401000  | 4.031466000  | 1.586471000  |
| 1 | 1.019454000  | 2.045107000  | 2.407464000  |
| 6 | 0.736448000  | 4.227317000  | -0.766905000 |
| 1 | 0.200283000  | 2.398735000  | -1.773541000 |
| 6 | 1.080426000  | 4.818422000  | 0.442730000  |
| 1 | 1.430994000  | 4.487467000  | 2.539538000  |
| 1 | 0.632404000  | 4.834947000  | -1.660160000 |
| 1 | 1.250275000  | 5.888785000  | 0.499505000  |
| 6 | -1.952041000 | -1.987326000 | 0.213261000  |
| 6 | -2.898937000 | -2.106522000 | -0.795980000 |
| 6 | -2.165252000 | -2.580820000 | 1.452435000  |
| 6 | -4.054471000 | -2.842335000 | -0.569370000 |
| 1 | -2.736876000 | -1.607720000 | -1.745601000 |
| 6 | -3.319396000 | -3.320862000 | 1.671552000  |
| 1 | -1.427475000 | -2.454668000 | 2.237981000  |
| 6 | -4.262333000 | -3.458128000 | 0.658491000  |
| 1 | -4.800819000 | -2.920009000 | -1.352596000 |
| 1 | -3.490129000 | -3.778225000 | 2.640652000  |
| 1 | -5.168863000 | -4.027712000 | 0.834601000  |
| 7 | 0.560929000  | -3.189281000 | -0.141869000 |
| 6 | 1.711896000  | -3.939421000 | 0.321722000  |
| 1 | 1.351950000  | -4.819481000 | 0.866878000  |
| 1 | 2.335653000  | -4.280237000 | -0.512673000 |
| 1 | 2.307769000  | -3.326546000 | 0.990967000  |
| 6 | -0.385910000 | -4.027961000 | -0.871245000 |

|    |              |              |              |
|----|--------------|--------------|--------------|
| 1  | -1.115843000 | -4.516576000 | -0.218827000 |
| 1  | -0.916303000 | -3.449941000 | -1.623169000 |
| 1  | 0.197047000  | -4.798203000 | -1.385440000 |
| 31 | -2.531242000 | 1.196723000  | -0.021405000 |
| 17 | -2.499268000 | 3.266026000  | 0.690497000  |
| 17 | -4.272007000 | 0.337062000  | 1.003482000  |
| 17 | -2.763563000 | 1.168741000  | -2.251919000 |

**3'<sup>c</sup>-GaCl<sub>3</sub>, TE = -5749.175088**

|    |              |              |              |
|----|--------------|--------------|--------------|
| 6  | 0.770931000  | 0.086806000  | -0.261842000 |
| 6  | -0.515811000 | -1.884446000 | -0.072244000 |
| 7  | 0.725403000  | -1.311219000 | -0.186213000 |
| 7  | -0.407186000 | 0.613671000  | -0.277817000 |
| 25 | -2.013712000 | -0.647283000 | 0.056806000  |
| 6  | -3.208414000 | 0.809535000  | 0.165333000  |
| 7  | -3.940448000 | 1.721470000  | 0.238327000  |
| 6  | -3.415432000 | -1.771964000 | 0.458560000  |
| 7  | -4.360980000 | -2.423916000 | 0.726965000  |
| 6  | -1.573172000 | -0.445117000 | 1.888233000  |
| 7  | -1.198402000 | -0.293260000 | 2.986018000  |
| 6  | -2.352127000 | -0.813059000 | -1.784480000 |
| 7  | -2.553904000 | -0.917363000 | -2.935705000 |
| 6  | -2.759512000 | -1.010661000 | -4.325787000 |
| 1  | -3.024576000 | -2.034730000 | -4.601961000 |
| 1  | -3.568606000 | -0.343508000 | -4.634627000 |
| 1  | -1.848476000 | -0.728811000 | -4.860304000 |
| 6  | -4.586474000 | 2.973897000  | 0.298294000  |
| 1  | -5.391252000 | 3.018780000  | -0.439727000 |
| 1  | -5.013460000 | 3.129144000  | 1.292281000  |
| 1  | -3.862056000 | 3.766181000  | 0.090794000  |
| 6  | -5.569201000 | -3.048081000 | 1.088590000  |
| 1  | -6.325864000 | -2.892935000 | 0.313788000  |
| 1  | -5.423791000 | -4.124689000 | 1.217973000  |
| 1  | -5.945677000 | -2.634816000 | 2.029137000  |
| 6  | -0.556441000 | -0.041375000 | 4.218661000  |
| 1  | -1.124303000 | 0.693077000  | 4.794696000  |
| 1  | -0.482510000 | -0.964678000 | 4.798238000  |
| 1  | 0.448594000  | 0.345886000  | 4.026925000  |
| 6  | -0.585714000 | 2.021743000  | -0.312708000 |
| 6  | -1.006670000 | 2.628001000  | -1.494436000 |
| 6  | -0.426059000 | 2.787225000  | 0.838709000  |
| 6  | -1.236011000 | 3.996074000  | -1.529109000 |
| 1  | -1.130718000 | 2.020546000  | -2.384479000 |
| 6  | -0.663438000 | 4.155975000  | 0.799230000  |
| 1  | -0.083841000 | 2.311583000  | 1.750619000  |
| 6  | -1.067368000 | 4.766347000  | -0.381782000 |

|    |              |              |              |
|----|--------------|--------------|--------------|
| 1  | -1.532512000 | 4.466753000  | -2.461393000 |
| 1  | -0.507163000 | 4.750134000  | 1.693871000  |
| 1  | -1.231630000 | 5.838562000  | -0.414760000 |
| 6  | 1.921994000  | -2.113192000 | -0.214555000 |
| 6  | 2.622904000  | -2.337059000 | 0.961573000  |
| 6  | 2.340160000  | -2.678875000 | -1.411536000 |
| 6  | 3.764411000  | -3.128432000 | 0.934544000  |
| 1  | 2.293344000  | -1.866189000 | 1.880954000  |
| 6  | 3.477163000  | -3.473340000 | -1.431063000 |
| 1  | 1.782501000  | -2.481237000 | -2.320697000 |
| 6  | 4.189530000  | -3.699130000 | -0.258180000 |
| 1  | 4.328728000  | -3.286834000 | 1.847292000  |
| 1  | 3.816663000  | -3.905331000 | -2.366591000 |
| 1  | 5.085865000  | -4.310370000 | -0.277981000 |
| 8  | -0.366939000 | -3.195602000 | -0.055447000 |
| 6  | -1.505606000 | -4.036202000 | 0.042869000  |
| 1  | -2.227641000 | -3.801131000 | -0.740038000 |
| 1  | -1.126353000 | -5.050512000 | -0.081656000 |
| 1  | -1.975414000 | -3.928800000 | 1.021529000  |
| 31 | 2.550750000  | 1.105279000  | -0.057335000 |
| 17 | 4.331774000  | 0.140398000  | -0.885609000 |
| 17 | 2.532901000  | 3.118172000  | -0.913355000 |
| 17 | 2.668617000  | 1.171046000  | 2.179238000  |

**4'a-GaCl<sub>3</sub>, TE = -5748.079515**

|   |              |              |              |
|---|--------------|--------------|--------------|
| 6 | 0.638627000  | 0.062453000  | 0.097641000  |
| 6 | -0.559655000 | 2.108903000  | -0.416151000 |
| 1 | -0.487898000 | 2.444293000  | -1.457866000 |
| 7 | -0.564210000 | -0.464371000 | 0.180939000  |
| 1 | -0.628658000 | 3.011023000  | 0.201905000  |
| 6 | -3.247351000 | 2.169641000  | -0.560205000 |
| 6 | -1.961181000 | 1.278857000  | 1.640210000  |
| 6 | -1.797818000 | 0.308037000  | -1.934423000 |
| 7 | -3.941528000 | 3.067292000  | -0.839277000 |
| 7 | -1.407801000 | -0.052757000 | -2.970357000 |
| 7 | -1.771101000 | 1.563949000  | 2.753956000  |
| 6 | -1.414469000 | 1.885108000  | 4.081259000  |
| 1 | -0.411713000 | 2.318200000  | 4.096763000  |
| 1 | -2.123627000 | 2.605546000  | 4.494266000  |
| 1 | -1.423877000 | 0.981736000  | 4.694870000  |
| 6 | -4.759113000 | 4.159396000  | -1.194589000 |
| 1 | -4.291803000 | 5.094907000  | -0.878286000 |
| 1 | -4.899836000 | 4.182908000  | -2.277743000 |
| 1 | -5.735412000 | 4.069555000  | -0.712475000 |
| 6 | -0.702778000 | -0.589435000 | -4.076032000 |
| 1 | -0.237923000 | 0.220019000  | -4.641895000 |

|    |              |              |              |
|----|--------------|--------------|--------------|
| 1  | 0.073781000  | -1.262641000 | -3.700273000 |
| 1  | -1.388589000 | -1.137057000 | -4.725146000 |
| 6  | -0.718316000 | -1.829770000 | 0.508018000  |
| 6  | -1.500393000 | -2.680628000 | -0.278350000 |
| 6  | -0.121368000 | -2.342679000 | 1.660603000  |
| 6  | -1.668087000 | -4.010485000 | 0.075986000  |
| 1  | -1.940713000 | -2.301591000 | -1.193033000 |
| 6  | -0.283869000 | -3.679155000 | 2.007526000  |
| 1  | 0.488171000  | -1.690532000 | 2.276066000  |
| 6  | -1.061558000 | -4.518765000 | 1.222333000  |
| 1  | -2.249212000 | -4.665930000 | -0.566298000 |
| 1  | 0.210361000  | -4.061825000 | 2.894578000  |
| 1  | -1.181569000 | -5.563747000 | 1.488643000  |
| 26 | -2.093811000 | 0.812082000  | -0.150973000 |
| 6  | -3.449001000 | -0.427113000 | 0.190429000  |
| 7  | -4.295900000 | -1.185727000 | 0.454344000  |
| 6  | -5.128486000 | -2.273663000 | 0.792299000  |
| 1  | -5.872317000 | -2.434385000 | 0.008881000  |
| 1  | -4.512979000 | -3.171105000 | 0.900164000  |
| 1  | -5.642697000 | -2.072544000 | 1.734588000  |
| 7  | 0.678707000  | 1.405717000  | -0.058888000 |
| 6  | 1.830947000  | 2.162623000  | 0.246876000  |
| 6  | 2.112699000  | 3.333806000  | -0.459007000 |
| 6  | 2.666721000  | 1.784279000  | 1.299500000  |
| 6  | 3.229024000  | 4.090615000  | -0.134601000 |
| 1  | 1.471111000  | 3.635642000  | -1.278623000 |
| 6  | 3.793497000  | 2.535832000  | 1.602894000  |
| 1  | 2.443924000  | 0.891522000  | 1.873911000  |
| 6  | 4.079991000  | 3.694249000  | 0.891887000  |
| 1  | 3.445018000  | 4.990517000  | -0.701971000 |
| 1  | 4.446267000  | 2.210775000  | 2.406419000  |
| 1  | 4.958699000  | 4.282986000  | 1.133006000  |
| 31 | 2.314775000  | -1.053678000 | -0.346626000 |
| 17 | 3.671705000  | 0.127730000  | -1.611662000 |
| 17 | 1.633014000  | -2.692803000 | -1.676517000 |
| 17 | 3.366868000  | -1.829028000 | 1.427627000  |

**4'b-GaCl<sub>3</sub>, TE = -8895.571549**

|   |              |              |              |
|---|--------------|--------------|--------------|
| 6 | -0.796338000 | -0.081245000 | 0.145251000  |
| 6 | 0.516529000  | -2.078869000 | -0.360031000 |
| 1 | 0.442053000  | -2.439763000 | -1.392382000 |
| 7 | 0.362198000  | 0.540240000  | 0.242718000  |
| 1 | 0.629407000  | -2.962886000 | 0.276370000  |
| 6 | 3.416701000  | -1.953813000 | -0.614010000 |
| 6 | 2.081421000  | -1.156681000 | 1.749438000  |
| 6 | 1.647048000  | -0.145137000 | -2.026113000 |

|    |              |              |              |
|----|--------------|--------------|--------------|
| 7  | 4.194650000  | -2.775701000 | -0.912464000 |
| 7  | 1.172013000  | 0.187352000  | -3.034420000 |
| 7  | 1.983444000  | -1.457184000 | 2.871117000  |
| 6  | 1.771307000  | -1.797204000 | 4.223880000  |
| 1  | 0.795312000  | -2.275125000 | 4.333556000  |
| 1  | 2.548430000  | -2.486571000 | 4.560791000  |
| 1  | 1.799847000  | -0.895966000 | 4.840118000  |
| 6  | 5.110760000  | -3.774615000 | -1.296825000 |
| 1  | 4.927248000  | -4.690506000 | -0.729677000 |
| 1  | 5.001806000  | -3.992262000 | -2.362170000 |
| 1  | 6.133830000  | -3.440248000 | -1.107536000 |
| 6  | 0.387719000  | 0.666672000  | -4.112595000 |
| 1  | -0.021505000 | -0.177748000 | -4.670066000 |
| 1  | -0.431444000 | 1.266818000  | -3.704439000 |
| 1  | 1.003285000  | 1.276612000  | -4.776279000 |
| 6  | 0.400101000  | 1.915486000  | 0.569386000  |
| 6  | 1.133970000  | 2.820997000  | -0.201138000 |
| 6  | -0.265882000 | 2.382454000  | 1.703036000  |
| 6  | 1.187595000  | 4.160972000  | 0.149805000  |
| 1  | 1.625339000  | 2.472628000  | -1.101871000 |
| 6  | -0.217586000 | 3.728874000  | 2.045931000  |
| 1  | -0.836061000 | 1.686574000  | 2.308048000  |
| 6  | 0.512658000  | 4.624033000  | 1.276816000  |
| 1  | 1.732111000  | 4.857924000  | -0.480746000 |
| 1  | -0.762650000 | 4.074726000  | 2.918167000  |
| 1  | 0.543786000  | 5.675979000  | 1.540848000  |
| 6  | 3.414175000  | 0.793112000  | 0.153223000  |
| 7  | 4.174670000  | 1.649834000  | 0.382136000  |
| 6  | 4.894850000  | 2.824391000  | 0.685913000  |
| 1  | 5.553264000  | 3.085778000  | -0.145529000 |
| 1  | 4.189102000  | 3.641120000  | 0.860927000  |
| 1  | 5.499660000  | 2.671502000  | 1.582458000  |
| 7  | -0.753311000 | -1.423962000 | -0.004510000 |
| 6  | -1.869350000 | -2.237429000 | 0.298899000  |
| 6  | -2.091153000 | -3.423476000 | -0.403077000 |
| 6  | -2.727008000 | -1.894683000 | 1.345524000  |
| 6  | -3.171736000 | -4.230945000 | -0.080298000 |
| 1  | -1.432540000 | -3.698238000 | -1.218396000 |
| 6  | -3.819036000 | -2.696697000 | 1.646333000  |
| 1  | -2.548379000 | -0.991199000 | 1.917940000  |
| 6  | -4.046372000 | -3.870449000 | 0.939515000  |
| 1  | -3.341532000 | -5.142736000 | -0.644290000 |
| 1  | -4.490317000 | -2.399306000 | 2.445232000  |
| 1  | -4.897323000 | -4.499273000 | 1.178954000  |
| 44 | 2.082020000  | -0.650723000 | -0.147165000 |
| 31 | -2.530028000 | 0.909281000  | -0.345410000 |

|    |              |              |              |
|----|--------------|--------------|--------------|
| 17 | -3.751625000 | -0.367413000 | -1.649658000 |
| 17 | -1.939777000 | 2.584684000  | -1.670019000 |
| 17 | -3.696754000 | 1.625537000  | 1.373072000  |

**5a-GaCl<sub>3</sub>**, TE = - 5787.273151

|    |              |              |              |
|----|--------------|--------------|--------------|
| 6  | 1.319622000  | 1.291931000  | -0.972713000 |
| 6  | -0.765603000 | -0.000448000 | -0.476887000 |
| 6  | 1.319646000  | -1.293031000 | -0.972192000 |
| 7  | -0.105393000 | -1.155697000 | -0.614229000 |
| 7  | -0.105396000 | 1.154774000  | -0.614628000 |
| 6  | -0.743867000 | -2.402404000 | -0.317676000 |
| 6  | -0.793608000 | -3.392641000 | -1.297714000 |
| 6  | -1.238024000 | -2.660202000 | 0.953887000  |
| 6  | -1.358955000 | -4.623110000 | -1.007732000 |
| 1  | -0.413081000 | -3.178352000 | -2.290353000 |
| 6  | -1.817085000 | -3.893188000 | 1.236165000  |
| 1  | -1.196085000 | -1.888737000 | 1.712030000  |
| 6  | -1.875850000 | -4.877102000 | 0.260507000  |
| 1  | -1.417470000 | -5.382327000 | -1.780917000 |
| 1  | -2.226550000 | -4.076509000 | 2.224043000  |
| 1  | -2.331656000 | -5.836929000 | 0.480185000  |
| 6  | -0.743787000 | 2.401613000  | -0.318454000 |
| 6  | -0.793366000 | 3.391614000  | -1.298743000 |
| 6  | -1.237920000 | 2.659833000  | 0.953034000  |
| 6  | -1.358498000 | 4.622258000  | -1.009100000 |
| 1  | -0.412843000 | 3.177032000  | -2.291318000 |
| 6  | -1.816738000 | 3.893011000  | 1.234991000  |
| 1  | -1.196097000 | 1.888569000  | 1.711387000  |
| 6  | -1.875333000 | 4.876682000  | 0.259077000  |
| 1  | -1.416865000 | 5.381287000  | -1.782480000 |
| 1  | -2.226172000 | 4.076665000  | 2.222820000  |
| 1  | -2.330945000 | 5.836657000  | 0.478505000  |
| 1  | 1.402000000  | -1.155459000 | -2.055349000 |
| 1  | 1.566443000  | -2.334037000 | -0.763319000 |
| 1  | 1.566544000  | 2.333015000  | -0.764394000 |
| 1  | 1.401617000  | 1.154047000  | -2.055881000 |
| 26 | 2.599087000  | -0.000343000 | -0.037032000 |
| 6  | 1.543628000  | -0.000387000 | 1.490281000  |
| 7  | 0.911942000  | -0.000201000 | 2.471250000  |
| 6  | 3.572775000  | 1.404696000  | 0.646407000  |
| 7  | 4.149626000  | 2.336159000  | 1.060959000  |
| 6  | 3.576960000  | 0.000231000  | -1.595420000 |
| 7  | 4.158408000  | 0.001093000  | -2.610325000 |
| 6  | 3.573673000  | -1.404918000 | 0.646170000  |
| 7  | 4.151459000  | -2.335954000 | 1.060354000  |
| 6  | 4.783846000  | 3.490337000  | 1.562221000  |

|    |              |              |              |
|----|--------------|--------------|--------------|
| 1  | 5.385003000  | 3.240266000  | 2.440088000  |
| 1  | 5.437318000  | 3.921028000  | 0.799600000  |
| 1  | 4.036041000  | 4.235213000  | 1.845820000  |
| 6  | 0.099949000  | 0.000192000  | 3.627544000  |
| 1  | 0.309604000  | -0.888860000 | 4.226986000  |
| 1  | 0.308476000  | 0.890462000  | 4.225573000  |
| 1  | -0.955624000 | -0.000669000 | 3.338069000  |
| 6  | 4.788071000  | -3.488517000 | 1.562290000  |
| 1  | 5.444608000  | -3.916668000 | 0.800879000  |
| 1  | 5.386452000  | -3.237153000 | 2.441682000  |
| 1  | 4.041924000  | -4.235871000 | 1.843735000  |
| 6  | 4.842826000  | 0.000848000  | -3.842655000 |
| 1  | 4.953033000  | -1.022001000 | -4.210738000 |
| 1  | 4.285110000  | 0.582902000  | -4.580055000 |
| 1  | 5.835055000  | 0.442044000  | -3.721168000 |
| 31 | -2.835822000 | -0.000381000 | -0.260229000 |
| 17 | -3.288592000 | 0.000121000  | 1.930461000  |
| 17 | -3.796801000 | 1.723935000  | -1.215407000 |
| 17 | -3.797119000 | -1.724913000 | -1.214651000 |

**5b-GaCl<sub>3</sub>**, TE = -8934.767330

|   |              |              |              |
|---|--------------|--------------|--------------|
| 6 | -1.129940000 | 1.325845000  | 1.019317000  |
| 6 | 0.939372000  | -0.000011000 | 0.497492000  |
| 6 | -1.129964000 | -1.325902000 | 1.019239000  |
| 7 | 0.288983000  | -1.160878000 | 0.641217000  |
| 7 | 0.288990000  | 1.160856000  | 0.641245000  |
| 6 | 0.937095000  | -2.401592000 | 0.334852000  |
| 6 | 1.017455000  | -3.388287000 | 1.316206000  |
| 6 | 1.406917000  | -2.657176000 | -0.946011000 |
| 6 | 1.588577000  | -4.613765000 | 1.017415000  |
| 1 | 0.655702000  | -3.175330000 | 2.316094000  |
| 6 | 1.992529000  | -3.885087000 | -1.237159000 |
| 1 | 1.340658000  | -1.888072000 | -1.704776000 |
| 6 | 2.081281000  | -4.865831000 | -0.260773000 |
| 1 | 1.670847000  | -5.370262000 | 1.791048000  |
| 1 | 2.383247000  | -4.066927000 | -2.232837000 |
| 1 | 2.541850000  | -5.821651000 | -0.487747000 |
| 6 | 0.937073000  | 2.401575000  | 0.334844000  |
| 6 | 1.017453000  | 3.388282000  | 1.316183000  |
| 6 | 1.406838000  | 2.657157000  | -0.946042000 |
| 6 | 1.588545000  | 4.613767000  | 1.017358000  |
| 1 | 0.655748000  | 3.175330000  | 2.316089000  |
| 6 | 1.992419000  | 3.885074000  | -1.237226000 |
| 1 | 1.340530000  | 1.888057000  | -1.704805000 |
| 6 | 2.081196000  | 4.865829000  | -0.260850000 |
| 1 | 1.670832000  | 5.370270000  | 1.790983000  |

|    |              |              |              |
|----|--------------|--------------|--------------|
| 1  | 2.383086000  | 4.066916000  | -2.232923000 |
| 1  | 2.541742000  | 5.821652000  | -0.487853000 |
| 1  | -1.203027000 | -1.177087000 | 2.101600000  |
| 1  | -1.357874000 | -2.373370000 | 0.825812000  |
| 1  | -1.357857000 | 2.373331000  | 0.825996000  |
| 1  | -1.202981000 | 1.176929000  | 2.101666000  |
| 6  | -1.381238000 | -0.000066000 | -1.588656000 |
| 7  | -0.731684000 | -0.000199000 | -2.556925000 |
| 6  | -3.561447000 | 1.492392000  | -0.697942000 |
| 7  | -4.135499000 | 2.427281000  | -1.109830000 |
| 6  | -3.531602000 | -0.000062000 | 1.705339000  |
| 7  | -4.100548000 | -0.000155000 | 2.726648000  |
| 6  | -3.561659000 | -1.492165000 | -0.698045000 |
| 7  | -4.135929000 | -2.426888000 | -1.110008000 |
| 6  | -4.779951000 | 3.573882000  | -1.614579000 |
| 1  | -5.401769000 | 3.310710000  | -2.474184000 |
| 1  | -5.414880000 | 4.017417000  | -0.843642000 |
| 1  | -4.038370000 | 4.313412000  | -1.927158000 |
| 6  | 0.099993000  | -0.000425000 | -3.699130000 |
| 1  | -0.100180000 | 0.889056000  | -4.300988000 |
| 1  | 1.149823000  | 0.000171000  | -3.389300000 |
| 1  | -0.099389000 | -0.890722000 | -4.300046000 |
| 6  | -4.780680000 | -3.573283000 | -1.614840000 |
| 1  | -5.415679000 | -4.016744000 | -0.843918000 |
| 1  | -5.402468000 | -3.309883000 | -2.474397000 |
| 1  | -4.039290000 | -4.312964000 | -1.927517000 |
| 6  | -4.785217000 | -0.000276000 | 3.958723000  |
| 1  | -5.416453000 | -0.888735000 | 4.036382000  |
| 1  | -4.068564000 | -0.002136000 | 4.783246000  |
| 1  | -5.413753000 | 0.889948000  | 4.038055000  |
| 44 | -2.507877000 | 0.000013000  | 0.035117000  |
| 31 | 3.001995000  | 0.000006000  | 0.258221000  |
| 17 | 3.436338000  | 0.000032000  | -1.933269000 |
| 17 | 3.984517000  | 1.715571000  | 1.196523000  |
| 17 | 3.984602000  | -1.715572000 | 1.196416000  |

**6a-GaCl<sub>3</sub>**, TE = -5935.294079

|   |              |              |              |
|---|--------------|--------------|--------------|
| 6 | -1.343456000 | 1.330888000  | -0.710792000 |
| 7 | 0.140817000  | 1.168069000  | -0.553702000 |
| 6 | 0.775533000  | -0.000038000 | -0.376963000 |
| 7 | 0.140882000  | -1.168230000 | -0.553493000 |
| 6 | -1.343371000 | -1.331177000 | -0.710401000 |
| 8 | -1.672774000 | 2.327366000  | -1.301938000 |
| 6 | 0.919502000  | 2.356580000  | -0.754143000 |
| 6 | 0.661353000  | 3.494320000  | 0.005235000  |
| 6 | 1.402488000  | 4.642927000  | -0.208012000 |



|    |              |              |              |
|----|--------------|--------------|--------------|
| 6  | 2.406290000  | 4.662202000  | -1.173909000 |
| 6  | 2.654616000  | 3.529642000  | -1.934219000 |
| 6  | 1.898148000  | 2.378789000  | -1.737911000 |
| 1  | -0.103624000 | 3.464919000  | 0.772085000  |
| 1  | 1.211089000  | 5.524979000  | 0.394105000  |
| 1  | 2.994791000  | 5.560685000  | -1.327855000 |
| 1  | 3.436442000  | 3.532251000  | -2.685843000 |
| 1  | 2.076260000  | 1.497494000  | -2.343281000 |
| 6  | 0.919687000  | -2.356656000 | -0.753975000 |
| 6  | 0.661740000  | -3.494431000 | 0.005418000  |
| 6  | 1.403036000  | -4.642928000 | -0.207863000 |
| 6  | 2.406800000  | -4.662060000 | -1.173803000 |
| 6  | 2.654922000  | -3.529469000 | -1.934132000 |
| 6  | 1.898291000  | -2.378729000 | -1.737792000 |
| 1  | -0.103199000 | -3.465147000 | 0.772307000  |
| 1  | 1.211793000  | -5.525006000 | 0.394265000  |
| 1  | 2.995427000  | -5.560457000 | -1.327770000 |
| 1  | 3.436716000  | -3.531963000 | -2.685791000 |
| 1  | 2.076244000  | -1.497411000 | -2.343177000 |
| 8  | -1.672702000 | -2.327853000 | -1.301212000 |
| 26 | -2.497636000 | -0.000048000 | 0.119219000  |
| 6  | -3.538108000 | -1.401527000 | 0.794797000  |
| 6  | -3.438435000 | -0.000351000 | -1.481255000 |
| 6  | -3.538254000 | 1.401560000  | 0.794297000  |
| 6  | -1.435971000 | 0.000291000  | 1.660987000  |
| 7  | -4.144142000 | 2.323477000  | 1.170922000  |
| 7  | -4.143910000 | -2.323367000 | 1.171747000  |
| 7  | -3.984390000 | -0.000568000 | -2.507955000 |
| 7  | -0.767690000 | 0.000542000  | 2.612671000  |
| 6  | 0.131143000  | 0.000757000  | 3.707456000  |
| 1  | 0.773668000  | -0.879870000 | 3.643612000  |
| 1  | 0.767075000  | 0.886465000  | 3.648749000  |
| 1  | -0.431560000 | -0.004029000 | 4.643184000  |
| 6  | -4.808516000 | 3.511887000  | 1.539634000  |
| 1  | -4.478643000 | 3.830366000  | 2.530868000  |
| 1  | -4.578918000 | 4.297729000  | 0.816554000  |
| 1  | -5.887864000 | 3.346240000  | 1.560757000  |
| 6  | -4.524590000 | -0.000887000 | -3.810322000 |
| 1  | -4.188402000 | -0.891782000 | -4.345122000 |
| 1  | -5.615602000 | -0.000422000 | -3.763468000 |
| 1  | -4.187680000 | 0.889295000  | -4.345853000 |
| 6  | -4.808250000 | -3.511688000 | 1.540805000  |
| 1  | -5.887300000 | -3.344777000 | 1.566650000  |
| 1  | -4.582530000 | -4.296392000 | 0.815272000  |
| 1  | -4.474729000 | -3.832524000 | 2.530057000  |
| 31 | 2.682435000  | 0.000099000  | 0.477115000  |

|    |             |              |              |
|----|-------------|--------------|--------------|
| 17 | 2.815636000 | 1.723062000  | 1.853233000  |
| 17 | 4.327804000 | 0.000212000  | -0.966536000 |
| 17 | 2.815904000 | -1.723123000 | 1.852978000  |

**6b-GaCl<sub>3</sub>, TE = - 9082.783511**

|   |              |              |              |
|---|--------------|--------------|--------------|
| 6 | -1.169678000 | -1.384206000 | 0.746976000  |
| 7 | 0.311332000  | -1.175580000 | 0.581096000  |
| 6 | 0.930582000  | 0.000129000  | 0.388368000  |
| 7 | 0.311928000  | 1.176300000  | 0.580515000  |
| 6 | -1.169020000 | 1.385509000  | 0.746211000  |
| 8 | -1.467399000 | -2.388499000 | 1.340457000  |
| 6 | 1.117956000  | -2.345256000 | 0.788053000  |
| 6 | 0.882838000  | -3.497674000 | 0.043156000  |
| 6 | 1.647925000  | -4.627671000 | 0.269873000  |
| 6 | 2.652826000  | -4.614468000 | 1.234754000  |
| 6 | 2.879060000  | -3.467598000 | 1.980052000  |
| 6 | 2.098944000  | -2.335153000 | 1.769752000  |
| 1 | 0.116519000  | -3.494324000 | -0.722598000 |
| 1 | 1.473995000  | -5.520847000 | -0.320967000 |
| 1 | 3.259634000  | -5.498805000 | 1.399221000  |
| 1 | 3.661871000  | -3.444500000 | 2.730246000  |
| 1 | 2.259202000  | -1.442964000 | 2.363995000  |
| 6 | 1.119359000  | 2.345323000  | 0.787719000  |
| 6 | 0.884119000  | 3.498568000  | 0.044152000  |
| 6 | 1.650756000  | 4.627602000  | 0.270489000  |
| 6 | 2.657384000  | 4.612582000  | 1.233517000  |
| 6 | 2.883698000  | 3.464890000  | 1.977549000  |
| 6 | 2.101995000  | 2.333460000  | 1.767791000  |
| 1 | 0.116696000  | 3.496591000  | -0.720509000 |
| 1 | 1.476736000  | 5.521415000  | -0.319363000 |
| 1 | 3.265444000  | 5.496132000  | 1.397571000  |
| 1 | 3.667802000  | 3.440376000  | 2.726350000  |
| 1 | 2.262420000  | 1.440659000  | 2.361099000  |
| 8 | -1.466432000 | 2.390157000  | 1.339268000  |
| 6 | -3.550374000 | 1.501509000  | -0.814608000 |
| 6 | -3.384972000 | 0.001206000  | 1.612571000  |
| 6 | -3.551482000 | -1.499403000 | -0.814354000 |
| 6 | -1.307642000 | -0.000534000 | -1.759877000 |
| 7 | -4.146757000 | -2.436743000 | -1.170542000 |
| 7 | -4.144689000 | 2.439573000  | -1.170503000 |
| 7 | -3.898149000 | 0.001373000  | 2.656231000  |
| 7 | -0.626565000 | -0.001879000 | -2.701703000 |
| 6 | 0.275733000  | -0.002262000 | -3.793277000 |
| 1 | 0.969772000  | 0.833681000  | -3.681848000 |
| 1 | 0.855878000  | -0.926704000 | -3.776813000 |
| 1 | -0.282239000 | 0.083544000  | -4.727889000 |

|    |              |              |              |
|----|--------------|--------------|--------------|
| 6  | -4.799382000 | -3.632919000 | -1.534664000 |
| 1  | -4.552787000 | -3.891203000 | -2.566803000 |
| 1  | -4.474697000 | -4.441556000 | -0.876019000 |
| 1  | -5.881157000 | -3.510264000 | -1.447272000 |
| 6  | -4.418787000 | 0.001439000  | 3.966589000  |
| 1  | -4.074255000 | 0.891972000  | 4.496553000  |
| 1  | -5.510333000 | 0.001477000  | 3.934823000  |
| 1  | -4.074316000 | -0.889089000 | 4.496600000  |
| 6  | -4.795712000 | 3.636869000  | -1.533823000 |
| 1  | -5.877676000 | 3.515439000  | -1.447065000 |
| 1  | -4.470350000 | 4.444479000  | -0.874253000 |
| 1  | -4.548309000 | 3.895844000  | -2.565595000 |
| 44 | -2.426482000 | 0.000700000  | -0.112736000 |
| 31 | 2.805895000  | -0.001510000 | -0.516536000 |
| 17 | 4.505267000  | -0.007530000 | 0.853795000  |
| 17 | 2.891733000  | -1.714979000 | -1.902948000 |
| 17 | 2.905753000  | 1.720652000  | -1.892713000 |

Cartesian coordinates for the optimized geometries of protonated complex **1a-6b**, along with their total energies (in hartrees) including zero point vibrational correction in gas phase.

**[1a-H]<sup>+</sup>**, TE = -1869.856379

|    |              |              |              |
|----|--------------|--------------|--------------|
| 6  | -2.133774000 | 0.901086000  | -0.000211000 |
| 6  | -1.166596000 | -1.171495000 | 0.000351000  |
| 1  | -1.339120000 | -2.250916000 | 0.000575000  |
| 7  | -2.298009000 | -0.485620000 | 0.000166000  |
| 7  | -0.939171000 | 1.335599000  | -0.000379000 |
| 6  | -3.653687000 | -1.047209000 | 0.000248000  |
| 1  | -4.190972000 | -0.723262000 | -0.892873000 |
| 1  | -3.578608000 | -2.132956000 | 0.000777000  |
| 1  | -4.191204000 | -0.722420000 | 0.892921000  |
| 6  | -0.702484000 | 2.769454000  | -0.000747000 |
| 1  | -0.116983000 | 3.035052000  | 0.882634000  |
| 1  | -0.117107000 | 3.034617000  | -0.884342000 |
| 1  | -1.634983000 | 3.339490000  | -0.000820000 |
| 25 | 0.481176000  | -0.145533000 | 0.000040000  |
| 6  | 0.503328000  | -0.161670000 | 1.865793000  |
| 8  | 0.516033000  | -0.188109000 | 2.997464000  |
| 6  | 1.513810000  | -1.655768000 | 0.000588000  |
| 8  | 2.114416000  | -2.618366000 | 0.000958000  |
| 6  | 1.951386000  | 1.012073000  | -0.000441000 |
| 8  | 2.845442000  | 1.707531000  | -0.000752000 |
| 6  | 0.503253000  | -0.163086000 | -1.865692000 |
| 8  | 0.515945000  | -0.190420000 | -2.997343000 |
| 1  | -3.026267000 | 1.523459000  | -0.000335000 |

[1b-H]<sup>+</sup>, TE = -2003.658090

|    |              |              |              |
|----|--------------|--------------|--------------|
| 6  | -0.576209000 | 2.254972000  | -0.101899000 |
| 6  | -1.270429000 | 0.042590000  | 0.098112000  |
| 7  | -1.626384000 | 1.377573000  | 0.032369000  |
| 7  | 0.617556000  | 1.819610000  | -0.150723000 |
| 25 | 0.769240000  | -0.208421000 | 0.012823000  |
| 6  | 0.860245000  | -0.059476000 | 1.866165000  |
| 8  | 0.885461000  | 0.022443000  | 2.996899000  |
| 6  | 0.906914000  | -2.020511000 | 0.135385000  |
| 8  | 1.073273000  | -3.145947000 | 0.191035000  |
| 6  | 2.604311000  | -0.141403000 | -0.164279000 |
| 8  | 3.733870000  | -0.107065000 | -0.273110000 |
| 6  | 0.528202000  | -0.372934000 | -1.823024000 |
| 8  | 0.353064000  | -0.490727000 | -2.937591000 |
| 6  | 1.708395000  | 2.768329000  | -0.297035000 |
| 6  | -2.911284000 | 1.957709000  | 0.455700000  |
| 7  | -2.254893000 | -0.841213000 | 0.057405000  |
| 6  | -3.555856000 | -0.636649000 | -0.589280000 |
| 1  | -4.367250000 | -0.531265000 | 0.134884000  |
| 1  | -3.527910000 | 0.222791000  | -1.253857000 |
| 1  | -3.754771000 | -1.521616000 | -1.198171000 |
| 6  | -2.049615000 | -2.227600000 | 0.465347000  |
| 1  | -2.985013000 | -2.594273000 | 0.893144000  |
| 1  | -1.787579000 | -2.859003000 | -0.388793000 |
| 1  | -1.284100000 | -2.288200000 | 1.232529000  |
| 1  | -3.398577000 | 1.282309000  | 1.156500000  |
| 1  | -2.710820000 | 2.890822000  | 0.982776000  |
| 1  | -3.577122000 | 2.163579000  | -0.383237000 |
| 1  | 1.345259000  | 3.799372000  | -0.329607000 |
| 1  | 2.399861000  | 2.662754000  | 0.542348000  |
| 1  | 2.258368000  | 2.558732000  | -1.217551000 |
| 1  | -0.828699000 | 3.312929000  | -0.153907000 |

**[1c-H]<sup>+</sup>**, TE = -1984.284153

|    |              |              |              |
|----|--------------|--------------|--------------|
| 6  | 1.181236000  | -2.049837000 | -0.000091000 |
| 6  | 1.408839000  | 0.247470000  | 0.000090000  |
| 7  | 2.026134000  | -0.963587000 | 0.000071000  |
| 7  | -0.074917000 | -1.847498000 | -0.000180000 |
| 25 | -0.596018000 | 0.135239000  | -0.000002000 |
| 6  | -0.563444000 | 0.148936000  | 1.863529000  |
| 8  | -0.533300000 | 0.170199000  | 2.995762000  |
| 6  | -1.009742000 | 1.912191000  | 0.000218000  |
| 8  | -1.329957000 | 3.003910000  | 0.000360000  |
| 6  | -2.408134000 | -0.261479000 | -0.000172000 |
| 8  | -3.517498000 | -0.494743000 | -0.000282000 |
| 6  | -0.563231000 | 0.149416000  | -1.863523000 |
| 8  | -0.532960000 | 0.170980000  | -2.995747000 |
| 6  | -0.976366000 | -2.987639000 | -0.000318000 |
| 8  | 2.302834000  | 1.186927000  | 0.000095000  |
| 6  | 1.943303000  | 2.578543000  | 0.000173000  |
| 1  | 1.378652000  | 2.817802000  | -0.900462000 |
| 1  | 1.378670000  | 2.817708000  | 0.900844000  |
| 1  | 2.889377000  | 3.114773000  | 0.000190000  |
| 6  | 3.482574000  | -1.130367000 | 0.000053000  |
| 1  | 3.911622000  | -0.667795000 | -0.888953000 |
| 1  | 3.911716000  | -0.666736000 | 0.888451000  |
| 1  | 3.712110000  | -2.194869000 | 0.000690000  |
| 1  | -0.430405000 | -3.934834000 | -0.000363000 |
| 1  | -1.616576000 | -2.947334000 | 0.884137000  |
| 1  | -1.616480000 | -2.947194000 | -0.884837000 |
| 1  | 1.640072000  | -3.036480000 | -0.000129000 |

**[1'a-H]<sup>+</sup>**, TE = -2252.868116

|   |              |              |             |
|---|--------------|--------------|-------------|
| 6 | 0.635507000  | 1.083356000  | 0.050584000 |
| 6 | 1.173904000  | -1.146952000 | 0.024030000 |
| 1 | 1.990883000  | -1.872355000 | 0.046490000 |
| 7 | 1.626455000  | 0.101565000  | 0.043065000 |
| 7 | -0.575056000 | 0.677529000  | 0.071872000 |

|    |              |              |              |
|----|--------------|--------------|--------------|
| 25 | -0.749171000 | -1.383104000 | 0.002079000  |
| 6  | -0.754249000 | -1.293064000 | -1.861115000 |
| 8  | -0.741415000 | -1.246981000 | -2.992560000 |
| 6  | -0.587626000 | -3.197213000 | -0.099766000 |
| 8  | -0.436768000 | -4.320892000 | -0.163651000 |
| 6  | -2.622881000 | -1.435938000 | -0.013562000 |
| 8  | -3.752945000 | -1.504708000 | -0.032709000 |
| 6  | -0.752464000 | -1.505625000 | 1.861925000  |
| 8  | -0.743097000 | -1.593338000 | 2.991278000  |
| 6  | -1.613121000 | 1.652785000  | 0.001865000  |
| 6  | -2.635627000 | 1.628451000  | 0.947551000  |
| 6  | -1.602106000 | 2.614334000  | -1.007559000 |
| 6  | -3.634674000 | 2.589653000  | 0.894755000  |
| 1  | -2.632480000 | 0.883694000  | 1.736078000  |
| 6  | -2.615597000 | 3.563000000  | -1.058644000 |
| 1  | -0.826135000 | 2.598868000  | -1.766734000 |
| 6  | -3.628579000 | 3.554968000  | -0.107613000 |
| 1  | -4.422102000 | 2.583732000  | 1.640223000  |
| 1  | -2.615679000 | 4.303930000  | -1.850412000 |
| 1  | -4.419162000 | 4.295733000  | -0.150906000 |
| 6  | 3.018320000  | 0.483035000  | 0.059706000  |
| 6  | 3.480901000  | 1.327573000  | 1.061726000  |
| 6  | 3.863606000  | -0.010649000 | -0.925804000 |
| 6  | 4.824272000  | 1.680833000  | 1.072719000  |
| 1  | 2.811722000  | 1.686129000  | 1.837707000  |
| 6  | 5.206369000  | 0.343879000  | -0.897242000 |
| 1  | 3.476362000  | -0.647691000 | -1.714552000 |
| 6  | 5.685063000  | 1.188869000  | 0.097553000  |
| 1  | 5.199420000  | 2.333275000  | 1.853166000  |
| 1  | 5.875723000  | -0.032795000 | -1.662464000 |
| 1  | 6.733082000  | 1.466590000  | 0.112552000  |
| 1  | 0.945535000  | 2.124412000  | 0.036815000  |

[1'b-H]<sup>+</sup>, TE = -2386.671707

|    |              |              |              |
|----|--------------|--------------|--------------|
| 6  | 0.274674000  | -1.263642000 | -0.286630000 |
| 6  | 1.098893000  | 0.919249000  | -0.140528000 |
| 7  | 1.372864000  | -0.436290000 | -0.290819000 |
| 7  | -0.896404000 | -0.769041000 | -0.177607000 |
| 25 | -0.917062000 | 1.260060000  | 0.116988000  |
| 6  | -0.701361000 | 0.978125000  | 1.941730000  |
| 8  | -0.533378000 | 0.814409000  | 3.051907000  |
| 6  | -0.950865000 | 3.056831000  | 0.381866000  |
| 8  | -1.059840000 | 4.180232000  | 0.542019000  |
| 6  | -2.760049000 | 1.283138000  | 0.270753000  |
| 8  | -3.887732000 | 1.334206000  | 0.382377000  |
| 6  | -0.976367000 | 1.549147000  | -1.717263000 |
| 8  | -0.982666000 | 1.745812000  | -2.835108000 |
| 6  | -2.003827000 | -1.670852000 | -0.136121000 |
| 6  | -2.997716000 | -1.577166000 | -1.106600000 |
| 6  | -2.089685000 | -2.626393000 | 0.873502000  |
| 6  | -4.071002000 | -2.456600000 | -1.073207000 |
| 1  | -2.922161000 | -0.833625000 | -1.893113000 |
| 6  | -3.171983000 | -3.498632000 | 0.901453000  |
| 1  | -1.325906000 | -2.672219000 | 1.643825000  |
| 6  | -4.161309000 | -3.416455000 | -0.070259000 |
| 1  | -4.839675000 | -2.391776000 | -1.835434000 |
| 1  | -3.242207000 | -4.238800000 | 1.691029000  |
| 1  | -5.005812000 | -4.096018000 | -0.043959000 |
| 6  | 2.650174000  | -1.095125000 | -0.111220000 |
| 6  | 3.135501000  | -1.942394000 | -1.100590000 |
| 6  | 3.335970000  | -0.924632000 | 1.085862000  |
| 6  | 4.331862000  | -2.617926000 | -0.890340000 |
| 1  | 2.589835000  | -2.065170000 | -2.031315000 |
| 6  | 4.539021000  | -1.593278000 | 1.279923000  |
| 1  | 2.931754000  | -0.281704000 | 1.861229000  |
| 6  | 5.036937000  | -2.438745000 | 0.294672000  |
| 1  | 4.714798000  | -3.280956000 | -1.658264000 |
| 1  | 5.079514000  | -1.463647000 | 2.211172000  |

|   |             |              |              |
|---|-------------|--------------|--------------|
| 1 | 5.972012000 | -2.964335000 | 0.453418000  |
| 7 | 2.101199000 | 1.758735000  | -0.322975000 |
| 6 | 3.338347000 | 1.484108000  | -1.063156000 |
| 1 | 4.174185000 | 1.277846000  | -0.390575000 |
| 1 | 3.208131000 | 0.650622000  | -1.747057000 |
| 1 | 3.564728000 | 2.378256000  | -1.647644000 |
| 6 | 2.009110000 | 3.153417000  | 0.100423000  |
| 1 | 3.012419000 | 3.489935000  | 0.367995000  |
| 1 | 1.634060000 | 3.789050000  | -0.707046000 |
| 1 | 1.379423000 | 3.247029000  | 0.979379000  |
| 1 | 0.468816000 | -2.330138000 | -0.373706000 |

[1'e-H]<sup>+</sup>, TE = -2367.293052

|    |              |              |              |
|----|--------------|--------------|--------------|
| 6  | 0.403227000  | -1.272704000 | -0.043064000 |
| 6  | 1.159534000  | 0.918643000  | 0.008649000  |
| 7  | 1.474729000  | -0.410067000 | -0.009541000 |
| 7  | -0.776659000 | -0.784243000 | -0.065618000 |
| 25 | -0.815580000 | 1.274985000  | 0.041062000  |
| 6  | -0.767007000 | 1.147262000  | 1.898945000  |
| 8  | -0.721248000 | 1.077228000  | 3.029111000  |
| 6  | -0.796433000 | 3.090096000  | 0.171199000  |
| 8  | -0.850788000 | 4.224192000  | 0.256153000  |
| 6  | -2.674756000 | 1.326533000  | 0.074632000  |
| 8  | -3.804883000 | 1.396402000  | 0.107598000  |
| 6  | -0.791509000 | 1.406778000  | -1.814605000 |
| 8  | -0.760398000 | 1.501635000  | -2.944121000 |
| 6  | -1.880932000 | -1.689891000 | -0.052226000 |
| 6  | -2.818894000 | -1.636505000 | -1.079985000 |
| 6  | -2.016683000 | -2.612331000 | 0.982599000  |
| 6  | -3.885150000 | -2.524624000 | -1.078346000 |
| 1  | -2.702564000 | -0.922860000 | -1.888769000 |
| 6  | -3.092549000 | -3.492710000 | 0.978229000  |
| 1  | -1.299245000 | -2.625005000 | 1.797438000  |
| 6  | -4.025323000 | -3.451529000 | -0.050292000 |
| 1  | -4.608603000 | -2.493333000 | -1.885563000 |



|   |              |              |              |
|---|--------------|--------------|--------------|
| 1 | -3.202421000 | -4.206825000 | 1.786970000  |
| 1 | -4.864827000 | -4.137726000 | -0.049391000 |
| 6 | 2.821451000  | -0.940474000 | -0.049163000 |
| 6 | 3.381683000  | -1.267526000 | -1.276730000 |
| 6 | 3.509882000  | -1.134465000 | 1.140737000  |
| 6 | 4.662546000  | -1.805428000 | -1.309470000 |
| 1 | 2.825475000  | -1.102918000 | -2.193945000 |
| 6 | 4.790657000  | -1.670938000 | 1.095599000  |
| 1 | 3.051180000  | -0.871085000 | 2.088124000  |
| 6 | 5.364377000  | -2.005928000 | -0.126135000 |
| 1 | 5.110724000  | -2.067801000 | -2.261297000 |
| 1 | 5.339071000  | -1.829980000 | 2.017374000  |
| 1 | 6.363599000  | -2.426397000 | -0.155857000 |
| 8 | 2.241335000  | 1.626785000  | -0.006401000 |
| 6 | 2.212249000  | 3.062089000  | -0.005925000 |
| 1 | 1.664075000  | 3.427024000  | -0.874220000 |
| 1 | 1.774251000  | 3.426808000  | 0.922864000  |
| 1 | 3.255004000  | 3.364245000  | -0.069633000 |
| 1 | 0.626926000  | -2.336620000 | -0.061141000 |

**[2a-H]<sup>+</sup>**, TE = - 1908.552354

|   |              |              |              |
|---|--------------|--------------|--------------|
| 6 | -2.597699000 | -0.931457000 | 0.002254000  |
| 6 | -1.569227000 | 1.108268000  | -0.000695000 |
| 1 | -1.725240000 | 2.191670000  | -0.002040000 |
| 7 | -2.731065000 | 0.450124000  | 0.000762000  |
| 7 | -1.408572000 | -1.388958000 | 0.002020000  |
| 6 | -4.066618000 | 1.047470000  | 0.000525000  |
| 1 | -4.617756000 | 0.744444000  | 0.893099000  |
| 1 | -3.960187000 | 2.130814000  | -0.000560000 |
| 1 | -4.618220000 | 0.742686000  | -0.891164000 |
| 6 | -1.208403000 | -2.824653000 | 0.003212000  |
| 1 | -0.630814000 | -3.105378000 | -0.880684000 |
| 1 | -0.627040000 | -3.103700000 | 0.885089000  |
| 1 | -2.153915000 | -3.374909000 | 0.005648000  |
| 6 | 0.132297000  | 0.099991000  | -1.847576000 |

|    |              |              |              |
|----|--------------|--------------|--------------|
| 8  | 0.221478000  | 0.156118000  | -2.980691000 |
| 6  | 0.133809000  | 0.103646000  | 1.846758000  |
| 8  | 0.223659000  | 0.161866000  | 2.979733000  |
| 6  | 1.513737000  | -1.170595000 | 0.000220000  |
| 7  | 2.418376000  | -1.903594000 | 0.000721000  |
| 6  | 1.122674000  | 1.595273000  | -0.002141000 |
| 7  | 1.762799000  | 2.569227000  | -0.003119000 |
| 6  | 2.565777000  | 3.734293000  | -0.003387000 |
| 1  | 2.369095000  | 4.316625000  | -0.905481000 |
| 1  | 2.335123000  | 4.340551000  | 0.874577000  |
| 1  | 3.620656000  | 3.454130000  | 0.020586000  |
| 6  | 3.539495000  | -2.767491000 | -0.000077000 |
| 1  | 4.374717000  | -2.282198000 | -0.508407000 |
| 1  | 3.825704000  | -2.996231000 | 1.028077000  |
| 1  | 3.290796000  | -3.694032000 | -0.520764000 |
| 25 | 0.032357000  | 0.063086000  | -0.000310000 |
| 1  | -3.501431000 | -1.537555000 | 0.003549000  |

**[2b-H]<sup>+</sup>**, TE = - 2042.344581

|   |              |              |              |
|---|--------------|--------------|--------------|
| 6 | -1.411252000 | -2.286100000 | -0.005474000 |
| 6 | -1.635639000 | 0.028808000  | 0.067233000  |
| 7 | -2.263191000 | -1.208750000 | 0.053861000  |
| 7 | -0.155072000 | -2.094175000 | -0.045149000 |
| 6 | 0.265363000  | 0.060036000  | -1.789195000 |
| 8 | 0.181292000  | 0.230940000  | -2.914296000 |
| 6 | 0.465557000  | -0.166019000 | 1.883138000  |
| 8 | 0.502358000  | -0.145032000 | 3.022720000  |
| 6 | 2.228456000  | -0.588261000 | -0.103560000 |
| 7 | 3.361332000  | -0.850553000 | -0.193601000 |
| 6 | 0.926353000  | 1.665923000  | 0.105457000  |
| 7 | 1.361796000  | 2.750539000  | 0.131766000  |
| 6 | 1.911158000  | 4.052503000  | 0.165406000  |
| 1 | 1.122892000  | 4.788235000  | 0.340824000  |
| 1 | 2.647192000  | 4.123086000  | 0.969018000  |
| 1 | 2.398431000  | 4.273623000  | -0.786512000 |

|    |              |              |              |
|----|--------------|--------------|--------------|
| 6  | 4.737688000  | -1.157226000 | -0.302347000 |
| 1  | 5.116050000  | -0.818817000 | -1.268916000 |
| 1  | 5.290636000  | -0.658595000 | 0.496113000  |
| 1  | 4.884423000  | -2.235952000 | -0.218144000 |
| 25 | 0.388097000  | -0.129669000 | 0.038332000  |
| 6  | 0.721369000  | -3.246136000 | -0.114766000 |
| 6  | -3.639674000 | -1.484691000 | 0.484973000  |
| 7  | -2.446064000 | 1.079285000  | -0.049460000 |
| 6  | -1.994637000 | 2.417527000  | 0.299037000  |
| 1  | -1.219051000 | 2.364041000  | 1.056287000  |
| 1  | -1.623353000 | 2.953056000  | -0.581118000 |
| 1  | -2.845273000 | 2.967964000  | 0.708993000  |
| 6  | -3.722441000 | 1.085868000  | -0.766765000 |
| 1  | -3.817209000 | 0.202758000  | -1.394188000 |
| 1  | -4.581658000 | 1.163522000  | -0.095042000 |
| 1  | -3.724150000 | 1.959450000  | -1.423577000 |
| 1  | -3.644744000 | -2.411387000 | 1.059832000  |
| 1  | -3.976858000 | -0.686103000 | 1.144196000  |
| 1  | -4.334713000 | -1.587275000 | -0.349916000 |
| 1  | 1.407411000  | -3.231664000 | 0.735504000  |
| 1  | 0.161584000  | -4.186680000 | -0.104805000 |
| 1  | 1.317303000  | -3.199094000 | -1.029410000 |
| 1  | -1.871060000 | -3.273469000 | -0.009629000 |

**[2c-H]<sup>+</sup>**, TE = - 2022.975482

|   |              |              |              |
|---|--------------|--------------|--------------|
| 6 | 1.980024000  | -1.918921000 | 0.000484000  |
| 6 | 1.741250000  | 0.376021000  | 0.000319000  |
| 7 | 2.594325000  | -0.690242000 | 0.001014000  |
| 7 | 0.707907000  | -1.958599000 | -0.000315000 |
| 6 | -0.208501000 | -0.043332000 | 1.845416000  |
| 8 | -0.240365000 | 0.040105000  | 2.981181000  |
| 6 | -0.207644000 | -0.043036000 | -1.846194000 |
| 8 | -0.238975000 | 0.040567000  | -2.981945000 |
| 6 | -1.926335000 | -0.885515000 | -0.000584000 |
| 7 | -2.999392000 | -1.338978000 | -0.000207000 |

|    |              |              |              |
|----|--------------|--------------|--------------|
| 6  | -0.982296000 | 1.588475000  | -0.000291000 |
| 7  | -1.566277000 | 2.599939000  | -0.000082000 |
| 6  | -2.294965000 | 3.812212000  | 0.000482000  |
| 1  | -1.608625000 | 4.661778000  | -0.014023000 |
| 1  | -2.936292000 | 3.857579000  | -0.882001000 |
| 1  | -2.914204000 | 3.869960000  | 0.897888000  |
| 6  | -4.308194000 | -1.876988000 | 0.000975000  |
| 1  | -4.767183000 | -1.724493000 | 0.979566000  |
| 1  | -4.909994000 | -1.380282000 | -0.762364000 |
| 1  | -4.267704000 | -2.946452000 | -0.214562000 |
| 25 | -0.178354000 | -0.110838000 | -0.000367000 |
| 6  | 0.050106000  | -3.249999000 | -0.001314000 |
| 6  | 4.051484000  | -0.568059000 | 0.001898000  |
| 8  | 2.455722000  | 1.471288000  | 0.000420000  |
| 6  | 1.827724000  | 2.755165000  | -0.000450000 |
| 1  | 1.220270000  | 2.874199000  | -0.897569000 |
| 1  | 1.220359000  | 2.875464000  | 0.896559000  |
| 1  | 2.645218000  | 3.473466000  | -0.000983000 |
| 1  | 4.486405000  | -1.566801000 | 0.002686000  |
| 1  | 4.385390000  | -0.030272000 | -0.885964000 |
| 1  | 4.384192000  | -0.029427000 | 0.889692000  |
| 1  | -0.585286000 | -3.333707000 | -0.886307000 |
| 1  | 0.768862000  | -4.075189000 | -0.000462000 |
| 1  | -0.587880000 | -3.334021000 | 0.881732000  |
| 1  | 2.622422000  | -2.797519000 | 0.000709000  |

**[2'a-H]<sup>+</sup>**, TE = - 2291.561750

|   |              |              |              |
|---|--------------|--------------|--------------|
| 6 | -0.992580000 | -1.299813000 | 0.096848000  |
| 6 | -1.307377000 | 0.969380000  | -0.003006000 |
| 1 | -2.062565000 | 1.759700000  | -0.049078000 |
| 7 | -1.886325000 | -0.241796000 | 0.043058000  |
| 7 | 0.250276000  | -0.996406000 | 0.099220000  |
| 6 | 0.621722000  | 0.992851000  | -1.873181000 |
| 8 | 0.638596000  | 1.008202000  | -3.010839000 |
| 6 | 0.693316000  | 1.255900000  | 1.810498000  |

|    |              |              |              |
|----|--------------|--------------|--------------|
| 8  | 0.753095000  | 1.440050000  | 2.932435000  |
| 6  | 2.516124000  | 0.848988000  | -0.073848000 |
| 7  | 3.671418000  | 0.724511000  | -0.124302000 |
| 6  | 0.605550000  | 2.907069000  | -0.154507000 |
| 7  | 0.568714000  | 4.069140000  | -0.237694000 |
| 6  | 0.556664000  | 5.479854000  | -0.342906000 |
| 1  | -0.071817000 | 5.781167000  | -1.183075000 |
| 1  | 0.160778000  | 5.914338000  | 0.576935000  |
| 1  | 1.572447000  | 5.845681000  | -0.505015000 |
| 6  | 5.068427000  | 0.515401000  | -0.188814000 |
| 1  | 5.435935000  | 0.801058000  | -1.176069000 |
| 1  | 5.566295000  | 1.120517000  | 0.570969000  |
| 1  | 5.284871000  | -0.540460000 | -0.013378000 |
| 25 | 0.596063000  | 1.034239000  | -0.023090000 |
| 6  | 1.193357000  | -2.063682000 | 0.121332000  |
| 6  | 2.123967000  | -2.135116000 | 1.155755000  |
| 6  | 1.189692000  | -3.022447000 | -0.889237000 |
| 6  | 3.031801000  | -3.184774000 | 1.187310000  |
| 1  | 2.114585000  | -1.388039000 | 1.941908000  |
| 6  | 2.112613000  | -4.061698000 | -0.856458000 |
| 1  | 0.483583000  | -2.939601000 | -1.709575000 |
| 6  | 3.031511000  | -4.147415000 | 0.181604000  |
| 1  | 3.737781000  | -3.256636000 | 2.008029000  |
| 1  | 2.111225000  | -4.804157000 | -1.647100000 |
| 1  | 3.746117000  | -4.962633000 | 0.209244000  |
| 6  | -3.304065000 | -0.487376000 | 0.054099000  |
| 6  | -3.862288000 | -1.318450000 | -0.910265000 |
| 6  | -4.090399000 | 0.117436000  | 1.026935000  |
| 6  | -5.232718000 | -1.546129000 | -0.895380000 |
| 1  | -3.238694000 | -1.765610000 | -1.677973000 |
| 6  | -5.460978000 | -0.108880000 | 1.025050000  |
| 1  | -3.632733000 | 0.743641000  | 1.785784000  |
| 6  | -6.031415000 | -0.940853000 | 0.068220000  |
| 1  | -5.677109000 | -2.189414000 | -1.646720000 |
| 1  | -6.081746000 | 0.357063000  | 1.782254000  |

|   |              |              |             |
|---|--------------|--------------|-------------|
| 1 | -7.101008000 | -1.118992000 | 0.074183000 |
| 1 | -1.389169000 | -2.309241000 | 0.160878000 |

**[2'b-H]<sup>+</sup>**, TE = - 2425.357137

|    |              |              |              |
|----|--------------|--------------|--------------|
| 6  | -0.800775000 | -1.417178000 | -0.156980000 |
| 6  | -1.207178000 | 0.884443000  | -0.105589000 |
| 7  | -1.729976000 | -0.405208000 | -0.221244000 |
| 7  | 0.435589000  | -1.133059000 | -0.021339000 |
| 6  | 0.825311000  | 0.975502000  | -1.807968000 |
| 8  | 0.817550000  | 1.088240000  | -2.943569000 |
| 6  | 0.767917000  | 0.952641000  | 1.872929000  |
| 8  | 0.719539000  | 1.050290000  | 3.009244000  |
| 6  | 2.691966000  | 0.529016000  | 0.023653000  |
| 7  | 3.834717000  | 0.304268000  | -0.001255000 |
| 6  | 1.232912000  | 2.707661000  | 0.023767000  |
| 7  | 1.593815000  | 3.819675000  | 0.005699000  |
| 6  | 2.067966000  | 5.150847000  | -0.015195000 |
| 1  | 1.235705000  | 5.848229000  | 0.104968000  |
| 1  | 2.779142000  | 5.303756000  | 0.799351000  |
| 1  | 2.565468000  | 5.351745000  | -0.966363000 |
| 6  | 5.197844000  | -0.067374000 | -0.030324000 |
| 1  | 5.620984000  | 0.156890000  | -1.011385000 |
| 1  | 5.748882000  | 0.484225000  | 0.733786000  |
| 1  | 5.284276000  | -1.138968000 | 0.163422000  |
| 25 | 0.822734000  | 0.880223000  | 0.031039000  |
| 6  | 1.360762000  | -2.215898000 | 0.003462000  |
| 6  | 2.131333000  | -2.436614000 | 1.143151000  |
| 6  | 1.503001000  | -3.041751000 | -1.108491000 |
| 6  | 3.025610000  | -3.498315000 | 1.171705000  |
| 1  | 2.013050000  | -1.790035000 | 2.006063000  |
| 6  | 2.407820000  | -4.097714000 | -1.074583000 |
| 1  | 0.920299000  | -2.844580000 | -2.002963000 |
| 6  | 3.168414000  | -4.329930000 | 0.064139000  |
| 1  | 3.606753000  | -3.683766000 | 2.069101000  |
| 1  | 2.515699000  | -4.738494000 | -1.943175000 |

|   |              |              |              |
|---|--------------|--------------|--------------|
| 1 | 3.868742000  | -5.157570000 | 0.091710000  |
| 6 | -3.098294000 | -0.820437000 | -0.004436000 |
| 6 | -3.749573000 | -1.574981000 | -0.973557000 |
| 6 | -3.719504000 | -0.523678000 | 1.203591000  |
| 6 | -5.042719000 | -2.024396000 | -0.735204000 |
| 1 | -3.251860000 | -1.799033000 | -1.912158000 |
| 6 | -5.018103000 | -0.965660000 | 1.427816000  |
| 1 | -3.189280000 | 0.043257000  | 1.962007000  |
| 6 | -5.680189000 | -1.714536000 | 0.461140000  |
| 1 | -5.553837000 | -2.613232000 | -1.489001000 |
| 1 | -5.507198000 | -0.735748000 | 2.368207000  |
| 1 | -6.690860000 | -2.062931000 | 0.643182000  |
| 7 | -2.069933000 | 1.880857000  | -0.260456000 |
| 6 | -1.728928000 | 3.232654000  | 0.157961000  |
| 1 | -0.964659000 | 3.206857000  | 0.927642000  |
| 1 | -1.385483000 | 3.832816000  | -0.690726000 |
| 1 | -2.628314000 | 3.696233000  | 0.571537000  |
| 6 | -3.351737000 | 1.827753000  | -0.967173000 |
| 1 | -3.384653000 | 0.986914000  | -1.654241000 |
| 1 | -4.197963000 | 1.766703000  | -0.278084000 |
| 1 | -3.436789000 | 2.748430000  | -1.549307000 |
| 1 | -1.185776000 | -2.433585000 | -0.197664000 |

**[2'**c**-H]<sup>+</sup>, TE = - 2405.983150**

|   |              |              |              |
|---|--------------|--------------|--------------|
| 6 | -0.885261000 | -1.432764000 | 0.033181000  |
| 6 | -1.276453000 | 0.852849000  | 0.050844000  |
| 7 | -1.806228000 | -0.415616000 | 0.020665000  |
| 7 | 0.354400000  | -1.126293000 | 0.076768000  |
| 6 | 0.657572000  | 0.910319000  | -1.828751000 |
| 8 | 0.630753000  | 0.954309000  | -2.967149000 |
| 6 | 0.758438000  | 1.067717000  | 1.854914000  |
| 8 | 0.795553000  | 1.213292000  | 2.985043000  |
| 6 | 2.587048000  | 0.612515000  | -0.045588000 |
| 7 | 3.732802000  | 0.418433000  | -0.103126000 |

|    |              |              |              |
|----|--------------|--------------|--------------|
| 6  | 1.008016000  | 2.758877000  | -0.077673000 |
| 7  | 1.296324000  | 3.888846000  | -0.144432000 |
| 6  | 1.681948000  | 5.246925000  | -0.226772000 |
| 1  | 0.800691000  | 5.890538000  | -0.180245000 |
| 1  | 2.346704000  | 5.492773000  | 0.603816000  |
| 1  | 2.203991000  | 5.425472000  | -1.169012000 |
| 6  | 5.106297000  | 0.089755000  | -0.170569000 |
| 1  | 5.488108000  | 0.308799000  | -1.169393000 |
| 1  | 5.662444000  | 0.673726000  | 0.564994000  |
| 1  | 5.231819000  | -0.974718000 | 0.039450000  |
| 25 | 0.697650000  | 0.910852000  | 0.017178000  |
| 6  | 1.302260000  | -2.189327000 | 0.052385000  |
| 6  | 2.164154000  | -2.365084000 | 1.132840000  |
| 6  | 1.373079000  | -3.039913000 | -1.047694000 |
| 6  | 3.080336000  | -3.408350000 | 1.116056000  |
| 1  | 2.097000000  | -1.700529000 | 1.987679000  |
| 6  | 2.300583000  | -4.076230000 | -1.060129000 |
| 1  | 0.716169000  | -2.878678000 | -1.896789000 |
| 6  | 3.153227000  | -4.264046000 | 0.020190000  |
| 1  | 3.733031000  | -3.560932000 | 1.969346000  |
| 1  | 2.353333000  | -4.737229000 | -1.918527000 |
| 1  | 3.870870000  | -5.077113000 | 0.011934000  |
| 6  | -3.217246000 | -0.724195000 | 0.020417000  |
| 6  | -3.902336000 | -0.769450000 | -1.186674000 |
| 6  | -3.856742000 | -0.989998000 | 1.224039000  |
| 6  | -5.254586000 | -1.088106000 | -1.185256000 |
| 1  | -3.382311000 | -0.556476000 | -2.114834000 |
| 6  | -5.209144000 | -1.309968000 | 1.215113000  |
| 1  | -3.302825000 | -0.943691000 | 2.156014000  |
| 6  | -5.906195000 | -1.358485000 | 0.013157000  |
| 1  | -5.798364000 | -1.128052000 | -2.122651000 |
| 1  | -5.717462000 | -1.521431000 | 2.149388000  |
| 1  | -6.961428000 | -1.609035000 | 0.010074000  |
| 8  | -2.256887000 | 1.710120000  | 0.090264000  |
| 6  | -2.002268000 | 3.114443000  | 0.149765000  |



|   |              |              |              |
|---|--------------|--------------|--------------|
| 1 | -1.382325000 | 3.348046000  | 1.015202000  |
| 1 | -1.521857000 | 3.445939000  | -0.770896000 |
| 1 | -2.982129000 | 3.577011000  | 0.250443000  |
| 1 | -1.269533000 | -2.449983000 | 0.017399000  |

**[3a-H]<sup>+</sup>**, TE = - 1947.229537

|    |              |              |              |
|----|--------------|--------------|--------------|
| 6  | 2.612268000  | -0.009153000 | -0.975517000 |
| 6  | 1.596729000  | -0.006245000 | 1.071244000  |
| 1  | 1.777760000  | -0.007580000 | 2.152351000  |
| 7  | 2.764648000  | -0.010321000 | 0.395733000  |
| 7  | 1.412001000  | -0.004618000 | -1.413003000 |
| 6  | 4.101593000  | -0.015912000 | 0.980152000  |
| 1  | 4.660347000  | 0.872505000  | 0.676188000  |
| 1  | 4.003132000  | -0.014952000 | 2.064593000  |
| 1  | 4.652576000  | -0.909454000 | 0.677017000  |
| 6  | 1.190923000  | -0.002998000 | -2.842518000 |
| 1  | 0.602214000  | -0.882223000 | -3.116511000 |
| 1  | 0.608624000  | 0.880795000  | -3.115500000 |
| 1  | 2.126843000  | -0.006062000 | -3.411407000 |
| 25 | -0.000183000 | 0.000043000  | 0.061832000  |
| 6  | -1.502034000 | 0.005293000  | -1.133599000 |
| 7  | -2.422120000 | 0.008335000  | -1.855191000 |
| 6  | -1.029502000 | 0.003914000  | 1.609154000  |
| 7  | -1.627589000 | 0.006288000  | 2.616602000  |
| 6  | -0.099985000 | 1.895018000  | 0.053016000  |
| 7  | -0.178243000 | 3.060989000  | 0.058527000  |
| 6  | -0.113765000 | -1.894126000 | 0.053093000  |
| 7  | -0.200671000 | -3.059486000 | 0.058725000  |
| 6  | -0.321321000 | -4.465927000 | 0.099831000  |
| 1  | 0.305166000  | -4.871377000 | 0.897399000  |
| 1  | -1.360579000 | -4.744655000 | 0.287460000  |
| 1  | -0.005455000 | -4.895742000 | -0.853196000 |
| 6  | -3.561835000 | 0.011318000  | -2.689368000 |
| 1  | -4.468330000 | -0.039793000 | -2.081967000 |
| 1  | -3.584807000 | 0.925810000  | -3.285971000 |

|   |              |              |              |
|---|--------------|--------------|--------------|
| 1 | -3.534948000 | -0.849494000 | -3.361001000 |
| 6 | -2.385721000 | 0.009515000  | 3.807158000  |
| 1 | -2.159620000 | -0.880588000 | 4.398825000  |
| 1 | -2.149454000 | 0.895870000  | 4.400485000  |
| 1 | -3.452983000 | 0.015846000  | 3.572906000  |
| 6 | -0.288078000 | 4.468324000  | 0.099281000  |
| 1 | -1.317752000 | 4.754497000  | 0.324738000  |
| 1 | 0.370418000  | 4.872172000  | 0.871475000  |
| 1 | -0.005309000 | 4.893005000  | -0.866359000 |
| 1 | 3.504920000  | -0.012080000 | -1.598627000 |

**[3b-H]<sup>+</sup>**, TE = - 2081.014766

|    |              |              |              |
|----|--------------|--------------|--------------|
| 6  | -1.423374000 | 1.099937000  | -2.026819000 |
| 6  | -1.649297000 | 0.209476000  | 0.110562000  |
| 7  | -2.276453000 | 0.762570000  | -1.002987000 |
| 7  | -0.177968000 | 0.877274000  | -1.897915000 |
| 25 | 0.343808000  | 0.059942000  | -0.103046000 |
| 6  | 2.150204000  | -0.073198000 | -0.619406000 |
| 7  | 3.277983000  | -0.166371000 | -0.925235000 |
| 6  | 0.833307000  | -0.696687000 | 1.518116000  |
| 7  | 1.238321000  | -1.187563000 | 2.506485000  |
| 6  | 0.043477000  | -1.680715000 | -0.770688000 |
| 7  | -0.131429000 | -2.768241000 | -1.170490000 |
| 6  | 0.667176000  | 1.779711000  | 0.622395000  |
| 7  | 0.874952000  | 2.835422000  | 1.085104000  |
| 6  | 1.148319000  | 4.092783000  | 1.664993000  |
| 1  | 0.915730000  | 4.072109000  | 2.732356000  |
| 1  | 2.204168000  | 4.343337000  | 1.538299000  |
| 1  | 0.542515000  | 4.866120000  | 1.187243000  |
| 6  | 4.641318000  | -0.286147000 | -1.269070000 |
| 1  | 5.242655000  | 0.396592000  | -0.664061000 |
| 1  | 4.984736000  | -1.308587000 | -1.094346000 |
| 1  | 4.786618000  | -0.041715000 | -2.324177000 |
| 6  | 1.763199000  | -1.773873000 | 3.676390000  |
| 1  | 0.977876000  | -1.898220000 | 4.427149000  |

|   |              |              |              |
|---|--------------|--------------|--------------|
| 1 | 2.187934000  | -2.755286000 | 3.450100000  |
| 1 | 2.549374000  | -1.141131000 | 4.096230000  |
| 6 | -0.282483000 | -4.087702000 | -1.648282000 |
| 1 | 0.630869000  | -4.411448000 | -2.153068000 |
| 1 | -0.485458000 | -4.766919000 | -0.816875000 |
| 1 | -1.113159000 | -4.139041000 | -2.355982000 |
| 6 | 0.704441000  | 1.230626000  | -2.987836000 |
| 6 | -3.606099000 | 1.377990000  | -1.025010000 |
| 7 | -2.495963000 | -0.249770000 | 1.043676000  |
| 6 | -2.036350000 | -0.506919000 | 2.396336000  |
| 1 | -2.854257000 | -0.281073000 | 3.086817000  |
| 1 | -1.745583000 | -1.555023000 | 2.530118000  |
| 1 | -1.193367000 | 0.136802000  | 2.627569000  |
| 6 | -3.807586000 | -0.833417000 | 0.772954000  |
| 1 | -4.632725000 | -0.208602000 | 1.128815000  |
| 1 | -3.929494000 | -1.032558000 | -0.289796000 |
| 1 | -3.860969000 | -1.792032000 | 1.297223000  |
| 1 | 0.167073000  | 1.694709000  | -3.822388000 |
| 1 | 1.467392000  | 1.923899000  | -2.624827000 |
| 1 | 1.215872000  | 0.335055000  | -3.350030000 |
| 1 | -3.884699000 | 1.668066000  | -0.012251000 |
| 1 | -3.564291000 | 2.284500000  | -1.630586000 |
| 1 | -4.376476000 | 0.722042000  | -1.435808000 |
| 1 | -1.871153000 | 1.555434000  | -2.909847000 |

**[3c-H]<sup>+</sup>**, TE = - 2061.650002

|    |              |              |              |
|----|--------------|--------------|--------------|
| 6  | 2.019733000  | -0.010708000 | -1.898571000 |
| 6  | 1.748650000  | -0.000631000 | 0.393696000  |
| 7  | 2.621810000  | -0.006719000 | -0.666317000 |
| 7  | 0.746889000  | -0.008631000 | -1.942837000 |
| 25 | -0.148009000 | 0.000323000  | -0.098747000 |
| 6  | -1.883459000 | -0.001620000 | -0.862644000 |
| 7  | -2.962613000 | -0.003032000 | -1.315812000 |
| 6  | -0.941508000 | 0.008905000  | 1.581674000  |

|   |              |              |              |
|---|--------------|--------------|--------------|
| 7 | -1.525752000 | 0.014088000  | 2.600476000  |
| 6 | -0.183405000 | 1.894687000  | -0.087816000 |
| 7 | -0.214794000 | 3.064222000  | -0.071449000 |
| 6 | -0.188055000 | -1.893660000 | -0.071285000 |
| 7 | -0.222818000 | -3.062928000 | -0.045419000 |
| 6 | -0.279059000 | -4.473079000 | 0.000877000  |
| 1 | 0.617517000  | -4.869039000 | 0.483189000  |
| 1 | -1.156917000 | -4.792857000 | 0.566836000  |
| 1 | -0.344471000 | -4.877928000 | -1.011507000 |
| 6 | -4.273836000 | -0.007040000 | -1.839554000 |
| 1 | -4.916787000 | -0.648014000 | -1.232041000 |
| 1 | -4.680589000 | 1.006711000  | -1.837647000 |
| 1 | -4.267182000 | -0.383700000 | -2.865004000 |
| 6 | -2.261415000 | 0.021935000  | 3.804247000  |
| 1 | -2.854042000 | -0.892249000 | 3.889601000  |
| 1 | -1.587414000 | 0.083070000  | 4.662885000  |
| 1 | -2.936408000 | 0.881071000  | 3.827804000  |
| 6 | -0.264701000 | 4.474905000  | -0.036130000 |
| 1 | -1.029976000 | 4.803147000  | 0.670851000  |
| 1 | 0.701859000  | 4.876996000  | 0.275803000  |
| 1 | -0.507722000 | 4.865611000  | -1.026806000 |
| 6 | 0.096651000  | -0.012786000 | -3.234493000 |
| 6 | 4.074435000  | -0.009679000 | -0.531236000 |
| 8 | 2.473385000  | 0.002188000  | 1.495243000  |
| 6 | 1.831262000  | 0.008759000  | 2.766635000  |
| 1 | 1.215754000  | -0.883477000 | 2.883700000  |
| 1 | 2.637564000  | 0.010890000  | 3.498650000  |
| 1 | 1.218273000  | 0.903748000  | 2.875724000  |
| 1 | 4.520005000  | -0.012897000 | -1.525831000 |
| 1 | 4.409068000  | 0.877108000  | 0.008741000  |
| 1 | 4.405165000  | -0.895528000 | 0.012732000  |
| 1 | -0.542319000 | 0.869611000  | -3.323164000 |
| 1 | 0.815805000  | -0.016362000 | -4.060886000 |
| 1 | -0.543474000 | -0.895045000 | -3.316667000 |
| 1 | 2.668623000  | -0.015384000 | -2.773115000 |

[3'a-H]<sup>+</sup>, TE = - 2330.238460

|    |              |              |              |
|----|--------------|--------------|--------------|
| 6  | -1.070965000 | -1.369232000 | -0.175531000 |
| 6  | -1.332366000 | 0.899950000  | 0.048688000  |
| 1  | -2.082487000 | 1.692111000  | 0.143688000  |
| 7  | -1.943736000 | -0.309935000 | -0.068671000 |
| 7  | 0.179908000  | -1.082713000 | -0.148638000 |
| 25 | 0.543223000  | 0.938705000  | 0.080360000  |
| 6  | 2.458688000  | 0.748650000  | 0.143656000  |
| 7  | 3.617193000  | 0.616399000  | 0.200715000  |
| 6  | 0.538668000  | 2.782111000  | 0.294214000  |
| 7  | 0.476908000  | 3.944357000  | 0.426373000  |
| 6  | 0.591255000  | 0.770981000  | 1.971352000  |
| 7  | 0.628979000  | 0.689887000  | 3.135738000  |
| 6  | 0.700773000  | 1.216973000  | -1.791695000 |
| 7  | 0.801819000  | 1.413165000  | -2.939243000 |
| 6  | 0.900468000  | 1.677035000  | -4.323232000 |
| 1  | 0.058531000  | 2.293469000  | -4.646018000 |
| 1  | 1.831469000  | 2.206922000  | -4.535975000 |
| 1  | 0.888928000  | 0.739287000  | -4.883080000 |
| 6  | 5.006520000  | 0.375347000  | 0.269715000  |
| 1  | 5.528422000  | 0.987806000  | -0.468523000 |
| 1  | 5.377913000  | 0.626769000  | 1.265364000  |
| 1  | 5.206611000  | -0.679908000 | 0.068890000  |
| 6  | 0.446804000  | 5.345898000  | 0.590755000  |
| 1  | -0.002266000 | 5.817313000  | -0.286480000 |
| 1  | -0.143518000 | 5.607775000  | 1.471875000  |
| 1  | 1.461493000  | 5.730787000  | 0.717925000  |
| 6  | 0.678114000  | 0.618576000  | 4.545166000  |
| 1  | 1.234840000  | 1.470960000  | 4.940681000  |
| 1  | -0.334145000 | 0.634212000  | 4.954966000  |
| 1  | 1.174202000  | -0.303962000 | 4.854349000  |
| 6  | 1.102445000  | -2.158631000 | -0.231031000 |
| 6  | 2.079322000  | -2.148978000 | -1.225779000 |
| 6  | 1.048561000  | -3.214739000 | 0.677504000  |

|   |              |              |              |
|---|--------------|--------------|--------------|
| 6 | 2.977497000  | -3.202622000 | -1.321817000 |
| 1 | 2.111859000  | -1.323267000 | -1.927441000 |
| 6 | 1.958853000  | -4.261528000 | 0.581223000  |
| 1 | 0.307254000  | -3.202700000 | 1.470464000  |
| 6 | 2.922912000  | -4.260732000 | -0.418717000 |
| 1 | 3.720756000  | -3.202982000 | -2.112586000 |
| 1 | 1.913188000  | -5.078593000 | 1.293462000  |
| 1 | 3.629180000  | -5.080172000 | -0.495353000 |
| 6 | -3.359687000 | -0.523774000 | -0.102550000 |
| 6 | -3.938309000 | -1.482364000 | 0.723201000  |
| 6 | -4.144501000 | 0.239626000  | -0.960372000 |
| 6 | -5.313092000 | -1.679936000 | 0.681901000  |
| 1 | -3.322721000 | -2.055570000 | 1.408993000  |
| 6 | -5.519306000 | 0.045111000  | -0.983511000 |
| 1 | -3.677619000 | 0.968413000  | -1.614495000 |
| 6 | -6.105102000 | -0.915955000 | -0.167212000 |
| 1 | -5.766571000 | -2.425284000 | 1.326158000  |
| 1 | -6.132984000 | 0.637890000  | -1.653064000 |
| 1 | -7.178204000 | -1.069689000 | -0.193100000 |
| 1 | -1.477515000 | -2.367926000 | -0.309171000 |

**[3'b-H]<sup>+</sup>**, TE = - 2464.026126

|    |              |              |              |
|----|--------------|--------------|--------------|
| 6  | 0.894603000  | -1.475113000 | -0.155971000 |
| 6  | 1.230197000  | 0.840112000  | -0.113278000 |
| 7  | 1.795258000  | -0.440121000 | -0.229929000 |
| 7  | -0.348538000 | -1.217081000 | -0.017142000 |
| 25 | -0.774231000 | 0.796476000  | 0.039891000  |
| 6  | -2.625533000 | 0.443509000  | 0.007946000  |
| 7  | -3.775069000 | 0.226490000  | -0.034934000 |
| 6  | -1.187593000 | 2.601961000  | 0.042587000  |
| 7  | -1.550361000 | 3.720131000  | 0.033721000  |
| 6  | -0.803731000 | 0.857267000  | -1.847238000 |
| 7  | -0.837355000 | 0.920533000  | -3.016682000 |
| 6  | -0.774715000 | 0.818953000  | 1.933620000  |
| 7  | -0.785184000 | 0.859287000  | 3.104777000  |

|   |              |              |              |
|---|--------------|--------------|--------------|
| 6 | -0.811364000 | 0.927533000  | 4.514261000  |
| 1 | -0.131199000 | 1.706893000  | 4.866415000  |
| 1 | -1.821620000 | 1.158737000  | 4.860210000  |
| 1 | -0.502218000 | -0.029267000 | 4.941658000  |
| 6 | -5.129698000 | -0.164480000 | -0.081104000 |
| 1 | -5.701450000 | 0.367682000  | 0.682667000  |
| 1 | -5.553706000 | 0.064064000  | -1.061638000 |
| 1 | -5.208262000 | -1.240059000 | 0.098076000  |
| 6 | -2.047404000 | 5.039533000  | 0.027033000  |
| 1 | -1.225831000 | 5.758039000  | 0.093802000  |
| 1 | -2.602982000 | 5.229755000  | -0.894888000 |
| 1 | -2.716830000 | 5.195472000  | 0.876934000  |
| 6 | -0.958330000 | 1.012212000  | -4.419844000 |
| 1 | -1.450285000 | 0.119180000  | -4.812659000 |
| 1 | -1.553409000 | 1.888683000  | -4.687343000 |
| 1 | 0.028453000  | 1.102829000  | -4.879879000 |
| 6 | -1.242395000 | -2.319283000 | 0.006621000  |
| 6 | -2.094882000 | -2.492643000 | 1.096341000  |
| 6 | -1.281864000 | -3.223184000 | -1.053461000 |
| 6 | -2.960260000 | -3.577387000 | 1.130168000  |
| 1 | -2.059260000 | -1.781216000 | 1.913738000  |
| 6 | -2.157137000 | -4.303531000 | -1.016130000 |
| 1 | -0.640145000 | -3.065106000 | -1.914731000 |
| 6 | -2.996388000 | -4.485649000 | 0.075195000  |
| 1 | -3.605939000 | -3.720585000 | 1.990730000  |
| 1 | -2.182514000 | -5.002161000 | -1.845833000 |
| 1 | -3.675741000 | -5.330537000 | 0.105995000  |
| 6 | 3.171593000  | -0.807955000 | -0.007115000 |
| 6 | 3.834185000  | -1.603096000 | -0.936357000 |
| 6 | 3.806340000  | -0.421674000 | 1.169033000  |
| 6 | 5.141977000  | -2.004595000 | -0.691228000 |
| 1 | 3.330937000  | -1.896433000 | -1.852588000 |
| 6 | 5.119244000  | -0.814002000 | 1.399897000  |
| 1 | 3.271650000  | 0.180316000  | 1.896175000  |
| 6 | 5.788739000  | -1.605253000 | 0.472694000  |

|   |             |              |              |
|---|-------------|--------------|--------------|
| 1 | 5.657770000 | -2.625246000 | -1.415958000 |
| 1 | 5.615803000 | -0.511528000 | 2.315709000  |
| 1 | 6.811107000 | -1.914779000 | 0.659757000  |
| 7 | 2.087841000 | 1.846573000  | -0.299843000 |
| 6 | 1.748518000 | 3.191911000  | 0.129351000  |
| 1 | 2.654815000 | 3.666346000  | 0.517502000  |
| 1 | 1.370293000 | 3.793696000  | -0.704181000 |
| 1 | 1.003245000 | 3.152955000  | 0.917431000  |
| 6 | 3.323491000 | 1.806436000  | -1.078928000 |
| 1 | 4.214544000 | 1.791570000  | -0.444675000 |
| 1 | 3.341917000 | 0.942479000  | -1.738288000 |
| 1 | 3.350037000 | 2.708319000  | -1.696977000 |
| 1 | 1.304874000 | -2.482145000 | -0.188764000 |

**[3'*c*-H]<sup>+</sup>**, TE = - 2444.656363

|    |              |              |              |
|----|--------------|--------------|--------------|
| 6  | -0.998772000 | -1.461758000 | -0.051457000 |
| 6  | -1.281819000 | 0.841655000  | -0.016683000 |
| 7  | -1.875444000 | -0.410847000 | -0.010398000 |
| 7  | 0.253612000  | -1.203268000 | -0.098620000 |
| 25 | 0.668777000  | 0.825616000  | 0.004875000  |
| 6  | 2.539076000  | 0.494302000  | 0.044640000  |
| 7  | 3.689436000  | 0.292385000  | 0.089405000  |
| 6  | 1.025382000  | 2.640796000  | 0.145255000  |
| 7  | 1.345761000  | 3.766665000  | 0.239410000  |
| 6  | 0.672912000  | 0.726678000  | 1.896973000  |
| 7  | 0.688900000  | 0.680140000  | 3.065766000  |
| 6  | 0.738503000  | 0.991641000  | -1.880640000 |
| 7  | 0.785367000  | 1.115857000  | -3.043596000 |
| 6  | 0.834764000  | 1.285453000  | -4.444519000 |
| 1  | -0.123424000 | 1.661166000  | -4.810903000 |
| 1  | 1.619411000  | 1.998657000  | -4.706969000 |
| 1  | 1.048505000  | 0.330330000  | -4.929683000 |
| 6  | 5.053335000  | -0.066588000 | 0.142908000  |
| 1  | 5.613092000  | 0.470469000  | -0.625950000 |
| 1  | 5.467558000  | 0.183556000  | 1.122047000  |



|   |              |              |              |
|---|--------------|--------------|--------------|
| 1 | 5.155413000  | -1.142002000 | -0.023491000 |
| 6 | 1.778834000  | 5.104793000  | 0.348962000  |
| 1 | 2.467974000  | 5.345530000  | -0.464328000 |
| 1 | 0.926123000  | 5.787142000  | 0.298721000  |
| 1 | 2.293101000  | 5.257406000  | 1.301051000  |
| 6 | 0.755788000  | 0.631157000  | 4.475267000  |
| 1 | 1.150022000  | 1.573511000  | 4.862336000  |
| 1 | -0.239553000 | 0.466009000  | 4.893700000  |
| 1 | 1.412433000  | -0.183317000 | 4.789574000  |
| 6 | 1.150539000  | -2.302706000 | -0.086287000 |
| 6 | 2.095285000  | -2.431163000 | -1.103831000 |
| 6 | 1.101661000  | -3.248182000 | 0.936806000  |
| 6 | 2.965656000  | -3.512617000 | -1.105538000 |
| 1 | 2.126119000  | -1.688896000 | -1.893821000 |
| 6 | 1.981966000  | -4.324722000 | 0.932459000  |
| 1 | 0.386229000  | -3.127195000 | 1.744357000  |
| 6 | 2.913941000  | -4.461824000 | -0.088052000 |
| 1 | 3.683302000  | -3.621574000 | -1.912443000 |
| 1 | 1.938141000  | -5.056402000 | 1.732308000  |
| 1 | 3.597131000  | -5.304129000 | -0.093112000 |
| 6 | -3.291335000 | -0.668247000 | -0.040457000 |
| 6 | -4.062352000 | -0.426129000 | 1.090194000  |
| 6 | -3.864812000 | -1.184112000 | -1.196025000 |
| 6 | -5.422558000 | -0.702989000 | 1.059200000  |
| 1 | -3.597318000 | -0.025035000 | 1.984020000  |
| 6 | -5.225737000 | -1.467673000 | -1.216448000 |
| 1 | -3.250065000 | -1.357681000 | -2.073500000 |
| 6 | -6.004426000 | -1.225287000 | -0.091455000 |
| 1 | -6.029121000 | -0.516697000 | 1.938854000  |
| 1 | -5.676897000 | -1.874253000 | -2.115013000 |
| 1 | -7.066453000 | -1.444584000 | -0.109827000 |
| 8 | -2.244555000 | 1.734463000  | -0.047379000 |
| 6 | -1.929503000 | 3.122558000  | -0.085797000 |
| 1 | -1.287814000 | 3.342574000  | -0.939293000 |
| 1 | -2.886533000 | 3.631973000  | -0.188130000 |

|   |              |              |              |
|---|--------------|--------------|--------------|
| 1 | -1.438079000 | 3.423629000  | 0.839953000  |
| 1 | -1.423670000 | -2.463059000 | -0.049934000 |

[4'a-H]<sup>+</sup>, TE = - 2443.566885

|   |              |              |              |
|---|--------------|--------------|--------------|
| 6 | 1.045805000  | -1.178553000 | -0.285545000 |
| 6 | 1.305992000  | 1.190669000  | -0.197513000 |
| 1 | 1.538900000  | 1.699802000  | -1.139331000 |
| 7 | -0.235611000 | -0.979722000 | -0.197713000 |
| 1 | 1.805304000  | 1.751297000  | 0.599582000  |
| 6 | -0.843625000 | 2.785911000  | 0.309458000  |
| 6 | -0.317529000 | 0.730708000  | 1.894249000  |
| 6 | -0.907399000 | 1.156275000  | -1.775208000 |
| 7 | -0.886392000 | 3.941714000  | 0.449940000  |
| 7 | -0.982235000 | 1.270248000  | -2.931097000 |
| 7 | -0.036447000 | 0.574941000  | 3.012251000  |
| 6 | 0.314008000  | 0.374658000  | 4.367611000  |
| 1 | 1.395444000  | 0.253831000  | 4.454560000  |
| 1 | 0.000026000  | 1.236237000  | 4.959752000  |
| 1 | -0.181461000 | -0.520994000 | 4.747008000  |
| 6 | -0.934321000 | 5.344056000  | 0.622139000  |
| 1 | -0.497270000 | 5.612883000  | 1.585722000  |
| 1 | -0.370689000 | 5.833837000  | -0.174368000 |
| 1 | -1.970691000 | 5.686017000  | 0.590848000  |
| 6 | -1.050792000 | 1.391244000  | -4.339054000 |
| 1 | -0.422879000 | 2.221404000  | -4.668070000 |
| 1 | -0.697513000 | 0.468459000  | -4.803054000 |
| 1 | -2.082067000 | 1.576811000  | -4.644793000 |
| 6 | -1.087557000 | -2.107585000 | -0.216469000 |
| 6 | -2.171863000 | -2.151656000 | -1.094758000 |
| 6 | -0.869531000 | -3.185150000 | 0.645713000  |
| 6 | -3.008568000 | -3.259590000 | -1.119917000 |
| 1 | -2.339048000 | -1.320271000 | -1.770562000 |
| 6 | -1.708236000 | -4.292959000 | 0.614357000  |
| 1 | -0.048734000 | -3.144197000 | 1.355511000  |
| 6 | -2.781168000 | -4.335675000 | -0.267361000 |

|    |              |              |              |
|----|--------------|--------------|--------------|
| 1  | -3.835788000 | -3.290035000 | -1.822149000 |
| 1  | -1.524970000 | -5.123239000 | 1.288566000  |
| 1  | -3.434726000 | -5.200755000 | -0.291483000 |
| 26 | -0.703776000 | 0.966049000  | 0.076942000  |
| 6  | -2.535126000 | 0.655109000  | 0.365460000  |
| 7  | -3.663934000 | 0.456219000  | 0.568421000  |
| 6  | -5.016804000 | 0.115179000  | 0.793920000  |
| 1  | -5.665672000 | 0.752589000  | 0.190325000  |
| 1  | -5.175720000 | -0.929743000 | 0.518298000  |
| 1  | -5.261904000 | 0.250793000  | 1.848958000  |
| 7  | 1.898607000  | -0.155950000 | -0.233510000 |
| 6  | 3.301323000  | -0.361993000 | -0.244307000 |
| 6  | 4.138439000  | 0.588516000  | -0.828920000 |
| 6  | 3.864166000  | -1.495639000 | 0.347921000  |
| 6  | 5.512793000  | 0.389940000  | -0.844606000 |
| 1  | 3.715305000  | 1.478912000  | -1.277947000 |
| 6  | 5.238149000  | -1.691440000 | 0.314452000  |
| 1  | 3.235719000  | -2.216806000 | 0.859696000  |
| 6  | 6.070292000  | -0.751883000 | -0.282447000 |
| 1  | 6.151613000  | 1.134995000  | -1.307156000 |
| 1  | 5.660335000  | -2.577636000 | 0.776461000  |
| 1  | 7.143748000  | -0.903238000 | -0.298960000 |
| 1  | 1.454742000  | -2.176093000 | -0.432643000 |

[4'b-H]<sup>+</sup>, TE = -5591.060377

|   |              |              |              |
|---|--------------|--------------|--------------|
| 6 | -1.257691000 | 1.211636000  | -0.263344000 |
| 6 | -1.373331000 | -1.189583000 | -0.210650000 |
| 1 | -1.595081000 | -1.689721000 | -1.159334000 |
| 7 | 0.039616000  | 1.127528000  | -0.186307000 |
| 1 | -1.841409000 | -1.784683000 | 0.579532000  |
| 6 | 1.059706000  | -2.763158000 | 0.267631000  |
| 6 | 0.345444000  | -0.702315000 | 1.993813000  |
| 6 | 0.929207000  | -1.034240000 | -1.907855000 |
| 7 | 1.221611000  | -3.911983000 | 0.390115000  |
| 7 | 1.001207000  | -1.131192000 | -3.065493000 |

|   |              |              |              |
|---|--------------|--------------|--------------|
| 7 | 0.082720000  | -0.601300000 | 3.122500000  |
| 6 | -0.235793000 | -0.475254000 | 4.494323000  |
| 1 | -1.318069000 | -0.400142000 | 4.615350000  |
| 1 | 0.126799000  | -1.350142000 | 5.037194000  |
| 1 | 0.236586000  | 0.421199000  | 4.900378000  |
| 6 | 1.412136000  | -5.303639000 | 0.542686000  |
| 1 | 0.562679000  | -5.738416000 | 1.073587000  |
| 1 | 1.498074000  | -5.775394000 | -0.438314000 |
| 1 | 2.324981000  | -5.493834000 | 1.111032000  |
| 6 | 1.080489000  | -1.241520000 | -4.473132000 |
| 1 | 0.576071000  | -2.152925000 | -4.799517000 |
| 1 | 0.597864000  | -0.378536000 | -4.935722000 |
| 1 | 2.126775000  | -1.278337000 | -4.782371000 |
| 6 | 0.789701000  | 2.327077000  | -0.212901000 |
| 6 | 1.880921000  | 2.443813000  | -1.075217000 |
| 6 | 0.466440000  | 3.398010000  | 0.623201000  |
| 6 | 2.621013000  | 3.617637000  | -1.112189000 |
| 1 | 2.129514000  | 1.613792000  | -1.727242000 |
| 6 | 1.209063000  | 4.572352000  | 0.579199000  |
| 1 | -0.356747000 | 3.301824000  | 1.324642000  |
| 6 | 2.288572000  | 4.688151000  | -0.287428000 |
| 1 | 3.455754000  | 3.703323000  | -1.800716000 |
| 1 | 0.945973000  | 5.396545000  | 1.233999000  |
| 1 | 2.867667000  | 5.604441000  | -0.319959000 |
| 6 | 2.645537000  | -0.397073000 | 0.333792000  |
| 7 | 3.753672000  | -0.089110000 | 0.519972000  |
| 6 | 5.072207000  | 0.369795000  | 0.738205000  |
| 1 | 5.752733000  | -0.106454000 | 0.029719000  |
| 1 | 5.106467000  | 1.452884000  | 0.601160000  |
| 1 | 5.385959000  | 0.125343000  | 1.754900000  |
| 7 | -2.033621000 | 0.129908000  | -0.218115000 |
| 6 | -3.448105000 | 0.251741000  | -0.213686000 |
| 6 | -4.232456000 | -0.717525000 | -0.838096000 |
| 6 | -4.070091000 | 1.322417000  | 0.433326000  |
| 6 | -5.616048000 | -0.598005000 | -0.837605000 |

|    |              |              |              |
|----|--------------|--------------|--------------|
| 1  | -3.762912000 | -1.560147000 | -1.330861000 |
| 6  | -5.453184000 | 1.440532000  | 0.415578000  |
| 1  | -3.478312000 | 2.053166000  | 0.974581000  |
| 6  | -6.233854000 | 0.482742000  | -0.220272000 |
| 1  | -6.214504000 | -1.356082000 | -1.331678000 |
| 1  | -5.922256000 | 2.278639000  | 0.920045000  |
| 1  | -7.314317000 | 0.572551000  | -0.225018000 |
| 44 | 0.730015000  | -0.875494000 | 0.057653000  |
| 1  | -1.746675000 | 2.174331000  | -0.397109000 |

**[5a-H]<sup>+</sup>**, TE = - 2443.566885

|   |              |              |              |
|---|--------------|--------------|--------------|
| 6 | 0.299659000  | 1.369703000  | -0.873617000 |
| 6 | -1.724236000 | 0.001072000  | -0.567721000 |
| 6 | 0.298036000  | -1.369858000 | -0.874097000 |
| 7 | -1.142238000 | -1.180183000 | -0.636758000 |
| 7 | -1.140841000 | 1.181678000  | -0.636353000 |
| 6 | -1.979090000 | -2.331041000 | -0.485419000 |
| 6 | -1.846979000 | -3.397923000 | -1.371390000 |
| 6 | -2.911357000 | -2.395801000 | 0.547605000  |
| 6 | -2.658682000 | -4.514653000 | -1.229242000 |
| 1 | -1.119975000 | -3.343803000 | -2.173574000 |
| 6 | -3.727702000 | -3.513404000 | 0.676425000  |
| 1 | -2.984556000 | -1.581984000 | 1.262225000  |
| 6 | -3.603465000 | -4.575618000 | -0.209911000 |
| 1 | -2.559330000 | -5.338952000 | -1.927349000 |
| 1 | -4.452109000 | -3.558251000 | 1.482668000  |
| 1 | -4.236388000 | -5.449809000 | -0.104888000 |
| 6 | -1.976315000 | 2.333485000  | -0.484645000 |
| 6 | -1.842400000 | 3.400815000  | -1.369809000 |
| 6 | -2.908975000 | 2.398793000  | 0.547997000  |
| 6 | -2.652701000 | 4.518515000  | -1.227282000 |
| 1 | -1.115080000 | 3.346337000  | -2.171679000 |
| 6 | -3.723908000 | 3.517378000  | 0.677198000  |
| 1 | -2.983609000 | 1.584599000  | 1.262037000  |
| 6 | -3.597873000 | 4.580037000  | -0.208351000 |

|    |              |              |              |
|----|--------------|--------------|--------------|
| 1  | -2.551916000 | 5.343166000  | -1.924767000 |
| 1  | -4.448622000 | 3.562622000  | 1.483143000  |
| 1  | -4.229692000 | 5.454988000  | -0.103021000 |
| 1  | 0.449000000  | -1.343938000 | -1.958943000 |
| 1  | 0.506182000  | -2.389212000 | -0.545775000 |
| 1  | 0.509063000  | 2.388674000  | -0.544923000 |
| 1  | 0.450511000  | 1.344151000  | -1.958492000 |
| 26 | 1.535723000  | -0.000969000 | 0.024603000  |
| 6  | 0.493015000  | -0.000866000 | 1.553588000  |
| 7  | -0.133633000 | -0.000852000 | 2.539195000  |
| 6  | 2.565795000  | 1.374674000  | 0.716051000  |
| 7  | 3.194575000  | 2.265050000  | 1.135151000  |
| 6  | 2.539693000  | -0.001405000 | -1.537677000 |
| 7  | 3.146904000  | -0.001956000 | -2.533498000 |
| 6  | 2.564648000  | -1.377825000 | 0.715353000  |
| 7  | 3.192988000  | -2.268819000 | 1.133792000  |
| 6  | 3.960920000  | 3.337846000  | 1.642662000  |
| 1  | 4.423885000  | 3.050250000  | 2.589047000  |
| 1  | 4.744504000  | 3.604124000  | 0.930234000  |
| 1  | 3.320944000  | 4.207056000  | 1.808344000  |
| 6  | -0.826638000 | -0.000985000 | 3.769872000  |
| 1  | -0.113339000 | 0.002749000  | 4.597037000  |
| 1  | -1.457372000 | 0.887791000  | 3.844343000  |
| 1  | -1.451628000 | -0.893554000 | 3.847354000  |
| 6  | 3.959313000  | -3.341834000 | 1.640882000  |
| 1  | 4.747030000  | -3.603468000 | 0.931297000  |
| 1  | 4.416913000  | -3.056873000 | 2.590666000  |
| 1  | 3.320563000  | -4.213175000 | 1.800003000  |
| 6  | 3.900527000  | -0.004344000 | -3.729216000 |
| 1  | 3.806747000  | -0.972458000 | -4.225312000 |
| 1  | 3.536084000  | 0.776709000  | -4.399421000 |
| 1  | 4.952748000  | 0.181083000  | -3.504032000 |
| 1  | -2.803335000 | 0.001685000  | -0.466880000 |

[5b-H]<sup>+</sup>, TE = - 5630.257423

|   |              |              |              |
|---|--------------|--------------|--------------|
| 6 | 0.133377000  | 1.413562000  | -0.923417000 |
| 6 | -1.872394000 | 0.004183000  | -0.590803000 |
| 6 | 0.128204000  | -1.410810000 | -0.929588000 |
| 7 | -1.303712000 | -1.184116000 | -0.669625000 |
| 7 | -1.299538000 | 1.190753000  | -0.665457000 |
| 6 | -2.158828000 | -2.320388000 | -0.499087000 |
| 6 | -2.080690000 | -3.381701000 | -1.397614000 |
| 6 | -3.053071000 | -2.374346000 | 0.567137000  |
| 6 | -2.909839000 | -4.482637000 | -1.234074000 |
| 1 | -1.381694000 | -3.335914000 | -2.224878000 |
| 6 | -3.887167000 | -3.475987000 | 0.717684000  |
| 1 | -3.081675000 | -1.564748000 | 1.289655000  |
| 6 | -3.817611000 | -4.532664000 | -0.180989000 |
| 1 | -2.853294000 | -5.303023000 | -1.941449000 |
| 1 | -4.582107000 | -3.513132000 | 1.549807000  |
| 1 | -4.464195000 | -5.394636000 | -0.059601000 |
| 6 | -2.150942000 | 2.329489000  | -0.492488000 |
| 6 | -2.068254000 | 3.392982000  | -1.388023000 |
| 6 | -3.045959000 | 2.383675000  | 0.573066000  |
| 6 | -2.893669000 | 4.496386000  | -1.222253000 |
| 1 | -1.368598000 | 3.347058000  | -2.214716000 |
| 6 | -3.876293000 | 3.487854000  | 0.725864000  |
| 1 | -3.078112000 | 1.572239000  | 1.293365000  |
| 6 | -3.802220000 | 4.546723000  | -0.169863000 |
| 1 | -2.833575000 | 5.318502000  | -1.927322000 |
| 1 | -4.571854000 | 3.525171000  | 1.557460000  |
| 1 | -4.445902000 | 5.410615000  | -0.046718000 |
| 1 | 0.266914000  | -1.381033000 | -2.015879000 |
| 1 | 0.316365000  | -2.436410000 | -0.610592000 |
| 1 | 0.324912000  | 2.436965000  | -0.599374000 |
| 1 | 0.272480000  | 1.388822000  | -2.009784000 |
| 6 | 0.372232000  | -0.005235000 | 1.649260000  |
| 7 | -0.249021000 | -0.006757000 | 2.638040000  |

|    |              |              |              |
|----|--------------|--------------|--------------|
| 6  | 2.573612000  | 1.455311000  | 0.745793000  |
| 7  | 3.203270000  | 2.347732000  | 1.160719000  |
| 6  | 2.512163000  | -0.001751000 | -1.659444000 |
| 7  | 3.108636000  | -0.001464000 | -2.661202000 |
| 6  | 2.570067000  | -1.467563000 | 0.738938000  |
| 7  | 3.198442000  | -2.362986000 | 1.149299000  |
| 6  | 3.977339000  | 3.414331000  | 1.668539000  |
| 1  | 4.459299000  | 3.114376000  | 2.601650000  |
| 1  | 4.746466000  | 3.692111000  | 0.944745000  |
| 1  | 3.339643000  | 4.280295000  | 1.858675000  |
| 6  | -0.923508000 | -0.008861000 | 3.878831000  |
| 1  | -0.197548000 | -0.017643000 | 4.694887000  |
| 1  | -1.544623000 | 0.885291000  | 3.967845000  |
| 1  | -1.555852000 | -0.895976000 | 3.958734000  |
| 6  | 3.972008000  | -3.432184000 | 1.652401000  |
| 1  | 4.743020000  | -3.705013000 | 0.928735000  |
| 1  | 4.451599000  | -3.137574000 | 2.588435000  |
| 1  | 3.334444000  | -4.299686000 | 1.835837000  |
| 6  | 3.858061000  | -0.002919000 | -3.859298000 |
| 1  | 4.125280000  | -1.027028000 | -4.127610000 |
| 1  | 3.267470000  | 0.435534000  | -4.666066000 |
| 1  | 4.770294000  | 0.581991000  | -3.725324000 |
| 44 | 1.465245000  | -0.003073000 | 0.014042000  |
| 1  | -2.949664000 | 0.005865000  | -0.470969000 |

**[6a-H]<sup>+</sup>**, TE = - 2630.770814

|   |              |              |              |
|---|--------------|--------------|--------------|
| 6 | 0.290279000  | 1.451436000  | 0.265721000  |
| 7 | -1.207925000 | 1.218783000  | 0.143094000  |
| 6 | -1.787888000 | 0.033612000  | 0.124023000  |
| 7 | -1.244882000 | -1.161782000 | 0.232478000  |
| 6 | 0.249045000  | -1.424218000 | 0.429468000  |
| 8 | 0.553646000  | 2.596830000  | 0.507106000  |
| 6 | -2.083111000 | 2.361075000  | 0.155010000  |
| 6 | -1.996769000 | 3.297884000  | -0.868259000 |
| 6 | -2.854670000 | 4.388144000  | -0.867444000 |



|    |              |              |              |
|----|--------------|--------------|--------------|
| 6  | -3.792576000 | 4.542851000  | 0.148825000  |
| 6  | -3.866689000 | 3.607731000  | 1.172835000  |
| 6  | -3.003918000 | 2.517118000  | 1.183782000  |
| 1  | -1.260334000 | 3.173339000  | -1.653904000 |
| 1  | -2.792466000 | 5.120513000  | -1.665036000 |
| 1  | -4.461678000 | 5.396366000  | 0.144170000  |
| 1  | -4.589042000 | 3.728792000  | 1.972683000  |
| 1  | -3.037867000 | 1.797246000  | 1.995916000  |
| 6  | -2.143002000 | -2.282529000 | 0.146057000  |
| 6  | -2.818745000 | -2.515755000 | -1.046718000 |
| 6  | -3.706028000 | -3.581696000 | -1.137582000 |
| 6  | -3.899848000 | -4.417651000 | -0.044948000 |
| 6  | -3.208861000 | -4.185032000 | 1.139644000  |
| 6  | -2.327522000 | -3.116833000 | 1.242485000  |
| 1  | -2.646597000 | -1.867274000 | -1.900540000 |
| 1  | -4.240295000 | -3.760526000 | -2.064362000 |
| 1  | -4.588617000 | -5.252398000 | -0.116195000 |
| 1  | -3.358996000 | -4.837478000 | 1.992921000  |
| 1  | -1.785034000 | -2.930664000 | 2.160767000  |
| 8  | 0.470227000  | -2.540011000 | 0.807278000  |
| 26 | 1.534102000  | -0.027508000 | -0.031607000 |
| 6  | 2.787372000  | -1.418728000 | -0.288962000 |
| 6  | 1.950247000  | 0.078762000  | 1.783829000  |
| 6  | 2.828006000  | 1.286961000  | -0.444222000 |
| 6  | 0.978763000  | -0.123599000 | -1.801603000 |
| 7  | 3.608328000  | 2.114396000  | -0.679403000 |
| 7  | 3.539498000  | -2.291721000 | -0.433594000 |
| 7  | 2.190765000  | 0.150932000  | 2.918418000  |
| 7  | 0.629830000  | -0.185784000 | -2.911484000 |
| 6  | 0.250133000  | -0.280597000 | -4.270255000 |
| 1  | -0.014919000 | -1.312730000 | -4.508135000 |
| 1  | -0.609151000 | 0.365174000  | -4.461714000 |
| 1  | 1.080034000  | 0.032013000  | -4.907098000 |
| 6  | 4.482465000  | 3.201098000  | -0.910638000 |
| 1  | 4.693949000  | 3.284882000  | -1.978095000 |

|   |              |              |              |
|---|--------------|--------------|--------------|
| 1 | 4.012018000  | 4.121832000  | -0.560335000 |
| 1 | 5.418070000  | 3.043337000  | -0.371211000 |
| 6 | 2.465433000  | 0.249598000  | 4.301431000  |
| 1 | 2.109113000  | -0.647454000 | 4.811178000  |
| 1 | 3.541295000  | 0.348442000  | 4.457210000  |
| 1 | 1.960581000  | 1.125536000  | 4.713065000  |
| 6 | 4.376668000  | -3.424319000 | -0.555394000 |
| 1 | 5.295727000  | -3.266459000 | 0.011718000  |
| 1 | 3.855194000  | -4.300562000 | -0.165578000 |
| 1 | 4.626511000  | -3.587949000 | -1.605167000 |
| 1 | -2.871521000 | 0.046837000  | 0.029014000  |

**[6b-H]<sup>+</sup>**, TE = - 5778.262690

|   |              |              |              |
|---|--------------|--------------|--------------|
| 6 | 0.120155000  | 1.512699000  | 0.247121000  |
| 7 | -1.370911000 | 1.218876000  | 0.134921000  |
| 6 | -1.927935000 | 0.020657000  | 0.126262000  |
| 7 | -1.386304000 | -1.175988000 | 0.249050000  |
| 6 | 0.103679000  | -1.469771000 | 0.457164000  |
| 8 | 0.340989000  | 2.672175000  | 0.460918000  |
| 6 | -2.278725000 | 2.336793000  | 0.127873000  |
| 6 | -2.235351000 | 3.245306000  | -0.923011000 |
| 6 | -3.122051000 | 4.312233000  | -0.937625000 |
| 6 | -4.045952000 | 4.471359000  | 0.090654000  |
| 6 | -4.077558000 | 3.564184000  | 1.141608000  |
| 6 | -3.185784000 | 2.497416000  | 1.167815000  |
| 1 | -1.509395000 | 3.117471000  | -1.717825000 |
| 1 | -3.093418000 | 5.022629000  | -1.756675000 |
| 1 | -4.737777000 | 5.306396000  | 0.073916000  |
| 1 | -4.789515000 | 3.688707000  | 1.950175000  |
| 1 | -3.186790000 | 1.799455000  | 1.999480000  |
| 6 | -2.295693000 | -2.289125000 | 0.165315000  |
| 6 | -2.950765000 | -2.536757000 | -1.035772000 |
| 6 | -3.847555000 | -3.594942000 | -1.124577000 |
| 6 | -4.071521000 | -4.408610000 | -0.021022000 |
| 6 | -3.400965000 | -4.161650000 | 1.172358000  |

|    |              |              |              |
|----|--------------|--------------|--------------|
| 6  | -2.510140000 | -3.101178000 | 1.272750000  |
| 1  | -2.755170000 | -1.905412000 | -1.897289000 |
| 1  | -4.365765000 | -3.785075000 | -2.058174000 |
| 1  | -4.767835000 | -5.237212000 | -0.090459000 |
| 1  | -3.574367000 | -4.796896000 | 2.034145000  |
| 1  | -1.982852000 | -2.904279000 | 2.197728000  |
| 8  | 0.299964000  | -2.588321000 | 0.839337000  |
| 6  | 2.812841000  | -1.505326000 | -0.237212000 |
| 6  | 1.910677000  | 0.132615000  | 1.912338000  |
| 6  | 2.826909000  | 1.417598000  | -0.451179000 |
| 6  | 0.952044000  | -0.156225000 | -1.922799000 |
| 7  | 3.567547000  | 2.283999000  | -0.676799000 |
| 7  | 3.545027000  | -2.401533000 | -0.341097000 |
| 7  | 2.148667000  | 0.223822000  | 3.045733000  |
| 7  | 0.638846000  | -0.242832000 | -3.041077000 |
| 6  | 0.301347000  | -0.364608000 | -4.408659000 |
| 1  | 0.038651000  | -1.400487000 | -4.632159000 |
| 1  | -0.548499000 | 0.280713000  | -4.639396000 |
| 1  | 1.152657000  | -0.069023000 | -5.025005000 |
| 6  | 4.396607000  | 3.405035000  | -0.909132000 |
| 1  | 4.615123000  | 3.487272000  | -1.975342000 |
| 1  | 3.883874000  | 4.308444000  | -0.573319000 |
| 1  | 5.332547000  | 3.292409000  | -0.359008000 |
| 6  | 2.425143000  | 0.343625000  | 4.426781000  |
| 1  | 2.079024000  | -0.550540000 | 4.948391000  |
| 1  | 3.500362000  | 0.455774000  | 4.577734000  |
| 1  | 1.911539000  | 1.219508000  | 4.827409000  |
| 6  | 4.364640000  | -3.550044000 | -0.425441000 |
| 1  | 5.268952000  | -3.402267000 | 0.167581000  |
| 1  | 3.816488000  | -4.413397000 | -0.043499000 |
| 1  | 4.643017000  | -3.728465000 | -1.465641000 |
| 44 | 1.483257000  | -0.014562000 | -0.022171000 |
| 1  | -3.011168000 | 0.022901000  | 0.024949000  |

Cartesian coordinates for the singlet state optimized geometries of **1a-6b**, along with their total energies (in hartrees) including zero point in aqueous phase.

**1a**, TE = - 1869.452223

|    |              |              |              |
|----|--------------|--------------|--------------|
| 6  | 2.166336000  | 1.060489000  | -0.000028000 |
| 6  | 1.218843000  | -1.121825000 | 0.000115000  |
| 1  | 1.416795000  | -2.197346000 | 0.000197000  |
| 7  | 2.295491000  | -0.386036000 | 0.000081000  |
| 7  | 0.907752000  | 1.346644000  | -0.000081000 |
| 6  | 3.653031000  | -0.918738000 | 0.000155000  |
| 1  | 4.180684000  | -0.563520000 | 0.886544000  |
| 1  | 3.618240000  | -2.007523000 | 0.000177000  |
| 1  | 4.180763000  | -0.563558000 | -0.886203000 |
| 6  | 0.532775000  | 2.748444000  | -0.000191000 |
| 1  | -0.072386000 | 2.974152000  | -0.883979000 |
| 1  | -0.072452000 | 2.974271000  | 0.883522000  |
| 1  | 1.422743000  | 3.382565000  | -0.000200000 |
| 25 | -0.492898000 | -0.162025000 | 0.000000000  |
| 6  | -0.398939000 | -0.146966000 | -1.840775000 |
| 8  | -0.321719000 | -0.145161000 | -2.977039000 |
| 6  | -1.463044000 | -1.679428000 | 0.000109000  |
| 8  | -2.047784000 | -2.664155000 | 0.000180000  |
| 6  | -1.973659000 | 0.923167000  | -0.000134000 |
| 8  | -2.907700000 | 1.580997000  | -0.000217000 |
| 6  | -0.399028000 | -0.146645000 | 1.840779000  |
| 8  | -0.321861000 | -0.144638000 | 2.977045000  |

**1b**, TE = - 2003.238043

|    |              |              |              |
|----|--------------|--------------|--------------|
| 6  | 0.548635000  | -2.376203000 | -0.096321000 |
| 6  | 1.259338000  | -0.092106000 | 0.111686000  |
| 7  | 1.574591000  | -1.412786000 | 0.070180000  |
| 7  | -0.613452000 | -1.812785000 | -0.154332000 |
| 25 | -0.767137000 | 0.218845000  | 0.013727000  |
| 6  | -0.812419000 | 0.000490000  | 1.841305000  |
| 8  | -0.806857000 | -0.142903000 | 2.972432000  |
| 6  | -0.877897000 | 2.012494000  | 0.134000000  |

|   |              |              |              |
|---|--------------|--------------|--------------|
| 8 | -1.049256000 | 3.146554000  | 0.187879000  |
| 6 | -2.576774000 | 0.179192000  | -0.159600000 |
| 8 | -3.716110000 | 0.182685000  | -0.266312000 |
| 6 | -0.481561000 | 0.301855000  | -1.803492000 |
| 8 | -0.278270000 | 0.350482000  | -2.924191000 |
| 6 | -1.772053000 | -2.669803000 | -0.314621000 |
| 6 | 2.875610000  | -1.962693000 | 0.454556000  |
| 7 | 2.255210000  | 0.797669000  | 0.068687000  |
| 6 | 3.515479000  | 0.593159000  | -0.645114000 |
| 1 | 4.365425000  | 0.475234000  | 0.032040000  |
| 1 | 3.447414000  | -0.265862000 | -1.307358000 |
| 1 | 3.687458000  | 1.479182000  | -1.261978000 |
| 6 | 2.069661000  | 2.175997000  | 0.490859000  |
| 1 | 3.013919000  | 2.532343000  | 0.909279000  |
| 1 | 1.799772000  | 2.821972000  | -0.351489000 |
| 1 | 1.315707000  | 2.236877000  | 1.270103000  |
| 1 | 3.390262000  | -1.272540000 | 1.122797000  |
| 1 | 2.684240000  | -2.893482000 | 0.985647000  |
| 1 | 3.515002000  | -2.182676000 | -0.403319000 |
| 1 | -1.461576000 | -3.716878000 | -0.363656000 |
| 1 | -2.462411000 | -2.541830000 | 0.526599000  |
| 1 | -2.315416000 | -2.416986000 | -1.231592000 |

**1c**, TE = - 1983.870765

|    |              |              |              |
|----|--------------|--------------|--------------|
| 6  | 1.151849000  | -2.188188000 | -0.000236000 |
| 6  | 1.423123000  | 0.179983000  | 0.000125000  |
| 7  | 1.982851000  | -1.032935000 | 0.000056000  |
| 7  | -0.092221000 | -1.835695000 | -0.000330000 |
| 25 | -0.591794000 | 0.154950000  | 0.000004000  |
| 6  | -0.500926000 | 0.098273000  | 1.841928000  |
| 8  | -0.428404000 | 0.056788000  | 2.977519000  |
| 6  | -0.969697000 | 1.919352000  | 0.000424000  |
| 8  | -1.296582000 | 3.018351000  | 0.000704000  |
| 6  | -2.385044000 | -0.191452000 | -0.000275000 |
| 8  | -3.511484000 | -0.380534000 | -0.000464000 |

|   |              |              |              |
|---|--------------|--------------|--------------|
| 6 | -0.500584000 | 0.099175000  | -1.841923000 |
| 8 | -0.427853000 | 0.058270000  | -2.977524000 |
| 6 | -1.091540000 | -2.887142000 | -0.000587000 |
| 8 | 2.336085000  | 1.123126000  | 0.000150000  |
| 6 | 1.970287000  | 2.504441000  | 0.000318000  |
| 1 | 1.402977000  | 2.746199000  | -0.898567000 |
| 1 | 1.403034000  | 2.746004000  | 0.899291000  |
| 1 | 2.910645000  | 3.052114000  | 0.000348000  |
| 6 | 3.430733000  | -1.212741000 | 0.000106000  |
| 1 | 3.875387000  | -0.757534000 | -0.887195000 |
| 1 | 3.875446000  | -0.756322000 | 0.886741000  |
| 1 | 3.620562000  | -2.283321000 | 0.000805000  |
| 1 | -0.606743000 | -3.866720000 | -0.000667000 |
| 1 | -1.732183000 | -2.806106000 | 0.884040000  |
| 1 | -1.731993000 | -2.805858000 | -0.885328000 |

**1'a**, TE = - 2252.459654

|    |              |              |              |
|----|--------------|--------------|--------------|
| 6  | -0.632528000 | -1.256352000 | 0.027156000  |
| 6  | -1.216668000 | 1.057806000  | 0.030081000  |
| 1  | -2.035168000 | 1.781565000  | 0.060885000  |
| 7  | -1.620925000 | -0.192203000 | 0.030088000  |
| 7  | 0.540238000  | -0.702245000 | 0.049580000  |
| 25 | 0.708759000  | 1.363191000  | 0.012123000  |
| 6  | 0.654436000  | 1.246254000  | -1.831298000 |
| 8  | 0.602261000  | 1.174322000  | -2.965509000 |
| 6  | 0.520414000  | 3.153857000  | -0.048771000 |
| 8  | 0.362522000  | 4.286356000  | -0.087483000 |
| 6  | 2.550278000  | 1.451391000  | -0.006726000 |
| 8  | 3.687066000  | 1.541102000  | -0.029653000 |
| 6  | 0.650582000  | 1.381684000  | 1.858025000  |
| 8  | 0.589538000  | 1.403145000  | 2.994365000  |
| 6  | 1.660910000  | -1.577875000 | -0.008518000 |
| 6  | 2.610812000  | -1.563300000 | 1.011862000  |
| 6  | 1.824253000  | -2.445147000 | -1.088171000 |
| 6  | 3.705058000  | -2.418452000 | 0.958729000  |

|   |              |              |              |
|---|--------------|--------------|--------------|
| 1 | 2.483445000  | -0.893944000 | 1.856186000  |
| 6 | 2.926104000  | -3.292338000 | -1.141536000 |
| 1 | 1.083717000  | -2.444310000 | -1.880541000 |
| 6 | 3.869452000  | -3.283922000 | -0.119101000 |
| 1 | 4.431461000  | -2.408282000 | 1.764950000  |
| 1 | 3.046017000  | -3.961236000 | -1.987886000 |
| 1 | 4.728441000  | -3.945284000 | -0.162337000 |
| 6 | -3.006595000 | -0.562264000 | 0.035012000  |
| 6 | -3.445323000 | -1.555011000 | 0.905481000  |
| 6 | -3.896861000 | 0.077086000  | -0.821199000 |
| 6 | -4.792309000 | -1.893973000 | 0.928451000  |
| 1 | -2.733315000 | -2.047803000 | 1.556669000  |
| 6 | -5.243338000 | -0.268427000 | -0.789702000 |
| 1 | -3.538893000 | 0.824676000  | -1.521437000 |
| 6 | -5.693871000 | -1.251845000 | 0.084294000  |
| 1 | -5.138144000 | -2.662255000 | 1.611815000  |
| 1 | -5.937455000 | 0.226097000  | -1.460703000 |
| 1 | -6.744212000 | -1.522303000 | 0.103480000  |

**1'b**, TE = - 2386.249913

|    |              |              |              |
|----|--------------|--------------|--------------|
| 6  | 0.265210000  | -1.424910000 | -0.313727000 |
| 6  | 1.101517000  | 0.836021000  | -0.191671000 |
| 7  | 1.345564000  | -0.517366000 | -0.281454000 |
| 7  | -0.868832000 | -0.799251000 | -0.199673000 |
| 25 | -0.878590000 | 1.229172000  | 0.160813000  |
| 6  | -0.551087000 | 0.845513000  | 1.935536000  |
| 8  | -0.317730000 | 0.612587000  | 3.025920000  |
| 6  | -0.871471000 | 2.998441000  | 0.488833000  |
| 8  | -0.971702000 | 4.121048000  | 0.704763000  |
| 6  | -2.686568000 | 1.268182000  | 0.402879000  |
| 8  | -3.813734000 | 1.335802000  | 0.578257000  |
| 6  | -0.981676000 | 1.516271000  | -1.658416000 |
| 8  | -1.010060000 | 1.703342000  | -2.782113000 |
| 6  | -2.040991000 | -1.601595000 | -0.176483000 |
| 6  | -3.027320000 | -1.434765000 | -1.148953000 |

|   |              |              |              |
|---|--------------|--------------|--------------|
| 6 | -2.226083000 | -2.556828000 | 0.823843000  |
| 6 | -4.174586000 | -2.219795000 | -1.127667000 |
| 1 | -2.887850000 | -0.695648000 | -1.931416000 |
| 6 | -3.377489000 | -3.336709000 | 0.845853000  |
| 1 | -1.458376000 | -2.679119000 | 1.580419000  |
| 6 | -4.356445000 | -3.172820000 | -0.129478000 |
| 1 | -4.928452000 | -2.086891000 | -1.897251000 |
| 1 | -3.509316000 | -4.075013000 | 1.630779000  |
| 1 | -5.254620000 | -3.781320000 | -0.111353000 |
| 6 | 2.631879000  | -1.124651000 | -0.086455000 |
| 6 | 3.074237000  | -2.120942000 | -0.952822000 |
| 6 | 3.404216000  | -0.766376000 | 1.015027000  |
| 6 | 4.294130000  | -2.744656000 | -0.723676000 |
| 1 | 2.456671000  | -2.401159000 | -1.798317000 |
| 6 | 4.628046000  | -1.390229000 | 1.235144000  |
| 1 | 3.047218000  | -0.006448000 | 1.702579000  |
| 6 | 5.077671000  | -2.379892000 | 0.368228000  |
| 1 | 4.634546000  | -3.518699000 | -1.403788000 |
| 1 | 5.224412000  | -1.106194000 | 2.095999000  |
| 1 | 6.030325000  | -2.868223000 | 0.544051000  |
| 7 | 2.090642000  | 1.669020000  | -0.487715000 |
| 6 | 3.251334000  | 1.340552000  | -1.315850000 |
| 1 | 4.151471000  | 1.193755000  | -0.713357000 |
| 1 | 3.062163000  | 0.450259000  | -1.909414000 |
| 1 | 3.410709000  | 2.182322000  | -1.993384000 |
| 6 | 2.032044000  | 3.082659000  | -0.140471000 |
| 1 | 3.055225000  | 3.445068000  | -0.028412000 |
| 1 | 1.541801000  | 3.665466000  | -0.926582000 |
| 1 | 1.523626000  | 3.222669000  | 0.808372000  |

**1'c**, TE = - 2366.877570

|   |              |              |              |
|---|--------------|--------------|--------------|
| 6 | -0.410542000 | -1.433474000 | 0.063435000  |
| 6 | -1.179180000 | 0.836474000  | -0.013584000 |
| 7 | -1.460909000 | -0.479946000 | 0.029305000  |
| 7 | 0.734715000  | -0.818788000 | 0.081759000  |



|    |              |              |              |
|----|--------------|--------------|--------------|
| 25 | 0.789387000  | 1.241989000  | -0.038828000 |
| 6  | 0.719443000  | 1.051771000  | -1.876711000 |
| 8  | 0.662312000  | 0.934851000  | -3.006941000 |
| 6  | 0.770056000  | 3.040305000  | -0.176274000 |
| 8  | 0.847805000  | 4.179817000  | -0.265986000 |
| 6  | 2.621076000  | 1.301120000  | -0.058334000 |
| 8  | 3.758717000  | 1.378185000  | -0.085351000 |
| 6  | 0.713055000  | 1.330960000  | 1.804475000  |
| 8  | 0.645277000  | 1.392076000  | 2.939075000  |
| 6  | 1.901554000  | -1.632094000 | 0.074092000  |
| 6  | 2.777941000  | -1.611453000 | 1.158598000  |
| 6  | 2.187074000  | -2.445572000 | -1.021993000 |
| 6  | 3.920252000  | -2.403512000 | 1.149911000  |
| 1  | 2.556107000  | -0.984168000 | 2.015980000  |
| 6  | 3.333991000  | -3.232685000 | -1.029437000 |
| 1  | 1.502847000  | -2.453795000 | -1.863773000 |
| 6  | 4.205196000  | -3.214697000 | 0.055079000  |
| 1  | 4.588993000  | -2.387761000 | 2.004621000  |
| 1  | 3.546066000  | -3.861967000 | -1.888095000 |
| 1  | 5.099921000  | -3.828411000 | 0.048119000  |
| 6  | -2.812888000 | -0.975288000 | 0.054158000  |
| 6  | -3.431636000 | -1.215259000 | 1.274539000  |
| 6  | -3.473060000 | -1.231056000 | -1.141010000 |
| 6  | -4.727575000 | -1.719228000 | 1.297181000  |
| 1  | -2.897703000 | -1.012032000 | 2.196779000  |
| 6  | -4.768995000 | -1.734655000 | -1.112028000 |
| 1  | -2.971646000 | -1.040837000 | -2.084034000 |
| 6  | -5.397145000 | -1.979103000 | 0.105372000  |
| 1  | -5.212830000 | -1.910936000 | 2.248421000  |
| 1  | -5.286760000 | -1.938956000 | -2.043293000 |
| 1  | -6.407625000 | -2.373655000 | 0.125261000  |
| 8  | -2.269061000 | 1.555991000  | -0.026819000 |
| 6  | -2.219717000 | 2.985333000  | -0.068340000 |
| 1  | -1.687794000 | 3.371225000  | 0.801006000  |
| 1  | -1.756416000 | 3.319856000  | -0.996344000 |

1 -3.258286000 3.308175000 -0.037975000

**2a**, TE = - 1908.119697

6 -2.620328000 -1.137566000 0.000054000  
6 -1.636474000 1.026565000 0.000011000  
1 -1.836815000 2.104649000 0.000004000  
7 -2.734355000 0.305046000 0.000041000  
7 -1.361550000 -1.434378000 0.000031000  
6 -4.081164000 0.858895000 0.000065000  
1 -4.621372000 0.518657000 0.885821000  
1 -4.027869000 1.947626000 0.000041000  
1 -4.621419000 0.518619000 -0.885648000  
6 -1.008421000 -2.839147000 0.000041000  
1 -0.402470000 -3.074585000 -0.881404000  
1 -0.402437000 -3.074565000 0.881468000  
1 -1.904938000 -3.466582000 0.000065000  
6 0.048323000 0.093833000 -1.826225000  
8 0.053840000 0.136555000 -2.972992000  
6 0.048407000 0.093892000 1.826197000  
8 0.053878000 0.136614000 2.972964000  
6 1.554856000 -1.094300000 -0.000022000  
7 2.481236000 -1.805896000 -0.000104000  
6 1.060965000 1.635188000 -0.000060000  
7 1.654145000 2.644132000 -0.000012000  
6 2.389090000 3.850986000 0.000083000  
1 3.023273000 3.899759000 -0.887383000  
1 1.706525000 4.703195000 -0.003005000  
1 3.018600000 3.902466000 0.890716000  
6 3.591417000 -2.680233000 -0.000076000  
1 4.199797000 -2.504995000 -0.889282000  
1 4.199449000 -2.505392000 0.889445000  
1 3.246965000 -3.716332000 -0.000374000  
25 0.048184000 0.070045000 -0.000014000

**2b**, TE = - 2041.901627

6 -1.291909000 -2.481656000 0.008078000  
6 -1.621721000 -0.100295000 0.082946000  
7 -2.155005000 -1.353263000 0.077803000  
7 -0.054560000 -2.107400000 -0.034795000  
6 0.218855000 0.008327000 -1.765240000  
8 0.074272000 0.120644000 -2.900021000  
6 0.427795000 -0.170442000 1.865859000  
8 0.407991000 -0.175099000 3.015173000  
6 2.257631000 -0.471906000 -0.098585000  
7 3.406204000 -0.670442000 -0.190618000  
6 0.827610000 1.702227000 0.095737000

|    |              |              |              |
|----|--------------|--------------|--------------|
| 7  | 1.189607000  | 2.817252000  | 0.113483000  |
| 6  | 1.538984000  | 4.184882000  | 0.148193000  |
| 1  | 0.639744000  | 4.798761000  | 0.242348000  |
| 1  | 2.193490000  | 4.381472000  | 1.000011000  |
| 1  | 2.062040000  | 4.460512000  | -0.769962000 |
| 6  | 4.783970000  | -0.960979000 | -0.305351000 |
| 1  | 5.197674000  | -0.460028000 | -1.182741000 |
| 1  | 5.312195000  | -0.614732000 | 0.585118000  |
| 1  | 4.927584000  | -2.038673000 | -0.408816000 |
| 25 | 0.408456000  | -0.113977000 | 0.042634000  |
| 6  | 0.948959000  | -3.149062000 | -0.094587000 |
| 6  | -3.539260000 | -1.662343000 | 0.430842000  |
| 7  | -2.482925000 | 0.928118000  | -0.026181000 |
| 6  | -2.105080000 | 2.276978000  | 0.352103000  |
| 1  | -1.345730000 | 2.253041000  | 1.128008000  |
| 1  | -1.736688000 | 2.851246000  | -0.506164000 |
| 1  | -2.990147000 | 2.781881000  | 0.749687000  |
| 6  | -3.711182000 | 0.890829000  | -0.815459000 |
| 1  | -3.732577000 | 0.008893000  | -1.451385000 |
| 1  | -4.613781000 | 0.920304000  | -0.197748000 |
| 1  | -3.713779000 | 1.770615000  | -1.465766000 |
| 1  | -3.526880000 | -2.595296000 | 0.992498000  |
| 1  | -3.950847000 | -0.873266000 | 1.061500000  |
| 1  | -4.187139000 | -1.798567000 | -0.439198000 |
| 1  | 1.631238000  | -3.073158000 | 0.759921000  |
| 1  | 0.476977000  | -4.136895000 | -0.087642000 |
| 1  | 1.555958000  | -3.050262000 | -1.001792000 |

2c, TE = - 2022.538278

|   |              |              |              |
|---|--------------|--------------|--------------|
| 6 | 1.874362000  | -2.163830000 | -0.000101000 |
| 6 | 1.769531000  | 0.220579000  | -0.000075000 |
| 7 | 2.518253000  | -0.892370000 | -0.000126000 |
| 7 | 0.590667000  | -1.998416000 | 0.000143000  |
| 6 | -0.156876000 | -0.059907000 | 1.825949000  |
| 8 | -0.125562000 | -0.004583000 | 2.971975000  |
| 6 | -0.157018000 | -0.060012000 | -1.825503000 |
| 8 | -0.125891000 | -0.004892000 | -2.971541000 |
| 6 | -1.972902000 | -0.757795000 | 0.000138000  |
| 7 | -3.073625000 | -1.147117000 | 0.000162000  |
| 6 | -0.877143000 | 1.641558000  | 0.000225000  |
| 7 | -1.390303000 | 2.694178000  | 0.000304000  |
| 6 | -1.948394000 | 3.991688000  | 0.000205000  |
| 1 | -1.152614000 | 4.740206000  | -0.009974000 |
| 1 | -2.575533000 | 4.126902000  | -0.883314000 |
| 1 | -2.559365000 | 4.133933000  | 0.893889000  |
| 6 | -4.390185000 | -1.660606000 | -0.001036000 |

|    |              |              |              |
|----|--------------|--------------|--------------|
| 1  | -4.851024000 | -1.498614000 | 0.975068000  |
| 1  | -4.983650000 | -1.155811000 | -0.765499000 |
| 1  | -4.368091000 | -2.731376000 | -0.213677000 |
| 25 | -0.195134000 | -0.097732000 | 0.000207000  |
| 6  | -0.228960000 | -3.191807000 | 0.000410000  |
| 6  | 3.974176000  | -0.848532000 | -0.000356000 |
| 8  | 2.550142000  | 1.290072000  | -0.000362000 |
| 6  | 1.981920000  | 2.597246000  | -0.000532000 |
| 1  | 1.377880000  | 2.751987000  | -0.894897000 |
| 1  | 1.378390000  | 2.752461000  | 0.894091000  |
| 1  | 2.828701000  | 3.282258000  | -0.000957000 |
| 1  | 4.326360000  | -1.877839000 | -0.000209000 |
| 1  | 4.349720000  | -0.331378000 | -0.886560000 |
| 1  | 4.349978000  | -0.331032000 | 0.885533000  |
| 1  | -0.879768000 | -3.210083000 | -0.880909000 |
| 1  | 0.399836000  | -4.087530000 | -0.000645000 |
| 1  | -0.877983000 | -3.210971000 | 0.882987000  |

2'a, TE = - 2291.620781

|    |              |              |              |
|----|--------------|--------------|--------------|
| 6  | 0.992633000  | -1.308750000 | -0.110253000 |
| 6  | 1.298837000  | 0.960725000  | 0.016793000  |
| 1  | 2.044655000  | 1.757817000  | 0.072696000  |
| 7  | 1.880907000  | -0.246284000 | -0.048787000 |
| 7  | -0.251391000 | -1.011302000 | -0.105596000 |
| 6  | -0.640563000 | 0.962922000  | 1.874487000  |
| 8  | -0.664396000 | 0.977769000  | 3.014886000  |
| 6  | -0.669715000 | 1.266858000  | -1.794105000 |
| 8  | -0.706695000 | 1.476772000  | -2.915247000 |
| 6  | -2.527724000 | 0.856984000  | 0.052676000  |
| 7  | -3.686169000 | 0.763923000  | 0.075772000  |
| 6  | -0.608666000 | 2.891395000  | 0.184531000  |
| 7  | -0.565977000 | 4.051023000  | 0.282285000  |
| 6  | -0.527316000 | 5.459618000  | 0.404420000  |
| 1  | -0.017718000 | 5.732406000  | 1.329854000  |
| 1  | 0.011110000  | 5.885848000  | -0.443460000 |
| 1  | -1.544612000 | 5.853940000  | 0.422104000  |
| 6  | -5.092068000 | 0.612603000  | 0.092431000  |
| 1  | -5.450147000 | 0.654600000  | 1.121976000  |
| 1  | -5.552564000 | 1.415128000  | -0.485482000 |
| 1  | -5.357404000 | -0.351084000 | -0.345864000 |
| 25 | -0.604703000 | 1.019547000  | 0.031330000  |
| 6  | -1.186337000 | -2.082963000 | -0.120402000 |
| 6  | -2.169487000 | -2.124884000 | -1.107278000 |
| 6  | -1.127896000 | -3.077015000 | 0.855158000  |
| 6  | -3.076965000 | -3.175617000 | -1.127296000 |
| 1  | -2.208230000 | -1.347923000 | -1.862225000 |

|   |              |              |              |
|---|--------------|--------------|--------------|
| 6 | -2.047385000 | -4.120029000 | 0.832759000  |
| 1 | -0.379081000 | -3.019875000 | 1.638477000  |
| 6 | -3.021020000 | -4.173989000 | -0.157916000 |
| 1 | -3.831833000 | -3.213904000 | -1.905579000 |
| 1 | -2.002040000 | -4.888548000 | 1.597107000  |
| 1 | -3.737927000 | -4.987893000 | -0.173402000 |
| 6 | 3.297918000  | -0.481962000 | -0.065094000 |
| 6 | 3.853749000  | -1.392032000 | 0.827241000  |
| 6 | 4.089926000  | 0.214804000  | -0.970235000 |
| 6 | 5.226968000  | -1.605717000 | 0.807433000  |
| 1 | 3.226311000  | -1.914582000 | 1.541474000  |
| 6 | 5.462932000  | 0.001689000  | -0.972347000 |
| 1 | 3.634979000  | 0.904775000  | -1.672625000 |
| 6 | 6.031968000  | -0.908830000 | -0.087700000 |
| 1 | 5.667338000  | -2.311817000 | 1.502822000  |
| 1 | 6.086128000  | 0.541121000  | -1.677105000 |
| 1 | 7.103487000  | -1.076428000 | -0.096677000 |
| 1 | 1.393514000  | -2.314974000 | -0.181979000 |

**2'b**, TE = - 2424.916008

|    |              |              |              |
|----|--------------|--------------|--------------|
| 6  | -0.762965000 | -1.627799000 | -0.182435000 |
| 6  | -1.244580000 | 0.745068000  | -0.152541000 |
| 7  | -1.694804000 | -0.558204000 | -0.206726000 |
| 7  | 0.446880000  | -1.171767000 | -0.039681000 |
| 6  | 0.788912000  | 0.921588000  | -1.791785000 |
| 8  | 0.777569000  | 1.002677000  | -2.936974000 |
| 6  | 0.597286000  | 0.910098000  | 1.850566000  |
| 8  | 0.454158000  | 0.984564000  | 2.988022000  |
| 6  | 2.647328000  | 0.630818000  | 0.096576000  |
| 7  | 3.808990000  | 0.510546000  | 0.120761000  |
| 6  | 1.075213000  | 2.704624000  | 0.031590000  |
| 7  | 1.370471000  | 3.838184000  | 0.020913000  |
| 6  | 1.651270000  | 5.222212000  | 0.009584000  |
| 1  | 0.719421000  | 5.791951000  | -0.021427000 |
| 1  | 2.206464000  | 5.496922000  | 0.908815000  |
| 1  | 2.250988000  | 5.473506000  | -0.867626000 |
| 6  | 5.193608000  | 0.235590000  | 0.172815000  |
| 1  | 5.654793000  | 0.465965000  | -0.789395000 |
| 1  | 5.664495000  | 0.842460000  | 0.948423000  |
| 1  | 5.345644000  | -0.822054000 | 0.400862000  |
| 25 | 0.771601000  | 0.865269000  | 0.032743000  |
| 6  | 1.483932000  | -2.135836000 | -0.021225000 |
| 6  | 2.277527000  | -2.293836000 | 1.117168000  |
| 6  | 1.743079000  | -2.931238000 | -1.138817000 |
| 6  | 3.300842000  | -3.233963000 | 1.139748000  |
| 1  | 2.080628000  | -1.676393000 | 1.987655000  |

|   |              |              |              |
|---|--------------|--------------|--------------|
| 6 | 2.771990000  | -3.868550000 | -1.116563000 |
| 1 | 1.129587000  | -2.803965000 | -2.024704000 |
| 6 | 3.556311000  | -4.025130000 | 0.021623000  |
| 1 | 3.900253000  | -3.352049000 | 2.037461000  |
| 1 | 2.960113000  | -4.478636000 | -1.995005000 |
| 1 | 4.358752000  | -4.755519000 | 0.038783000  |
| 6 | -3.049216000 | -0.964182000 | 0.031347000  |
| 6 | -3.661754000 | -1.887235000 | -0.813413000 |
| 6 | -3.732493000 | -0.491271000 | 1.149228000  |
| 6 | -4.954893000 | -2.320560000 | -0.549080000 |
| 1 | -3.116272000 | -2.260003000 | -1.672806000 |
| 6 | -5.029574000 | -0.923980000 | 1.406594000  |
| 1 | -3.247846000 | 0.213089000  | 1.817371000  |
| 6 | -5.646273000 | -1.838474000 | 0.559627000  |
| 1 | -5.425488000 | -3.037445000 | -1.214375000 |
| 1 | -5.553973000 | -0.549713000 | 2.279932000  |
| 1 | -6.656589000 | -2.177313000 | 0.763606000  |
| 7 | -2.138437000 | 1.707442000  | -0.396785000 |
| 6 | -1.886286000 | 3.089747000  | -0.026843000 |
| 1 | -1.176410000 | 3.136929000  | 0.792316000  |
| 1 | -1.512676000 | 3.670856000  | -0.876890000 |
| 1 | -2.830418000 | 3.530434000  | 0.305088000  |
| 6 | -3.360133000 | 1.559146000  | -1.183314000 |
| 1 | -3.322651000 | 0.659472000  | -1.792522000 |
| 1 | -4.255541000 | 1.533357000  | -0.555495000 |
| 1 | -3.423610000 | 2.424056000  | -1.849104000 |

2'c, TE = - 240505.5478

|   |              |              |              |
|---|--------------|--------------|--------------|
| 6 | -0.877502000 | -1.619040000 | 0.014831000  |
| 6 | -1.313217000 | 0.741726000  | 0.056770000  |
| 7 | -1.785273000 | -0.527865000 | 0.016845000  |
| 7 | 0.341039000  | -1.162622000 | 0.063704000  |
| 6 | 0.580792000  | 0.858278000  | -1.813068000 |
| 8 | 0.520191000  | 0.876229000  | -2.957593000 |
| 6 | 0.672289000  | 1.002974000  | 1.840321000  |
| 8 | 0.665580000  | 1.117864000  | 2.981662000  |
| 6 | 2.548200000  | 0.669371000  | -0.044012000 |
| 7 | 3.707650000  | 0.553161000  | -0.093803000 |
| 6 | 0.907801000  | 2.736991000  | -0.070196000 |
| 7 | 1.155588000  | 3.878818000  | -0.130462000 |
| 6 | 1.392208000  | 5.269846000  | -0.200103000 |
| 1 | 0.442156000  | 5.809187000  | -0.199227000 |
| 1 | 1.984628000  | 5.588818000  | 0.659697000  |
| 1 | 1.936988000  | 5.508097000  | -1.115752000 |
| 6 | 5.097378000  | 0.300586000  | -0.129859000 |
| 1 | 5.476972000  | 0.465125000  | -1.139765000 |

|    |              |              |              |
|----|--------------|--------------|--------------|
| 1  | 5.613635000  | 0.969551000  | 0.560840000  |
| 1  | 5.284396000  | -0.735369000 | 0.161833000  |
| 25 | 0.661157000  | 0.886582000  | 0.015571000  |
| 6  | 1.377938000  | -2.127591000 | 0.034538000  |
| 6  | 2.275098000  | -2.227735000 | 1.099943000  |
| 6  | 1.530371000  | -2.980141000 | -1.060003000 |
| 6  | 3.296549000  | -3.169936000 | 1.074847000  |
| 1  | 2.161354000  | -1.565631000 | 1.952175000  |
| 6  | 2.557814000  | -3.918560000 | -1.085933000 |
| 1  | 0.836133000  | -2.895170000 | -1.889436000 |
| 6  | 3.445683000  | -4.018864000 | -0.019608000 |
| 1  | 3.978269000  | -3.243358000 | 1.916746000  |
| 1  | 2.663653000  | -4.573511000 | -1.945515000 |
| 1  | 4.247071000  | -4.750250000 | -0.040237000 |
| 6  | -3.188681000 | -0.832438000 | 0.017339000  |
| 6  | -3.930428000 | -0.693087000 | -1.150501000 |
| 6  | -3.792083000 | -1.291757000 | 1.182324000  |
| 6  | -5.284193000 | -1.010839000 | -1.149510000 |
| 1  | -3.445468000 | -0.340809000 | -2.054868000 |
| 6  | -5.145926000 | -1.611298000 | 1.178512000  |
| 1  | -3.198506000 | -1.399932000 | 2.083923000  |
| 6  | -5.894382000 | -1.470054000 | 0.014068000  |
| 1  | -5.861788000 | -0.903859000 | -2.061895000 |
| 1  | -5.615607000 | -1.971562000 | 2.087990000  |
| 1  | -6.950283000 | -1.719900000 | 0.012366000  |
| 8  | -2.314279000 | 1.595038000  | 0.123567000  |
| 6  | -2.070525000 | 2.999581000  | 0.183815000  |
| 1  | -1.454267000 | 3.242985000  | 1.049241000  |
| 1  | -1.591433000 | 3.340985000  | -0.733682000 |
| 1  | -3.052895000 | 3.458481000  | 0.284124000  |

**3a,** TE = - 1946.776532

|    |              |              |              |
|----|--------------|--------------|--------------|
| 6  | 0.293791000  | 2.602789000  | -1.154831000 |
| 6  | 0.200858000  | 1.621918000  | 1.007756000  |
| 1  | 0.237638000  | 1.844263000  | 2.084142000  |
| 7  | 0.322840000  | 2.723250000  | 0.278973000  |
| 7  | 0.142993000  | 1.347292000  | -1.441342000 |
| 6  | 0.484775000  | 4.059297000  | 0.830838000  |
| 1  | -0.333060000 | 4.705984000  | 0.503329000  |
| 1  | 0.487044000  | 4.005029000  | 1.920154000  |
| 1  | 1.425354000  | 4.498503000  | 0.489342000  |
| 6  | 0.086204000  | 0.989529000  | -2.840864000 |
| 1  | 0.883292000  | 0.276280000  | -3.080578000 |
| 1  | -0.863879000 | 0.490665000  | -3.065018000 |
| 1  | 0.188764000  | 1.872397000  | -3.482165000 |
| 25 | -0.004616000 | -0.043553000 | 0.082060000  |

|   |              |              |              |
|---|--------------|--------------|--------------|
| 6 | -0.194109000 | -1.551041000 | -1.048100000 |
| 7 | -0.310876000 | -2.487640000 | -1.747845000 |
| 6 | -0.098478000 | -0.999531000 | 1.651420000  |
| 7 | -0.149600000 | -1.551366000 | 2.692337000  |
| 6 | -1.876732000 | 0.164836000  | 0.070423000  |
| 7 | -3.042793000 | 0.295109000  | 0.060503000  |
| 6 | 1.864244000  | -0.273754000 | 0.033451000  |
| 7 | 3.028557000  | -0.416302000 | 0.003896000  |
| 6 | 4.430265000  | -0.584028000 | -0.013436000 |
| 1 | 4.892231000  | 0.031825000  | 0.761632000  |
| 1 | 4.685658000  | -1.630619000 | 0.167682000  |
| 1 | 4.830980000  | -0.286867000 | -0.985190000 |
| 6 | -0.450619000 | -3.606449000 | -2.597005000 |
| 1 | -0.601418000 | -4.513061000 | -2.005842000 |
| 1 | -1.309257000 | -3.470999000 | -3.258847000 |
| 1 | 0.447419000  | -3.729387000 | -3.206898000 |
| 6 | -0.226551000 | -2.280387000 | 3.897816000  |
| 1 | 0.676909000  | -2.126484000 | 4.493420000  |
| 1 | -1.089258000 | -1.954456000 | 4.484601000  |
| 1 | -0.329818000 | -3.348901000 | 3.690484000  |
| 6 | -4.445945000 | 0.452125000  | 0.054670000  |
| 1 | -4.887421000 | -0.091507000 | 0.893086000  |
| 1 | -4.706508000 | 1.509330000  | 0.143312000  |
| 1 | -4.863347000 | 0.062603000  | -0.876627000 |

**3b**, TE = - 2080.555017

|    |              |              |              |
|----|--------------|--------------|--------------|
| 6  | -1.129689000 | 1.008177000  | -2.355901000 |
| 6  | -1.586563000 | 0.332828000  | -0.090807000 |
| 7  | -2.048021000 | 0.808013000  | -1.285898000 |
| 7  | 0.066627000  | 0.675686000  | -1.989372000 |
| 25 | 0.407578000  | 0.014111000  | -0.072094000 |
| 6  | 2.223459000  | -0.272969000 | -0.402965000 |
| 7  | 3.370696000  | -0.467188000 | -0.579733000 |
| 6  | 0.667943000  | -0.591790000 | 1.636326000  |
| 7  | 0.965365000  | -1.013376000 | 2.704817000  |
| 6  | -0.004320000 | -1.734563000 | -0.624143000 |
| 7  | -0.268601000 | -2.829943000 | -0.956553000 |
| 6  | 0.729459000  | 1.786101000  | 0.474532000  |
| 7  | 0.920059000  | 2.892608000  | 0.820711000  |
| 6  | 1.123568000  | 4.222418000  | 1.248327000  |
| 1  | 0.336217000  | 4.519607000  | 1.945377000  |
| 1  | 2.090107000  | 4.313690000  | 1.749470000  |
| 1  | 1.107419000  | 4.899365000  | 0.390919000  |
| 6  | 4.738236000  | -0.666364000 | -0.864565000 |
| 1  | 5.354087000  | -0.019198000 | -0.235171000 |
| 1  | 5.017546000  | -1.705851000 | -0.675706000 |



|   |              |              |              |
|---|--------------|--------------|--------------|
| 1 | 4.943199000  | -0.433368000 | -1.912847000 |
| 6 | 0.897626000  | -1.407794000 | 4.061287000  |
| 1 | -0.107366000 | -1.241699000 | 4.462962000  |
| 1 | 1.141930000  | -2.468422000 | 4.162315000  |
| 1 | 1.610917000  | -0.835533000 | 4.660202000  |
| 6 | -0.584621000 | -4.147885000 | -1.351631000 |
| 1 | 0.303420000  | -4.646614000 | -1.747129000 |
| 1 | -0.956443000 | -4.717908000 | -0.496842000 |
| 1 | -1.354788000 | -4.134042000 | -2.126427000 |
| 6 | 1.118019000  | 0.832178000  | -2.968897000 |
| 6 | -3.360717000 | 1.416108000  | -1.482308000 |
| 7 | -2.536992000 | 0.027414000  | 0.825441000  |
| 6 | -2.206695000 | -0.096511000 | 2.230283000  |
| 1 | -3.059506000 | 0.254216000  | 2.820529000  |
| 1 | -1.999815000 | -1.136930000 | 2.512817000  |
| 1 | -1.343543000 | 0.520300000  | 2.464557000  |
| 6 | -3.828834000 | -0.567200000 | 0.500799000  |
| 1 | -4.671808000 | 0.100243000  | 0.709114000  |
| 1 | -3.861122000 | -0.872231000 | -0.543087000 |
| 1 | -3.950404000 | -1.466707000 | 1.113422000  |
| 1 | 0.719181000  | 1.221897000  | -3.913021000 |
| 1 | 1.889712000  | 1.517292000  | -2.597007000 |
| 1 | 1.612768000  | -0.127368000 | -3.161688000 |
| 1 | -3.744994000 | 1.794555000  | -0.533629000 |
| 1 | -3.232982000 | 2.250608000  | -2.171067000 |
| 1 | -4.098324000 | 0.732439000  | -1.913615000 |

**3c**, TE = - 2061.194755

|    |              |              |              |
|----|--------------|--------------|--------------|
| 6  | 1.815162000  | -0.000332000 | -2.215939000 |
| 6  | 1.767959000  | -0.009569000 | 0.173004000  |
| 7  | 2.494489000  | -0.008714000 | -0.963357000 |
| 7  | 0.536104000  | 0.006312000  | -2.007916000 |
| 25 | -0.192780000 | 0.001219000  | -0.075947000 |
| 6  | -1.977609000 | 0.013585000  | -0.658176000 |
| 7  | -3.102185000 | 0.021491000  | -0.998784000 |
| 6  | -0.788437000 | -0.005000000 | 1.666638000  |
| 7  | -1.273101000 | -0.008536000 | 2.743894000  |
| 6  | -0.163747000 | 1.884102000  | -0.067305000 |
| 7  | -0.144422000 | 3.057713000  | -0.055803000 |
| 6  | -0.183140000 | -1.881785000 | -0.087027000 |
| 7  | -0.175888000 | -3.055580000 | -0.088246000 |
| 6  | -0.158422000 | -4.467304000 | -0.074936000 |
| 1  | 0.377248000  | -4.828530000 | 0.806097000  |
| 1  | -1.179076000 | -4.855936000 | -0.051349000 |
| 1  | 0.341525000  | -4.844384000 | -0.970004000 |
| 6  | -4.431967000 | 0.031261000  | -1.471908000 |

|   |              |              |              |
|---|--------------|--------------|--------------|
| 1 | -5.019988000 | -0.734603000 | -0.960763000 |
| 1 | -4.889953000 | 1.006097000  | -1.288683000 |
| 1 | -4.450408000 | -0.169750000 | -2.546069000 |
| 6 | -1.632045000 | -0.014506000 | 4.108784000  |
| 1 | -2.230522000 | -0.899249000 | 4.340698000  |
| 1 | -0.738203000 | -0.022582000 | 4.739962000  |
| 1 | -2.221618000 | 0.873505000  | 4.350809000  |
| 6 | -0.113796000 | 4.468960000  | -0.026706000 |
| 1 | -1.130282000 | 4.868006000  | -0.056038000 |
| 1 | 0.375195000  | 4.815660000  | 0.886685000  |
| 1 | 0.439241000  | 4.849743000  | -0.888342000 |
| 6 | -0.316147000 | 0.015441000  | -3.175189000 |
| 6 | 3.949482000  | -0.015620000 | -0.960338000 |
| 8 | 2.601830000  | -0.017368000 | 1.215754000  |
| 6 | 2.077910000  | -0.019299000 | 2.537154000  |
| 1 | 1.473160000  | -0.910248000 | 2.711381000  |
| 1 | 2.945301000  | -0.023993000 | 3.197437000  |
| 1 | 1.478935000  | 0.874551000  | 2.716282000  |
| 1 | 4.274650000  | -0.012114000 | -1.999012000 |
| 1 | 4.348826000  | 0.865149000  | -0.450232000 |
| 1 | 4.340498000  | -0.905026000 | -0.458804000 |
| 1 | -0.964446000 | 0.899796000  | -3.170535000 |
| 1 | 0.280095000  | 0.015240000  | -4.094832000 |
| 1 | -0.974802000 | -0.861286000 | -3.176730000 |

**3'a**, TE = - 2329.790976

|    |              |              |              |
|----|--------------|--------------|--------------|
| 6  | -1.032149000 | -1.561919000 | -0.222744000 |
| 6  | -1.385228000 | 0.781933000  | 0.057891000  |
| 1  | -2.165815000 | 1.545078000  | 0.174759000  |
| 7  | -1.919645000 | -0.441580000 | -0.099461000 |
| 7  | 0.187462000  | -1.099866000 | -0.184095000 |
| 25 | 0.496361000  | 0.946211000  | 0.108103000  |
| 6  | 2.399639000  | 0.858938000  | 0.160100000  |
| 7  | 3.569550000  | 0.797102000  | 0.201174000  |
| 6  | 0.395883000  | 2.765031000  | 0.379466000  |
| 7  | 0.264522000  | 3.922482000  | 0.548551000  |
| 6  | 0.499763000  | 0.661967000  | 1.976751000  |
| 7  | 0.503878000  | 0.493635000  | 3.135921000  |
| 6  | 0.594048000  | 1.235294000  | -1.756411000 |
| 7  | 0.655235000  | 1.427236000  | -2.910724000 |
| 6  | 0.710392000  | 1.650047000  | -4.304224000 |
| 1  | -0.296122000 | 1.807016000  | -4.698226000 |
| 1  | 1.316886000  | 2.532741000  | -4.518155000 |
| 1  | 1.155127000  | 0.785849000  | -4.802594000 |
| 6  | 4.968481000  | 0.606859000  | 0.216536000  |
| 1  | 5.458649000  | 1.376009000  | -0.384172000 |

|   |              |              |              |
|---|--------------|--------------|--------------|
| 1 | 5.342467000  | 0.667391000  | 1.240757000  |
| 1 | 5.213034000  | -0.376160000 | -0.194039000 |
| 6 | 0.167449000  | 5.316296000  | 0.748769000  |
| 1 | -0.327706000 | 5.787273000  | -0.103936000 |
| 1 | -0.411791000 | 5.529391000  | 1.650476000  |
| 1 | 1.163182000  | 5.753031000  | 0.860693000  |
| 6 | 0.499379000  | 0.297250000  | 4.534571000  |
| 1 | 1.070139000  | 1.088944000  | 5.024727000  |
| 1 | -0.525638000 | 0.313346000  | 4.911178000  |
| 1 | 0.951173000  | -0.666985000 | 4.777196000  |
| 6 | 1.225790000  | -2.054439000 | -0.272539000 |
| 6 | 2.178598000  | -1.959467000 | -1.291018000 |
| 6 | 1.340721000  | -3.089935000 | 0.658975000  |
| 6 | 3.209797000  | -2.885951000 | -1.384107000 |
| 1 | 2.095773000  | -1.153345000 | -2.012151000 |
| 6 | 2.380386000  | -4.011236000 | 0.569386000  |
| 1 | 0.607563000  | -3.159857000 | 1.455737000  |
| 6 | 3.319777000  | -3.916404000 | -0.452410000 |
| 1 | 3.932687000  | -2.803655000 | -2.190383000 |
| 1 | 2.455210000  | -4.807095000 | 1.304606000  |
| 1 | 4.130140000  | -4.634933000 | -0.521771000 |
| 6 | -3.324233000 | -0.675070000 | -0.144961000 |
| 6 | -3.875013000 | -1.761848000 | 0.533940000  |
| 6 | -4.156794000 | 0.184677000  | -0.860611000 |
| 6 | -5.247834000 | -1.975690000 | 0.504502000  |
| 1 | -3.218297000 | -2.427708000 | 1.080701000  |
| 6 | -5.530415000 | -0.031373000 | -0.879983000 |
| 1 | -3.728107000 | 1.012160000  | -1.416220000 |
| 6 | -6.082488000 | -1.111204000 | -0.198584000 |
| 1 | -5.667841000 | -2.820625000 | 1.040983000  |
| 1 | -6.168527000 | 0.641975000  | -1.443217000 |
| 1 | -7.153905000 | -1.280728000 | -0.218868000 |

**3'b**, TE = - 2463.571792

|    |              |              |              |
|----|--------------|--------------|--------------|
| 6  | 0.800507000  | -1.693281000 | -0.185291000 |
| 6  | 1.263054000  | 0.687428000  | -0.136444000 |
| 7  | 1.725590000  | -0.618683000 | -0.218126000 |
| 7  | -0.412103000 | -1.237849000 | -0.034656000 |
| 25 | -0.737252000 | 0.814125000  | 0.041308000  |
| 6  | -2.596172000 | 0.618352000  | 0.046972000  |
| 7  | -3.769553000 | 0.536941000  | 0.026925000  |
| 6  | -0.993662000 | 2.633095000  | 0.049218000  |
| 7  | -1.282859000 | 3.778919000  | 0.042642000  |
| 6  | -0.750601000 | 0.844521000  | -1.841120000 |
| 7  | -0.755015000 | 0.885545000  | -3.014154000 |
| 6  | -0.654378000 | 0.802114000  | 1.925039000  |

|   |              |              |              |
|---|--------------|--------------|--------------|
| 7 | -0.596230000 | 0.812580000  | 3.097944000  |
| 6 | -0.499583000 | 0.818158000  | 4.506346000  |
| 1 | 0.549461000  | 0.828267000  | 4.811729000  |
| 1 | -0.993861000 | 1.703276000  | 4.913355000  |
| 1 | -0.978251000 | -0.072926000 | 4.919388000  |
| 6 | -5.146580000 | 0.226562000  | 0.044195000  |
| 1 | -5.662937000 | 0.836207000  | 0.789430000  |
| 1 | -5.590922000 | 0.421859000  | -0.934696000 |
| 1 | -5.285737000 | -0.829562000 | 0.292098000  |
| 6 | -1.373018000 | 5.187300000  | 0.061120000  |
| 1 | -0.376902000 | 5.634337000  | 0.136375000  |
| 1 | -1.849656000 | 5.550202000  | -0.853118000 |
| 1 | -1.969226000 | 5.519028000  | 0.915133000  |
| 6 | -0.763942000 | 0.935650000  | -4.425234000 |
| 1 | -1.459517000 | 0.193142000  | -4.823158000 |
| 1 | -1.075244000 | 1.926716000  | -4.763367000 |
| 1 | 0.235061000  | 0.727691000  | -4.815381000 |
| 6 | -1.438314000 | -2.205659000 | -0.004181000 |
| 6 | -2.308648000 | -2.274900000 | 1.089022000  |
| 6 | -1.623952000 | -3.103718000 | -1.059894000 |
| 6 | -3.323498000 | -3.222959000 | 1.130654000  |
| 1 | -2.174284000 | -1.575711000 | 1.907481000  |
| 6 | -2.645654000 | -4.048646000 | -1.019940000 |
| 1 | -0.957088000 | -3.046382000 | -1.913820000 |
| 6 | -3.501471000 | -4.115707000 | 0.074916000  |
| 1 | -3.979541000 | -3.267540000 | 1.995215000  |
| 1 | -2.773451000 | -4.734543000 | -1.852499000 |
| 1 | -4.298522000 | -4.851696000 | 0.105767000  |
| 6 | 3.082188000  | -1.016194000 | 0.004945000  |
| 6 | 3.692146000  | -1.941261000 | -0.841285000 |
| 6 | 3.782824000  | -0.533981000 | 1.109586000  |
| 6 | 4.991127000  | -2.367059000 | -0.592654000 |
| 1 | 3.137658000  | -2.322167000 | -1.691322000 |
| 6 | 5.085401000  | -0.958439000 | 1.352077000  |
| 1 | 3.304993000  | 0.173776000  | 1.778905000  |
| 6 | 5.696287000  | -1.875471000 | 0.503161000  |
| 1 | 5.455960000  | -3.085301000 | -1.260855000 |
| 1 | 5.619758000  | -0.575509000 | 2.215838000  |
| 1 | 6.711259000  | -2.207610000 | 0.695118000  |
| 7 | 2.175520000  | 1.644053000  | -0.379104000 |
| 6 | 1.952045000  | 3.016212000  | 0.033847000  |
| 1 | 2.902796000  | 3.429058000  | 0.386286000  |
| 1 | 1.595048000  | 3.636798000  | -0.796615000 |
| 1 | 1.233755000  | 3.046880000  | 0.847084000  |
| 6 | 3.361624000  | 1.506694000  | -1.216252000 |
| 1 | 4.286135000  | 1.484509000  | -0.630211000 |

|   |             |             |              |
|---|-------------|-------------|--------------|
| 1 | 3.305815000 | 0.607717000 | -1.825688000 |
| 1 | 3.394926000 | 2.372943000 | -1.884297000 |

3'c, TE = - 2444.206673

|    |              |              |              |
|----|--------------|--------------|--------------|
| 6  | -0.933342000 | -1.675842000 | -0.065647000 |
| 6  | -1.327821000 | 0.696093000  | -0.060583000 |
| 7  | -1.826829000 | -0.575087000 | -0.047656000 |
| 7  | 0.291783000  | -1.228070000 | -0.091972000 |
| 25 | 0.626985000  | 0.827938000  | 0.019912000  |
| 6  | 2.496081000  | 0.618321000  | 0.110501000  |
| 7  | 3.662773000  | 0.514068000  | 0.182601000  |
| 6  | 0.860067000  | 2.651320000  | 0.162601000  |
| 7  | 1.116107000  | 3.797992000  | 0.262075000  |
| 6  | 0.532290000  | 0.704931000  | 1.900916000  |
| 7  | 0.469731000  | 0.639283000  | 3.069821000  |
| 6  | 0.706068000  | 0.965490000  | -1.859061000 |
| 7  | 0.754133000  | 1.068268000  | -3.026665000 |
| 6  | 0.801935000  | 1.189634000  | -4.432691000 |
| 1  | -0.194128000 | 1.407015000  | -4.824999000 |
| 1  | 1.478153000  | 1.999267000  | -4.716056000 |
| 1  | 1.160983000  | 0.258315000  | -4.876632000 |
| 6  | 5.044522000  | 0.229442000  | 0.235575000  |
| 1  | 5.594370000  | 0.905444000  | -0.422992000 |
| 1  | 5.415171000  | 0.353414000  | 1.255554000  |
| 1  | 5.221351000  | -0.801056000 | -0.084009000 |
| 6  | 1.255830000  | 5.198190000  | 0.366673000  |
| 1  | 1.886403000  | 5.577764000  | -0.441211000 |
| 1  | 0.277875000  | 5.684497000  | 0.305123000  |
| 1  | 1.718075000  | 5.462828000  | 1.320957000  |
| 6  | 0.384684000  | 0.564480000  | 4.477537000  |
| 1  | 0.911663000  | 1.407804000  | 4.929293000  |
| 1  | -0.661029000 | 0.590978000  | 4.791994000  |
| 1  | 0.836977000  | -0.364884000 | 4.830782000  |
| 6  | 1.315632000  | -2.199872000 | -0.080041000 |
| 6  | 2.254723000  | -2.242085000 | -1.115490000 |
| 6  | 1.430529000  | -3.121495000 | 0.964490000  |
| 6  | 3.271735000  | -3.188880000 | -1.112077000 |
| 1  | 2.172793000  | -1.524745000 | -1.925406000 |
| 6  | 2.454696000  | -4.064519000 | 0.970194000  |
| 1  | 0.708125000  | -3.084416000 | 1.773266000  |
| 6  | 3.380612000  | -4.105136000 | -0.067416000 |
| 1  | 3.983665000  | -3.213508000 | -1.931944000 |
| 1  | 2.528470000  | -4.770237000 | 1.792529000  |
| 1  | 4.179201000  | -4.840044000 | -0.062738000 |
| 6  | -3.229763000 | -0.864187000 | -0.074641000 |
| 6  | -4.018032000 | -0.623762000 | 1.047060000  |

|   |              |              |              |
|---|--------------|--------------|--------------|
| 6 | -3.799309000 | -1.414640000 | -1.218372000 |
| 6 | -5.374126000 | -0.929845000 | 1.021246000  |
| 1 | -3.564871000 | -0.201320000 | 1.937733000  |
| 6 | -5.155662000 | -1.723384000 | -1.240587000 |
| 1 | -3.173573000 | -1.602835000 | -2.084289000 |
| 6 | -5.946782000 | -1.480214000 | -0.122029000 |
| 1 | -5.983766000 | -0.743049000 | 1.899529000  |
| 1 | -5.594131000 | -2.154827000 | -2.134768000 |
| 1 | -7.004632000 | -1.721417000 | -0.139506000 |
| 8 | -2.337823000 | 1.554382000  | -0.142957000 |
| 6 | -2.078217000 | 2.952349000  | -0.198494000 |
| 1 | -1.415784000 | 3.187159000  | -1.032148000 |
| 1 | -3.049573000 | 3.423852000  | -0.346437000 |
| 1 | -1.635791000 | 3.296965000  | 0.736823000  |

4'a, TE = - 2443.113820

|   |              |              |              |
|---|--------------|--------------|--------------|
| 6 | 1.056732000  | -1.415549000 | -0.194321000 |
| 6 | 1.380494000  | 1.031410000  | -0.118775000 |
| 1 | 1.706582000  | 1.554665000  | -1.028860000 |
| 7 | -0.210889000 | -1.039661000 | -0.177402000 |
| 1 | 1.842592000  | 1.566226000  | 0.721959000  |
| 6 | -0.667560000 | 2.756758000  | 0.250428000  |
| 6 | -0.353693000 | 0.671453000  | 1.874947000  |
| 6 | -0.721907000 | 1.085284000  | -1.807580000 |
| 7 | -0.643047000 | 3.917290000  | 0.372011000  |
| 7 | -0.732055000 | 1.180034000  | -2.969261000 |
| 7 | -0.145047000 | 0.497005000  | 3.007749000  |
| 6 | 0.118749000  | 0.264399000  | 4.377380000  |
| 1 | 0.730439000  | -0.632961000 | 4.486076000  |
| 1 | 0.654096000  | 1.116812000  | 4.798996000  |
| 1 | -0.820261000 | 0.127195000  | 4.916284000  |
| 6 | -0.616215000 | 5.322970000  | 0.520950000  |
| 1 | -0.003029000 | 5.591369000  | 1.383131000  |
| 1 | -0.193748000 | 5.781449000  | -0.374986000 |
| 1 | -1.629966000 | 5.698694000  | 0.671514000  |
| 6 | -0.736516000 | 1.271853000  | -4.380278000 |
| 1 | -0.215669000 | 2.178873000  | -4.691891000 |
| 1 | -0.230995000 | 0.403550000  | -4.806591000 |
| 1 | -1.764502000 | 1.304590000  | -4.745315000 |
| 6 | -1.176312000 | -2.062449000 | -0.188760000 |
| 6 | -2.273246000 | -1.999254000 | -1.058045000 |
| 6 | -1.084849000 | -3.167065000 | 0.670468000  |
| 6 | -3.231759000 | -3.005850000 | -1.077833000 |
| 1 | -2.359359000 | -1.153585000 | -1.731574000 |
| 6 | -2.045292000 | -4.172524000 | 0.650223000  |
| 1 | -0.245206000 | -3.220033000 | 1.354900000  |

|    |              |              |              |
|----|--------------|--------------|--------------|
| 6  | -3.126940000 | -4.101347000 | -0.223748000 |
| 1  | -4.064875000 | -2.936000000 | -1.771413000 |
| 1  | -1.950941000 | -5.015085000 | 1.329565000  |
| 1  | -3.878139000 | -4.884528000 | -0.236887000 |
| 26 | -0.633691000 | 0.932790000  | 0.048280000  |
| 6  | -2.487011000 | 0.772429000  | 0.251872000  |
| 7  | -3.641436000 | 0.713185000  | 0.410214000  |
| 6  | -5.036604000 | 0.556738000  | 0.571154000  |
| 1  | -5.563379000 | 1.337291000  | 0.019324000  |
| 1  | -5.340204000 | -0.420914000 | 0.190442000  |
| 1  | -5.297604000 | 0.627358000  | 1.628589000  |
| 7  | 1.908499000  | -0.346929000 | -0.144103000 |
| 6  | 3.294662000  | -0.548193000 | -0.168088000 |
| 6  | 4.176490000  | 0.542308000  | -0.260033000 |
| 6  | 3.861373000  | -1.835469000 | -0.087339000 |
| 6  | 5.555430000  | 0.349823000  | -0.278104000 |
| 1  | 3.784924000  | 1.549365000  | -0.321118000 |
| 6  | 5.235799000  | -2.012918000 | -0.107272000 |
| 1  | 3.193245000  | -2.682618000 | -0.008542000 |
| 6  | 6.103167000  | -0.924440000 | -0.204081000 |
| 1  | 6.204935000  | 1.217400000  | -0.352528000 |
| 1  | 5.636611000  | -3.020703000 | -0.042164000 |
| 1  | 7.178277000  | -1.069633000 | -0.217655000 |

**4'b**, TE = - 5590.607449

|   |              |              |              |
|---|--------------|--------------|--------------|
| 6 | 1.282774000  | 1.421448000  | 0.180077000  |
| 6 | 1.427422000  | -1.059741000 | 0.155658000  |
| 1 | 1.718691000  | -1.572898000 | 1.082225000  |
| 7 | -0.019185000 | 1.174272000  | 0.163128000  |
| 1 | 1.866159000  | -1.640661000 | -0.665766000 |
| 6 | -0.919902000 | -2.758410000 | -0.215287000 |
| 6 | -0.360904000 | -0.660579000 | -1.981637000 |
| 6 | -0.798107000 | -0.977013000 | 1.933026000  |
| 7 | -1.024957000 | -3.918249000 | -0.316515000 |
| 7 | -0.826708000 | -1.056467000 | 3.095044000  |
| 7 | -0.140317000 | -0.549865000 | -3.119713000 |
| 6 | 0.126888000  | -0.408021000 | -4.501057000 |
| 1 | 0.881344000  | 0.366124000  | -4.650659000 |
| 1 | 0.496536000  | -1.353212000 | -4.902144000 |
| 1 | -0.787735000 | -0.126570000 | -5.025564000 |
| 6 | -1.156636000 | -5.320170000 | -0.436920000 |
| 1 | -0.594931000 | -5.671945000 | -1.304461000 |
| 1 | -0.769003000 | -5.807174000 | 0.460012000  |
| 1 | -2.208454000 | -5.585476000 | -0.561018000 |
| 6 | -0.862843000 | -1.140804000 | 4.506087000  |
| 1 | -0.373871000 | -2.060511000 | 4.831608000  |

|    |              |              |              |
|----|--------------|--------------|--------------|
| 1  | -0.342181000 | -0.284267000 | 4.937630000  |
| 1  | -1.899051000 | -1.142673000 | 4.848417000  |
| 6  | -0.873432000 | 2.293059000  | 0.167333000  |
| 6  | -2.010593000 | 2.316515000  | 0.984394000  |
| 6  | -0.626977000 | 3.408986000  | -0.645842000 |
| 6  | -2.862233000 | 3.415338000  | 0.996345000  |
| 1  | -2.214135000 | 1.462930000  | 1.621660000  |
| 6  | -1.480971000 | 4.505870000  | -0.633440000 |
| 1  | 0.245625000  | 3.395364000  | -1.289175000 |
| 6  | -2.605644000 | 4.519922000  | 0.187773000  |
| 1  | -3.731035000 | 3.409812000  | 1.648357000  |
| 1  | -1.269637000 | 5.353988000  | -1.278662000 |
| 1  | -3.274055000 | 5.374892000  | 0.193747000  |
| 6  | -2.630092000 | -0.506357000 | -0.258180000 |
| 7  | -3.772366000 | -0.321368000 | -0.414070000 |
| 6  | -5.146331000 | -0.035238000 | -0.580208000 |
| 1  | -5.744776000 | -0.748863000 | -0.010968000 |
| 1  | -5.356302000 | 0.975345000  | -0.223480000 |
| 1  | -5.413921000 | -0.105824000 | -1.636063000 |
| 7  | 2.042140000  | 0.288342000  | 0.148640000  |
| 6  | 3.442531000  | 0.390590000  | 0.170016000  |
| 6  | 4.243953000  | -0.754677000 | 0.309908000  |
| 6  | 4.099076000  | 1.629504000  | 0.037252000  |
| 6  | 5.633220000  | -0.660366000 | 0.325013000  |
| 1  | 3.783317000  | -1.728488000 | 0.412553000  |
| 6  | 5.482668000  | 1.709528000  | 0.055165000  |
| 1  | 3.494510000  | 2.519016000  | -0.078303000 |
| 6  | 6.270095000  | 0.567342000  | 0.200111000  |
| 1  | 6.218960000  | -1.568127000 | 0.437909000  |
| 1  | 5.954122000  | 2.682596000  | -0.051015000 |
| 1  | 7.352788000  | 0.636216000  | 0.211210000  |
| 44 | -0.679250000 | -0.851741000 | -0.037208000 |

**5a**, TE = - 2482.311213

|   |              |              |              |
|---|--------------|--------------|--------------|
| 6 | 0.264125000  | 1.323471000  | -0.889551000 |
| 6 | -1.860962000 | -0.005667000 | -0.486445000 |
| 6 | 0.269730000  | -1.328207000 | -0.882714000 |
| 7 | -1.173195000 | -1.155443000 | -0.610474000 |
| 7 | -1.177886000 | 1.146345000  | -0.615536000 |
| 6 | -1.941816000 | -2.344996000 | -0.494016000 |
| 6 | -1.668128000 | -3.451907000 | -1.304851000 |
| 6 | -2.975593000 | -2.445985000 | 0.443754000  |
| 6 | -2.417617000 | -4.618255000 | -1.189576000 |
| 1 | -0.874117000 | -3.393439000 | -2.040607000 |
| 6 | -3.720372000 | -3.613134000 | 0.554702000  |
| 1 | -3.182114000 | -1.592327000 | 1.077703000  |



|    |              |              |              |
|----|--------------|--------------|--------------|
| 6  | -3.449097000 | -4.709472000 | -0.260885000 |
| 1  | -2.193607000 | -5.459589000 | -1.838548000 |
| 1  | -4.513355000 | -3.669829000 | 1.294638000  |
| 1  | -4.029685000 | -5.621631000 | -0.169578000 |
| 6  | -1.951134000 | 2.333348000  | -0.503981000 |
| 6  | -1.682389000 | 3.437618000  | -1.320052000 |
| 6  | -2.984679000 | 2.434531000  | 0.434013000  |
| 6  | -2.436462000 | 4.601470000  | -1.209646000 |
| 1  | -0.888656000 | 3.378920000  | -2.056088000 |
| 6  | -3.734057000 | 3.599192000  | 0.540099000  |
| 1  | -3.187517000 | 1.582943000  | 1.071919000  |
| 6  | -3.467689000 | 4.692838000  | -0.280685000 |
| 1  | -2.216247000 | 5.440696000  | -1.862633000 |
| 1  | -4.526798000 | 3.656095000  | 1.280277000  |
| 1  | -4.051858000 | 5.603082000  | -0.193182000 |
| 1  | 0.421954000  | -1.270430000 | -1.967880000 |
| 1  | 0.511098000  | -2.352786000 | -0.589190000 |
| 1  | 0.501622000  | 2.350632000  | -0.601971000 |
| 1  | 0.415857000  | 1.260213000  | -1.974494000 |
| 26 | 1.516763000  | 0.002696000  | 0.049862000  |
| 6  | 0.422239000  | 0.003698000  | 1.541593000  |
| 7  | -0.240723000 | 0.004360000  | 2.502936000  |
| 6  | 2.513995000  | 1.390488000  | 0.754711000  |
| 7  | 3.120038000  | 2.295240000  | 1.183373000  |
| 6  | 2.526868000  | 0.001401000  | -1.499377000 |
| 7  | 3.134746000  | 0.000656000  | -2.496856000 |
| 6  | 2.520636000  | -1.376926000 | 0.761392000  |
| 7  | 3.131214000  | -2.276620000 | 1.194242000  |
| 6  | 3.856861000  | 3.382098000  | 1.706176000  |
| 1  | 4.318311000  | 3.098099000  | 2.654206000  |
| 1  | 4.639761000  | 3.672414000  | 1.002720000  |
| 1  | 3.195569000  | 4.234654000  | 1.873486000  |
| 6  | -1.089126000 | 0.004776000  | 3.632470000  |
| 1  | -0.492208000 | 0.017644000  | 4.546534000  |
| 1  | -1.731371000 | 0.887719000  | 3.614032000  |
| 1  | -1.714066000 | -0.890664000 | 3.627709000  |
| 6  | 3.873560000  | -3.357189000 | 1.722244000  |
| 1  | 4.653676000  | -3.651238000 | 1.017248000  |
| 1  | 4.339020000  | -3.064177000 | 2.665560000  |
| 1  | 3.215391000  | -4.210069000 | 1.899896000  |
| 6  | 3.878966000  | -0.000578000 | -3.698801000 |
| 1  | 4.434652000  | -0.935811000 | -3.790190000 |
| 1  | 3.205204000  | 0.099011000  | -4.551773000 |
| 1  | 4.582418000  | 0.834278000  | -3.700228000 |

5b, TE = - 5629.806655

|   |              |              |              |
|---|--------------|--------------|--------------|
| 6 | 0.106943000  | -1.359914000 | 0.940950000  |
| 6 | -2.005343000 | -0.004140000 | 0.499314000  |
| 6 | 0.098601000  | 1.365420000  | 0.936727000  |
| 7 | -1.335232000 | 1.154959000  | 0.635858000  |
| 7 | -1.328455000 | -1.158823000 | 0.640823000  |
| 6 | -2.125441000 | 2.330527000  | 0.506208000  |
| 6 | -1.906395000 | 3.430098000  | 1.342433000  |
| 6 | -3.123177000 | 2.422728000  | -0.469819000 |
| 6 | -2.675925000 | 4.581882000  | 1.214507000  |
| 1 | -1.139656000 | 3.377001000  | 2.107032000  |
| 6 | -3.887952000 | 3.575685000  | -0.593864000 |
| 1 | -3.286068000 | 1.573877000  | -1.122792000 |
| 6 | -3.672211000 | 4.664838000  | 0.247376000  |
| 1 | -2.495748000 | 5.418127000  | 1.883318000  |
| 1 | -4.652366000 | 3.627031000  | -1.363580000 |
| 1 | -4.268468000 | 5.565776000  | 0.146386000  |
| 6 | -2.112384000 | -2.339294000 | 0.517899000  |
| 6 | -1.883615000 | -3.435243000 | 1.356312000  |
| 6 | -3.113944000 | -2.440017000 | -0.453452000 |
| 6 | -2.647075000 | -4.591805000 | 1.234914000  |
| 1 | -1.114125000 | -3.375778000 | 2.117658000  |
| 6 | -3.872533000 | -3.597684000 | -0.570964000 |
| 1 | -3.284788000 | -1.593706000 | -1.107642000 |
| 6 | -3.646949000 | -4.683291000 | 0.272321000  |
| 1 | -2.459194000 | -5.425041000 | 1.905364000  |
| 1 | -4.639997000 | -3.655544000 | -1.337183000 |
| 1 | -4.238434000 | -5.587916000 | 0.176384000  |
| 1 | 0.235269000  | 1.295008000  | 2.022988000  |
| 1 | 0.317839000  | 2.399829000  | 0.663097000  |
| 1 | 0.332104000  | -2.393609000 | 0.669387000  |
| 1 | 0.244115000  | -1.286412000 | 2.026954000  |
| 6 | 0.294224000  | -0.001357000 | -1.639305000 |
| 7 | -0.373301000 | -0.005601000 | -2.596472000 |
| 6 | 2.529558000  | -1.468726000 | -0.791174000 |
| 7 | 3.132424000  | -2.380872000 | -1.210227000 |
| 6 | 2.505708000  | 0.011487000  | 1.618809000  |
| 7 | 3.098906000  | 0.014958000  | 2.624007000  |
| 6 | 2.519241000  | 1.484316000  | -0.796606000 |
| 7 | 3.115048000  | 2.399334000  | -1.219479000 |
| 6 | 3.872443000  | -3.467775000 | -1.728056000 |
| 1 | 4.637631000  | -3.104208000 | -2.417264000 |
| 1 | 4.356088000  | -4.009703000 | -0.912873000 |
| 1 | 3.207274000  | -4.149455000 | -2.261938000 |
| 6 | -1.211818000 | -0.011240000 | -3.733533000 |
| 1 | -0.605708000 | -0.021445000 | -4.641438000 |

|    |              |              |              |
|----|--------------|--------------|--------------|
| 1  | -1.848862000 | -0.897833000 | -3.718677000 |
| 1  | -1.840965000 | 0.881085000  | -3.733393000 |
| 6  | 3.846236000  | 3.489869000  | -1.742181000 |
| 1  | 4.319206000  | 4.043889000  | -0.928865000 |
| 1  | 4.619324000  | 3.128932000  | -2.423911000 |
| 1  | 3.176794000  | 4.159733000  | -2.285599000 |
| 6  | 3.836567000  | 0.019669000  | 3.830075000  |
| 1  | 4.455431000  | 0.917410000  | 3.880967000  |
| 1  | 3.152966000  | 0.007031000  | 4.680761000  |
| 1  | 4.479017000  | -0.861745000 | 3.873487000  |
| 44 | 1.450392000  | 0.005451000  | -0.044355000 |

**6a**, TE = -2630.346356

|    |              |              |              |
|----|--------------|--------------|--------------|
| 6  | 0.174050000  | 1.403535000  | 0.407417000  |
| 7  | -1.239168000 | 1.165397000  | 0.133815000  |
| 6  | -1.908338000 | 0.000056000  | 0.023665000  |
| 7  | -1.239243000 | -1.165310000 | 0.133931000  |
| 6  | 0.173929000  | -1.403466000 | 0.407766000  |
| 8  | 0.424577000  | 2.528629000  | 0.812641000  |
| 6  | -2.080961000 | 2.334584000  | 0.086330000  |
| 6  | -2.003630000 | 3.194918000  | -1.003876000 |
| 6  | -2.828360000 | 4.312928000  | -1.066129000 |
| 6  | -3.729280000 | 4.577193000  | -0.038254000 |
| 6  | -3.800942000 | 3.716381000  | 1.052944000  |
| 6  | -2.975929000 | 2.598139000  | 1.116451000  |
| 1  | -1.302064000 | 2.981421000  | -1.804100000 |
| 1  | -2.770167000 | 4.976775000  | -1.922905000 |
| 1  | -4.374026000 | 5.448568000  | -0.089128000 |
| 1  | -4.500944000 | 3.914886000  | 1.858389000  |
| 1  | -3.027575000 | 1.917762000  | 1.960126000  |
| 6  | -2.081093000 | -2.334461000 | 0.086520000  |
| 6  | -2.003671000 | -3.194935000 | -1.003567000 |
| 6  | -2.828456000 | -4.312908000 | -1.065786000 |
| 6  | -3.729515000 | -4.576995000 | -0.037988000 |
| 6  | -3.801261000 | -3.716046000 | 1.053098000  |
| 6  | -2.976198000 | -2.597840000 | 1.116569000  |
| 1  | -1.302000000 | -2.981570000 | -1.803735000 |
| 1  | -2.770198000 | -4.976861000 | -1.922475000 |
| 1  | -4.374304000 | -5.448339000 | -0.088833000 |
| 1  | -4.501370000 | -3.914417000 | 1.858483000  |
| 1  | -3.027912000 | -1.917355000 | 1.960152000  |
| 8  | 0.424313000  | -2.528437000 | 0.813429000  |
| 26 | 1.481751000  | -0.000084000 | 0.035369000  |
| 6  | 2.760328000  | -1.340710000 | -0.322220000 |
| 6  | 1.882278000  | 0.000176000  | 1.850009000  |
| 6  | 2.760484000  | 1.340327000  | -0.322563000 |

|   |              |              |              |
|---|--------------|--------------|--------------|
| 6 | 0.903595000  | -0.000239000 | -1.730835000 |
| 7 | 3.553705000  | 2.161574000  | -0.546244000 |
| 7 | 3.553454000  | -2.162115000 | -0.545662000 |
| 7 | 2.112124000  | 0.000375000  | 2.991105000  |
| 7 | 0.529481000  | -0.000324000 | -2.833493000 |
| 6 | 0.062328000  | -0.000403000 | -4.168256000 |
| 1 | 0.426149000  | -0.890021000 | -4.685053000 |
| 1 | -1.028962000 | -0.001252000 | -4.174022000 |
| 1 | 0.424761000  | 0.890003000  | -4.684673000 |
| 6 | 4.500614000  | 3.180086000  | -0.804312000 |
| 1 | 4.588860000  | 3.334720000  | -1.880806000 |
| 1 | 4.177110000  | 4.108899000  | -0.331651000 |
| 1 | 5.471937000  | 2.889052000  | -0.401308000 |
| 6 | 2.379495000  | 0.000942000  | 4.379748000  |
| 1 | 2.900596000  | -0.917824000 | 4.653818000  |
| 1 | 3.004405000  | 0.858914000  | 4.633105000  |
| 1 | 1.441685000  | 0.062198000  | 4.934406000  |
| 6 | 4.500238000  | -3.180792000 | -0.803534000 |
| 1 | 5.470880000  | -2.891135000 | -0.397909000 |
| 1 | 4.175101000  | -4.110243000 | -0.333252000 |
| 1 | 4.590705000  | -3.333538000 | -1.880113000 |

**6b**, TE = - 5777.837831

|   |              |              |              |
|---|--------------|--------------|--------------|
| 6 | 0.026150000  | 1.450099000  | 0.439641000  |
| 7 | -1.381000000 | 1.173873000  | 0.161125000  |
| 6 | -2.037061000 | -0.000062000 | 0.047067000  |
| 7 | -1.380946000 | -1.173942000 | 0.161172000  |
| 6 | 0.026240000  | -1.450092000 | 0.439835000  |
| 8 | 0.246917000  | 2.575614000  | 0.860823000  |
| 6 | -2.246076000 | 2.327105000  | 0.111972000  |
| 6 | -2.181915000 | 3.189449000  | -0.977397000 |
| 6 | -3.026660000 | 4.292413000  | -1.040741000 |
| 6 | -3.934681000 | 4.539468000  | -0.014997000 |
| 6 | -3.993167000 | 3.676503000  | 1.075350000  |
| 6 | -3.148215000 | 2.573436000  | 1.140068000  |
| 1 | -1.474717000 | 2.989830000  | -1.776226000 |
| 1 | -2.978487000 | 4.957785000  | -1.896930000 |
| 1 | -4.595021000 | 5.399005000  | -0.066683000 |
| 1 | -4.698478000 | 3.861639000  | 1.879326000  |
| 1 | -3.189478000 | 1.891655000  | 1.983146000  |
| 6 | -2.245949000 | -2.327224000 | 0.112006000  |
| 6 | -2.181610000 | -3.189635000 | -0.977299000 |
| 6 | -3.026296000 | -4.292643000 | -1.040682000 |
| 6 | -3.934436000 | -4.539675000 | -0.015039000 |
| 6 | -3.993099000 | -3.676645000 | 1.075249000  |
| 6 | -3.148208000 | -2.573534000 | 1.140005000  |

|    |              |              |              |
|----|--------------|--------------|--------------|
| 1  | -1.474326000 | -2.990026000 | -1.776056000 |
| 1  | -2.977986000 | -4.958063000 | -1.896826000 |
| 1  | -4.594733000 | -5.399243000 | -0.066756000 |
| 1  | -4.698503000 | -3.861764000 | 1.879146000  |
| 1  | -3.189613000 | -1.891699000 | 1.983032000  |
| 8  | 0.246981000  | -2.575517000 | 0.861246000  |
| 6  | 2.774152000  | -1.445949000 | -0.379399000 |
| 6  | 1.921634000  | 0.000169000  | 1.941826000  |
| 6  | 2.773973000  | 1.446062000  | -0.379643000 |
| 6  | 0.795596000  | -0.000188000 | -1.853640000 |
| 7  | 3.533629000  | 2.297906000  | -0.608315000 |
| 7  | 3.534006000  | -2.297644000 | -0.607970000 |
| 7  | 2.191465000  | 0.000298000  | 3.073355000  |
| 7  | 0.399360000  | -0.000324000 | -2.947715000 |
| 6  | -0.087530000 | -0.000288000 | -4.275548000 |
| 1  | 0.267322000  | -0.891424000 | -4.795743000 |
| 1  | -1.178646000 | 0.001432000  | -4.264114000 |
| 1  | 0.270127000  | 0.889142000  | -4.796739000 |
| 6  | 4.448033000  | 3.342740000  | -0.878552000 |
| 1  | 4.356113000  | 3.648526000  | -1.921925000 |
| 1  | 4.230987000  | 4.194898000  | -0.232504000 |
| 1  | 5.466140000  | 2.997468000  | -0.691876000 |
| 6  | 2.514789000  | 0.000164000  | 4.450193000  |
| 1  | 3.098874000  | -0.890072000 | 4.688713000  |
| 1  | 3.098594000  | 0.890523000  | 4.688942000  |
| 1  | 1.597659000  | -0.000054000 | 5.041282000  |
| 6  | 4.448843000  | -3.342124000 | -0.878137000 |
| 1  | 5.464658000  | -3.004774000 | -0.666166000 |
| 1  | 4.215651000  | -4.203980000 | -0.250853000 |
| 1  | 4.375741000  | -3.629915000 | -1.928100000 |
| 44 | 1.434416000  | -0.000003000 | 0.020749000  |

Cartesian coordinates for the optimized geometries of protonated complex **1a-6b**, along with their total energies (in hartrees) including zero point vibrational correction in aqueous phase.

**[1a-H]<sup>+</sup>**, TE = - 1869.934856

|   |              |              |              |
|---|--------------|--------------|--------------|
| 6 | -2.124009000 | 0.902136000  | -0.000197000 |
| 6 | -1.166700000 | -1.174538000 | 0.000242000  |
| 1 | -1.333472000 | -2.252710000 | 0.000451000  |
| 7 | -2.287520000 | -0.486507000 | 0.000085000  |
| 7 | -0.930241000 | 1.334111000  | -0.000290000 |
| 6 | -3.642219000 | -1.045898000 | 0.000151000  |
| 1 | -4.173820000 | -0.715096000 | -0.892586000 |
| 1 | -3.564173000 | -2.130521000 | 0.000435000  |
| 1 | -4.173925000 | -0.714635000 | 0.892652000  |
| 6 | -0.693064000 | 2.766236000  | -0.000578000 |

|    |              |              |              |
|----|--------------|--------------|--------------|
| 1  | -0.109132000 | 3.029346000  | 0.883880000  |
| 1  | -0.109075000 | 3.028977000  | -0.885107000 |
| 1  | -1.628462000 | 3.329556000  | -0.000730000 |
| 25 | 0.491262000  | -0.141295000 | 0.000035000  |
| 6  | 0.479202000  | -0.164169000 | 1.857838000  |
| 8  | 0.474114000  | -0.199457000 | 2.991658000  |
| 6  | 1.521355000  | -1.635277000 | 0.000380000  |
| 8  | 2.136261000  | -2.594664000 | 0.000627000  |
| 6  | 1.949933000  | 1.005099000  | -0.000220000 |
| 8  | 2.856365000  | 1.691072000  | -0.000382000 |
| 6  | 0.479229000  | -0.165020000 | -1.857758000 |
| 8  | 0.474184000  | -0.200851000 | -2.991561000 |
| 1  | -3.014922000 | 1.524004000  | -0.000308000 |

**[1b-H]<sup>+</sup>**, TE = -2003.730918

|    |              |              |              |
|----|--------------|--------------|--------------|
| 6  | -0.590997000 | 2.246015000  | -0.107179000 |
| 6  | -1.272962000 | 0.034790000  | 0.096535000  |
| 7  | -1.632148000 | 1.364274000  | 0.034299000  |
| 7  | 0.605561000  | 1.815834000  | -0.157480000 |
| 25 | 0.773274000  | -0.205675000 | 0.013672000  |
| 6  | 0.839117000  | -0.039616000 | 1.860509000  |
| 8  | 0.855229000  | 0.052103000  | 2.992554000  |
| 6  | 0.927080000  | -2.006806000 | 0.141939000  |
| 8  | 1.119487000  | -3.131784000 | 0.201056000  |
| 6  | 2.595475000  | -0.127466000 | -0.153674000 |
| 8  | 3.729978000  | -0.097605000 | -0.255758000 |
| 6  | 0.527326000  | -0.367344000 | -1.818007000 |
| 8  | 0.358696000  | -0.484690000 | -2.935080000 |
| 6  | 1.689499000  | 2.769166000  | -0.307752000 |
| 6  | -2.922430000 | 1.936667000  | 0.450925000  |
| 7  | -2.243964000 | -0.858159000 | 0.051651000  |
| 6  | -3.549763000 | -0.658497000 | -0.585336000 |
| 1  | -4.352625000 | -0.557859000 | 0.147751000  |
| 1  | -3.528499000 | 0.202250000  | -1.247301000 |
| 1  | -3.744794000 | -1.544721000 | -1.192589000 |
| 6  | -2.027068000 | -2.241963000 | 0.455032000  |
| 1  | -2.961802000 | -2.616653000 | 0.875841000  |
| 1  | -1.756487000 | -2.863998000 | -0.402890000 |
| 1  | -1.266899000 | -2.297181000 | 1.227729000  |
| 1  | -3.405696000 | 1.258602000  | 1.150967000  |
| 1  | -2.725427000 | 2.872008000  | 0.973497000  |
| 1  | -3.581108000 | 2.134376000  | -0.394367000 |
| 1  | 1.315103000  | 3.795126000  | -0.349714000 |
| 1  | 2.376900000  | 2.675851000  | 0.536371000  |
| 1  | 2.242206000  | 2.555334000  | -1.225458000 |
| 1  | -0.847641000 | 3.301221000  | -0.161060000 |

[1c-H]<sup>+</sup>, TE = -1984.358048

|    |              |              |              |
|----|--------------|--------------|--------------|
| 6  | 1.205365000  | -2.030948000 | 0.020846000  |
| 6  | 1.409519000  | 0.265572000  | -0.013398000 |
| 7  | 2.035732000  | -0.933962000 | 0.009682000  |
| 7  | -0.052263000 | -1.841153000 | 0.010530000  |
| 25 | -0.600077000 | 0.128909000  | -0.013724000 |
| 6  | -0.552927000 | 0.153465000  | 1.844601000  |
| 8  | -0.518194000 | 0.181851000  | 2.978148000  |
| 6  | -1.048173000 | 1.889091000  | -0.026321000 |
| 8  | -1.406555000 | 2.972418000  | -0.031617000 |
| 6  | -2.394011000 | -0.291933000 | -0.014950000 |
| 8  | -3.505507000 | -0.531971000 | -0.016846000 |
| 6  | -0.544256000 | 0.122490000  | -1.871714000 |
| 8  | -0.503828000 | 0.133018000  | -3.005432000 |
| 6  | -0.940951000 | -2.989300000 | 0.021445000  |
| 8  | 2.285023000  | 1.220181000  | -0.031756000 |
| 6  | 1.895305000  | 2.601164000  | -0.068336000 |
| 1  | 1.318275000  | 2.800755000  | -0.970346000 |
| 1  | 1.337110000  | 2.853803000  | 0.832136000  |
| 1  | 2.829076000  | 3.157264000  | -0.094342000 |
| 6  | 3.491971000  | -1.083622000 | 0.015077000  |
| 1  | 3.912995000  | -0.633222000 | -0.883495000 |
| 1  | 3.909722000  | -0.597087000 | 0.896092000  |
| 1  | 3.730478000  | -2.144868000 | 0.037121000  |
| 1  | -0.381039000 | -3.927216000 | 0.039246000  |
| 1  | -1.585800000 | -2.941079000 | 0.901788000  |
| 1  | -1.573420000 | -2.967542000 | -0.868907000 |
| 1  | 1.675018000  | -3.010638000 | 0.037045000  |

[1'a-H]<sup>+</sup>, TE = - 2252.937150

|    |              |              |              |
|----|--------------|--------------|--------------|
| 6  | 0.629802000  | 1.090116000  | 0.055941000  |
| 6  | 1.177909000  | -1.138045000 | 0.022517000  |
| 1  | 1.989589000  | -1.866918000 | 0.037472000  |
| 7  | 1.622558000  | 0.109901000  | 0.046576000  |
| 7  | -0.577519000 | 0.678640000  | 0.074913000  |
| 25 | -0.748234000 | -1.380318000 | 0.004197000  |
| 6  | -0.734986000 | -1.292131000 | -1.856005000 |
| 8  | -0.714567000 | -1.257856000 | -2.988742000 |
| 6  | -0.591078000 | -3.185323000 | -0.097125000 |
| 8  | -0.453091000 | -4.313819000 | -0.160891000 |
| 6  | -2.610075000 | -1.437582000 | -0.009698000 |

|   |              |              |              |
|---|--------------|--------------|--------------|
| 8 | -3.742997000 | -1.509916000 | -0.030834000 |
| 6 | -0.725239000 | -1.508142000 | 1.860205000  |
| 8 | -0.695628000 | -1.613235000 | 2.988805000  |
| 6 | -1.619189000 | 1.648846000  | 0.005490000  |
| 6 | -2.630566000 | 1.634624000  | 0.963202000  |
| 6 | -1.625705000 | 2.592937000  | -1.019551000 |
| 6 | -3.638869000 | 2.586929000  | 0.903832000  |
| 1 | -2.614467000 | 0.902986000  | 1.763159000  |
| 6 | -2.646236000 | 3.534851000  | -1.075153000 |
| 1 | -0.851790000 | 2.572852000  | -1.779671000 |
| 6 | -3.651144000 | 3.536089000  | -0.114612000 |
| 1 | -4.418094000 | 2.586040000  | 1.658184000  |
| 1 | -2.655428000 | 4.264540000  | -1.877501000 |
| 1 | -4.447047000 | 4.271371000  | -0.161513000 |
| 6 | 3.012091000  | 0.492259000  | 0.059729000  |
| 6 | 3.467598000  | 1.371796000  | 1.034051000  |
| 6 | 3.863245000  | -0.035686000 | -0.902453000 |
| 6 | 4.811210000  | 1.725817000  | 1.041037000  |
| 1 | 2.791159000  | 1.760854000  | 1.787599000  |
| 6 | 5.206092000  | 0.319742000  | -0.877641000 |
| 1 | 3.479174000  | -0.700797000 | -1.668253000 |
| 6 | 5.679509000  | 1.199950000  | 0.089802000  |
| 1 | 5.178983000  | 2.407712000  | 1.799556000  |
| 1 | 5.878986000  | -0.084387000 | -1.625650000 |
| 1 | 6.727446000  | 1.478928000  | 0.101208000  |
| 1 | 0.936105000  | 2.131337000  | 0.041939000  |

**[1'b-H]<sup>+</sup>**, TE = - 2386.738023

|    |              |              |              |
|----|--------------|--------------|--------------|
| 6  | 0.268283000  | -1.271752000 | -0.296066000 |
| 6  | 1.097910000  | 0.908624000  | -0.168747000 |
| 7  | 1.365117000  | -0.451593000 | -0.301722000 |
| 7  | -0.901621000 | -0.770220000 | -0.181679000 |
| 25 | -0.909495000 | 1.257986000  | 0.132313000  |
| 6  | -0.641640000 | 0.960799000  | 1.946386000  |
| 8  | -0.452964000 | 0.795420000  | 3.053578000  |



|   |              |              |              |
|---|--------------|--------------|--------------|
| 6 | -0.928148000 | 3.045612000  | 0.416565000  |
| 8 | -1.041212000 | 4.168375000  | 0.595086000  |
| 6 | -2.734470000 | 1.292303000  | 0.331713000  |
| 8 | -3.862145000 | 1.350349000  | 0.476808000  |
| 6 | -0.997558000 | 1.564196000  | -1.697858000 |
| 8 | -1.026905000 | 1.778071000  | -2.812653000 |
| 6 | -2.011689000 | -1.663245000 | -0.145799000 |
| 6 | -3.024834000 | -1.533316000 | -1.093176000 |
| 6 | -2.088862000 | -2.650240000 | 0.834862000  |
| 6 | -4.105944000 | -2.404521000 | -1.067135000 |
| 1 | -2.958473000 | -0.765362000 | -1.856122000 |
| 6 | -3.177234000 | -3.515961000 | 0.855202000  |
| 1 | -1.308483000 | -2.727771000 | 1.584920000  |
| 6 | -4.185984000 | -3.396656000 | -0.094007000 |
| 1 | -4.887722000 | -2.307786000 | -1.812906000 |
| 1 | -3.235840000 | -4.281466000 | 1.621624000  |
| 1 | -5.034853000 | -4.071593000 | -0.073868000 |
| 6 | 2.642086000  | -1.102658000 | -0.108281000 |
| 6 | 3.111901000  | -1.999301000 | -1.060551000 |
| 6 | 3.346348000  | -0.868345000 | 1.067262000  |
| 6 | 4.310717000  | -2.664938000 | -0.832395000 |
| 1 | 2.553347000  | -2.166109000 | -1.975734000 |
| 6 | 4.552027000  | -1.526968000 | 1.277236000  |
| 1 | 2.956463000  | -0.180891000 | 1.810232000  |
| 6 | 5.034418000  | -2.425253000 | 0.331024000  |
| 1 | 4.681580000  | -3.365710000 | -1.572309000 |
| 1 | 5.107840000  | -1.344195000 | 2.190376000  |
| 1 | 5.972722000  | -2.941620000 | 0.502190000  |
| 7 | 2.091641000  | 1.740014000  | -0.392328000 |
| 6 | 3.307332000  | 1.443291000  | -1.157568000 |
| 1 | 4.160723000  | 1.269764000  | -0.498751000 |
| 1 | 3.158225000  | 0.586769000  | -1.807826000 |
| 1 | 3.508719000  | 2.318045000  | -1.778165000 |
| 6 | 2.013707000  | 3.143239000  | 0.003338000  |
| 1 | 3.028572000  | 3.487640000  | 0.205575000  |

|   |             |              |              |
|---|-------------|--------------|--------------|
| 1 | 1.592392000 | 3.753266000  | -0.800159000 |
| 1 | 1.436419000 | 3.251084000  | 0.915913000  |
| 1 | 0.455384000 | -2.338291000 | -0.387296000 |

[1'**c-H**]<sup>+</sup>, TE = - 2367.360210

|    |              |              |              |
|----|--------------|--------------|--------------|
| 6  | 0.399520000  | -1.279539000 | -0.052414000 |
| 6  | 1.162100000  | 0.909034000  | 0.015095000  |
| 7  | 1.470161000  | -0.420247000 | -0.017562000 |
| 7  | -0.778936000 | -0.786487000 | -0.067093000 |
| 25 | -0.814551000 | 1.272022000  | 0.040422000  |
| 6  | -0.765304000 | 1.152253000  | 1.897999000  |
| 8  | -0.728430000 | 1.095134000  | 3.029770000  |
| 6  | -0.796535000 | 3.082861000  | 0.163255000  |
| 8  | -0.867738000 | 4.218386000  | 0.242989000  |
| 6  | -2.661349000 | 1.333914000  | 0.069237000  |
| 8  | -3.794399000 | 1.410359000  | 0.102919000  |
| 6  | -0.772105000 | 1.400386000  | -1.815180000 |
| 8  | -0.733653000 | 1.499419000  | -2.944462000 |
| 6  | -1.882648000 | -1.688973000 | -0.056087000 |
| 6  | -2.825308000 | -1.628561000 | -1.079755000 |
| 6  | -2.017518000 | -2.617058000 | 0.974082000  |
| 6  | -3.895535000 | -2.513097000 | -1.078196000 |
| 1  | -2.711370000 | -0.909626000 | -1.883578000 |
| 6  | -3.095521000 | -3.495727000 | 0.968731000  |
| 1  | -1.292460000 | -2.637423000 | 1.781085000  |
| 6  | -4.034483000 | -3.446836000 | -0.055146000 |
| 1  | -4.622064000 | -2.473059000 | -1.882564000 |
| 1  | -3.200918000 | -4.215528000 | 1.773332000  |
| 1  | -4.875556000 | -4.131661000 | -0.055028000 |
| 6  | 2.815926000  | -0.946860000 | -0.054167000 |
| 6  | 3.400437000  | -1.220028000 | -1.283633000 |
| 6  | 3.482902000  | -1.185016000 | 1.140037000  |
| 6  | 4.686245000  | -1.747495000 | -1.313949000 |
| 1  | 2.855789000  | -1.022539000 | -2.200585000 |
| 6  | 4.768638000  | -1.711232000 | 1.097404000  |
| 1  | 3.000718000  | -0.963288000 | 2.085784000  |
| 6  | 5.368427000  | -1.991760000 | -0.126360000 |
| 1  | 5.153071000  | -1.967736000 | -2.267640000 |
| 1  | 5.299967000  | -1.904089000 | 2.022851000  |
| 1  | 6.371587000  | -2.403507000 | -0.154474000 |
| 8  | 2.242140000  | 1.614245000  | 0.016238000  |
| 6  | 2.210880000  | 3.050871000  | 0.042022000  |
| 1  | 1.676021000  | 3.426216000  | -0.829097000 |
| 1  | 1.761224000  | 3.393835000  | 0.972772000  |
| 1  | 3.253576000  | 3.354795000  | -0.001926000 |

1 0.619654000 -2.342977000 -0.076379000

**[2a-H]<sup>+</sup>**, TE = - 1908.615761

6 -2.572871000 -0.958566000 -0.000060000

6 -1.578599000 1.098325000 -0.000192000

1 -1.746439000 2.178812000 -0.000313000

7 -2.723338000 0.423778000 -0.000202000

7 -1.378567000 -1.398394000 0.000069000

6 -4.066770000 1.001996000 -0.000348000

1 -4.609771000 0.684797000 0.891280000

1 -3.972738000 2.085882000 -0.000445000

1 -4.609653000 0.684627000 -0.891986000

6 -1.157952000 -2.830690000 0.000219000

1 -0.573881000 -3.101506000 -0.882245000

1 -0.573960000 -3.101335000 0.882786000

1 -2.097799000 -3.389143000 0.000231000

6 0.129195000 0.119392000 -1.836664000

8 0.211300000 0.190390000 -2.973862000

6 0.129044000 0.119760000 1.836660000

8 0.211048000 0.191044000 2.973848000

6 1.521438000 -1.162699000 0.000182000

7 2.415137000 -1.908039000 0.000234000

6 1.117903000 1.609478000 -0.000102000

7 1.746842000 2.590832000 -0.000104000

6 2.521276000 3.774090000 0.000058000

1 2.296659000 4.359566000 -0.893024000

1 2.287161000 4.365565000 0.886725000

1 3.582375000 3.518952000 0.006583000

6 3.497380000 -2.818653000 0.000233000

1 4.115749000 -2.650478000 -0.882727000

1 4.099402000 -2.669863000 0.897845000

1 3.115045000 -3.840544000 -0.014392000

25 0.044645000 0.069069000 -0.000001000

1 -3.467829000 -1.575372000 -0.000070000

[2b-H]<sup>+</sup>, TE = - 2042.406276

|    |              |              |              |
|----|--------------|--------------|--------------|
| 6  | -1.333753000 | -2.324744000 | -0.017973000 |
| 6  | -1.629805000 | -0.019761000 | 0.065002000  |
| 7  | -2.215765000 | -1.273608000 | 0.043973000  |
| 7  | -0.082994000 | -2.095433000 | -0.051237000 |
| 6  | 0.276241000  | 0.069611000  | -1.778943000 |
| 8  | 0.193287000  | 0.242938000  | -2.907797000 |
| 6  | 0.458424000  | -0.142789000 | 1.874287000  |
| 8  | 0.481074000  | -0.109100000 | 3.018492000  |
| 6  | 2.253513000  | -0.532641000 | -0.091313000 |
| 7  | 3.391034000  | -0.772915000 | -0.174799000 |
| 6  | 0.879100000  | 1.694469000  | 0.104134000  |
| 7  | 1.270386000  | 2.794870000  | 0.125746000  |
| 6  | 1.688673000  | 4.144253000  | 0.159299000  |
| 1  | 0.823529000  | 4.796170000  | 0.298429000  |
| 1  | 2.387012000  | 4.293980000  | 0.984689000  |
| 1  | 2.183791000  | 4.400804000  | -0.779000000 |
| 6  | 4.766896000  | -1.082147000 | -0.277071000 |
| 1  | 5.186096000  | -0.604518000 | -1.164208000 |
| 1  | 5.291611000  | -0.721256000 | 0.609067000  |
| 1  | 4.894454000  | -2.163287000 | -0.355647000 |
| 25 | 0.402789000  | -0.118900000 | 0.039586000  |
| 6  | 0.827913000  | -3.219856000 | -0.121464000 |
| 6  | -3.588842000 | -1.595737000 | 0.455019000  |
| 7  | -2.461637000 | 1.010542000  | -0.045878000 |
| 6  | -2.045581000 | 2.358408000  | 0.309965000  |
| 1  | -1.274293000 | 2.325137000  | 1.072563000  |
| 1  | -1.684385000 | 2.906217000  | -0.566228000 |
| 1  | -2.913823000 | 2.883077000  | 0.715445000  |
| 6  | -3.744712000 | 0.987944000  | -0.751181000 |
| 1  | -3.819081000 | 0.109961000  | -1.387583000 |
| 1  | -4.596408000 | 1.031996000  | -0.068131000 |
| 1  | -3.774708000 | 1.870221000  | -1.394789000 |
| 1  | -3.568015000 | -2.529423000 | 1.016444000  |
| 1  | -3.957786000 | -0.815386000 | 1.118214000  |

|   |              |              |              |
|---|--------------|--------------|--------------|
| 1 | -4.266132000 | -1.709995000 | -0.391857000 |
| 1 | 1.509300000  | -3.189726000 | 0.732231000  |
| 1 | 0.293463000  | -4.174491000 | -0.119862000 |
| 1 | 1.429202000  | -3.149758000 | -1.031221000 |
| 1 | -1.764021000 | -3.324195000 | -0.026973000 |

[2c-H]<sup>+</sup>, TE = - 2023.037777

|    |              |              |              |
|----|--------------|--------------|--------------|
| 6  | 1.904885000  | -1.983623000 | 0.000420000  |
| 6  | 1.747782000  | 0.317871000  | 0.000015000  |
| 7  | 2.559626000  | -0.774901000 | 0.000328000  |
| 7  | 0.632510000  | -1.977841000 | 0.000355000  |
| 6  | -0.212650000 | -0.029059000 | 1.836387000  |
| 8  | -0.240499000 | 0.062737000  | 2.975526000  |
| 6  | -0.212719000 | -0.029175000 | -1.835884000 |
| 8  | -0.240732000 | 0.062483000  | -2.975031000 |
| 6  | -1.957939000 | -0.831170000 | 0.000039000  |
| 7  | -3.038766000 | -1.262795000 | -0.000138000 |
| 6  | -0.932499000 | 1.622908000  | 0.000262000  |
| 7  | -1.474376000 | 2.656048000  | 0.000368000  |
| 6  | -2.087343000 | 3.929861000  | 0.000285000  |
| 1  | -1.320895000 | 4.707469000  | -0.012542000 |
| 1  | -2.720009000 | 4.033346000  | -0.882843000 |
| 1  | -2.699989000 | 4.043044000  | 0.896244000  |
| 6  | -4.346911000 | -1.800462000 | -0.001645000 |
| 1  | -4.804487000 | -1.651608000 | 0.977520000  |
| 1  | -4.947315000 | -1.299104000 | -0.762254000 |
| 1  | -4.302107000 | -2.868313000 | -0.221860000 |
| 25 | -0.190324000 | -0.104671000 | 0.000228000  |
| 6  | -0.070649000 | -3.244819000 | 0.000369000  |
| 6  | 4.019035000  | -0.705873000 | 0.000228000  |
| 8  | 2.493030000  | 1.391986000  | -0.000488000 |
| 6  | 1.899884000  | 2.694121000  | -0.001210000 |
| 1  | 1.296511000  | 2.831409000  | -0.897785000 |
| 1  | 1.297161000  | 2.832714000  | 0.895596000  |
| 1  | 2.737073000  | 3.388930000  | -0.002020000 |

|   |              |              |              |
|---|--------------|--------------|--------------|
| 1 | 4.413956000  | -1.720187000 | 0.000788000  |
| 1 | 4.369493000  | -0.181306000 | -0.888948000 |
| 1 | 4.369541000  | -0.180321000 | 0.888798000  |
| 1 | -0.711105000 | -3.305009000 | -0.882688000 |
| 1 | 0.621841000  | -4.091262000 | 0.000112000  |
| 1 | -0.710753000 | -3.305254000 | 0.883636000  |
| 1 | 2.516568000  | -2.882487000 | 0.000511000  |

**[2'a-H]<sup>+</sup>**, TE = - 2291.620781

|    |              |              |              |
|----|--------------|--------------|--------------|
| 6  | 0.992633000  | -1.308750000 | -0.110253000 |
| 6  | 1.298837000  | 0.960725000  | 0.016793000  |
| 1  | 2.044655000  | 1.757817000  | 0.072696000  |
| 7  | 1.880907000  | -0.246284000 | -0.048787000 |
| 7  | -0.251391000 | -1.011302000 | -0.105596000 |
| 6  | -0.640563000 | 0.962922000  | 1.874487000  |
| 8  | -0.664396000 | 0.977769000  | 3.014886000  |
| 6  | -0.669715000 | 1.266858000  | -1.794105000 |
| 8  | -0.706695000 | 1.476772000  | -2.915247000 |
| 6  | -2.527724000 | 0.856984000  | 0.052676000  |
| 7  | -3.686169000 | 0.763923000  | 0.075772000  |
| 6  | -0.608666000 | 2.891395000  | 0.184531000  |
| 7  | -0.565977000 | 4.051023000  | 0.282285000  |
| 6  | -0.527316000 | 5.459618000  | 0.404420000  |
| 1  | -0.017718000 | 5.732406000  | 1.329854000  |
| 1  | 0.011110000  | 5.885848000  | -0.443460000 |
| 1  | -1.544612000 | 5.853940000  | 0.422104000  |
| 6  | -5.092068000 | 0.612603000  | 0.092431000  |
| 1  | -5.450147000 | 0.654600000  | 1.121976000  |
| 1  | -5.552564000 | 1.415128000  | -0.485482000 |
| 1  | -5.357404000 | -0.351084000 | -0.345864000 |
| 25 | -0.604703000 | 1.019547000  | 0.031330000  |
| 6  | -1.186337000 | -2.082963000 | -0.120402000 |
| 6  | -2.169487000 | -2.124884000 | -1.107278000 |
| 6  | -1.127896000 | -3.077015000 | 0.855158000  |
| 6  | -3.076965000 | -3.175617000 | -1.127296000 |
| 1  | -2.208230000 | -1.347923000 | -1.862225000 |
| 6  | -2.047385000 | -4.120029000 | 0.832759000  |
| 1  | -0.379081000 | -3.019875000 | 1.638477000  |
| 6  | -3.021020000 | -4.173989000 | -0.157916000 |
| 1  | -3.831833000 | -3.213904000 | -1.905579000 |
| 1  | -2.002040000 | -4.888548000 | 1.597107000  |
| 1  | -3.737927000 | -4.987893000 | -0.173402000 |
| 6  | 3.297918000  | -0.481962000 | -0.065094000 |
| 6  | 3.853749000  | -1.392032000 | 0.827241000  |

|   |             |              |              |
|---|-------------|--------------|--------------|
| 6 | 4.089926000 | 0.214804000  | -0.970235000 |
| 6 | 5.226968000 | -1.605717000 | 0.807433000  |
| 1 | 3.226311000 | -1.914582000 | 1.541474000  |
| 6 | 5.462932000 | 0.001689000  | -0.972347000 |
| 1 | 3.634979000 | 0.904775000  | -1.672625000 |
| 6 | 6.031968000 | -0.908830000 | -0.087700000 |
| 1 | 5.667338000 | -2.311817000 | 1.502822000  |
| 1 | 6.086128000 | 0.541121000  | -1.677105000 |
| 1 | 7.103487000 | -1.076428000 | -0.096677000 |
| 1 | 1.393514000 | -2.314974000 | -0.181979000 |

**[2'b-H]<sup>+</sup>**, TE = - 2425.415121

|    |              |              |              |
|----|--------------|--------------|--------------|
| 6  | -0.801246000 | -1.431254000 | -0.142338000 |
| 6  | -1.193758000 | 0.873988000  | -0.118170000 |
| 7  | -1.721925000 | -0.416726000 | -0.209234000 |
| 7  | 0.439766000  | -1.155203000 | -0.013741000 |
| 6  | 0.851711000  | 0.949091000  | -1.802569000 |
| 8  | 0.859901000  | 1.066001000  | -2.940736000 |
| 6  | 0.754753000  | 0.958072000  | 1.863695000  |
| 8  | 0.691380000  | 1.079233000  | 3.000082000  |
| 6  | 2.710671000  | 0.538546000  | 0.046366000  |
| 7  | 3.861742000  | 0.360226000  | 0.040394000  |
| 6  | 1.228487000  | 2.694329000  | 0.009740000  |
| 7  | 1.573946000  | 3.809079000  | -0.018247000 |
| 6  | 1.942260000  | 5.173241000  | -0.047226000 |
| 1  | 1.048353000  | 5.798289000  | 0.005489000  |
| 1  | 2.588887000  | 5.398415000  | 0.802711000  |
| 1  | 2.478339000  | 5.390456000  | -0.972763000 |
| 6  | 5.246275000  | 0.075761000  | 0.048708000  |
| 1  | 5.650434000  | 0.185687000  | -0.958875000 |
| 1  | 5.759609000  | 0.765285000  | 0.720801000  |
| 1  | 5.403691000  | -0.948837000 | 0.391769000  |
| 25 | 0.835498000  | 0.860640000  | 0.030483000  |
| 6  | 1.352418000  | -2.243970000 | -0.000601000 |
| 6  | 2.214396000  | -2.410482000 | 1.082617000  |
| 6  | 1.395016000  | -3.138982000 | -1.068492000 |
| 6  | 3.100049000  | -3.479902000 | 1.100953000  |

|   |              |              |              |
|---|--------------|--------------|--------------|
| 1 | 2.177780000  | -1.709632000 | 1.909186000  |
| 6 | 2.288474000  | -4.205321000 | -1.044720000 |
| 1 | 0.740929000  | -2.987949000 | -1.921321000 |
| 6 | 3.141759000  | -4.379813000 | 0.038412000  |
| 1 | 3.760064000  | -3.611970000 | 1.952057000  |
| 1 | 2.317845000  | -4.896641000 | -1.880501000 |
| 1 | 3.839574000  | -5.210226000 | 0.055065000  |
| 6 | -3.091651000 | -0.815560000 | 0.018036000  |
| 6 | -3.739347000 | -1.613815000 | -0.918091000 |
| 6 | -3.720946000 | -0.453498000 | 1.204078000  |
| 6 | -5.036901000 | -2.044228000 | -0.667037000 |
| 1 | -3.236266000 | -1.884894000 | -1.840606000 |
| 6 | -5.024137000 | -0.876050000 | 1.439501000  |
| 1 | -3.195968000 | 0.153393000  | 1.934006000  |
| 6 | -5.683044000 | -1.671082000 | 0.507109000  |
| 1 | -5.544805000 | -2.665979000 | -1.396314000 |
| 1 | -5.519936000 | -0.590785000 | 2.361063000  |
| 1 | -6.698138000 | -2.002689000 | 0.697217000  |
| 7 | -2.047303000 | 1.868240000  | -0.303702000 |
| 6 | -1.712646000 | 3.229042000  | 0.092917000  |
| 1 | -0.971830000 | 3.219970000  | 0.885196000  |
| 1 | -1.346827000 | 3.808367000  | -0.759890000 |
| 1 | -2.622889000 | 3.700249000  | 0.470792000  |
| 6 | -3.318448000 | 1.801676000  | -1.027898000 |
| 1 | -3.346281000 | 0.939678000  | -1.688402000 |
| 1 | -4.172963000 | 1.774500000  | -0.347577000 |
| 1 | -3.383754000 | 2.704370000  | -1.639088000 |
| 1 | -1.192008000 | -2.444976000 | -0.175099000 |

**[2'**c**-H]<sup>+</sup>, TE = - 2406.042443**

|   |              |              |              |
|---|--------------|--------------|--------------|
| 6 | -0.890241000 | -1.443959000 | 0.068191000  |
| 6 | -1.262897000 | 0.846467000  | 0.035037000  |
| 7 | -1.800242000 | -0.418907000 | 0.044608000  |
| 7 | 0.353290000  | -1.148120000 | 0.093914000  |
| 6 | 0.687601000  | 0.874501000  | -1.829067000 |



|    |              |              |              |
|----|--------------|--------------|--------------|
| 8  | 0.677998000  | 0.918292000  | -2.970351000 |
| 6  | 0.751125000  | 1.073561000  | 1.841682000  |
| 8  | 0.777499000  | 1.244434000  | 2.971172000  |
| 6  | 2.605263000  | 0.614315000  | -0.026538000 |
| 7  | 3.758175000  | 0.466454000  | -0.063346000 |
| 6  | 1.015471000  | 2.738766000  | -0.098668000 |
| 7  | 1.297263000  | 3.867762000  | -0.171463000 |
| 6  | 1.597275000  | 5.246660000  | -0.258238000 |
| 1  | 0.670870000  | 5.822596000  | -0.304263000 |
| 1  | 2.169456000  | 5.553220000  | 0.618902000  |
| 1  | 2.185847000  | 5.438060000  | -1.156968000 |
| 6  | 5.151425000  | 0.227406000  | -0.092997000 |
| 1  | 5.527116000  | 0.379040000  | -1.105892000 |
| 1  | 5.655381000  | 0.914979000  | 0.587776000  |
| 1  | 5.347370000  | -0.800787000 | 0.217127000  |
| 25 | 0.710473000  | 0.887435000  | 0.011647000  |
| 6  | 1.285744000  | -2.220482000 | 0.059278000  |
| 6  | 2.236465000  | -2.342920000 | 1.071366000  |
| 6  | 1.257917000  | -3.139329000 | -0.988471000 |
| 6  | 3.142287000  | -3.395210000 | 1.040551000  |
| 1  | 2.252750000  | -1.624070000 | 1.883032000  |
| 6  | 2.172273000  | -4.187270000 | -1.014461000 |
| 1  | 0.533525000  | -3.020995000 | -1.787928000 |
| 6  | 3.114872000  | -4.319025000 | -0.001483000 |
| 1  | 3.872341000  | -3.494579000 | 1.837064000  |
| 1  | 2.147715000  | -4.897780000 | -1.834037000 |
| 1  | 3.828719000  | -5.135519000 | -0.023822000 |
| 6  | -3.212507000 | -0.710938000 | 0.046543000  |
| 6  | -3.882510000 | -0.830567000 | -1.164403000 |
| 6  | -3.872176000 | -0.882752000 | 1.256681000  |
| 6  | -5.240455000 | -1.128029000 | -1.160369000 |
| 1  | -3.344380000 | -0.692036000 | -2.095970000 |
| 6  | -5.230236000 | -1.180944000 | 1.250986000  |
| 1  | -3.326827000 | -0.783087000 | 2.189032000  |
| 6  | -5.913217000 | -1.303039000 | 0.045009000  |

|   |              |              |              |
|---|--------------|--------------|--------------|
| 1 | -5.771420000 | -1.225292000 | -2.101100000 |
| 1 | -5.753383000 | -1.318821000 | 2.191012000  |
| 1 | -6.972648000 | -1.536446000 | 0.044379000  |
| 8 | -2.235272000 | 1.712128000  | 0.041370000  |
| 6 | -1.969625000 | 3.119445000  | 0.036945000  |
| 1 | -1.376706000 | 3.391753000  | 0.909092000  |
| 1 | -1.459492000 | 3.398958000  | -0.883980000 |
| 1 | -2.948109000 | 3.592447000  | 0.083624000  |
| 1 | -1.284287000 | -2.456617000 | 0.072777000  |

**[3a-H]<sup>+</sup>**, TE = - 1947.284258

|    |              |              |              |
|----|--------------|--------------|--------------|
| 6  | 2.573542000  | 0.230124000  | -0.992128000 |
| 6  | 1.590929000  | 0.144777000  | 1.069670000  |
| 1  | 1.788865000  | 0.163681000  | 2.147431000  |
| 7  | 2.740990000  | 0.246568000  | 0.378536000  |
| 7  | 1.372767000  | 0.122125000  | -1.413300000 |
| 6  | 4.081135000  | 0.364321000  | 0.944680000  |
| 1  | 4.545371000  | 1.302826000  | 0.634926000  |
| 1  | 3.997123000  | 0.348815000  | 2.029895000  |
| 1  | 4.705899000  | -0.471317000 | 0.622418000  |
| 6  | 1.135585000  | 0.097034000  | -2.840262000 |
| 1  | 0.623289000  | -0.832046000 | -3.103366000 |
| 1  | 0.474277000  | 0.924448000  | -3.110332000 |
| 1  | 2.062896000  | 0.173054000  | -3.416927000 |
| 25 | -0.018504000 | -0.000077000 | 0.080517000  |
| 6  | -1.517191000 | -0.132704000 | -1.108742000 |
| 7  | -2.430251000 | -0.212928000 | -1.834833000 |
| 6  | -1.021346000 | -0.091451000 | 1.638010000  |
| 7  | -1.602514000 | -0.145474000 | 2.655734000  |
| 6  | -0.274688000 | 1.879386000  | 0.061402000  |
| 7  | -0.444775000 | 3.035719000  | 0.054368000  |
| 6  | 0.061649000  | -1.895345000 | 0.057090000  |
| 7  | 0.099569000  | -3.063427000 | 0.044955000  |
| 6  | 0.142678000  | -4.475858000 | 0.042440000  |
| 1  | 1.050621000  | -4.820712000 | 0.541078000  |

|   |              |              |              |
|---|--------------|--------------|--------------|
| 1 | -0.727082000 | -4.873435000 | 0.569114000  |
| 1 | 0.136874000  | -4.845094000 | -0.984885000 |
| 6 | -3.535440000 | -0.310776000 | -2.709987000 |
| 1 | -4.455495000 | -0.432430000 | -2.134695000 |
| 1 | -3.609662000 | 0.594771000  | -3.315200000 |
| 1 | -3.410218000 | -1.171509000 | -3.369751000 |
| 6 | -2.327793000 | -0.214307000 | 3.865698000  |
| 1 | -2.013751000 | -1.087736000 | 4.441422000  |
| 1 | -2.149098000 | 0.683696000  | 4.461174000  |
| 1 | -3.397360000 | -0.293768000 | 3.658153000  |
| 6 | -0.655542000 | 4.432997000  | 0.061867000  |
| 1 | -1.588198000 | 4.663529000  | 0.580523000  |
| 1 | 0.170310000  | 4.930587000  | 0.574025000  |
| 1 | -0.716303000 | 4.804492000  | -0.962865000 |
| 1 | 3.454837000  | 0.308109000  | -1.624888000 |

**[3b-H]<sup>+</sup>**, TE = - 2081.068898

|    |              |              |              |
|----|--------------|--------------|--------------|
| 6  | 1.283837000  | -1.329820000 | -1.956981000 |
| 6  | 1.619102000  | -0.261354000 | 0.082732000  |
| 7  | 2.181452000  | -0.938372000 | -0.993961000 |
| 7  | 0.052117000  | -1.042776000 | -1.814447000 |
| 25 | -0.382076000 | -0.048867000 | -0.083120000 |
| 6  | -2.190648000 | 0.115252000  | -0.567869000 |
| 7  | -3.321366000 | 0.230247000  | -0.858545000 |
| 6  | -0.774984000 | 0.859234000  | 1.481987000  |
| 7  | -1.123624000 | 1.450045000  | 2.438152000  |
| 6  | -0.006967000 | 1.609840000  | -0.903998000 |
| 7  | 0.225822000  | 2.648346000  | -1.394424000 |
| 6  | -0.729801000 | -1.692477000 | 0.789233000  |
| 7  | -0.943303000 | -2.705530000 | 1.337937000  |
| 6  | -1.194319000 | -3.919414000 | 2.015319000  |
| 1  | -0.952183000 | -3.812402000 | 3.074913000  |
| 1  | -2.247344000 | -4.191970000 | 1.917619000  |
| 1  | -0.580802000 | -4.716781000 | 1.590721000  |
| 6  | -4.678370000 | 0.354857000  | -1.228886000 |

|   |              |              |              |
|---|--------------|--------------|--------------|
| 1 | -5.296497000 | -0.303634000 | -0.614619000 |
| 1 | -5.012381000 | 1.385388000  | -1.089461000 |
| 1 | -4.805764000 | 0.081067000  | -2.278783000 |
| 6 | -1.418228000 | 2.141896000  | 3.632301000  |
| 1 | -0.513268000 | 2.258726000  | 4.235018000  |
| 1 | -1.819744000 | 3.132527000  | 3.406038000  |
| 1 | -2.159402000 | 1.589779000  | 4.215116000  |
| 6 | 0.497275000  | 3.909441000  | -1.970220000 |
| 1 | -0.364250000 | 4.250247000  | -2.548431000 |
| 1 | 0.709063000  | 4.639213000  | -1.185758000 |
| 1 | 1.363385000  | 3.839357000  | -2.631656000 |
| 6 | -0.875648000 | -1.460977000 | -2.842399000 |
| 6 | 3.490617000  | -1.599281000 | -1.010511000 |
| 7 | 2.509721000  | 0.255831000  | 0.937609000  |
| 6 | 2.111727000  | 0.655980000  | 2.275298000  |
| 1 | 2.944206000  | 0.453413000  | 2.954965000  |
| 1 | 1.876964000  | 1.725233000  | 2.322302000  |
| 1 | 1.249950000  | 0.077672000  | 2.593177000  |
| 6 | 3.838230000  | 0.745892000  | 0.575346000  |
| 1 | 4.641551000  | 0.114677000  | 0.965914000  |
| 1 | 3.933214000  | 0.838674000  | -0.504069000 |
| 1 | 3.950519000  | 1.744691000  | 1.006236000  |
| 1 | -0.378227000 | -2.017138000 | -3.644254000 |
| 1 | -1.650706000 | -2.091279000 | -2.398332000 |
| 1 | -1.369919000 | -0.585115000 | -3.271156000 |
| 1 | 3.804546000  | -1.799312000 | 0.013044000  |
| 1 | 3.390224000  | -2.556109000 | -1.523494000 |
| 1 | 4.257853000  | -1.010825000 | -1.516368000 |
| 1 | 1.684247000  | -1.883371000 | -2.805022000 |

**[3c-H]<sup>+</sup>**, TE = -2061.704141

|   |             |              |              |
|---|-------------|--------------|--------------|
| 6 | 1.907654000 | 0.009729000  | -1.996992000 |
| 6 | 1.750760000 | -0.001094000 | 0.306151000  |
| 7 | 2.568214000 | 0.003877000  | -0.793991000 |
| 7 | 0.634047000 | 0.010006000  | -1.977357000 |

|    |              |              |              |
|----|--------------|--------------|--------------|
| 25 | -0.170302000 | 0.000993000  | -0.090652000 |
| 6  | -1.935236000 | 0.003536000  | -0.781429000 |
| 7  | -3.029999000 | 0.004590000  | -1.195616000 |
| 6  | -0.868977000 | -0.007340000 | 1.628882000  |
| 7  | -1.398816000 | -0.012763000 | 2.677509000  |
| 6  | -0.198871000 | 1.894591000  | -0.058365000 |
| 7  | -0.224174000 | 3.064046000  | -0.026743000 |
| 6  | -0.198142000 | -1.892767000 | -0.076235000 |
| 7  | -0.223047000 | -3.062480000 | -0.055626000 |
| 6  | -0.253722000 | -4.474323000 | -0.009284000 |
| 1  | 0.259354000  | -4.828581000 | 0.887187000  |
| 1  | -1.287951000 | -4.823822000 | 0.009959000  |
| 1  | 0.244241000  | -4.885376000 | -0.889680000 |
| 6  | -4.343960000 | 0.004188000  | -1.714763000 |
| 1  | -4.964340000 | -0.700698000 | -1.157545000 |
| 1  | -4.777410000 | 1.002879000  | -1.631547000 |
| 1  | -4.327873000 | -0.290293000 | -2.766299000 |
| 6  | -1.939911000 | -0.018581000 | 3.981331000  |
| 1  | -2.555306000 | -0.908947000 | 4.128971000  |
| 1  | -1.136434000 | -0.018176000 | 4.722642000  |
| 1  | -2.561238000 | 0.866739000  | 4.134407000  |
| 6  | -0.256038000 | 4.475547000  | 0.028059000  |
| 1  | -0.317496000 | 4.805154000  | 1.067250000  |
| 1  | 0.650343000  | 4.885570000  | -0.421852000 |
| 1  | -1.125105000 | 4.850356000  | -0.516407000 |
| 6  | -0.077102000 | 0.016483000  | -3.236994000 |
| 6  | 4.025767000  | 0.002634000  | -0.735729000 |
| 8  | 2.526862000  | -0.006621000 | 1.374112000  |
| 6  | 1.944081000  | -0.013691000 | 2.675494000  |
| 1  | 1.337203000  | -0.908334000 | 2.814596000  |
| 1  | 2.783662000  | -0.017573000 | 3.368947000  |
| 1  | 1.337317000  | 0.879431000  | 2.824503000  |
| 1  | 4.414912000  | 0.008050000  | -1.752895000 |
| 1  | 4.385955000  | 0.887227000  | -0.208832000 |
| 1  | 4.384835000  | -0.888223000 | -0.218686000 |

|   |              |              |              |
|---|--------------|--------------|--------------|
| 1 | -0.719940000 | 0.899156000  | -3.288109000 |
| 1 | 0.604534000  | 0.020036000  | -4.093860000 |
| 1 | -0.721301000 | -0.864706000 | -3.296424000 |
| 1 | 2.513298000  | 0.013876000  | -2.900901000 |

[3'a-H]<sup>+</sup>, TE = - 2330.292849

|    |              |              |              |
|----|--------------|--------------|--------------|
| 6  | -1.078780000 | -1.366732000 | -0.192360000 |
| 6  | -1.324195000 | 0.904024000  | 0.052652000  |
| 1  | -2.069614000 | 1.699916000  | 0.150197000  |
| 7  | -1.943332000 | -0.302899000 | -0.080242000 |
| 7  | 0.174288000  | -1.087652000 | -0.160193000 |
| 25 | 0.546968000  | 0.933743000  | 0.091657000  |
| 6  | 2.468844000  | 0.765655000  | 0.145901000  |
| 7  | 3.631046000  | 0.668272000  | 0.190502000  |
| 6  | 0.536392000  | 2.773863000  | 0.327295000  |
| 7  | 0.469468000  | 3.934435000  | 0.472634000  |
| 6  | 0.599538000  | 0.724579000  | 1.982031000  |
| 7  | 0.640422000  | 0.609714000  | 3.142613000  |
| 6  | 0.710323000  | 1.218484000  | -1.782411000 |
| 7  | 0.816230000  | 1.411993000  | -2.928680000 |
| 6  | 0.928914000  | 1.651158000  | -4.317195000 |
| 1  | -0.063662000 | 1.788730000  | -4.750149000 |
| 1  | 1.523435000  | 2.550218000  | -4.489558000 |
| 1  | 1.416061000  | 0.801742000  | -4.799596000 |
| 6  | 5.034290000  | 0.506142000  | 0.231765000  |
| 1  | 5.515729000  | 1.302108000  | -0.339165000 |
| 1  | 5.379354000  | 0.547979000  | 1.266324000  |
| 1  | 5.305093000  | -0.460298000 | -0.198485000 |
| 6  | 0.416445000  | 5.335314000  | 0.647923000  |
| 1  | -0.112985000 | 5.796347000  | -0.188510000 |
| 1  | -0.108077000 | 5.575688000  | 1.575038000  |
| 1  | 1.428055000  | 5.744111000  | 0.696269000  |
| 6  | 0.687365000  | 0.481405000  | 4.549476000  |
| 1  | 1.155139000  | 1.366529000  | 4.984561000  |
| 1  | -0.324772000 | 0.379434000  | 4.945202000  |

|   |              |              |              |
|---|--------------|--------------|--------------|
| 1 | 1.269566000  | -0.401220000 | 4.820393000  |
| 6 | 1.088609000  | -2.168187000 | -0.242819000 |
| 6 | 2.101561000  | -2.137934000 | -1.201697000 |
| 6 | 0.996160000  | -3.250176000 | 0.633655000  |
| 6 | 2.998925000  | -3.193367000 | -1.294187000 |
| 1 | 2.168354000  | -1.292353000 | -1.876585000 |
| 6 | 1.904188000  | -4.300020000 | 0.539832000  |
| 1 | 0.225998000  | -3.257284000 | 1.398439000  |
| 6 | 2.905902000  | -4.277096000 | -0.423890000 |
| 1 | 3.775954000  | -3.169264000 | -2.051371000 |
| 1 | 1.828559000  | -5.134864000 | 1.228949000  |
| 1 | 3.614256000  | -5.095735000 | -0.494448000 |
| 6 | -3.359015000 | -0.503706000 | -0.117417000 |
| 6 | -3.943700000 | -1.493680000 | 0.667559000  |
| 6 | -4.141472000 | 0.306288000  | -0.935357000 |
| 6 | -5.321377000 | -1.675060000 | 0.624632000  |
| 1 | -3.331644000 | -2.105816000 | 1.321596000  |
| 6 | -5.518987000 | 0.126991000  | -0.959238000 |
| 1 | -3.672433000 | 1.060697000  | -1.557773000 |
| 6 | -6.111616000 | -0.864959000 | -0.184019000 |
| 1 | -5.777291000 | -2.445001000 | 1.237782000  |
| 1 | -6.128460000 | 0.757542000  | -1.597690000 |
| 1 | -7.186731000 | -1.006130000 | -0.210095000 |
| 1 | -1.490808000 | -2.361613000 | -0.331977000 |

**[3'b-H]<sup>+</sup>**, TE = - 2464.079720

|    |              |              |              |
|----|--------------|--------------|--------------|
| 6  | -0.871130000 | 1.491127000  | -0.142319000 |
| 6  | -1.213612000 | -0.824621000 | -0.104837000 |
| 7  | -1.772953000 | 0.460933000  | -0.211150000 |
| 7  | 0.374435000  | 1.230399000  | -0.012709000 |
| 25 | 0.794182000  | -0.789935000 | 0.037025000  |
| 6  | 2.650710000  | -0.480322000 | -0.000811000 |
| 7  | 3.810522000  | -0.316347000 | -0.041798000 |
| 6  | 1.170446000  | -2.602480000 | 0.028694000  |
| 7  | 1.515991000  | -3.726043000 | 0.008167000  |
| 6  | 0.789157000  | -0.841127000 | -1.853865000 |
| 7  | 0.790369000  | -0.899936000 | -3.023275000 |
| 6  | 0.788679000  | -0.813112000 | 1.932473000  |

|   |              |              |              |
|---|--------------|--------------|--------------|
| 7 | 0.786770000  | -0.851737000 | 3.103065000  |
| 6 | 0.766493000  | -0.909228000 | 4.514425000  |
| 1 | 1.288662000  | -1.804807000 | 4.857556000  |
| 1 | 1.260998000  | -0.029020000 | 4.930673000  |
| 1 | -0.264944000 | -0.940054000 | 4.872033000  |
| 6 | 5.191274000  | -0.021999000 | -0.065622000 |
| 1 | 5.730275000  | -0.698874000 | 0.600662000  |
| 1 | 5.581801000  | -0.137503000 | -1.078938000 |
| 1 | 5.355700000  | 1.007001000  | 0.263703000  |
| 6 | 1.827209000  | -5.102590000 | -0.003454000 |
| 1 | 0.912432000  | -5.697217000 | 0.067665000  |
| 1 | 2.345517000  | -5.363921000 | -0.928973000 |
| 1 | 2.473934000  | -5.349516000 | 0.841747000  |
| 6 | 0.807100000  | -0.987893000 | -4.433359000 |
| 1 | 1.836090000  | -0.952817000 | -4.797203000 |
| 1 | 0.348071000  | -1.925762000 | -4.753101000 |
| 1 | 0.248802000  | -0.154556000 | -4.864734000 |
| 6 | 1.267678000  | 2.329595000  | 0.002897000  |
| 6 | 2.186733000  | 2.457919000  | 1.045456000  |
| 6 | 1.248103000  | 3.278547000  | -1.020187000 |
| 6 | 3.059378000  | 3.537692000  | 1.071188000  |
| 1 | 2.201794000  | 1.711567000  | 1.831699000  |
| 6 | 2.128971000  | 4.355393000  | -0.990317000 |
| 1 | 0.555456000  | 3.159911000  | -1.847512000 |
| 6 | 3.035678000  | 4.490335000  | 0.054477000  |
| 1 | 3.762694000  | 3.636554000  | 1.891906000  |
| 1 | 2.108004000  | 5.085675000  | -1.792838000 |
| 1 | 3.724171000  | 5.328521000  | 0.075780000  |
| 6 | -3.147237000 | 0.830733000  | 0.015619000  |
| 6 | -3.801898000 | 1.649761000  | -0.898844000 |
| 6 | -3.787483000 | 0.419719000  | 1.180839000  |
| 6 | -5.108617000 | 2.052635000  | -0.647887000 |
| 1 | -3.294969000 | 1.958880000  | -1.807323000 |
| 6 | -5.099324000 | 0.813931000  | 1.416594000  |
| 1 | -3.261405000 | -0.205009000 | 1.894672000  |
| 6 | -5.761837000 | 1.630856000  | 0.505517000  |
| 1 | -5.618336000 | 2.690613000  | -1.361988000 |
| 1 | -5.600132000 | 0.489495000  | 2.322572000  |
| 1 | -6.783975000 | 1.940269000  | 0.695723000  |
| 7 | -2.074199000 | -1.822931000 | -0.301851000 |
| 6 | -1.753527000 | -3.173921000 | 0.126812000  |
| 1 | -2.668657000 | -3.633543000 | 0.510577000  |
| 1 | -1.384051000 | -3.779611000 | -0.707178000 |
| 1 | -1.012865000 | -3.147038000 | 0.919552000  |
| 6 | -3.305463000 | -1.769616000 | -1.087716000 |
| 1 | -4.197788000 | -1.766256000 | -0.455595000 |



|   |              |              |              |
|---|--------------|--------------|--------------|
| 1 | -3.317019000 | -0.898033000 | -1.736964000 |
| 1 | -3.326999000 | -2.663552000 | -1.716561000 |
| 1 | -1.279222000 | 2.498615000  | -0.171003000 |

[3'**c-H**]<sup>+</sup>, TE = - 2444.710898

|    |              |              |              |
|----|--------------|--------------|--------------|
| 6  | -0.975390000 | -1.485069000 | -0.074876000 |
| 6  | -1.275253000 | 0.818559000  | -0.038529000 |
| 7  | -1.858508000 | -0.440985000 | -0.037931000 |
| 7  | 0.275363000  | -1.213734000 | -0.111593000 |
| 25 | 0.670307000  | 0.819017000  | 0.013031000  |
| 6  | 2.548533000  | 0.528144000  | 0.065959000  |
| 7  | 3.705980000  | 0.369961000  | 0.111013000  |
| 6  | 0.986481000  | 2.640306000  | 0.182917000  |
| 7  | 1.284289000  | 3.769522000  | 0.300371000  |
| 6  | 0.641104000  | 0.697142000  | 1.906809000  |
| 7  | 0.628708000  | 0.636968000  | 3.074128000  |
| 6  | 0.764363000  | 1.005119000  | -1.871876000 |
| 7  | 0.827557000  | 1.141112000  | -3.031725000 |
| 6  | 0.893968000  | 1.315469000  | -4.432426000 |
| 1  | 1.504207000  | 2.189541000  | -4.668282000 |
| 1  | 1.341133000  | 0.433514000  | -4.895316000 |
| 1  | -0.109665000 | 1.460924000  | -4.837011000 |
| 6  | 5.092179000  | 0.100347000  | 0.146788000  |
| 1  | 5.621838000  | 0.783572000  | -0.519892000 |
| 1  | 5.469817000  | 0.228973000  | 1.162957000  |
| 1  | 5.274162000  | -0.927613000 | -0.175121000 |
| 6  | 1.552091000  | 5.148905000  | 0.438276000  |
| 1  | 2.193958000  | 5.489546000  | -0.377134000 |
| 1  | 0.618574000  | 5.717003000  | 0.414743000  |
| 1  | 2.057709000  | 5.339318000  | 1.387517000  |
| 6  | 0.617192000  | 0.574562000  | 4.485939000  |
| 1  | 1.126851000  | 1.447435000  | 4.898584000  |
| 1  | -0.412263000 | 0.557198000  | 4.848938000  |
| 1  | 1.129807000  | -0.329225000 | 4.821100000  |
| 6  | 1.182154000  | -2.302409000 | -0.092446000 |
| 6  | 2.157842000  | -2.403463000 | -1.084923000 |
| 6  | 1.119436000  | -3.263363000 | 0.916982000  |
| 6  | 3.046513000  | -3.470527000 | -1.075502000 |
| 1  | 2.204069000  | -1.648641000 | -1.862058000 |
| 6  | 2.016862000  | -4.326614000 | 0.922955000  |
| 1  | 0.380065000  | -3.164888000 | 1.705555000  |
| 6  | 2.980976000  | -4.435351000 | -0.072446000 |
| 1  | 3.794638000  | -3.549701000 | -1.857737000 |
| 1  | 1.962952000  | -5.067436000 | 1.714109000  |
| 1  | 3.681730000  | -5.263525000 | -0.065855000 |
| 6  | -3.271059000 | -0.705765000 | -0.070995000 |

|   |              |              |              |
|---|--------------|--------------|--------------|
| 6 | -4.041792000 | -0.478557000 | 1.064079000  |
| 6 | -3.844392000 | -1.209868000 | -1.232439000 |
| 6 | -5.402614000 | -0.756322000 | 1.030700000  |
| 1 | -3.575495000 | -0.091135000 | 1.963242000  |
| 6 | -5.206026000 | -1.494412000 | -1.255294000 |
| 1 | -3.228648000 | -1.375279000 | -2.110426000 |
| 6 | -5.985460000 | -1.265388000 | -0.126740000 |
| 1 | -6.007636000 | -0.581311000 | 1.913922000  |
| 1 | -5.656123000 | -1.891473000 | -2.158851000 |
| 1 | -7.047665000 | -1.485056000 | -0.147268000 |
| 8 | -2.247436000 | 1.702082000  | -0.091933000 |
| 6 | -1.944734000 | 3.096139000  | -0.129238000 |
| 1 | -1.284352000 | 3.317934000  | -0.967226000 |
| 1 | -2.903370000 | 3.595443000  | -0.260028000 |
| 1 | -1.484258000 | 3.406611000  | 0.808562000  |
| 1 | -1.391790000 | -2.489203000 | -0.079220000 |

[4'a-H]<sup>+</sup>, TE = - 2443.624063

|   |              |              |              |
|---|--------------|--------------|--------------|
| 6 | 1.079945000  | -1.213034000 | -0.271893000 |
| 6 | 1.312254000  | 1.162355000  | -0.209742000 |
| 1 | 1.543061000  | 1.656113000  | -1.160305000 |
| 7 | -0.202500000 | -1.023986000 | -0.197303000 |
| 1 | 1.801215000  | 1.740433000  | 0.581568000  |
| 6 | -0.842739000 | 2.744542000  | 0.289494000  |
| 6 | -0.320123000 | 0.704393000  | 1.892976000  |
| 6 | -0.917194000 | 1.112701000  | -1.787322000 |
| 7 | -0.897943000 | 3.899304000  | 0.422891000  |
| 7 | -1.020109000 | 1.236387000  | -2.938660000 |
| 7 | -0.061521000 | 0.566164000  | 3.017536000  |
| 6 | 0.249005000  | 0.396915000  | 4.387640000  |
| 1 | 1.058453000  | -0.327102000 | 4.491192000  |
| 1 | 0.562245000  | 1.352503000  | 4.810615000  |
| 1 | -0.631688000 | 0.035404000  | 4.920422000  |
| 6 | -0.967019000 | 5.302600000  | 0.587067000  |
| 1 | -0.505535000 | 5.583124000  | 1.535140000  |
| 1 | -0.437831000 | 5.793713000  | -0.231023000 |
| 1 | -2.010592000 | 5.621274000  | 0.585102000  |
| 6 | -1.145354000 | 1.377920000  | -4.340978000 |
| 1 | -0.155071000 | 1.468628000  | -4.789517000 |
| 1 | -1.650857000 | 0.502659000  | -4.751800000 |
| 1 | -1.729002000 | 2.271681000  | -4.566198000 |
| 6 | -1.041186000 | -2.158902000 | -0.221339000 |
| 6 | -2.162674000 | -2.179273000 | -1.054866000 |
| 6 | -0.779900000 | -3.266724000 | 0.591539000  |
| 6 | -2.992601000 | -3.292313000 | -1.086525000 |
| 1 | -2.370074000 | -1.322047000 | -1.685263000 |

|    |              |              |              |
|----|--------------|--------------|--------------|
| 6  | -1.612460000 | -4.379953000 | 0.552206000  |
| 1  | 0.066306000  | -3.245731000 | 1.271244000  |
| 6  | -2.721681000 | -4.399554000 | -0.286259000 |
| 1  | -3.854789000 | -3.296343000 | -1.745939000 |
| 1  | -1.396843000 | -5.230236000 | 1.191434000  |
| 1  | -3.373979000 | -5.266048000 | -0.311544000 |
| 26 | -0.691469000 | 0.922086000  | 0.066182000  |
| 6  | -2.529550000 | 0.641551000  | 0.357016000  |
| 7  | -3.666510000 | 0.500179000  | 0.559469000  |
| 6  | -5.045583000 | 0.285073000  | 0.786921000  |
| 1  | -5.625520000 | 1.060060000  | 0.283489000  |
| 1  | -5.329485000 | -0.692873000 | 0.393847000  |
| 1  | -5.250309000 | 0.318151000  | 1.858049000  |
| 7  | 1.923055000  | -0.178469000 | -0.221922000 |
| 6  | 3.323026000  | -0.364761000 | -0.229543000 |
| 6  | 4.152157000  | 0.644769000  | -0.726197000 |
| 6  | 3.906214000  | -1.530151000 | 0.282921000  |
| 6  | 5.531653000  | 0.476343000  | -0.736790000 |
| 1  | 3.717184000  | 1.559231000  | -1.110432000 |
| 6  | 5.285011000  | -1.692379000 | 0.255966000  |
| 1  | 3.292062000  | -2.303816000 | 0.729802000  |
| 6  | 6.108258000  | -0.693468000 | -0.254800000 |
| 1  | 6.158137000  | 1.270242000  | -1.130628000 |
| 1  | 5.717769000  | -2.602631000 | 0.658386000  |
| 1  | 7.185271000  | -0.821040000 | -0.264587000 |
| 1  | 1.498072000  | -2.207159000 | -0.409564000 |

[4'b-H]<sup>+</sup>, TE = -5591.117290

|   |              |              |              |
|---|--------------|--------------|--------------|
| 6 | -1.301345000 | 1.203741000  | -0.255021000 |
| 6 | -1.346649000 | -1.202918000 | -0.229731000 |
| 1 | -1.549894000 | -1.692875000 | -1.187879000 |
| 7 | -0.003219000 | 1.153634000  | -0.179876000 |
| 1 | -1.800467000 | -1.821463000 | 0.551142000  |
| 6 | 1.111992000  | -2.716963000 | 0.257070000  |
| 6 | 0.353744000  | -0.683783000 | 1.995826000  |
| 6 | 0.974248000  | -0.985988000 | -1.910138000 |
| 7 | 1.299849000  | -3.861311000 | 0.373402000  |
| 7 | 1.077742000  | -1.085577000 | -3.063721000 |
| 7 | 0.097046000  | -0.598955000 | 3.126077000  |
| 6 | -0.207845000 | -0.498694000 | 4.504028000  |
| 1 | -1.146519000 | 0.042518000  | 4.630804000  |
| 1 | -0.306129000 | -1.499147000 | 4.927864000  |
| 1 | 0.592584000  | 0.036345000  | 5.017067000  |
| 6 | 1.528214000  | -5.249359000 | 0.516447000  |
| 1 | 0.761627000  | -5.683631000 | 1.160490000  |
| 1 | 1.490073000  | -5.730379000 | -0.462423000 |

|    |              |              |              |
|----|--------------|--------------|--------------|
| 1  | 2.510326000  | -5.417208000 | 0.961872000  |
| 6  | 1.213066000  | -1.206290000 | -4.466870000 |
| 1  | 0.770037000  | -2.147450000 | -4.795726000 |
| 1  | 0.701462000  | -0.375099000 | -4.954239000 |
| 1  | 2.270624000  | -1.188899000 | -4.734362000 |
| 6  | 0.710558000  | 2.372905000  | -0.198834000 |
| 6  | 1.837926000  | 2.500320000  | -1.013478000 |
| 6  | 0.321663000  | 3.453459000  | 0.598934000  |
| 6  | 2.548837000  | 3.692788000  | -1.044327000 |
| 1  | 2.142604000  | 1.661859000  | -1.629425000 |
| 6  | 1.035578000  | 4.646429000  | 0.559988000  |
| 1  | -0.528290000 | 3.351123000  | 1.266357000  |
| 6  | 2.150902000  | 4.773200000  | -0.260848000 |
| 1  | 3.417625000  | 3.779620000  | -1.689094000 |
| 1  | 0.723078000  | 5.475301000  | 1.187114000  |
| 1  | 2.710473000  | 5.702256000  | -0.284603000 |
| 6  | 2.658085000  | -0.357810000 | 0.340934000  |
| 7  | 3.775712000  | -0.088015000 | 0.526567000  |
| 6  | 5.128758000  | 0.262149000  | 0.742112000  |
| 1  | 5.778130000  | -0.508232000 | 0.323185000  |
| 1  | 5.340696000  | 1.216634000  | 0.256963000  |
| 1  | 5.318314000  | 0.351305000  | 1.812957000  |
| 7  | -2.046790000 | 0.097514000  | -0.220629000 |
| 6  | -3.459714000 | 0.175761000  | -0.223678000 |
| 6  | -4.210428000 | -0.855877000 | -0.792183000 |
| 6  | -4.125174000 | 1.257538000  | 0.364083000  |
| 6  | -5.598444000 | -0.787865000 | -0.798364000 |
| 1  | -3.709983000 | -1.707542000 | -1.236193000 |
| 6  | -5.512200000 | 1.321441000  | 0.340549000  |
| 1  | -3.565741000 | 2.039914000  | 0.864888000  |
| 6  | -6.258792000 | 0.301783000  | -0.241291000 |
| 1  | -6.165626000 | -1.595849000 | -1.249085000 |
| 1  | -6.010693000 | 2.168335000  | 0.800819000  |
| 1  | -7.342234000 | 0.350772000  | -0.249029000 |
| 44 | 0.743045000  | -0.835863000 | 0.055638000  |
| 1  | -1.816333000 | 2.152938000  | -0.381529000 |

**[5a-H]<sup>+</sup>**, TE = -2482.816831

|   |              |              |              |
|---|--------------|--------------|--------------|
| 6 | 0.293388000  | 1.369628000  | -0.870968000 |
| 6 | -1.729950000 | 0.001777000  | -0.544166000 |
| 6 | 0.294313000  | -1.363383000 | -0.875871000 |
| 7 | -1.145626000 | -1.177534000 | -0.626171000 |
| 7 | -1.147037000 | 1.182138000  | -0.623850000 |
| 6 | -1.976783000 | -2.331299000 | -0.482257000 |
| 6 | -1.833935000 | -3.392700000 | -1.375309000 |
| 6 | -2.909450000 | -2.410586000 | 0.550297000  |

|    |              |              |              |
|----|--------------|--------------|--------------|
| 6  | -2.635104000 | -4.518783000 | -1.241362000 |
| 1  | -1.104784000 | -3.328135000 | -2.174821000 |
| 6  | -3.714304000 | -3.538434000 | 0.670978000  |
| 1  | -2.992485000 | -1.604027000 | 1.271090000  |
| 6  | -3.580259000 | -4.595540000 | -0.221795000 |
| 1  | -2.524504000 | -5.338190000 | -1.943922000 |
| 1  | -4.435886000 | -3.594077000 | 1.479261000  |
| 1  | -4.203273000 | -5.477706000 | -0.120504000 |
| 6  | -1.979855000 | 2.334816000  | -0.480913000 |
| 6  | -1.827080000 | 3.402440000  | -1.364944000 |
| 6  | -2.924407000 | 2.407701000  | 0.541481000  |
| 6  | -2.629146000 | 4.528063000  | -1.232109000 |
| 1  | -1.089366000 | 3.343369000  | -2.156938000 |
| 6  | -3.729921000 | 3.535118000  | 0.660969000  |
| 1  | -3.017343000 | 1.596295000  | 1.255535000  |
| 6  | -3.585417000 | 4.598565000  | -0.222627000 |
| 1  | -2.510127000 | 5.352163000  | -1.927775000 |
| 1  | -4.460499000 | 3.585311000  | 1.461496000  |
| 1  | -4.208951000 | 5.480427000  | -0.121968000 |
| 1  | 0.436048000  | -1.331464000 | -1.961797000 |
| 1  | 0.506083000  | -2.384829000 | -0.555031000 |
| 1  | 0.504335000  | 2.389552000  | -0.544804000 |
| 1  | 0.436387000  | 1.343252000  | -1.956882000 |
| 26 | 1.532270000  | 0.001831000  | 0.023877000  |
| 6  | 0.487301000  | 0.001194000  | 1.559413000  |
| 7  | -0.136751000 | 0.002210000  | 2.544727000  |
| 6  | 2.564837000  | 1.375096000  | 0.720144000  |
| 7  | 3.195917000  | 2.261001000  | 1.144372000  |
| 6  | 2.535490000  | 0.004441000  | -1.540667000 |
| 7  | 3.142480000  | 0.006374000  | -2.535837000 |
| 6  | 2.563713000  | -1.374342000 | 0.715956000  |
| 7  | 3.193394000  | -2.262749000 | 1.137030000  |
| 6  | 3.967005000  | 3.327469000  | 1.661516000  |
| 1  | 4.422598000  | 3.029794000  | 2.607738000  |
| 1  | 4.753982000  | 3.591065000  | 0.952642000  |
| 1  | 3.329797000  | 4.197730000  | 1.828703000  |
| 6  | -0.867168000 | 0.004429000  | 3.755557000  |
| 1  | -0.176881000 | 0.034172000  | 4.600562000  |
| 1  | -1.517672000 | 0.880027000  | 3.793480000  |
| 1  | -1.475931000 | -0.899040000 | 3.822014000  |
| 6  | 3.962176000  | -3.332988000 | 1.649825000  |
| 1  | 4.748694000  | -3.595268000 | 0.939954000  |
| 1  | 4.418254000  | -3.040265000 | 2.597349000  |
| 1  | 3.323094000  | -4.202593000 | 1.813253000  |
| 6  | 3.888756000  | 0.008845000  | -3.737313000 |
| 1  | 4.470725000  | -0.911408000 | -3.811285000 |

|   |              |             |              |
|---|--------------|-------------|--------------|
| 1 | 3.211973000  | 0.075565000 | -4.590699000 |
| 1 | 4.566169000  | 0.864447000 | -3.748109000 |
| 1 | -2.807025000 | 0.000687000 | -0.426246000 |

**[5b-H]<sup>+</sup>**, TE = - 5630.312530

|   |              |              |              |
|---|--------------|--------------|--------------|
| 6 | 0.132102000  | 1.412413000  | -0.926055000 |
| 6 | -1.872007000 | 0.003628000  | -0.574643000 |
| 6 | 0.133655000  | -1.401423000 | -0.931459000 |
| 7 | -1.298721000 | -1.181759000 | -0.662769000 |
| 7 | -1.300569000 | 1.190245000  | -0.660114000 |
| 6 | -2.145966000 | -2.322829000 | -0.498685000 |
| 6 | -2.052488000 | -3.380802000 | -1.401727000 |
| 6 | -3.043056000 | -2.390377000 | 0.565190000  |
| 6 | -2.868930000 | -4.493008000 | -1.245420000 |
| 1 | -1.349996000 | -3.324587000 | -2.225418000 |
| 6 | -3.863659000 | -3.504146000 | 0.708322000  |
| 1 | -3.085435000 | -1.585806000 | 1.291752000  |
| 6 | -3.779506000 | -4.558149000 | -0.193997000 |
| 1 | -2.797892000 | -5.310399000 | -1.955339000 |
| 1 | -4.557802000 | -3.551538000 | 1.540738000  |
| 1 | -4.414568000 | -5.429523000 | -0.075771000 |
| 6 | -2.150002000 | 2.329885000  | -0.497128000 |
| 6 | -2.048591000 | 3.393048000  | -1.393244000 |
| 6 | -3.057311000 | 2.391583000  | 0.558575000  |
| 6 | -2.866480000 | 4.504414000  | -1.238245000 |
| 1 | -1.338636000 | 3.341772000  | -2.210791000 |
| 6 | -3.879191000 | 3.504537000  | 0.700320000  |
| 1 | -3.107499000 | 1.582981000  | 1.280097000  |
| 6 | -3.786669000 | 4.563832000  | -0.194976000 |
| 1 | -2.788701000 | 5.325763000  | -1.942868000 |
| 1 | -4.581063000 | 3.547031000  | 1.526502000  |
| 1 | -4.422717000 | 5.434588000  | -0.077556000 |
| 1 | 0.266761000  | -1.362047000 | -2.017984000 |
| 1 | 0.326014000  | -2.429688000 | -0.622397000 |
| 1 | 0.323110000  | 2.439297000  | -0.611600000 |
| 1 | 0.266506000  | 1.378732000  | -2.012611000 |
| 6 | 0.357131000  | 0.002462000  | 1.652102000  |
| 7 | -0.272577000 | 0.002508000  | 2.633248000  |
| 6 | 2.566619000  | 1.465780000  | 0.757685000  |
| 7 | 3.190928000  | 2.359819000  | 1.176977000  |
| 6 | 2.516624000  | 0.007658000  | -1.652486000 |
| 7 | 3.114087000  | 0.009855000  | -2.652756000 |
| 6 | 2.566888000  | -1.459770000 | 0.752005000  |
| 7 | 3.191084000  | -2.355852000 | 1.167085000  |
| 6 | 3.958905000  | 3.429563000  | 1.691455000  |
| 1 | 4.443325000  | 3.124514000  | 2.620993000  |

|    |              |              |              |
|----|--------------|--------------|--------------|
| 1  | 4.723343000  | 3.716229000  | 0.966948000  |
| 1  | 3.313589000  | 4.287611000  | 1.888482000  |
| 6  | -1.006861000 | 0.003517000  | 3.841612000  |
| 1  | -0.318679000 | 0.021107000  | 4.688635000  |
| 1  | -1.649103000 | 0.885063000  | 3.882058000  |
| 1  | -1.624127000 | -0.894784000 | 3.898791000  |
| 6  | 3.958435000  | -3.428795000 | 1.675856000  |
| 1  | 4.718551000  | -3.716262000 | 0.947131000  |
| 1  | 4.448169000  | -3.126948000 | 2.603650000  |
| 1  | 3.311537000  | -4.285328000 | 1.874302000  |
| 6  | 3.857058000  | 0.012331000  | -3.856206000 |
| 1  | 4.490856000  | -0.875046000 | -3.898066000 |
| 1  | 3.175461000  | 0.008922000  | -4.708259000 |
| 1  | 4.483205000  | 0.905078000  | -3.899097000 |
| 44 | 1.465948000  | 0.004332000  | 0.019597000  |
| 1  | -2.947265000 | 0.002357000  | -0.440695000 |

**[6a-H]<sup>+</sup>**, TE = - 2630.837073

|   |              |              |              |
|---|--------------|--------------|--------------|
| 6 | 0.227903000  | 1.413161000  | 0.461605000  |
| 7 | -1.236687000 | 1.188140000  | 0.150857000  |
| 6 | -1.797612000 | 0.000467000  | 0.034619000  |
| 7 | -1.237424000 | -1.187534000 | 0.151209000  |
| 6 | 0.227064000  | -1.413410000 | 0.461781000  |
| 8 | 0.433744000  | 2.520230000  | 0.895684000  |
| 6 | -2.112965000 | 2.327640000  | 0.096402000  |
| 6 | -1.988801000 | 3.228989000  | -0.955165000 |
| 6 | -2.837952000 | 4.326403000  | -1.014052000 |
| 6 | -3.803191000 | 4.520050000  | -0.029096000 |
| 6 | -3.916738000 | 3.615546000  | 1.020361000  |
| 6 | -3.064856000 | 2.517718000  | 1.090586000  |
| 1 | -1.239177000 | 3.064618000  | -1.721640000 |
| 1 | -2.749274000 | 5.029275000  | -1.835493000 |
| 1 | -4.465971000 | 5.377279000  | -0.080834000 |
| 1 | -4.664435000 | 3.764057000  | 1.791997000  |
| 1 | -3.135066000 | 1.815252000  | 1.914796000  |
| 6 | -2.114445000 | -2.326479000 | 0.097064000  |
| 6 | -1.990722000 | -3.228286000 | -0.954163000 |
| 6 | -2.840617000 | -4.325133000 | -1.012820000 |
| 6 | -3.806163000 | -4.517773000 | -0.027968000 |
| 6 | -3.919266000 | -3.612828000 | 1.021154000  |
| 6 | -3.066635000 | -2.515561000 | 1.091153000  |
| 1 | -1.240860000 | -3.064703000 | -1.720571000 |
| 1 | -2.752282000 | -5.028350000 | -1.834002000 |
| 1 | -4.469536000 | -5.374554000 | -0.079526000 |
| 1 | -4.667204000 | -3.760545000 | 1.792710000  |
| 1 | -3.136518000 | -1.812769000 | 1.915115000  |

|    |              |              |              |
|----|--------------|--------------|--------------|
| 8  | 0.432331000  | -2.520613000 | 0.895803000  |
| 26 | 1.497530000  | -0.000524000 | 0.045018000  |
| 6  | 2.772357000  | -1.341852000 | -0.353094000 |
| 6  | 2.002399000  | -0.000336000 | 1.844727000  |
| 6  | 2.773042000  | 1.340045000  | -0.353453000 |
| 6  | 0.904086000  | -0.000640000 | -1.727791000 |
| 7  | 3.557494000  | 2.159879000  | -0.597940000 |
| 7  | 3.556465000  | -2.162061000 | -0.597420000 |
| 7  | 2.304652000  | -0.000043000 | 2.965677000  |
| 7  | 0.536782000  | -0.000816000 | -2.829877000 |
| 6  | 0.092169000  | -0.001211000 | -4.173289000 |
| 1  | 0.473353000  | -0.887428000 | -4.682550000 |
| 1  | -0.998526000 | -0.010666000 | -4.194877000 |
| 1  | 0.457819000  | 0.894115000  | -4.677982000 |
| 6  | 4.503558000  | 3.172023000  | -0.886116000 |
| 1  | 4.453609000  | 3.425547000  | -1.945892000 |
| 1  | 4.280702000  | 4.057726000  | -0.289576000 |
| 1  | 5.505200000  | 2.813516000  | -0.645202000 |
| 6  | 2.666148000  | 0.000637000  | 4.333630000  |
| 1  | 3.208002000  | -0.916820000 | 4.567456000  |
| 1  | 3.302992000  | 0.861633000  | 4.541358000  |
| 1  | 1.766514000  | 0.057706000  | 4.947967000  |
| 6  | 4.502477000  | -3.174050000 | -0.886345000 |
| 1  | 5.484124000  | -2.869874000 | -0.520651000 |
| 1  | 4.203063000  | -4.101541000 | -0.396343000 |
| 1  | 4.549190000  | -3.331244000 | -1.964747000 |
| 1  | -2.866513000 | 0.000771000  | -0.159826000 |

**[6b-H]<sup>+</sup>**, TE = - 5778.328802

|   |              |              |              |
|---|--------------|--------------|--------------|
| 6 | 0.079730000  | 1.467766000  | 0.471794000  |
| 7 | -1.381049000 | 1.195336000  | 0.175673000  |
| 6 | -1.929623000 | -0.000061000 | 0.060596000  |
| 7 | -1.381031000 | -1.195460000 | 0.175524000  |
| 6 | 0.079806000  | -1.467883000 | 0.471570000  |
| 8 | 0.257256000  | 2.583919000  | 0.895094000  |
| 6 | -2.279969000 | 2.318695000  | 0.117425000  |
| 6 | -2.198444000 | 3.196725000  | -0.957496000 |
| 6 | -3.066014000 | 4.279600000  | -1.018139000 |
| 6 | -4.007209000 | 4.481075000  | -0.011882000 |
| 6 | -4.078515000 | 3.599106000  | 1.060269000  |
| 6 | -3.207941000 | 2.516115000  | 1.132219000  |
| 1 | -1.466634000 | 3.026422000  | -1.739709000 |
| 1 | -3.010542000 | 4.964650000  | -1.857322000 |
| 1 | -4.684565000 | 5.326750000  | -0.064763000 |
| 1 | -4.807856000 | 3.753831000  | 1.848058000  |
| 1 | -3.245066000 | 1.830965000  | 1.972937000  |



|    |              |              |              |
|----|--------------|--------------|--------------|
| 6  | -2.279922000 | -2.318824000 | 0.117232000  |
| 6  | -2.198118000 | -3.197050000 | -0.957513000 |
| 6  | -3.065679000 | -4.279926000 | -1.018198000 |
| 6  | -4.007159000 | -4.481217000 | -0.012167000 |
| 6  | -4.078748000 | -3.599057000 | 1.059806000  |
| 6  | -3.208177000 | -2.516067000 | 1.131804000  |
| 1  | -1.466103000 | -3.026894000 | -1.739564000 |
| 1  | -3.009980000 | -4.965125000 | -1.857244000 |
| 1  | -4.684505000 | -5.326895000 | -0.065087000 |
| 1  | -4.808303000 | -3.753631000 | 1.847427000  |
| 1  | -3.245517000 | -1.830789000 | 1.972410000  |
| 8  | 0.257372000  | -2.584075000 | 0.894729000  |
| 6  | 2.790414000  | -1.440510000 | -0.392381000 |
| 6  | 2.004099000  | -0.000181000 | 1.939512000  |
| 6  | 2.790359000  | 1.440646000  | -0.392147000 |
| 6  | 0.814358000  | 0.000229000  | -1.852825000 |
| 7  | 3.553012000  | 2.282683000  | -0.632669000 |
| 7  | 3.553111000  | -2.282479000 | -0.633019000 |
| 7  | 2.321417000  | -0.000288000 | 3.055991000  |
| 7  | 0.434946000  | 0.000385000  | -2.950451000 |
| 6  | -0.022918000 | 0.000750000  | -4.289378000 |
| 1  | 0.338502000  | -0.894544000 | -4.797071000 |
| 1  | -1.113732000 | 0.009788000  | -4.299557000 |
| 1  | 0.353313000  | 0.887311000  | -4.801622000 |
| 6  | 4.476661000  | 3.315377000  | -0.920712000 |
| 1  | 4.392363000  | 3.595112000  | -1.971690000 |
| 1  | 4.258451000  | 4.182148000  | -0.295366000 |
| 1  | 5.489621000  | 2.965386000  | -0.717524000 |
| 6  | 2.708556000  | -0.000416000 | 4.416943000  |
| 1  | 3.305185000  | -0.889726000 | 4.624484000  |
| 1  | 3.299955000  | 0.891998000  | 4.626141000  |
| 1  | 1.818662000  | -0.003610000 | 5.047700000  |
| 6  | 4.476762000  | -3.315115000 | -0.921158000 |
| 1  | 5.489813000  | -2.964782000 | -0.718987000 |
| 1  | 4.259263000  | -4.181573000 | -0.295124000 |
| 1  | 4.391721000  | -3.595527000 | -1.971901000 |
| 44 | 1.449342000  | 0.000003000  | 0.029979000  |
| 1  | -2.998840000 | -0.000052000 | -0.132674000 |
